# Supplementary material for: Persistent azulene α-carbocations: synthesis from aldehydes, spectroscopic and crystallographic properties
Source: Royal Society of Chemistry journal article supplement (doi:10.1039/d2ob01695h), 2023-01-01
Supplement: d2ob01695h1.pdf [file d2ob01695h1.pdf]

## **Persistent azulene $\alpha$ -carbocations: Synthesis from aldehydes, spectroscopic and crystallographic properties**

Catajina Harabajiu,<sup>a</sup> Jodie L. Hann,<sup>a</sup> Lloyd C. Murfin,<sup>a</sup> Gabriele Kociok-Köhn<sup>b</sup> and Simon E. Lewis\*<sup>a</sup>

- a. Department of Chemistry, University of Bath, Bath, BA2 7AY, UK.  
b. Material and Chemical Characterisation Facility (MC<sup>2</sup>), University of Bath, Bath, BA2 7AY, UK.

### **ELECTRONIC SUPPORTING INFORMATION**

|                              |           |           |
|------------------------------|-----------|-----------|
| General Experimental Details | . . . . . | Page S2   |
| NMR, IR and Mass spectra     | . . . . . | Page S3   |
| X-ray crystallographic data  | . . . . . | Page S111 |

## **General Experimental Details**

**Synthetic chemistry and compound characterisation.** Reagents were purchased from Fluorochem, Merck and Alfa-Aesar. Reactions were carried out under an atmosphere of air. Solvents were removed using Büchi rotary evaporators and with high vacuum on a Schlenk line. Capillary melting points were recorded on a Büchi 535 melting point apparatus and are uncorrected. UV-Vis experiments were performed on a Shimadzu UV-1800 UV spectrometer, for which a quartz cuvette of 1 cm path length was used.  $^1\text{H}$  and  $^{13}\text{C}$  NMR spectra were obtained using a 500 MHz Agilent ProPulse 500 or a 300 MHz Bruker NMR spectrometer, for which proton decoupling was active for  $^{13}\text{C}$  NMR. Spectra were acquired at 298 K and were referenced to residual solvent peaks; chemical shifts are reported in parts per million (ppm) relative to residual acetonitrile ( $\delta = 1.94$  ppm,  $^1\text{H}$ ; 1.32 ppm,  $^{13}\text{C}$ ). Coupling constants,  $J$ , reported in Hz, were calculated using MestreNova 9.0 to the nearest 0.1 Hz.  $^1\text{H}$  and  $^{13}\text{C}\{^1\text{H}\}$  assignments for novel compounds are corroborated through 2D (COSY, HSQC, HMBC). Infrared (IR) spectra were recorded on a Perkin-Elmer Spectrum 100 ATR-FTIR spectrometer with only selected absorbances quoted as  $\nu$  in  $\text{cm}^{-1}$ . For mass spectrometry a microTOF electrospray time-of-flight (ESI-TOF) mass spectrometer (Bruker Daltonik GmbH, Bremen, Germany) was used. Data are reported in the form of  $m/z$ . The observed mass and isotope pattern matched the corresponding theoretical values as calculated from the expected molecular formula. X-Ray crystallography was recorded on a Nonius Kappa CCD diffractometer with Mo-K $\alpha$  radiation ( $\lambda=0.71074$  Å). All structures were solved by direct methods and refined on all F2 data using SHELX-97 suite of programs.

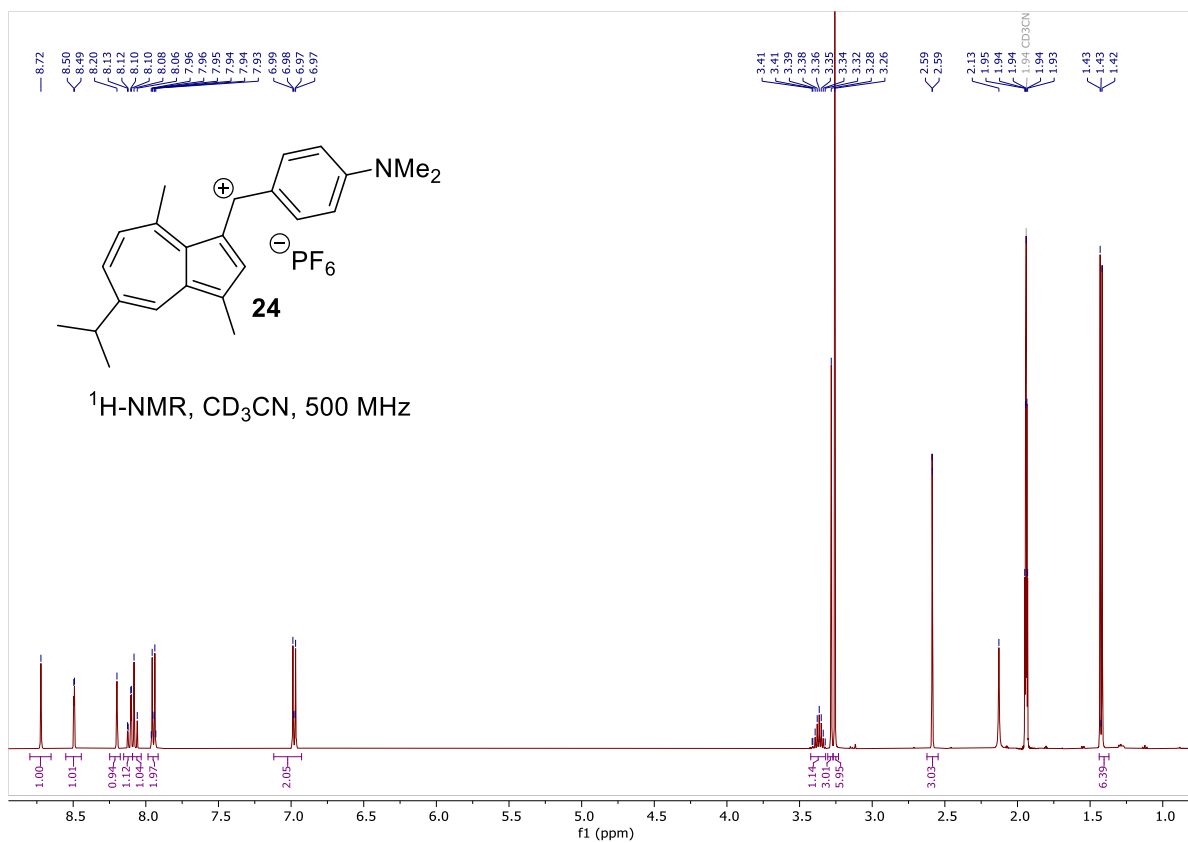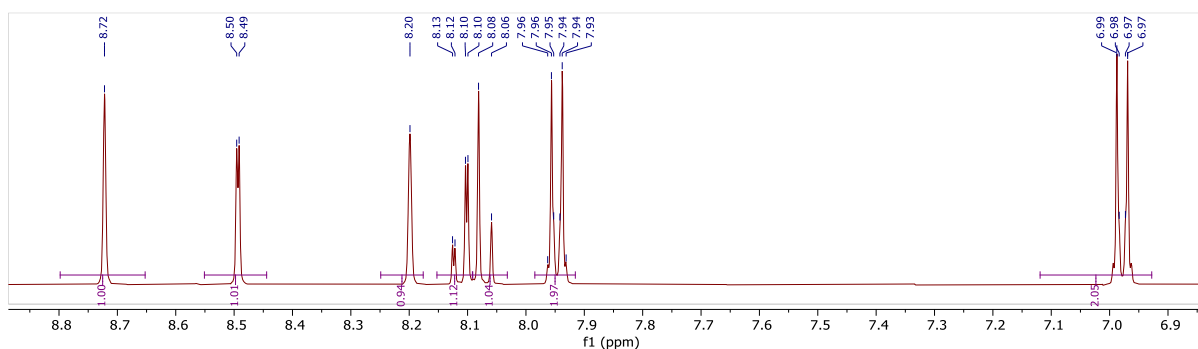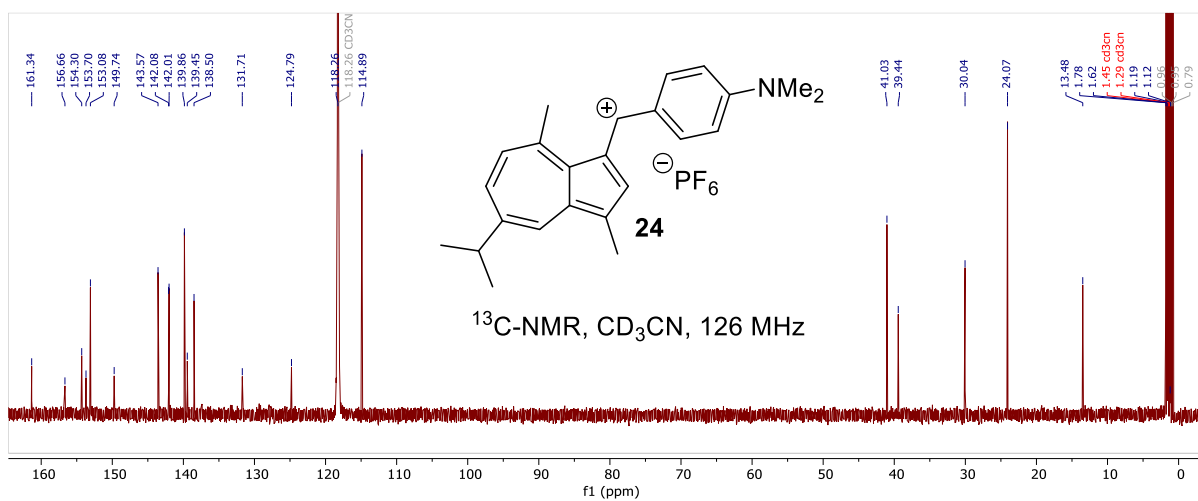

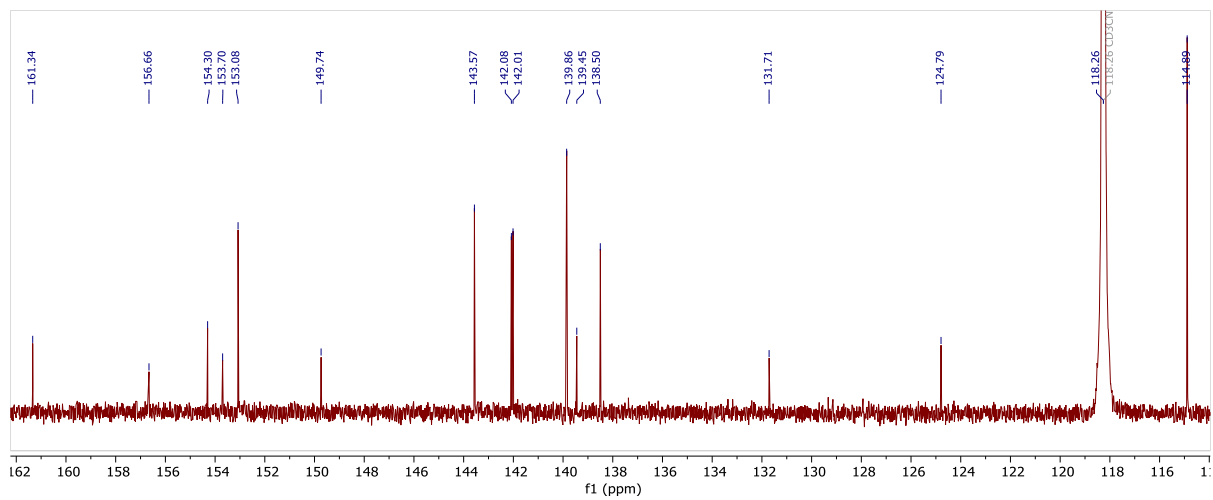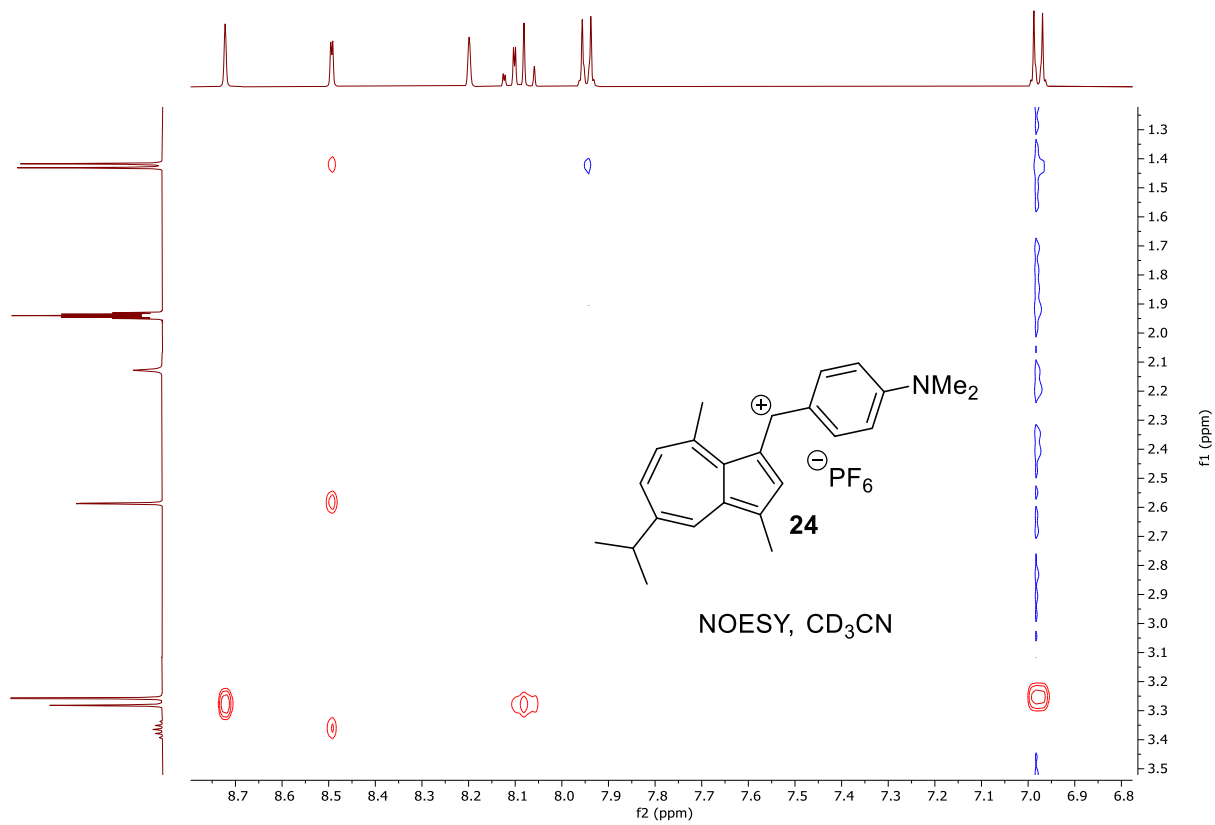

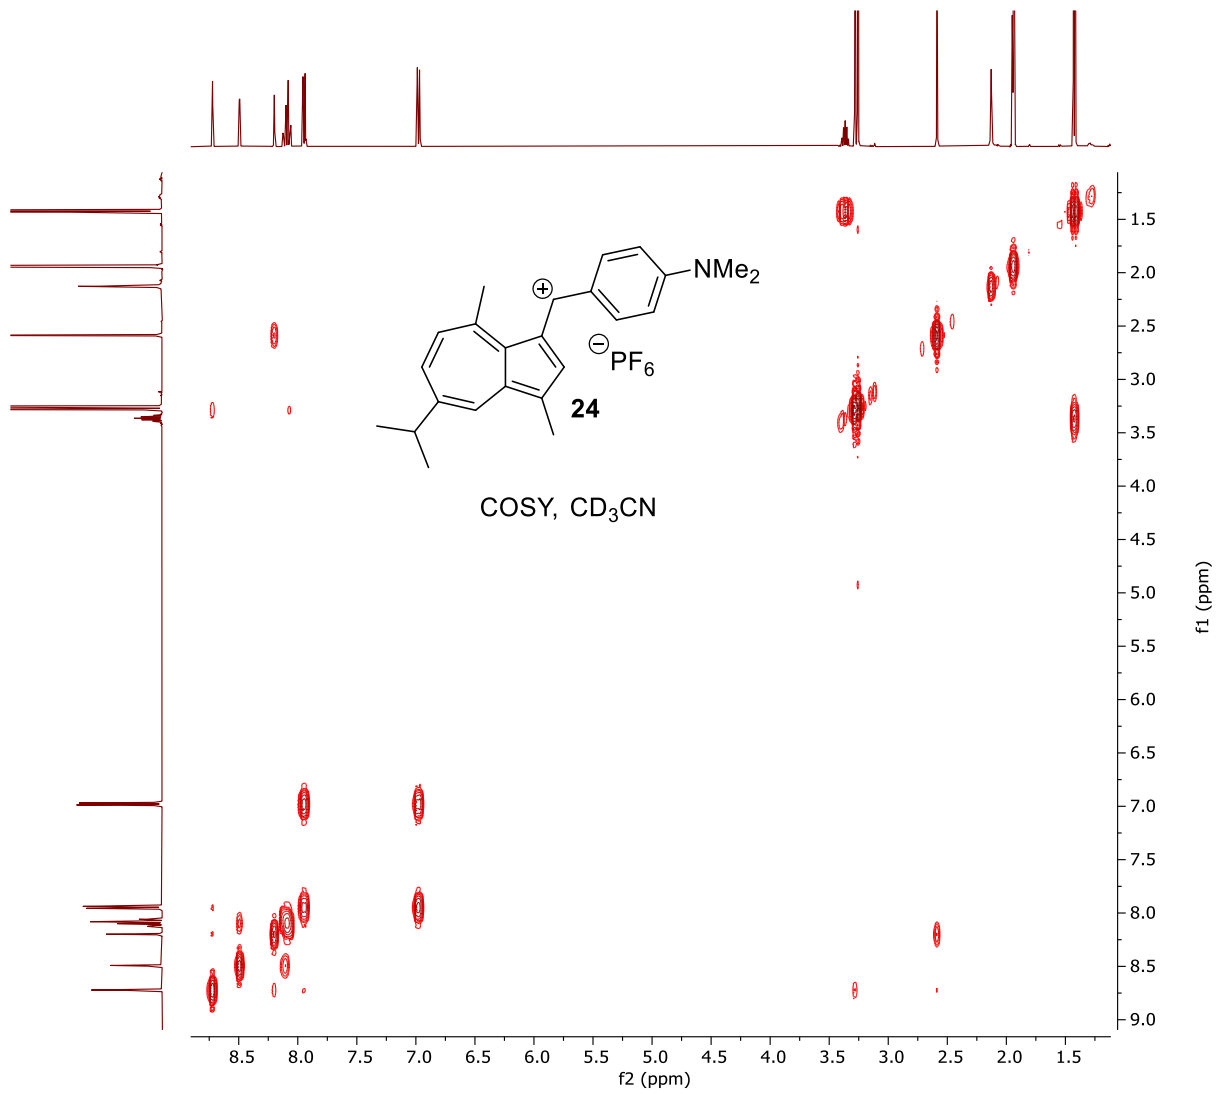

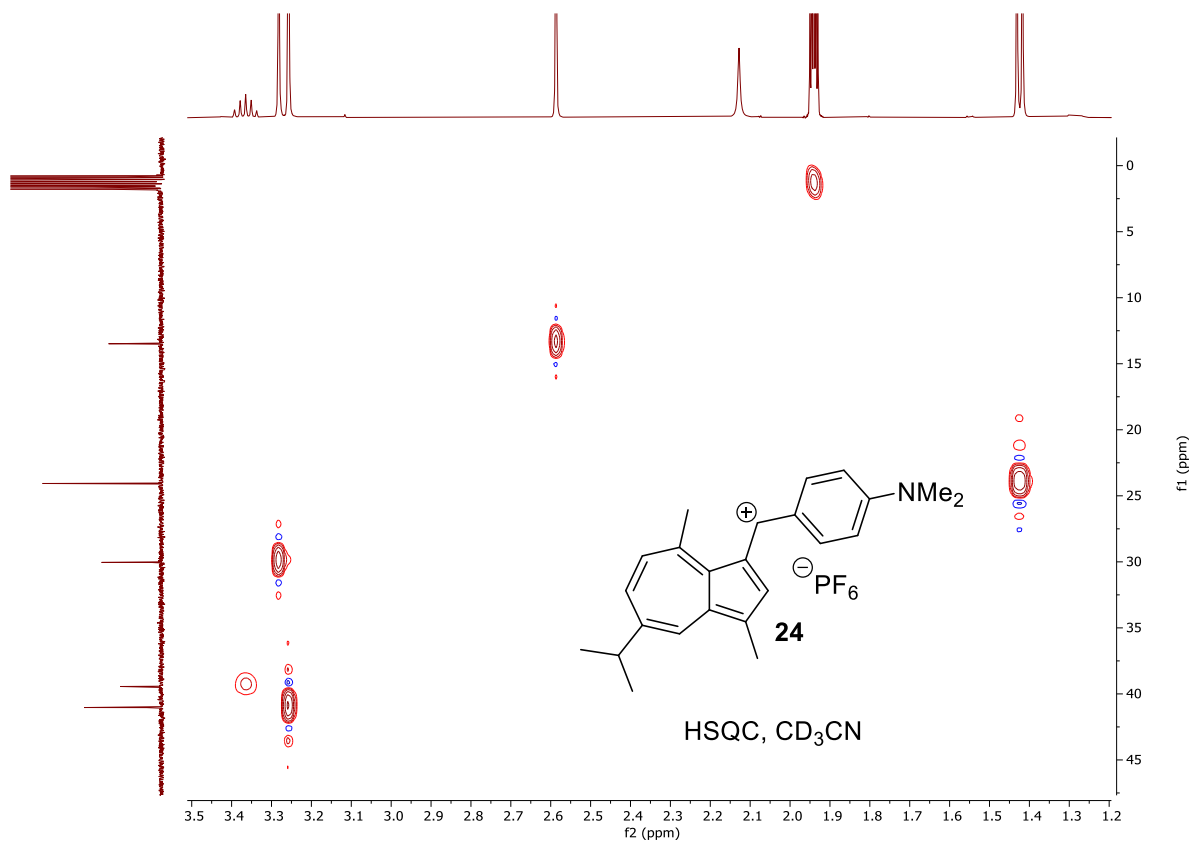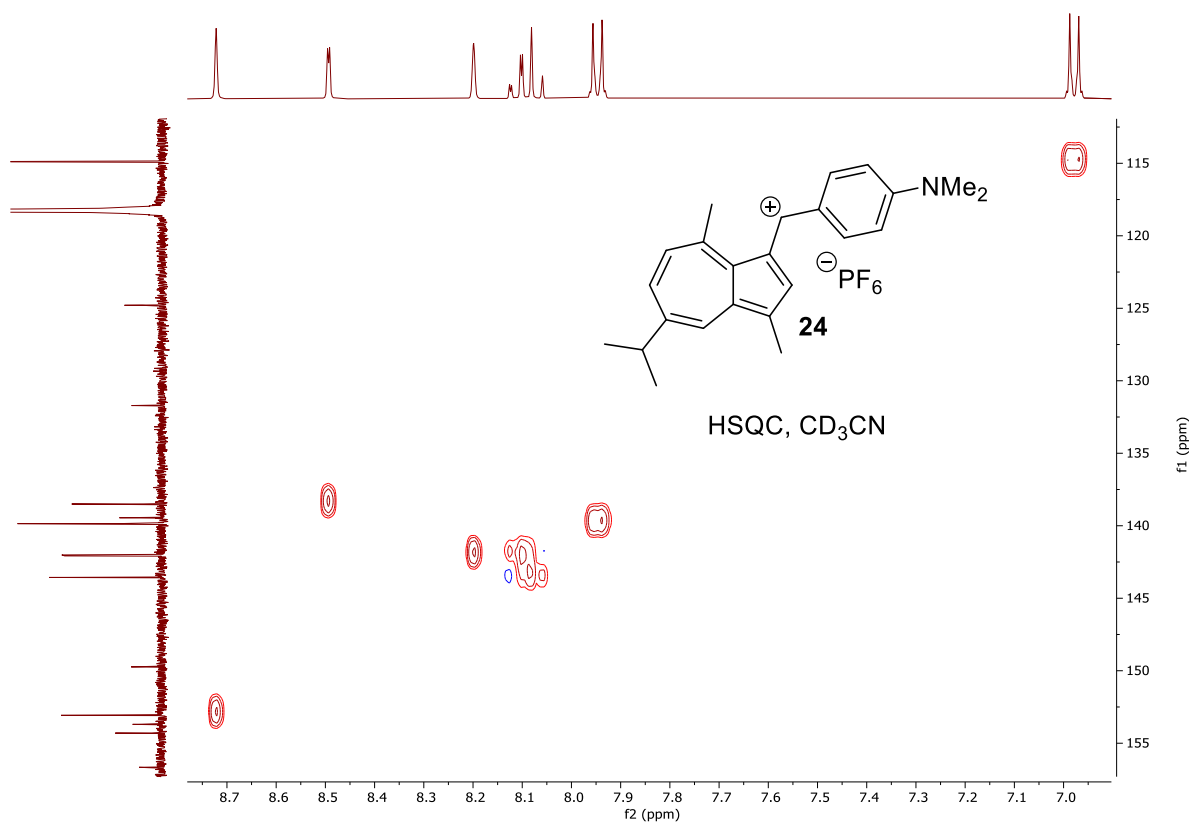

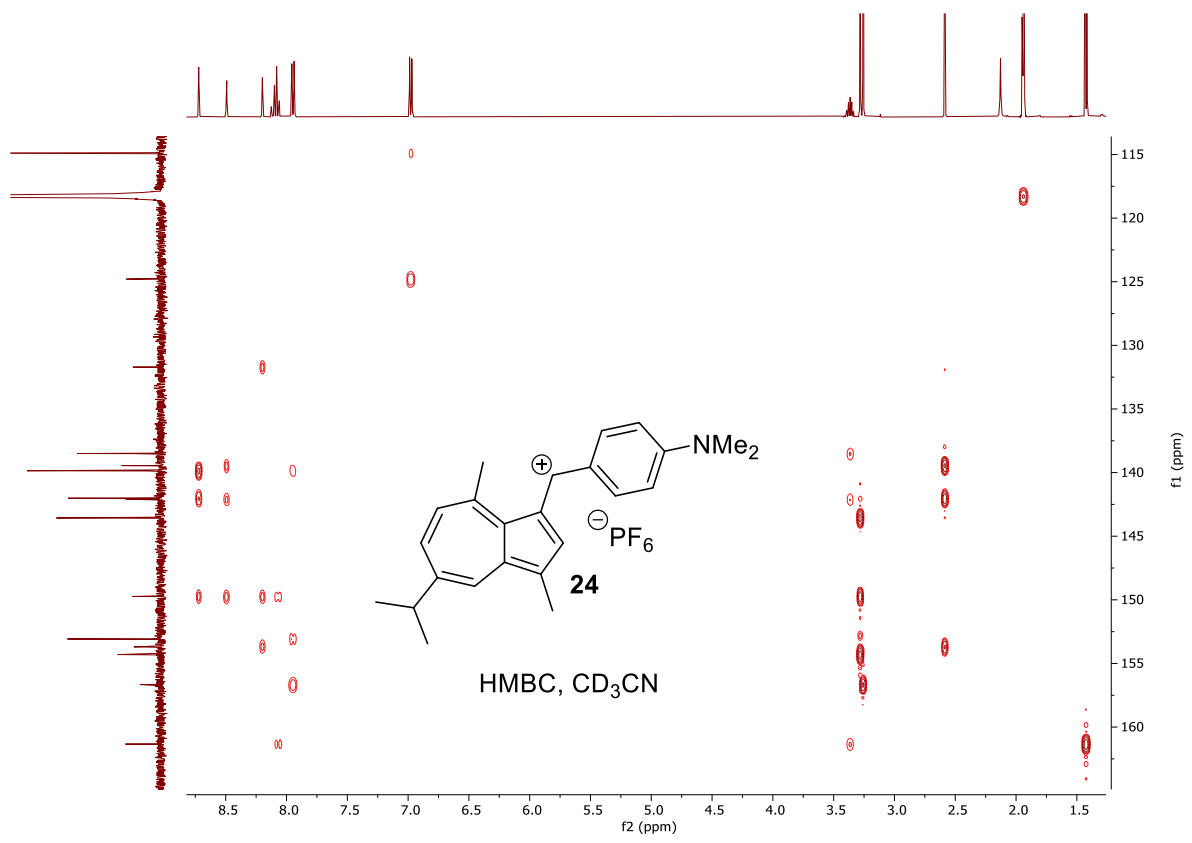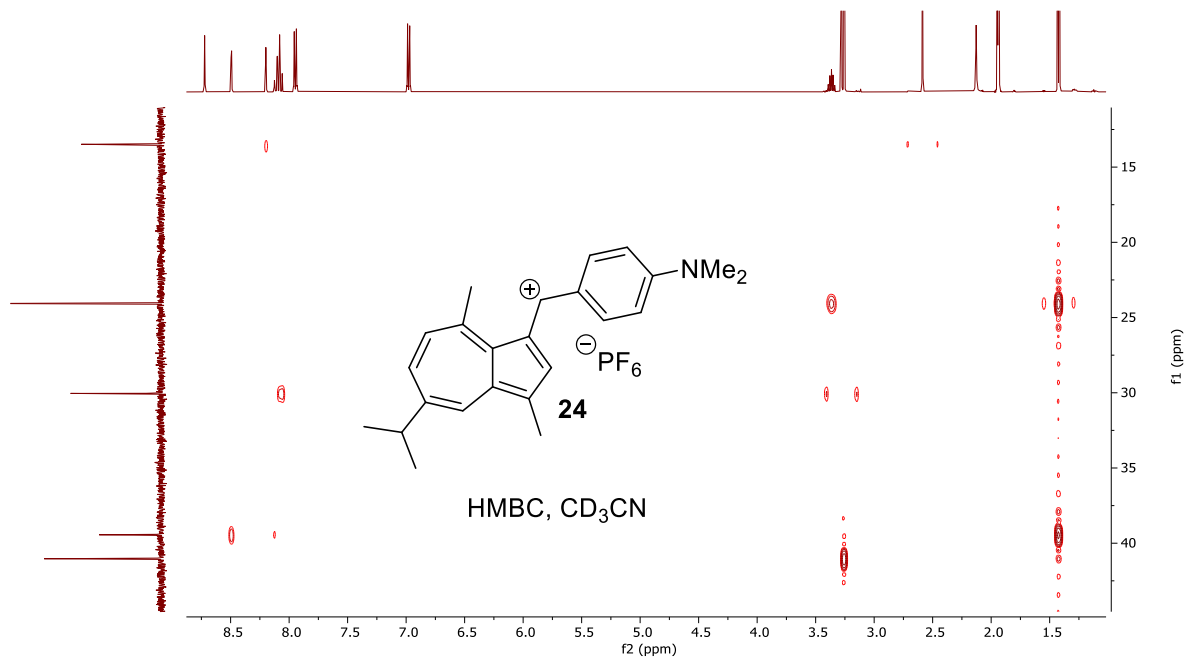

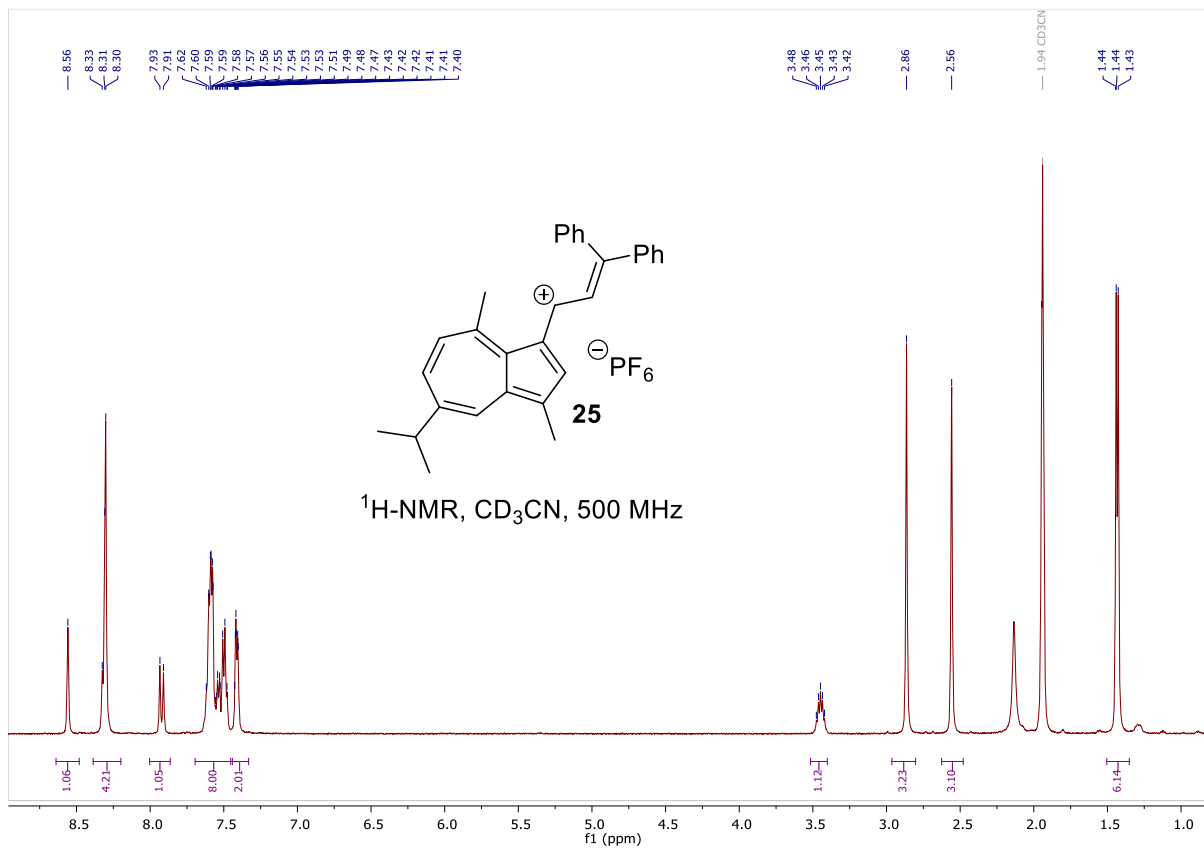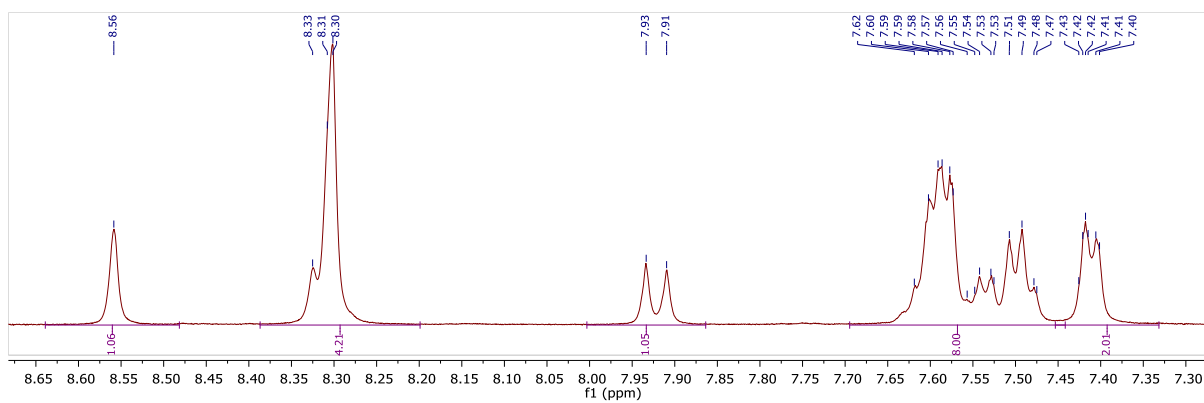



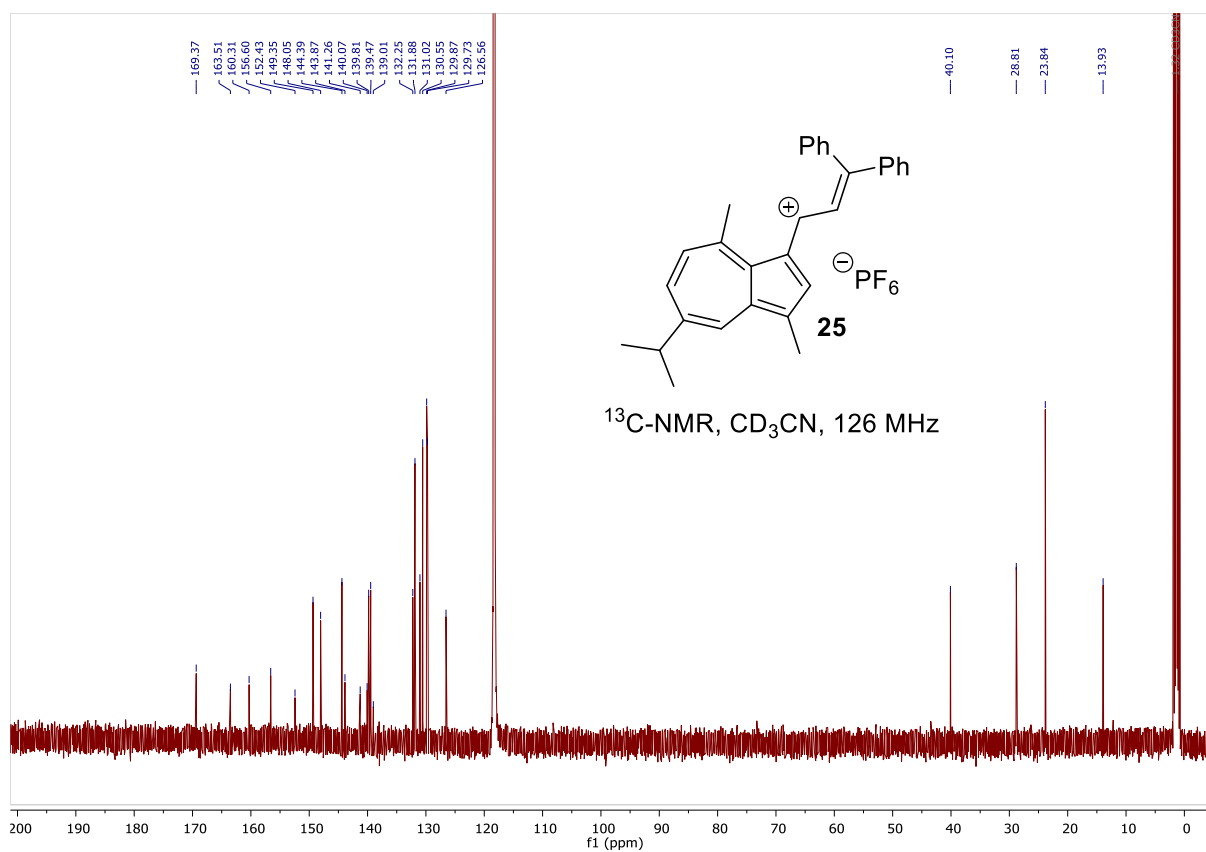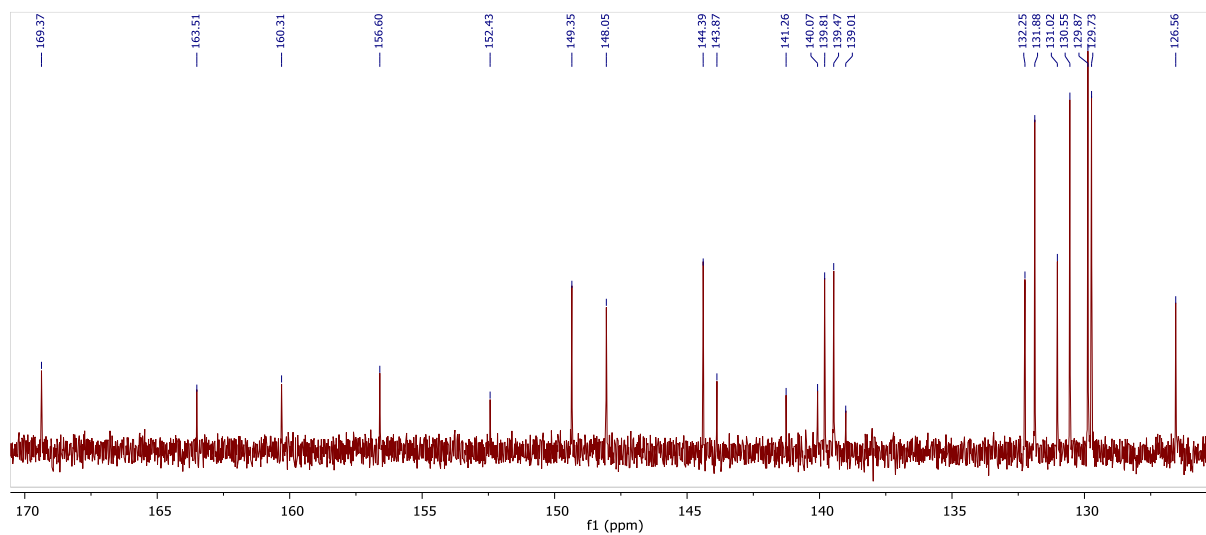

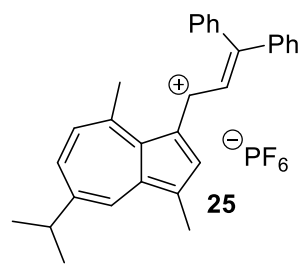

COSY, CD<sub>3</sub>CN

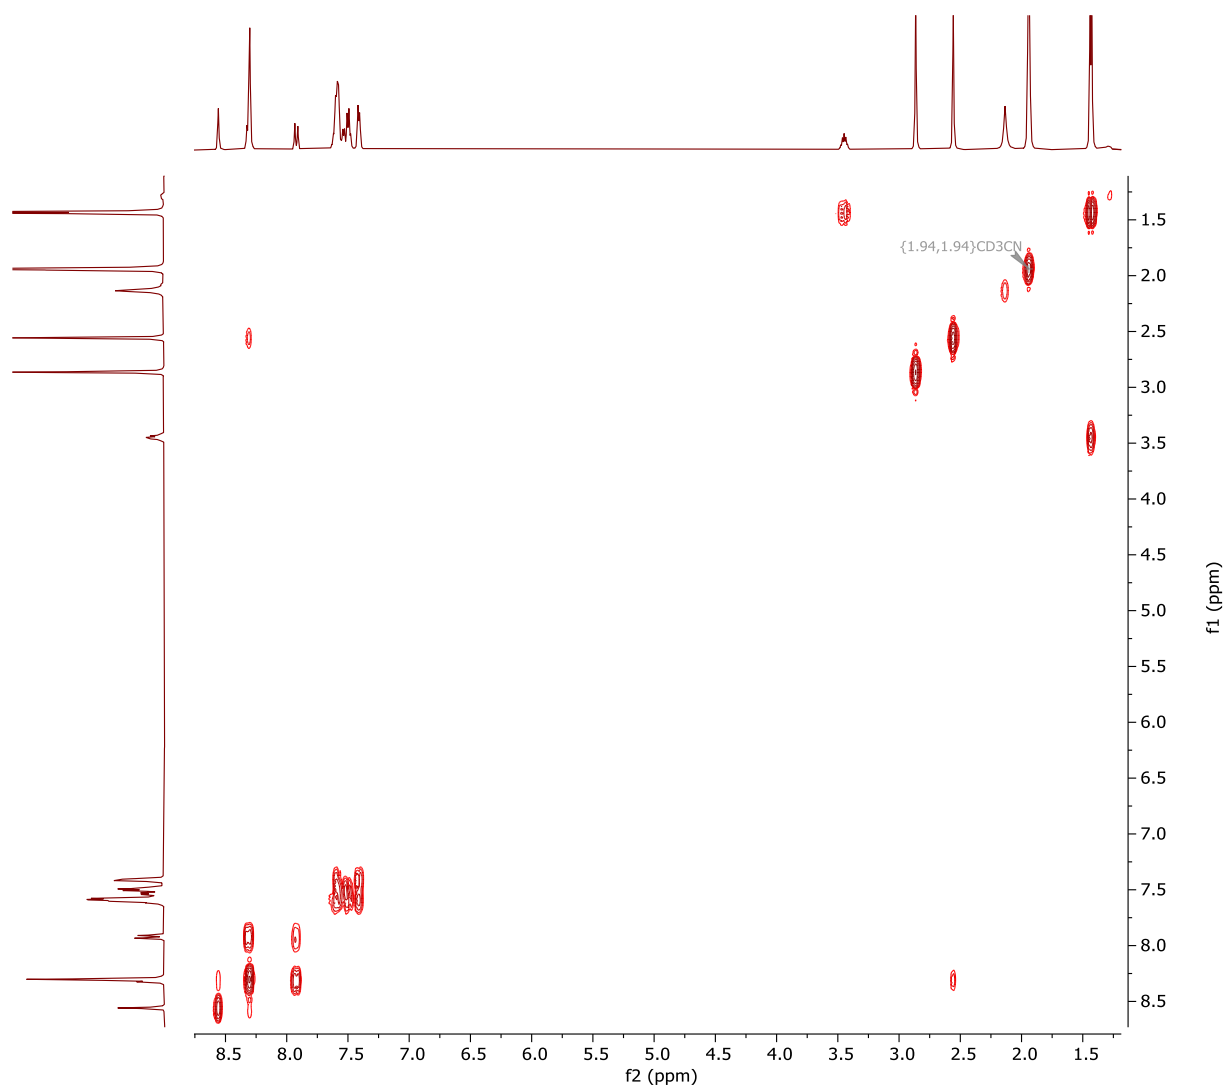

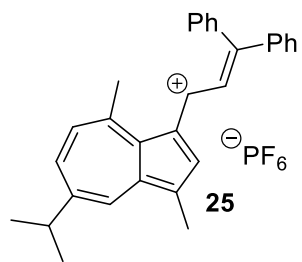

NOESY,  $\text{CD}_3\text{CN}$

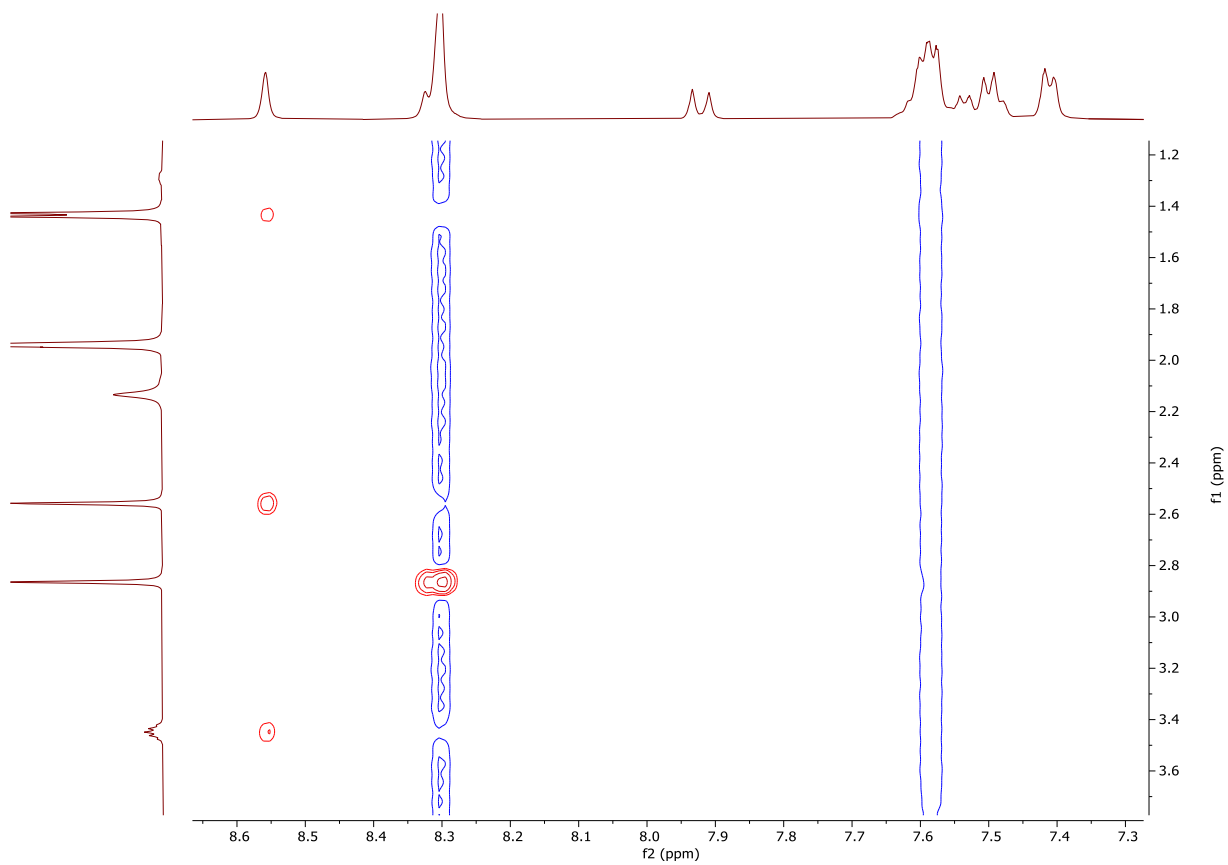

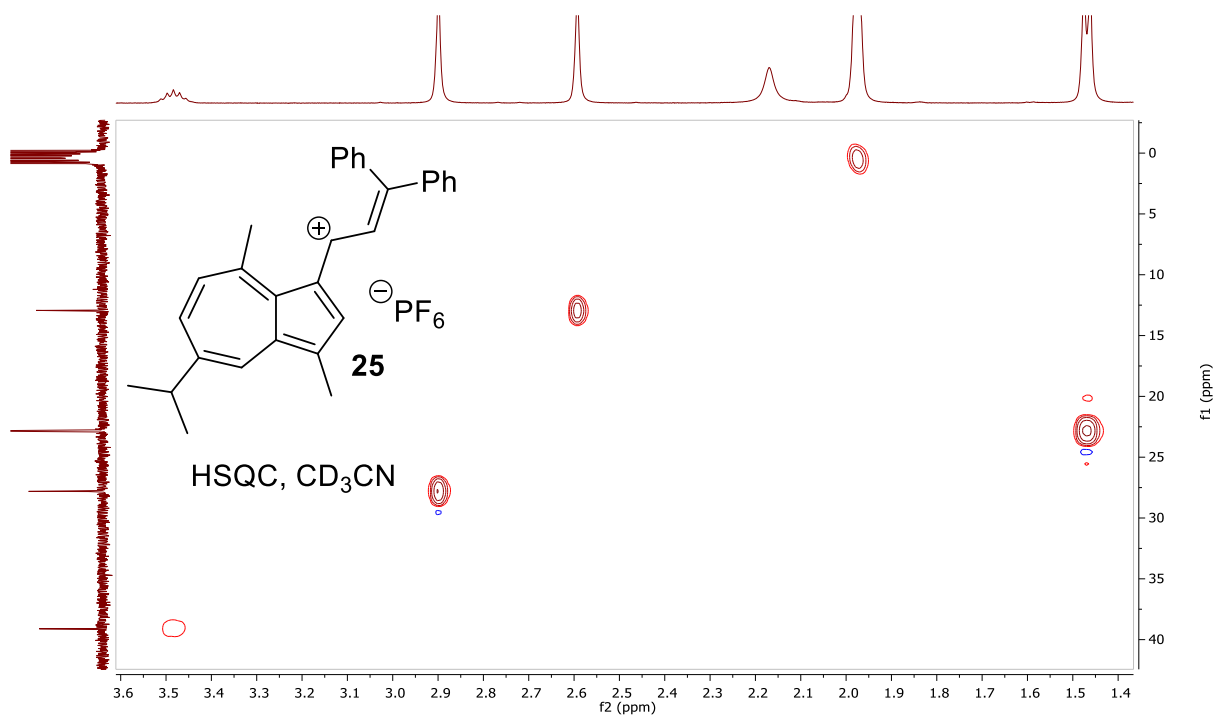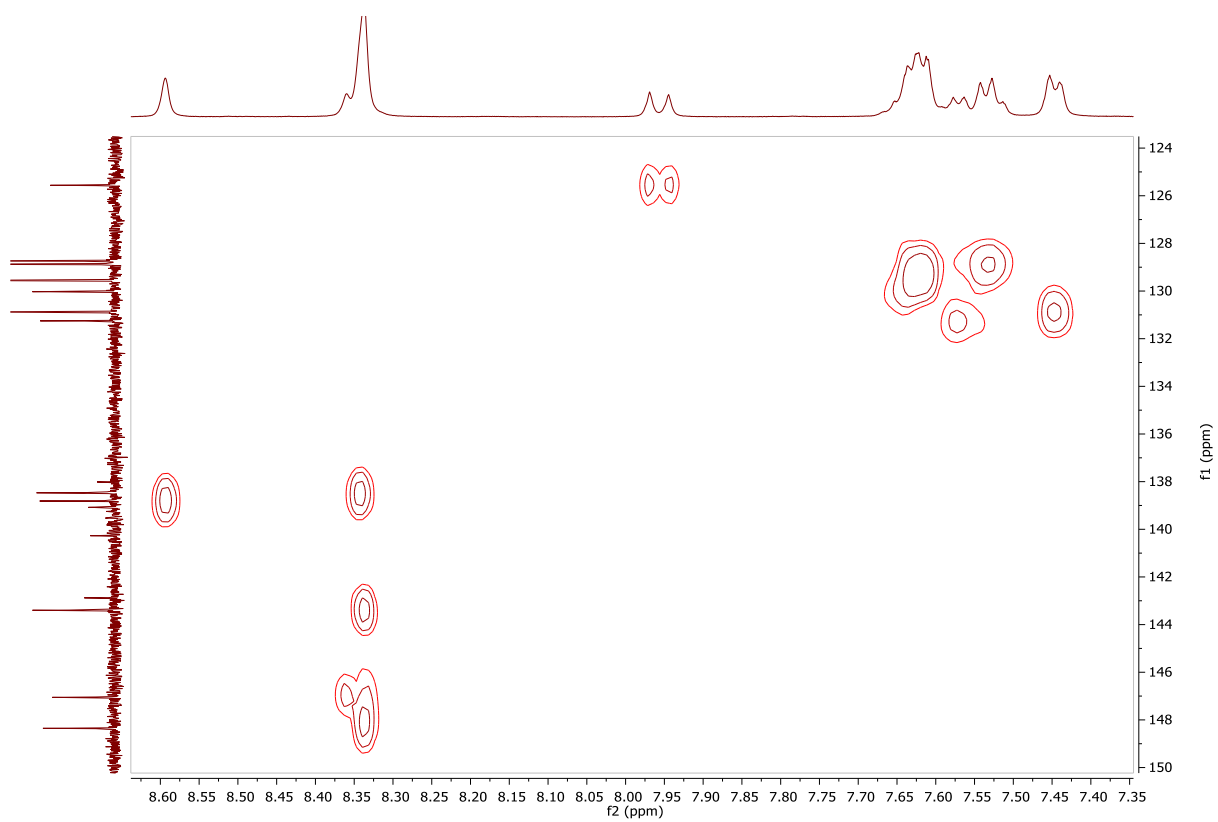

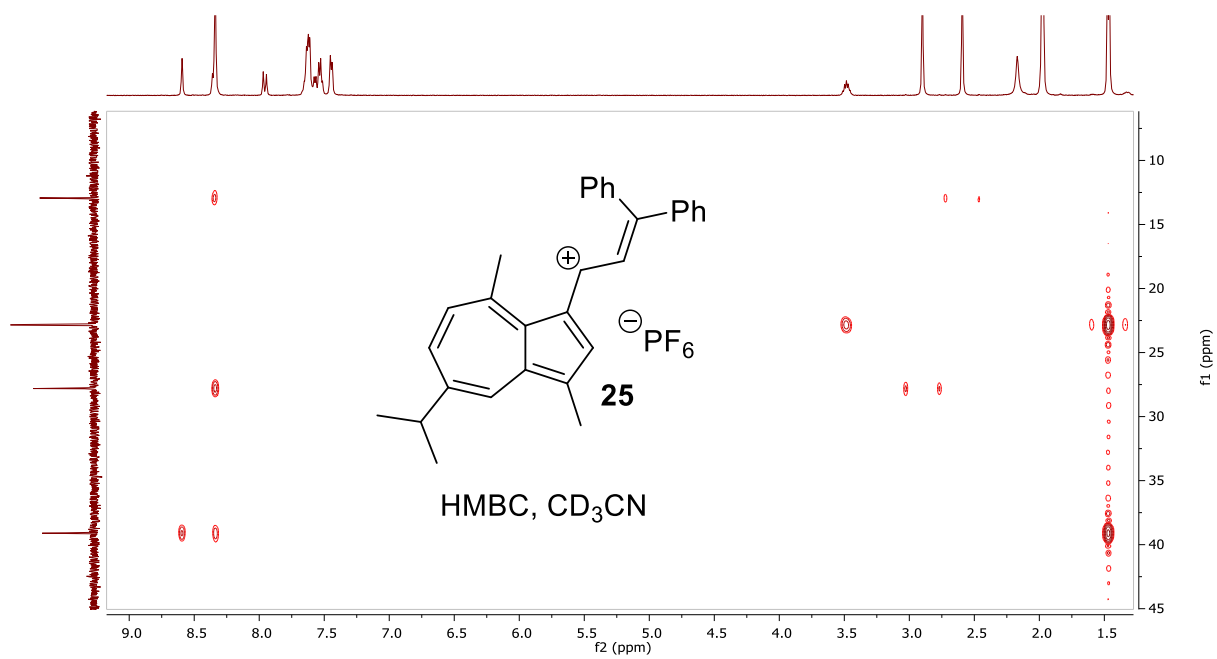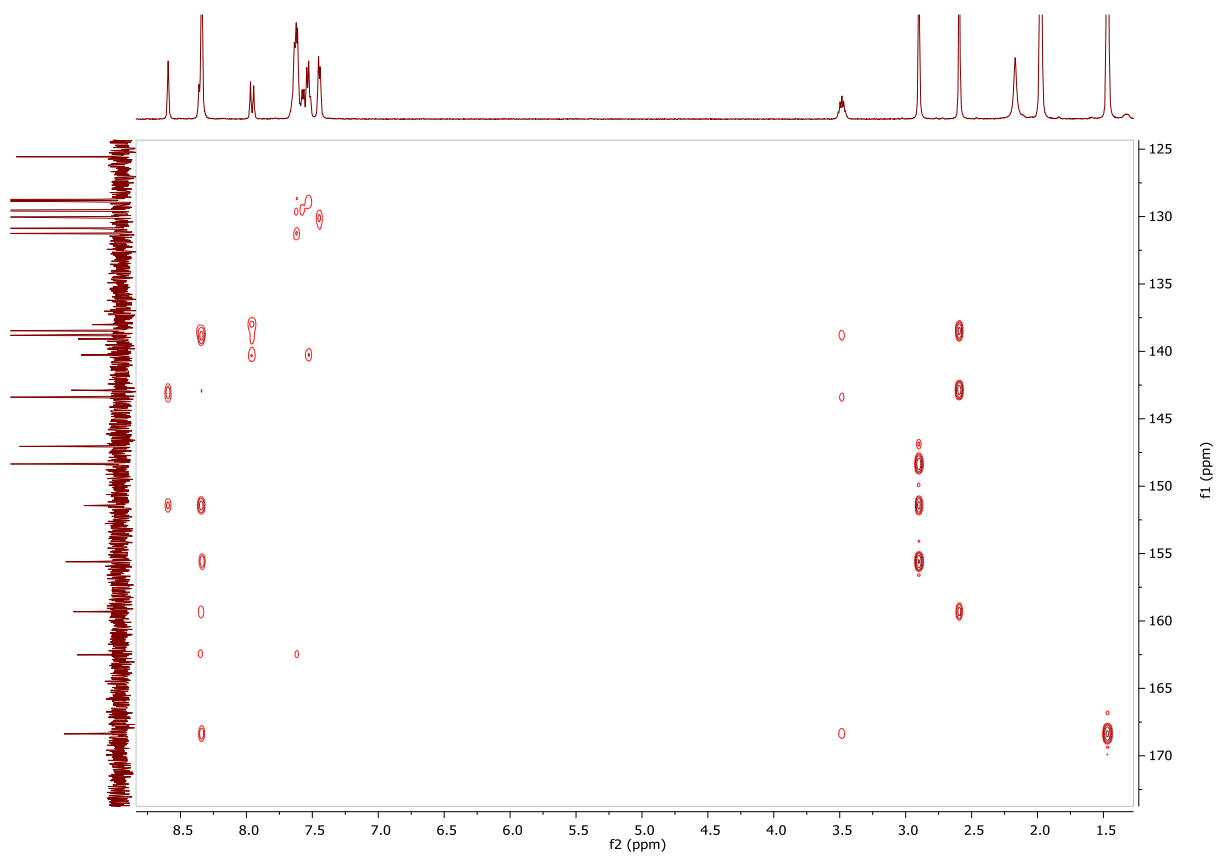

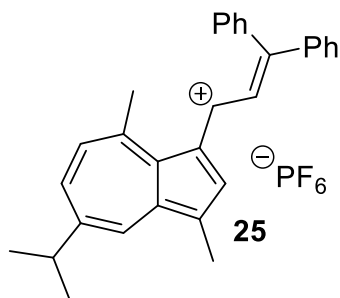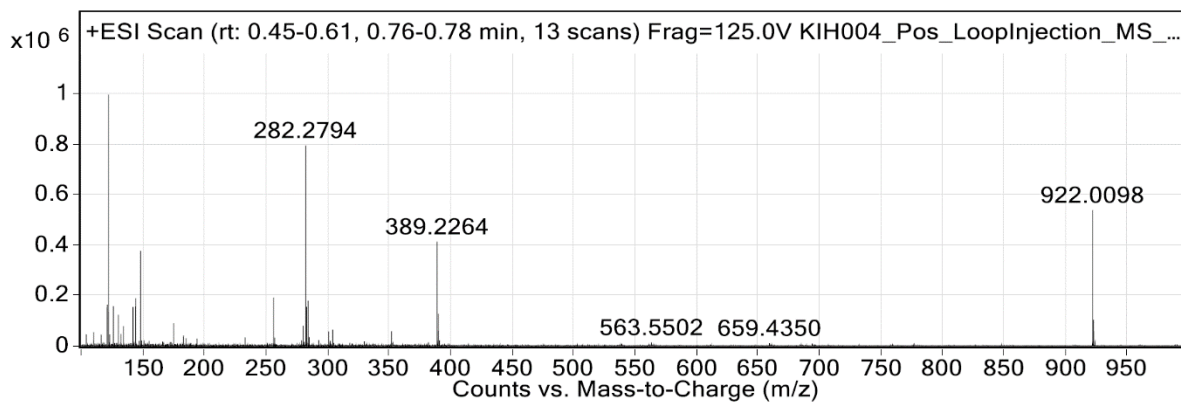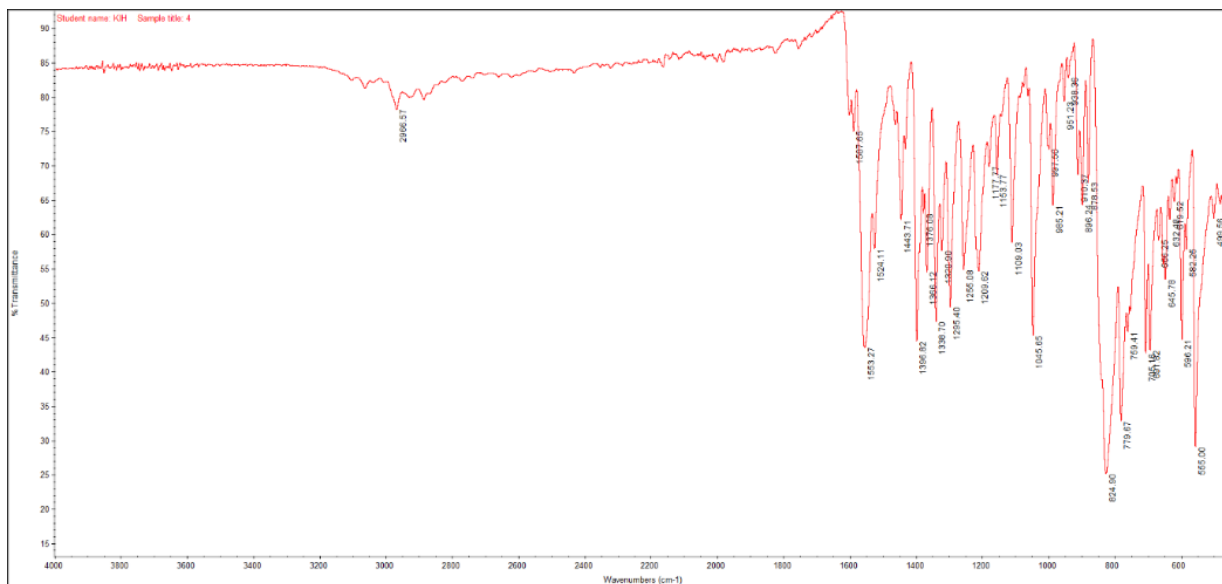

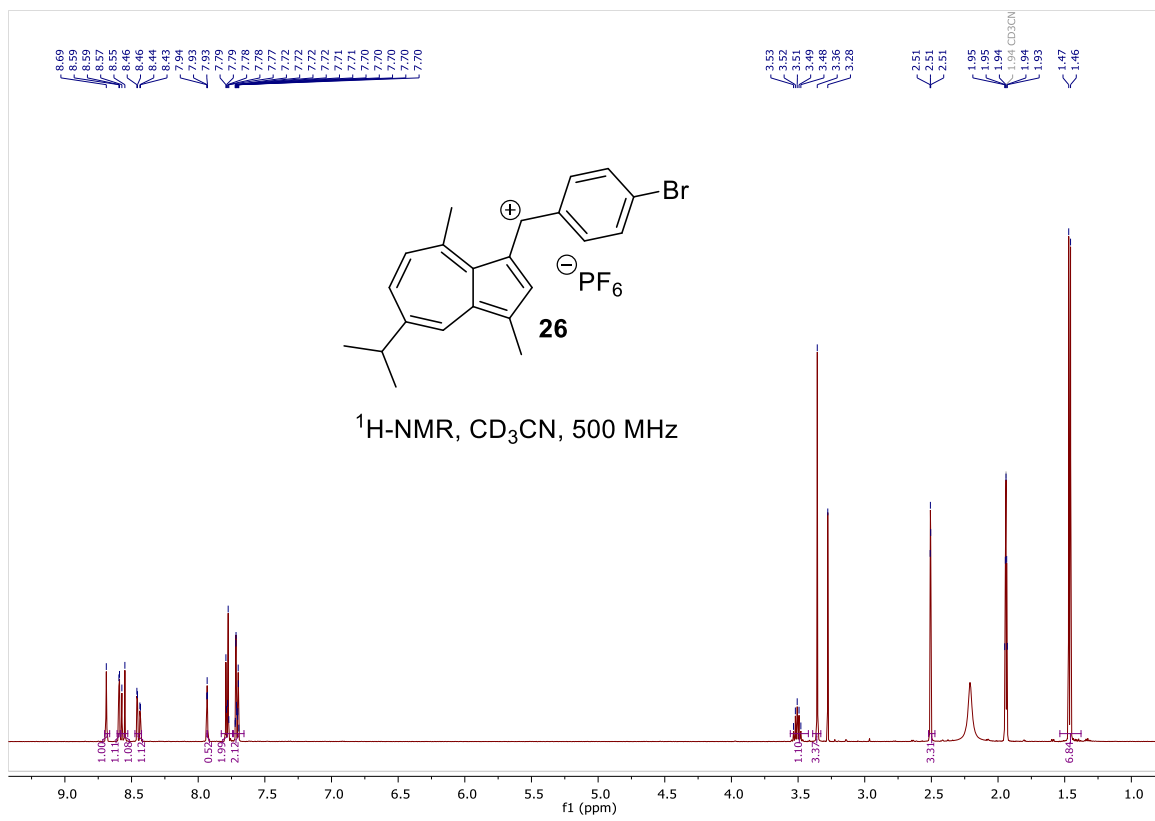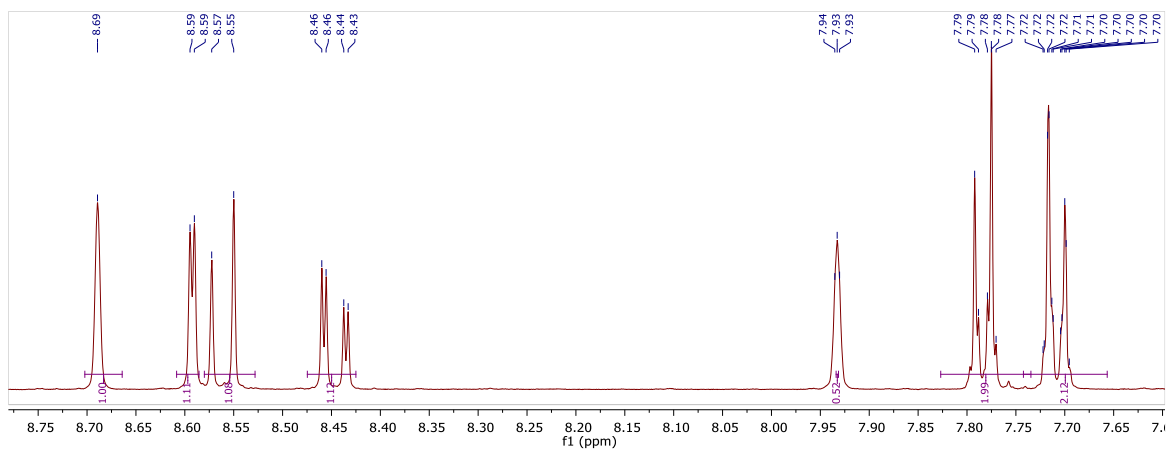

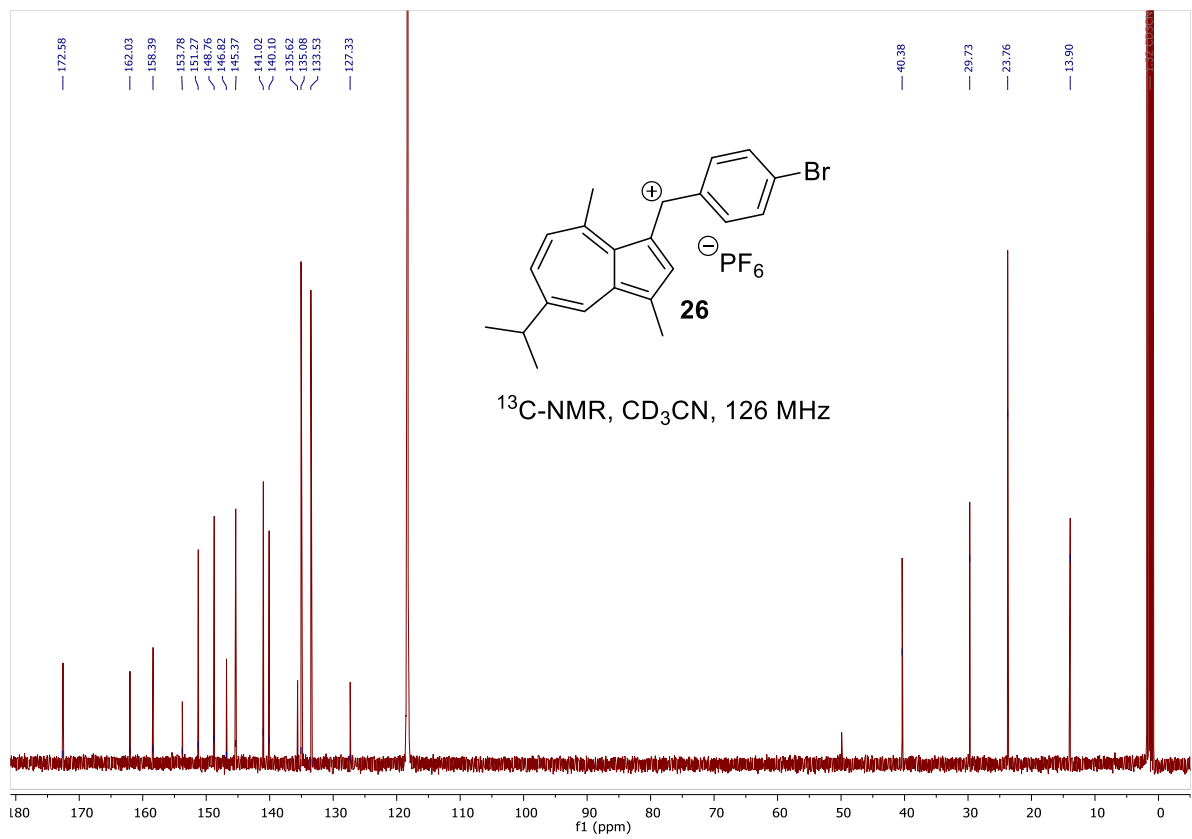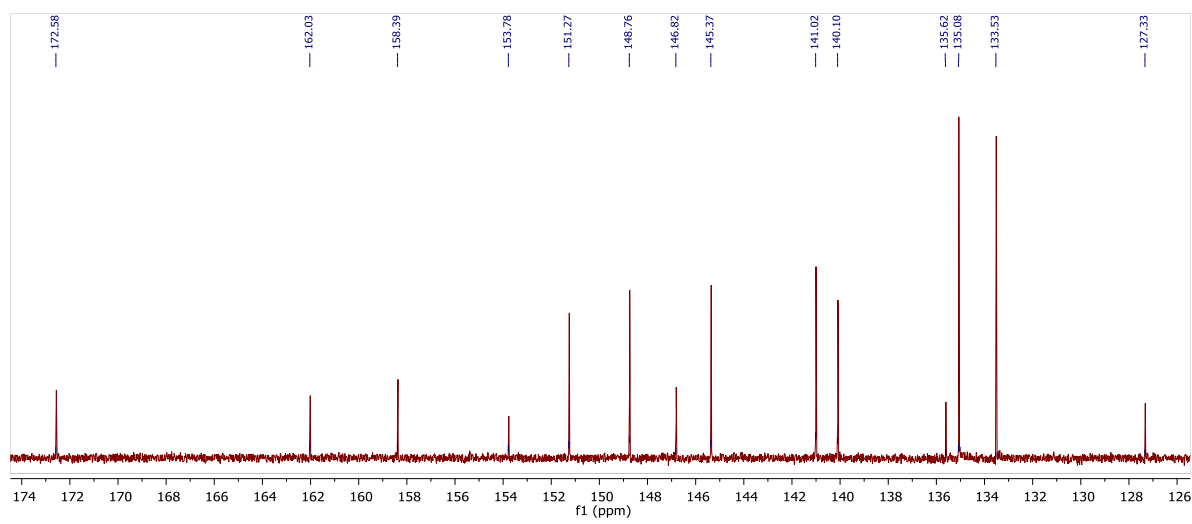



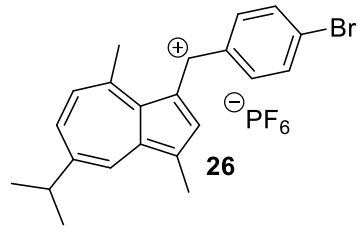

COSY, CD<sub>3</sub>CN

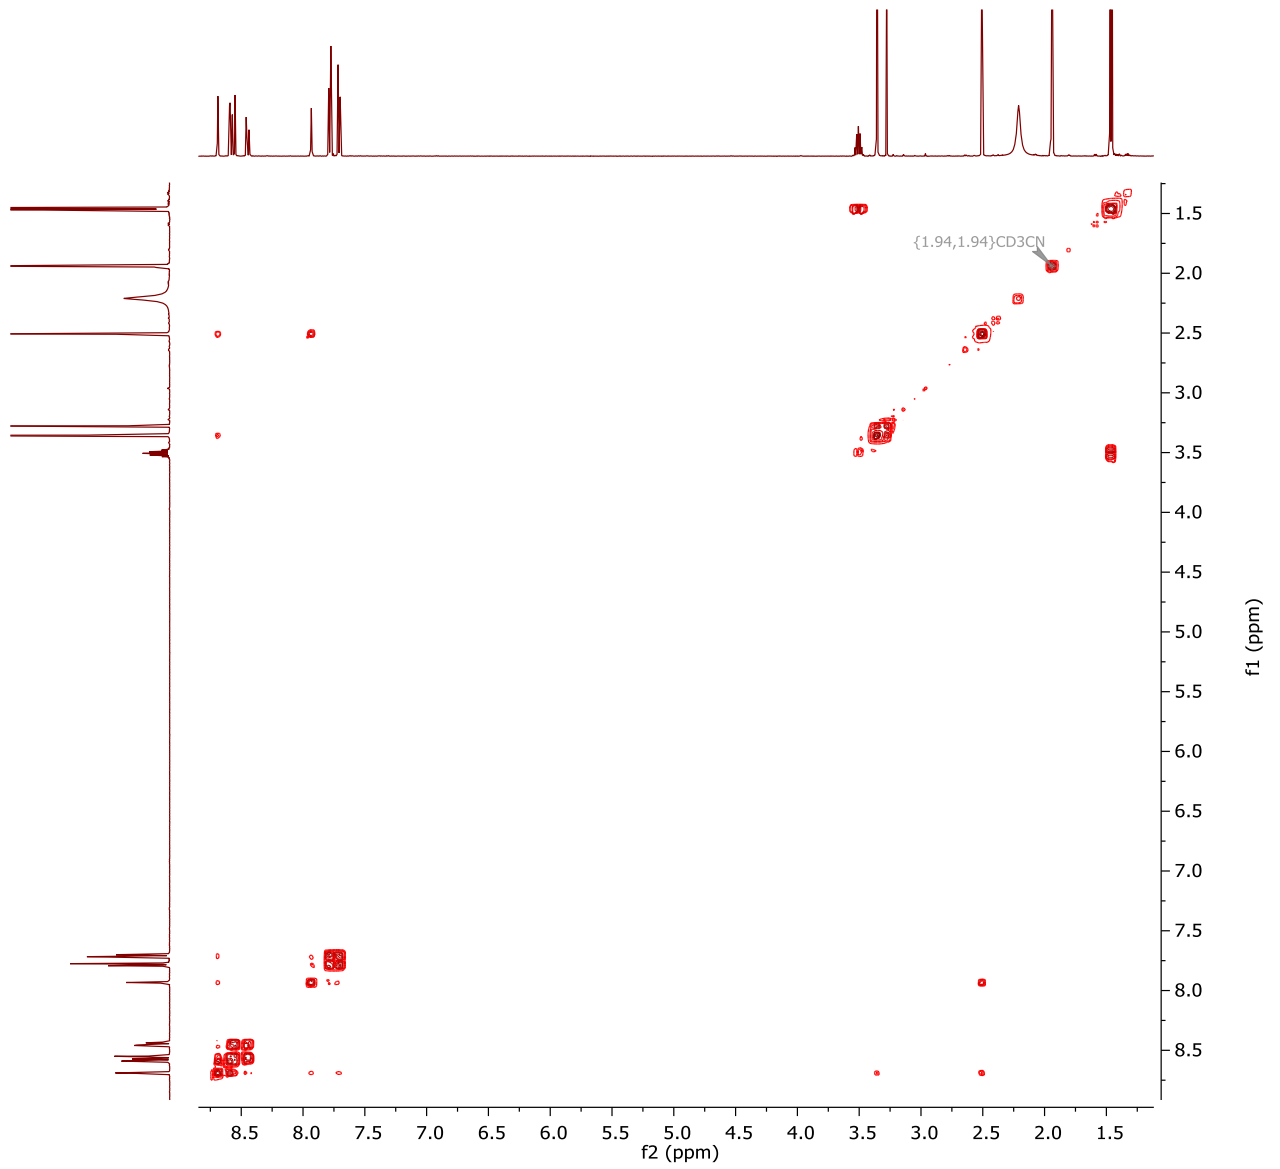

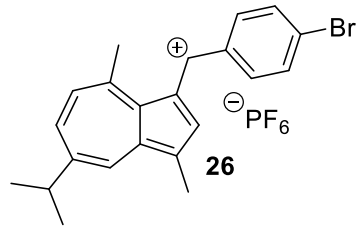

NOESY, CD<sub>3</sub>CN

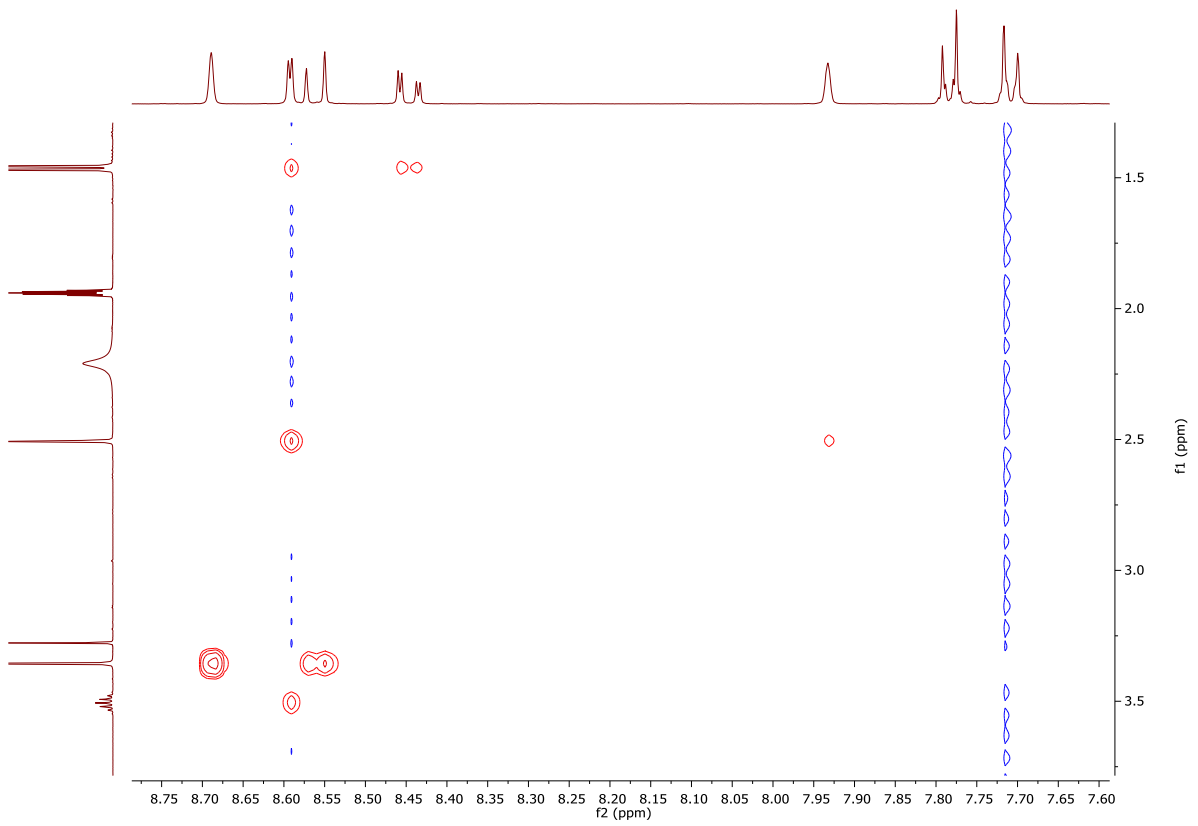

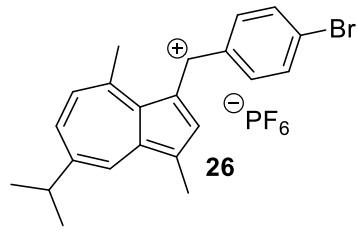

HSQC, CD<sub>3</sub>CN

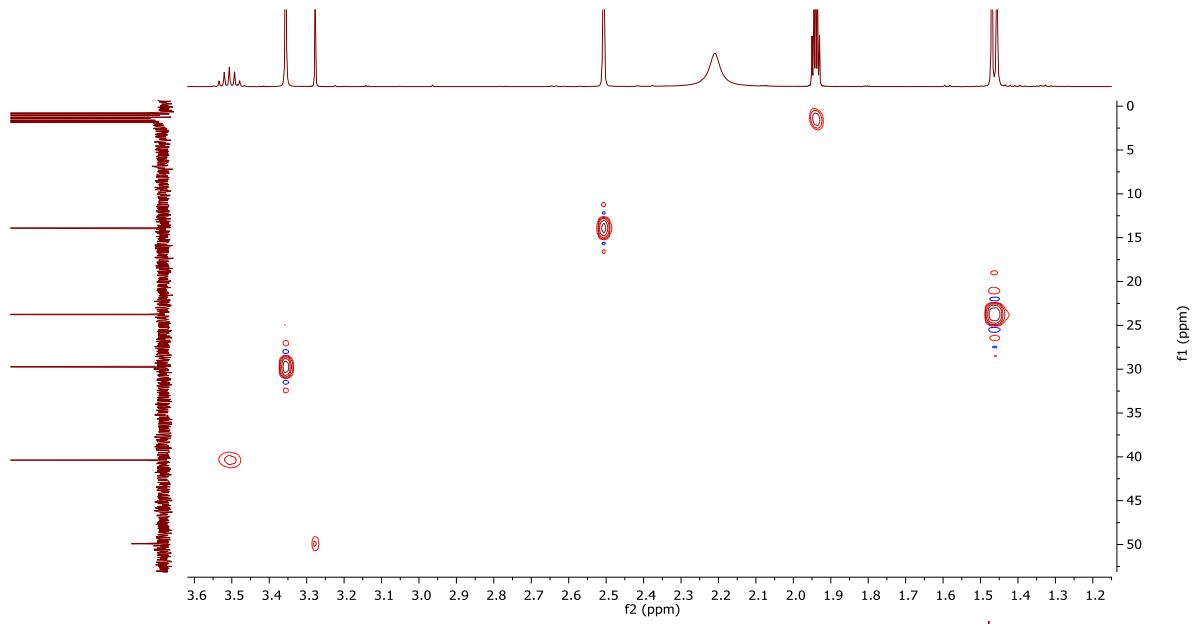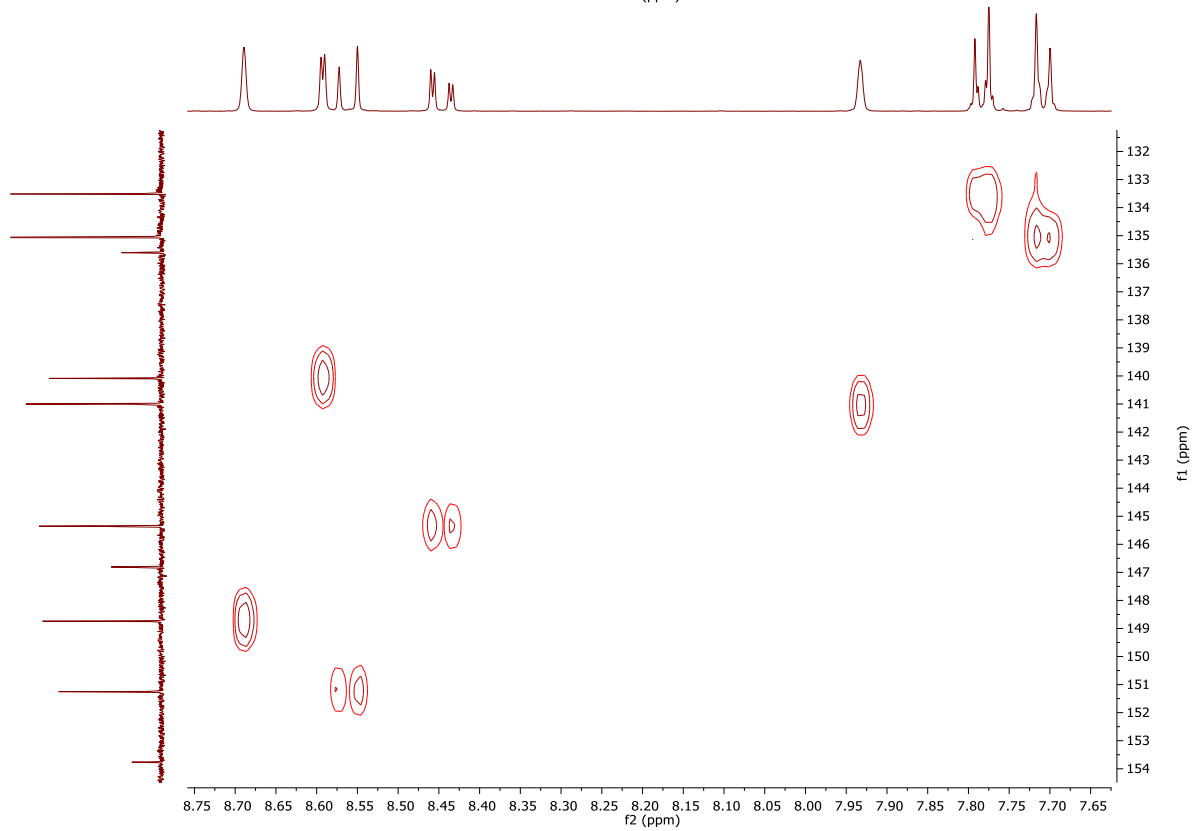

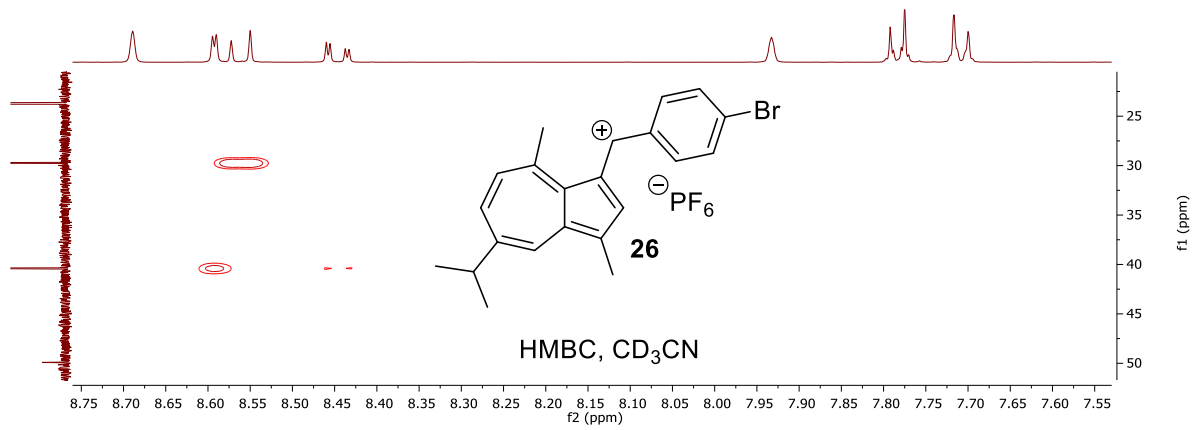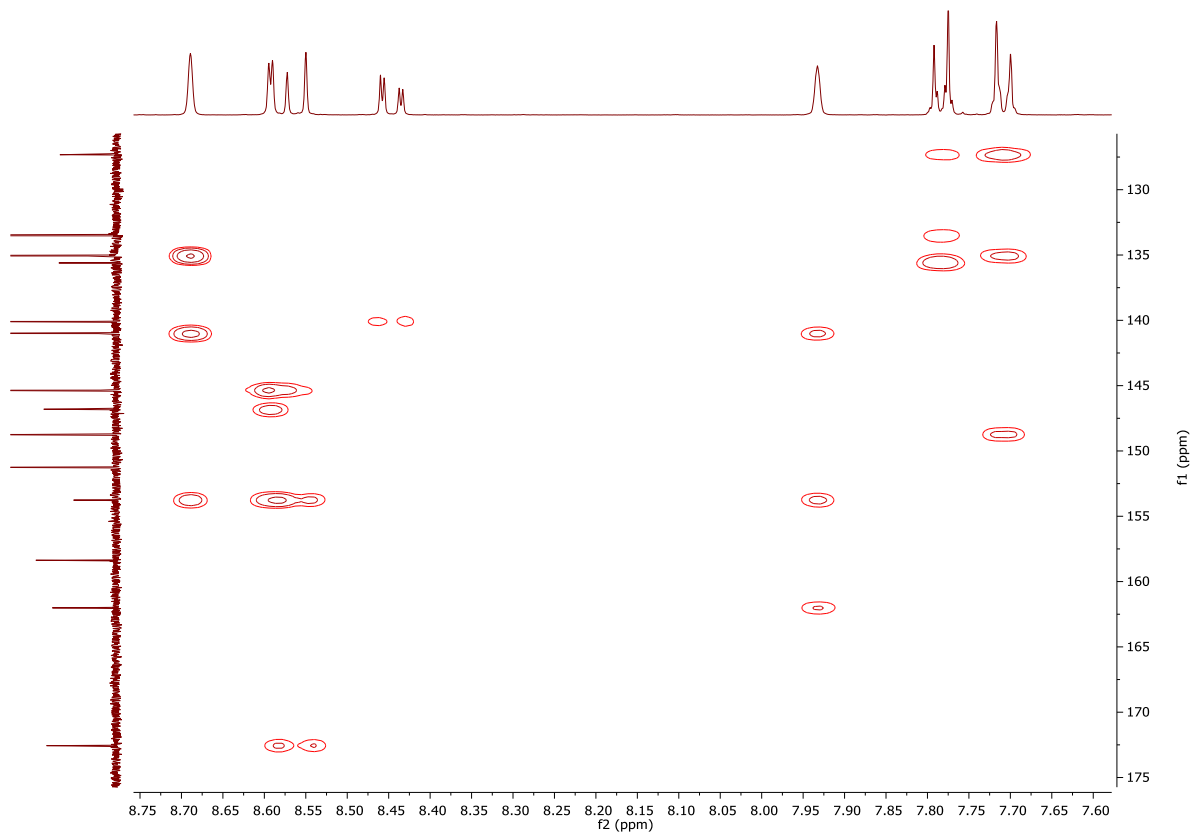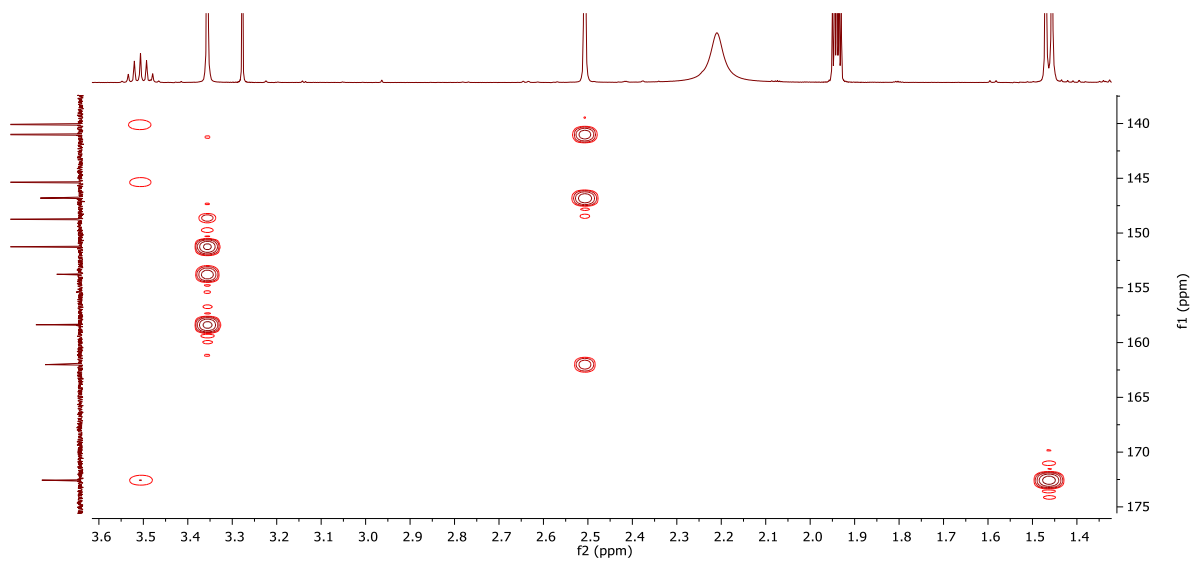

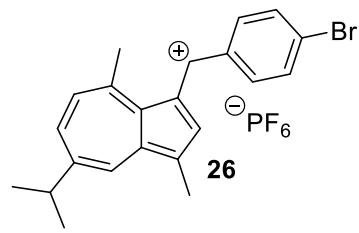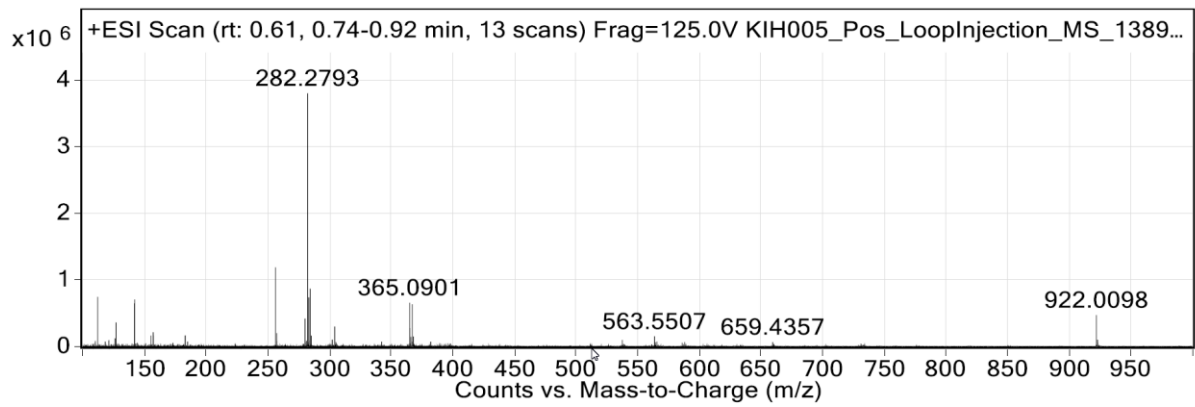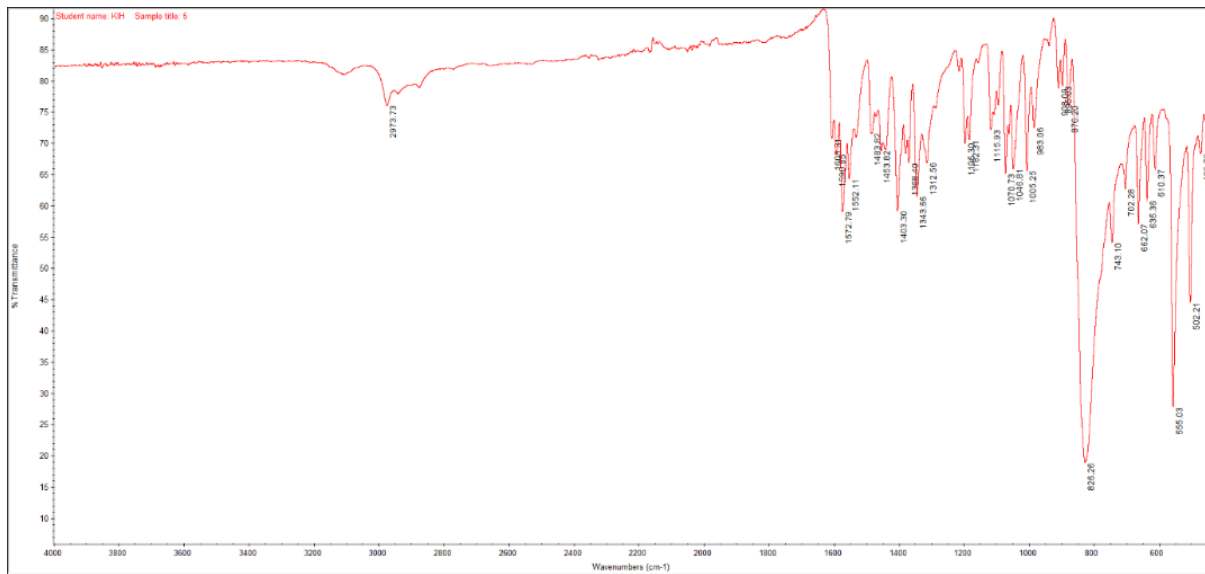

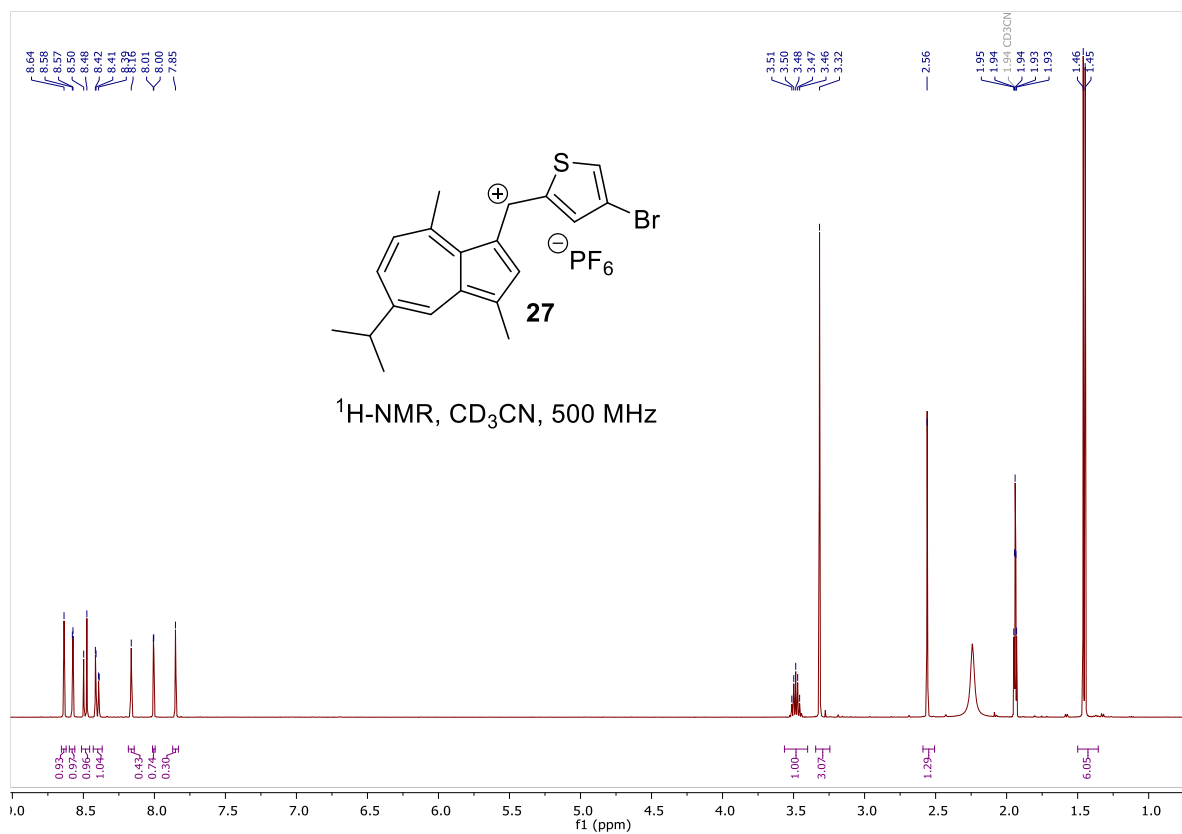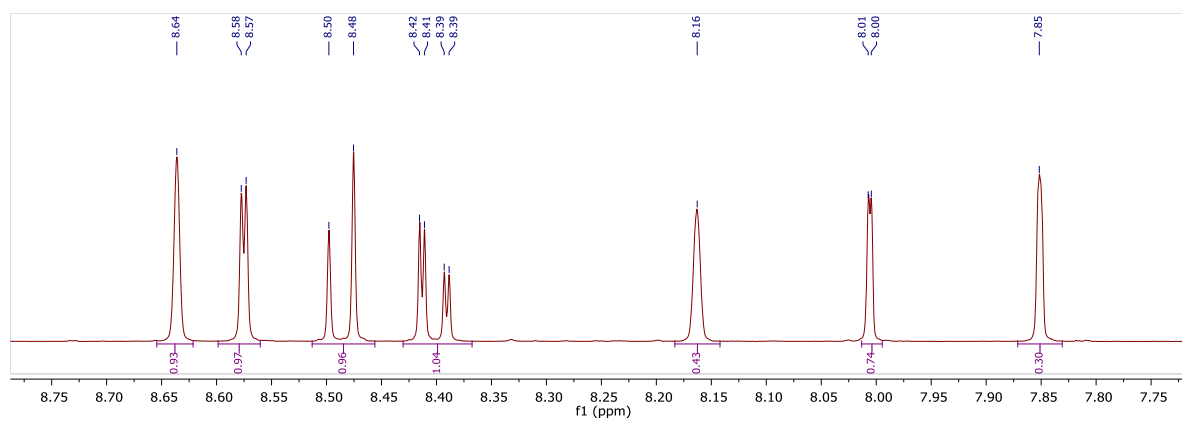

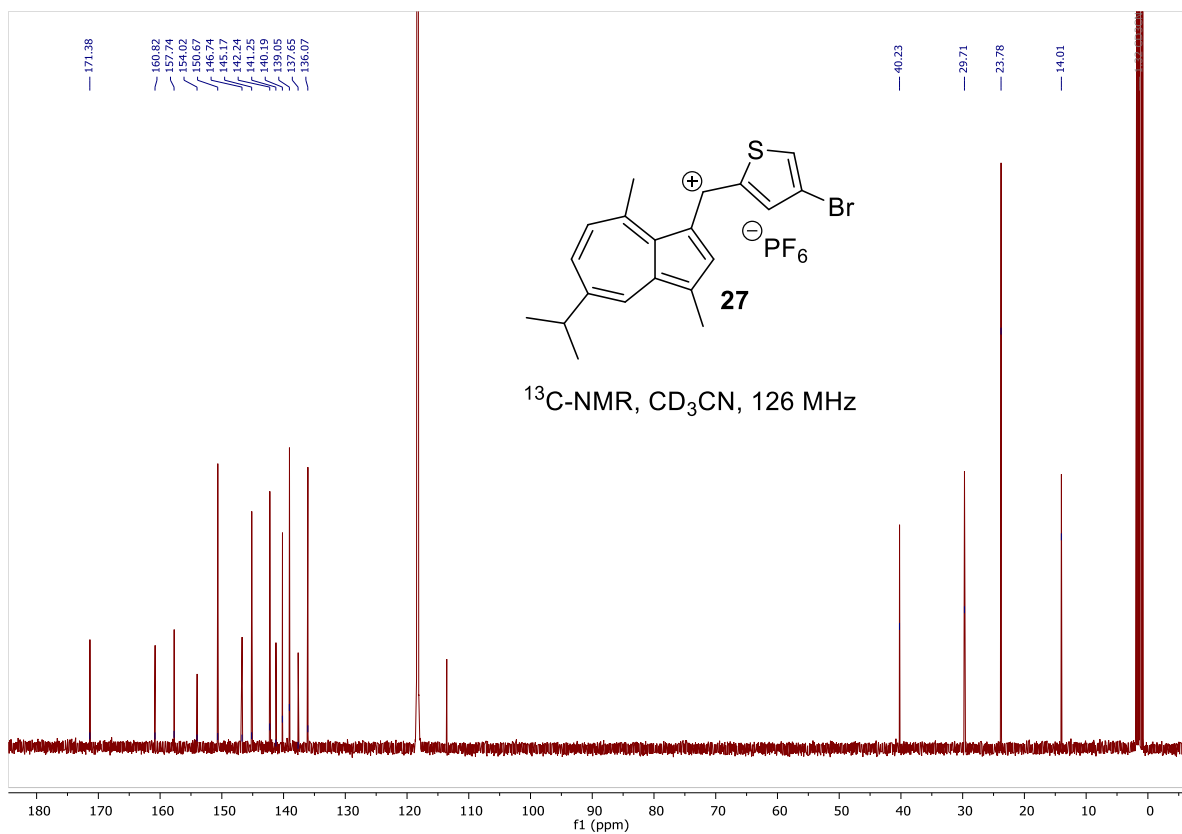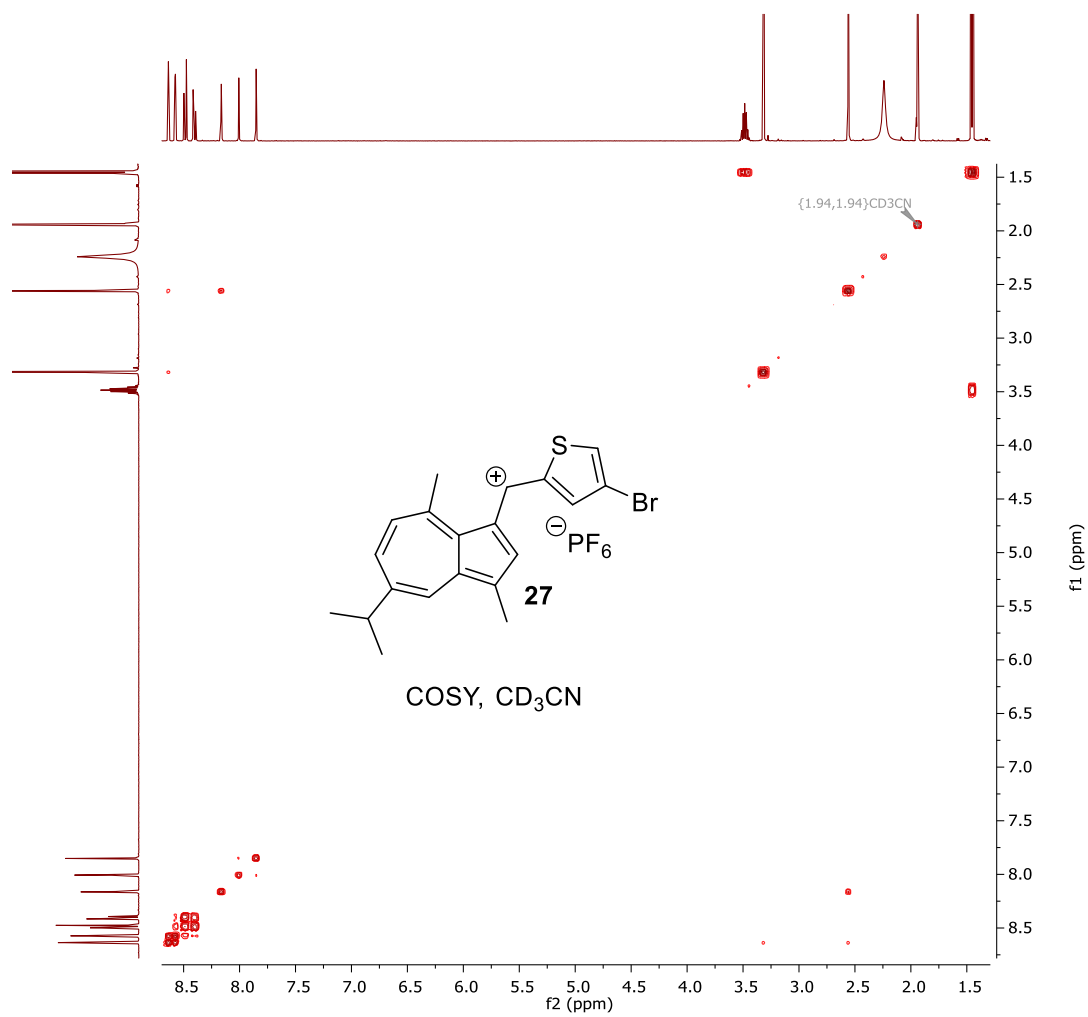

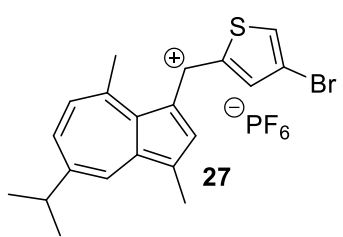

NOESY, CD<sub>3</sub>CN

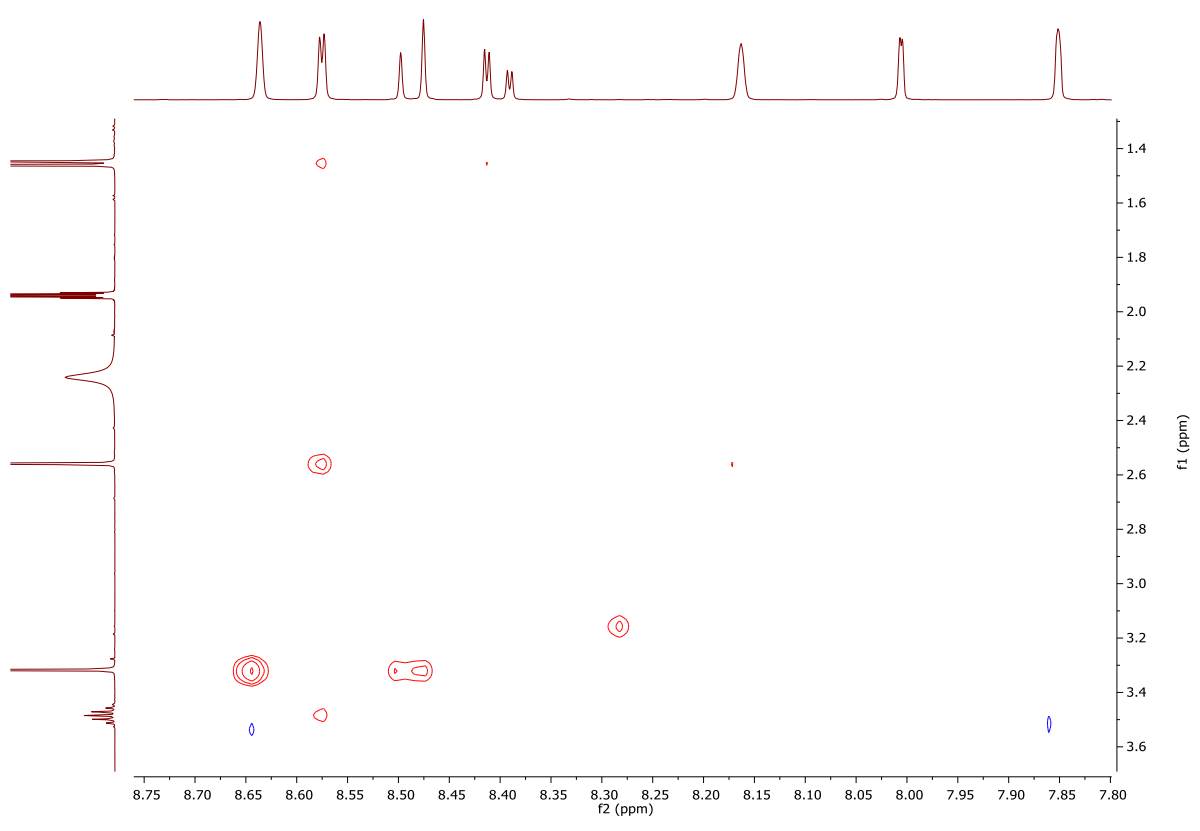



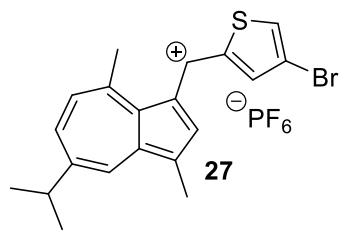

HSQC, CD<sub>3</sub>CN

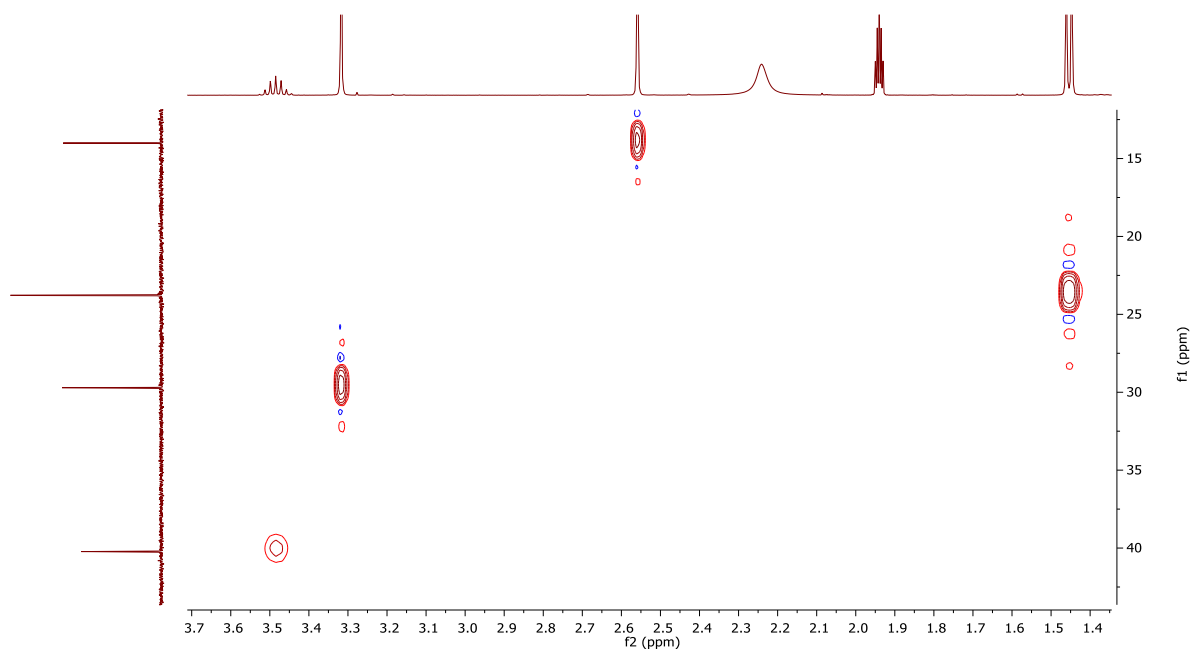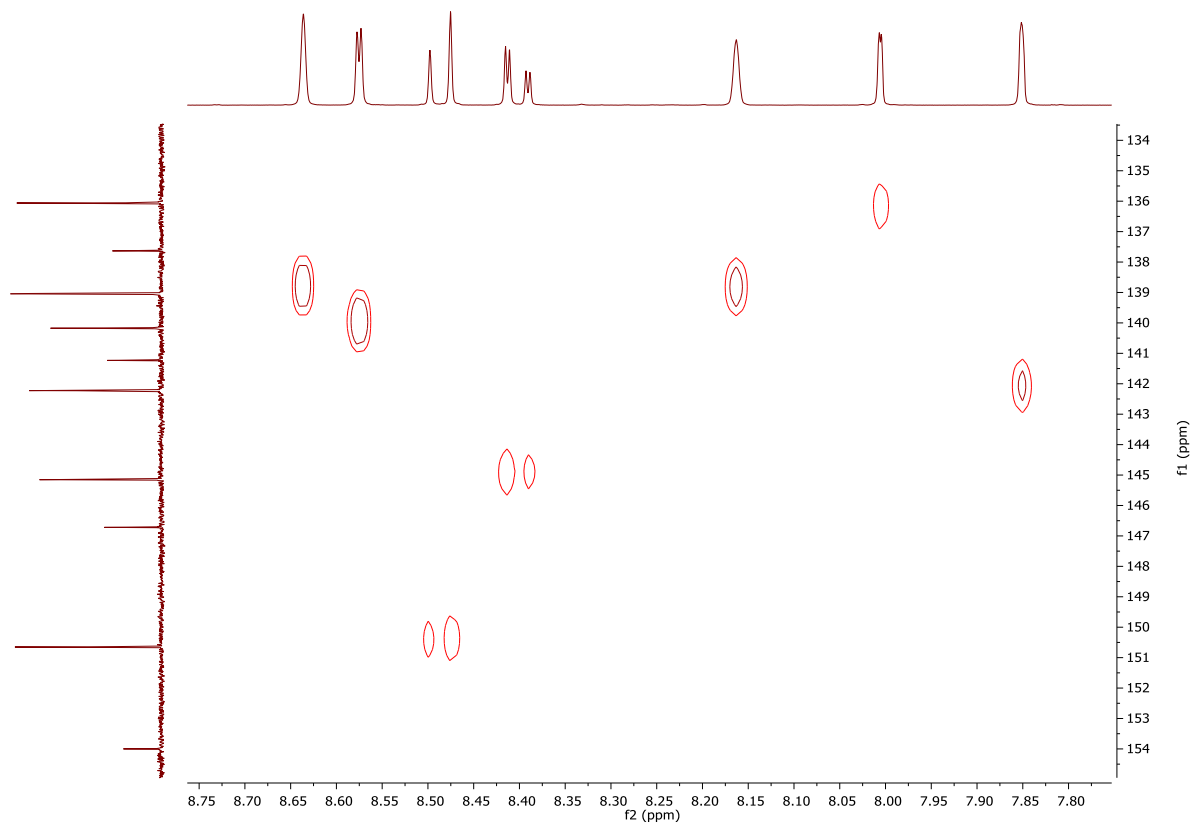

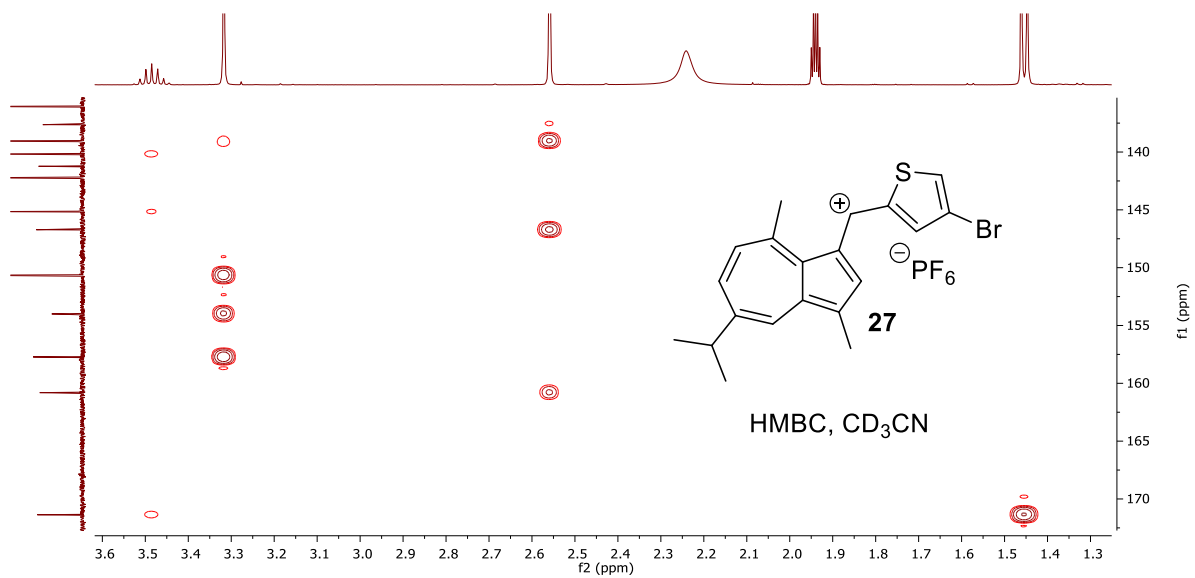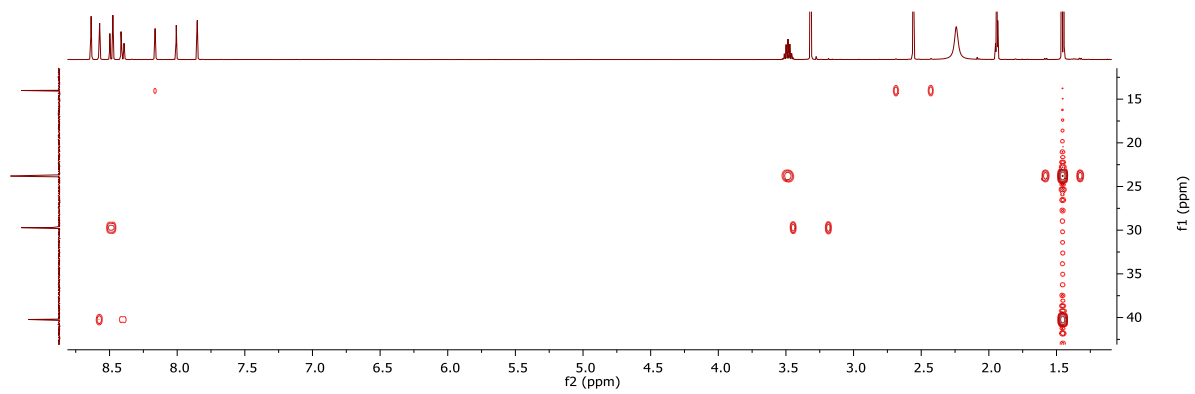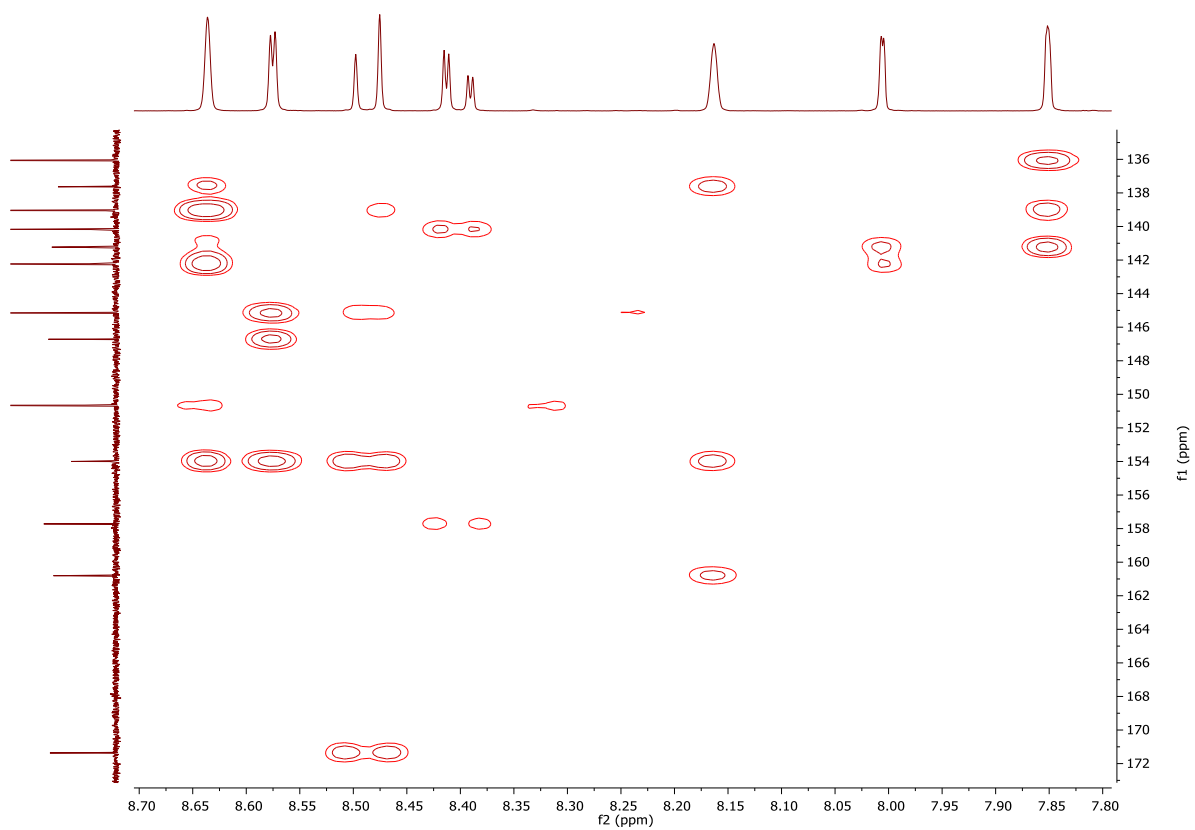

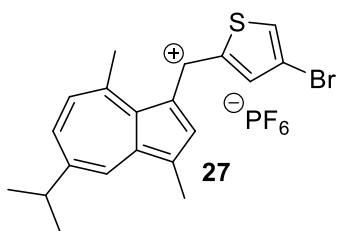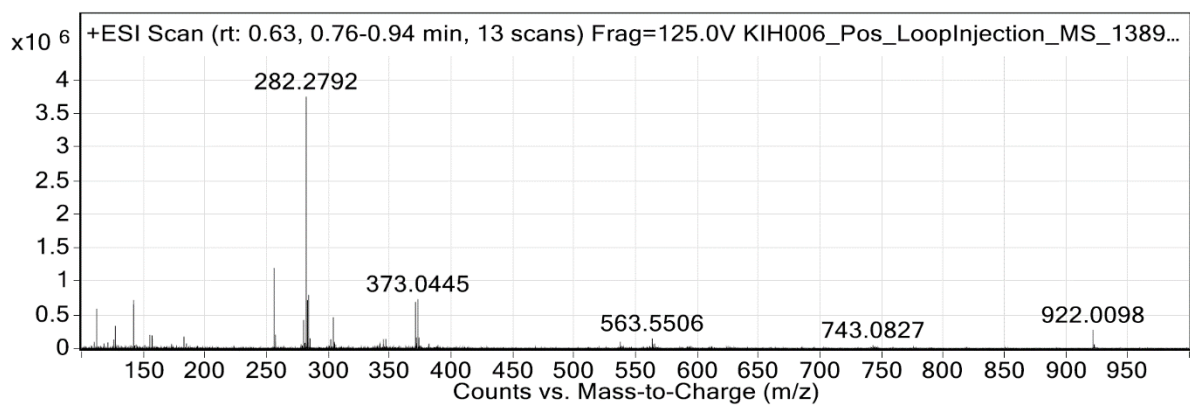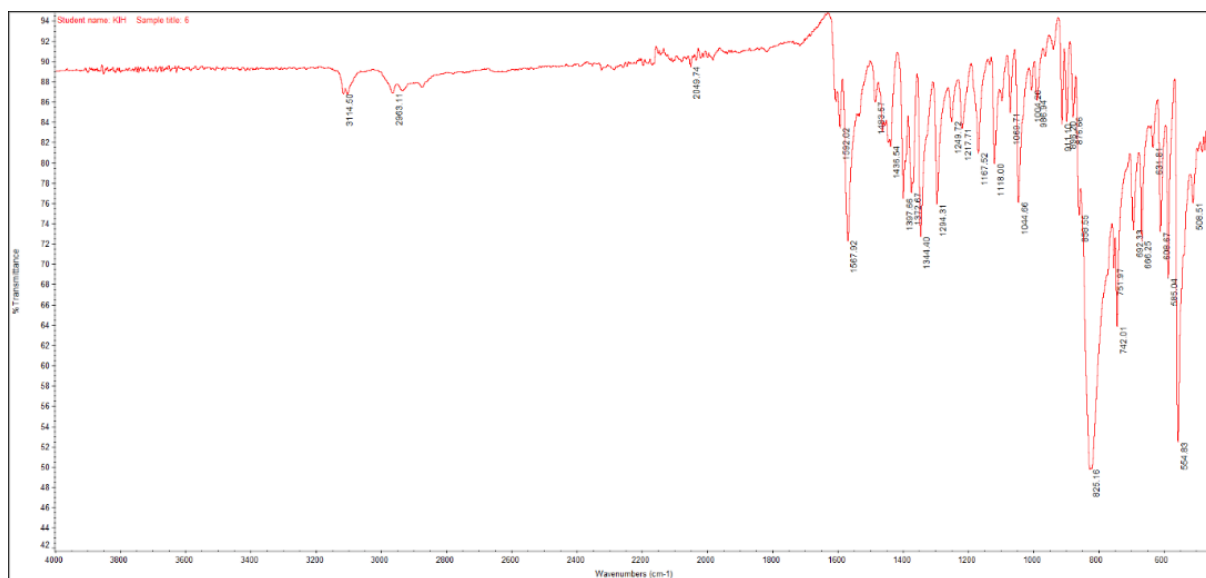

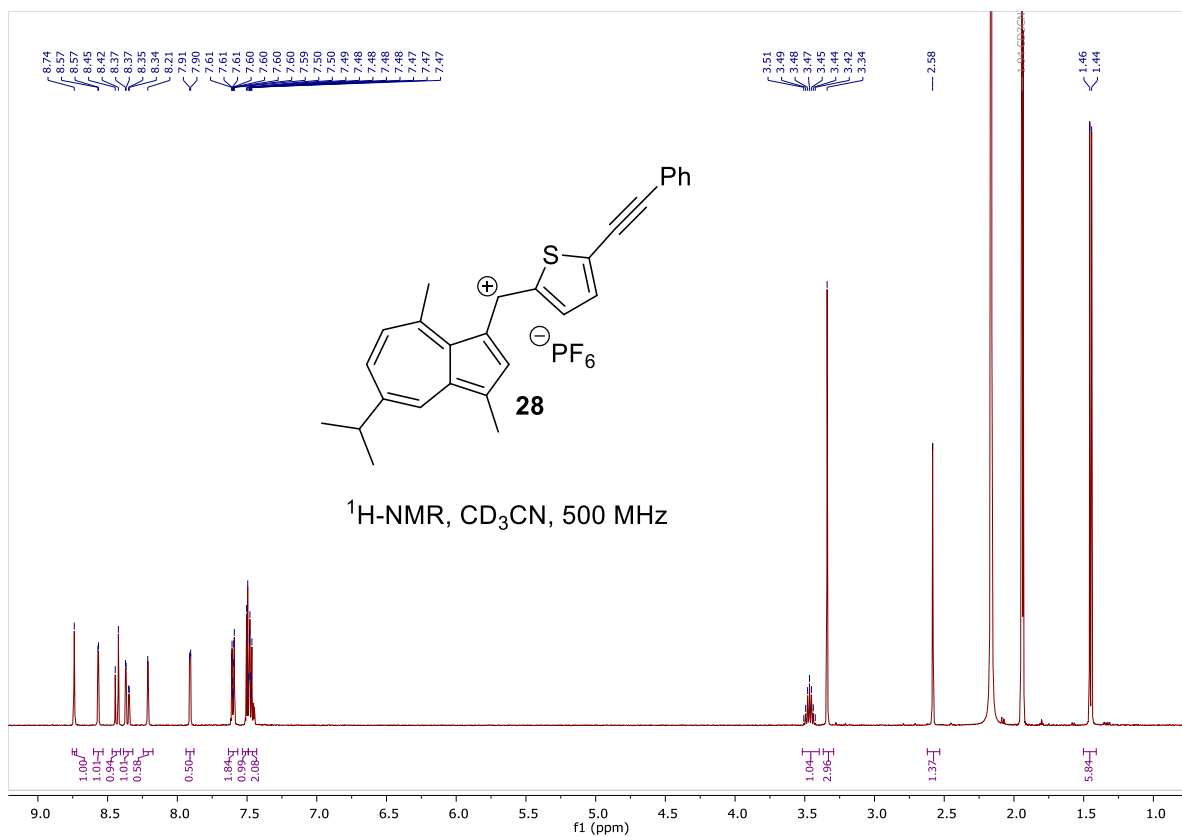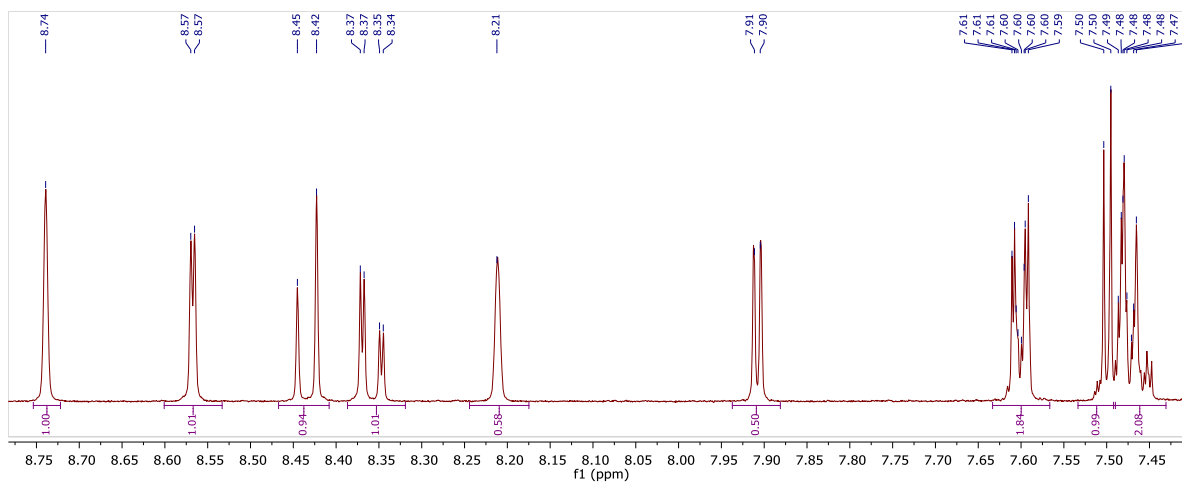

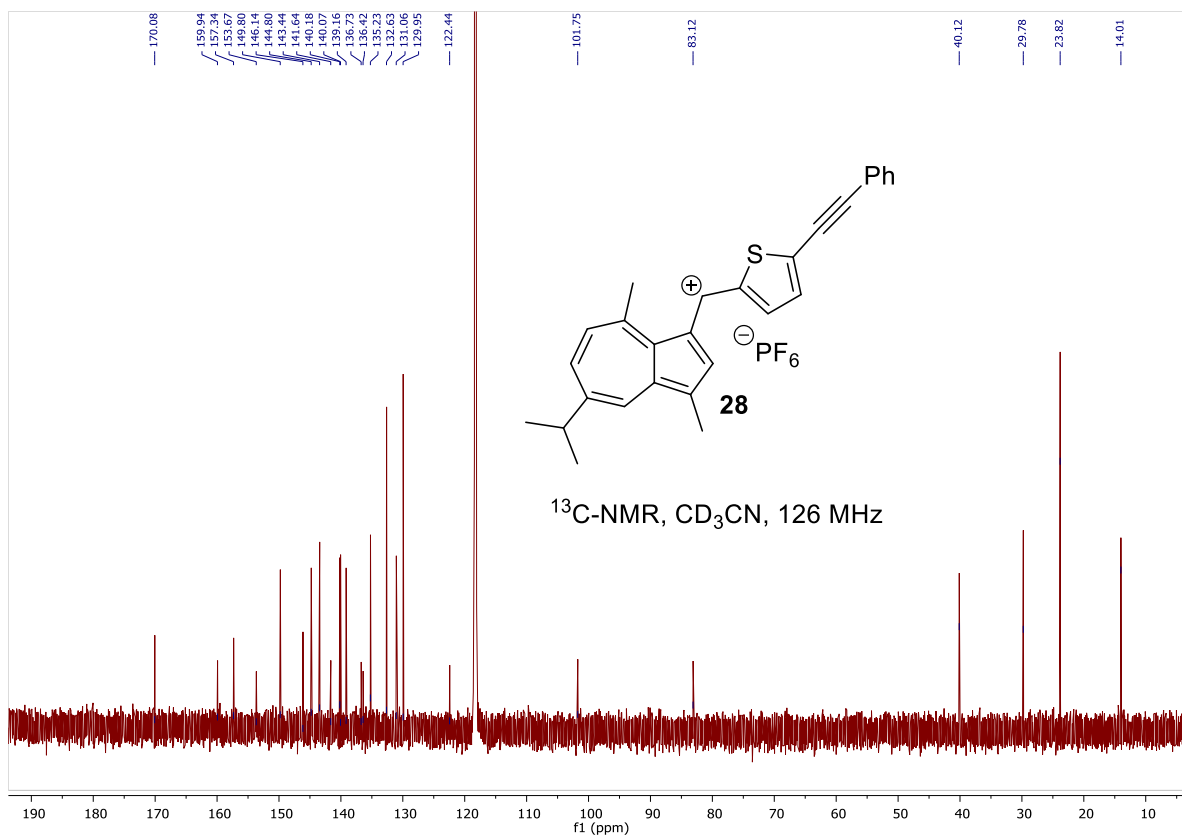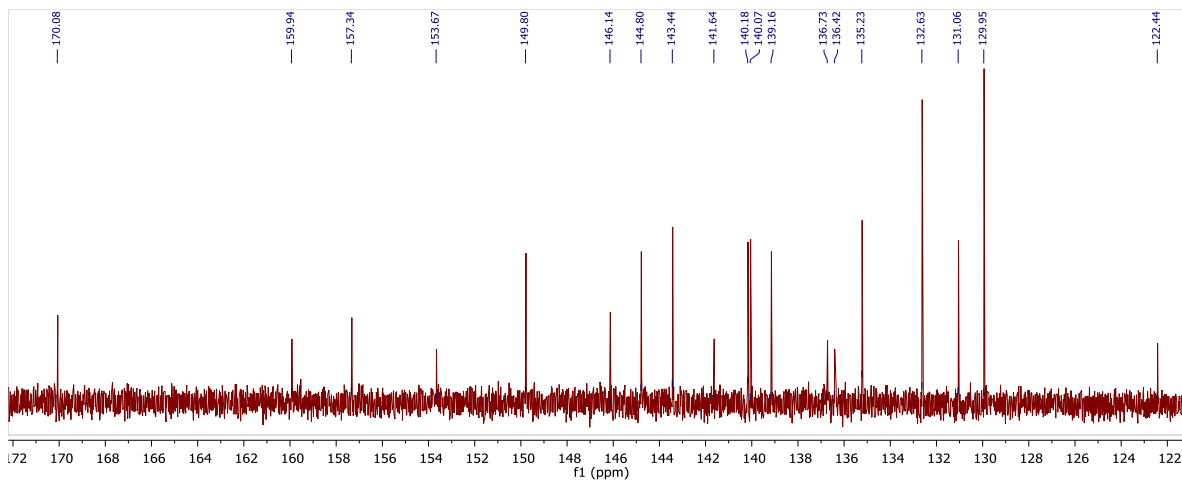

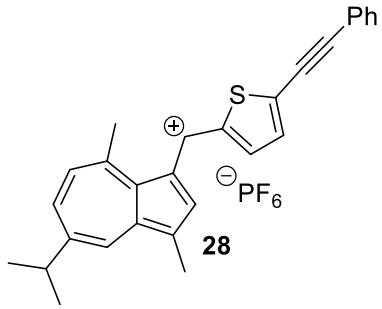

COSY, CD<sub>3</sub>CN

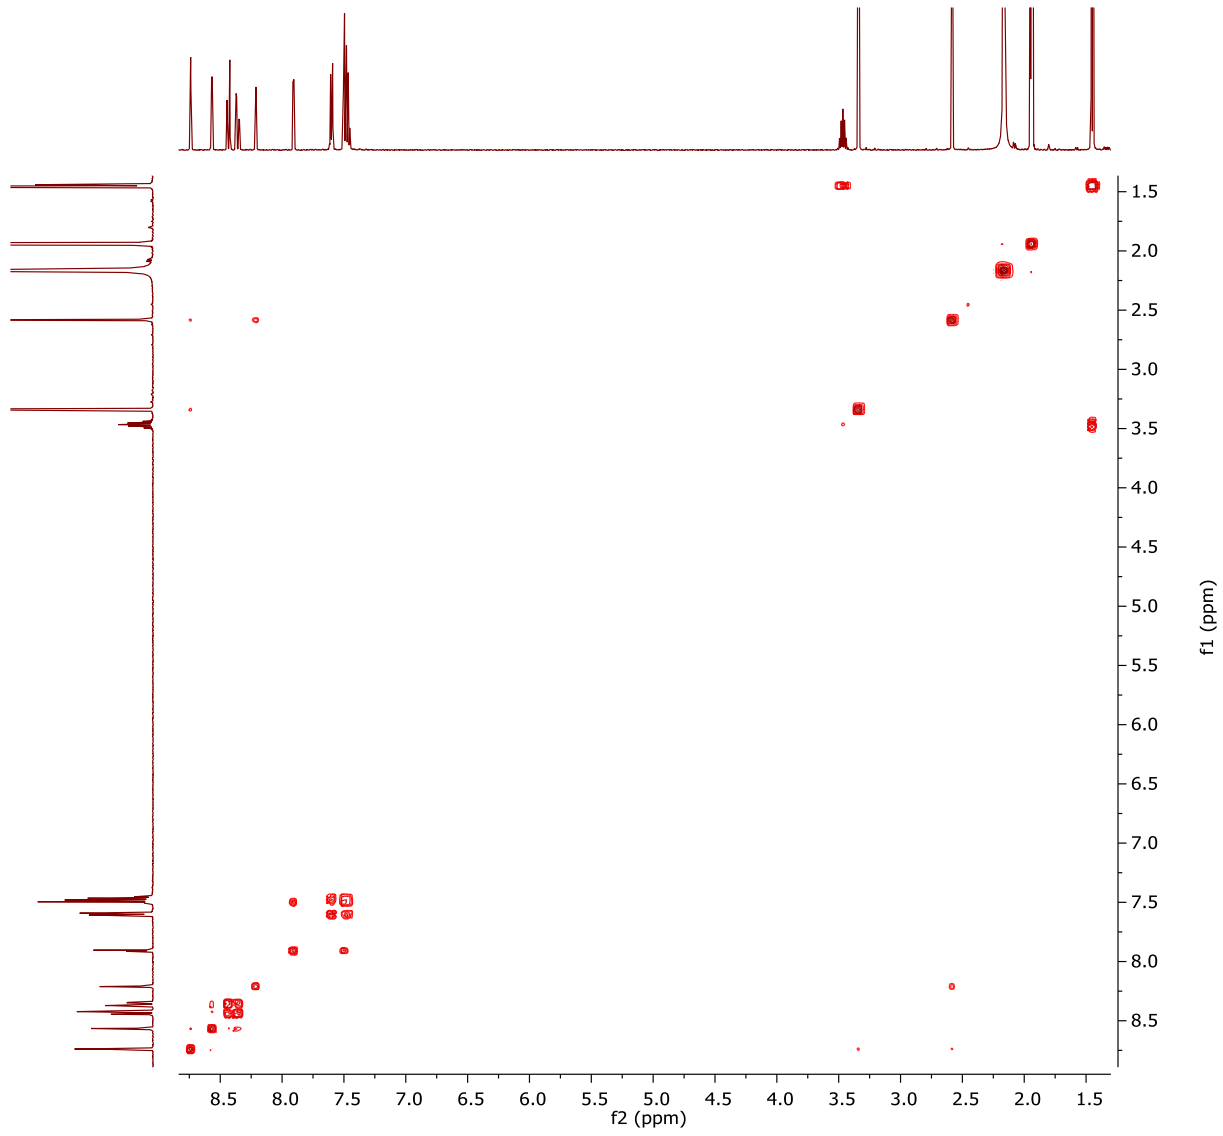

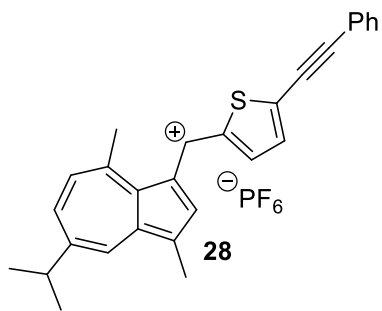

NOESY, CD<sub>3</sub>CN

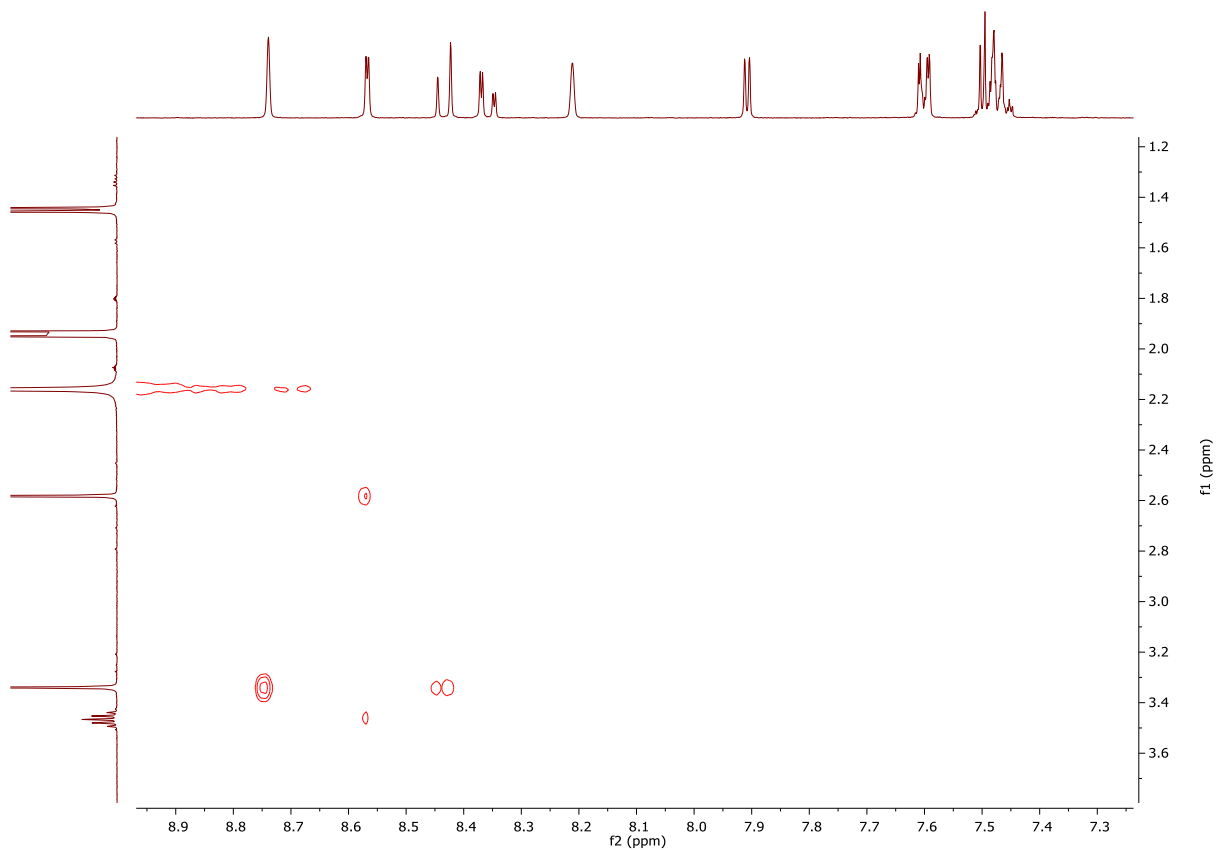

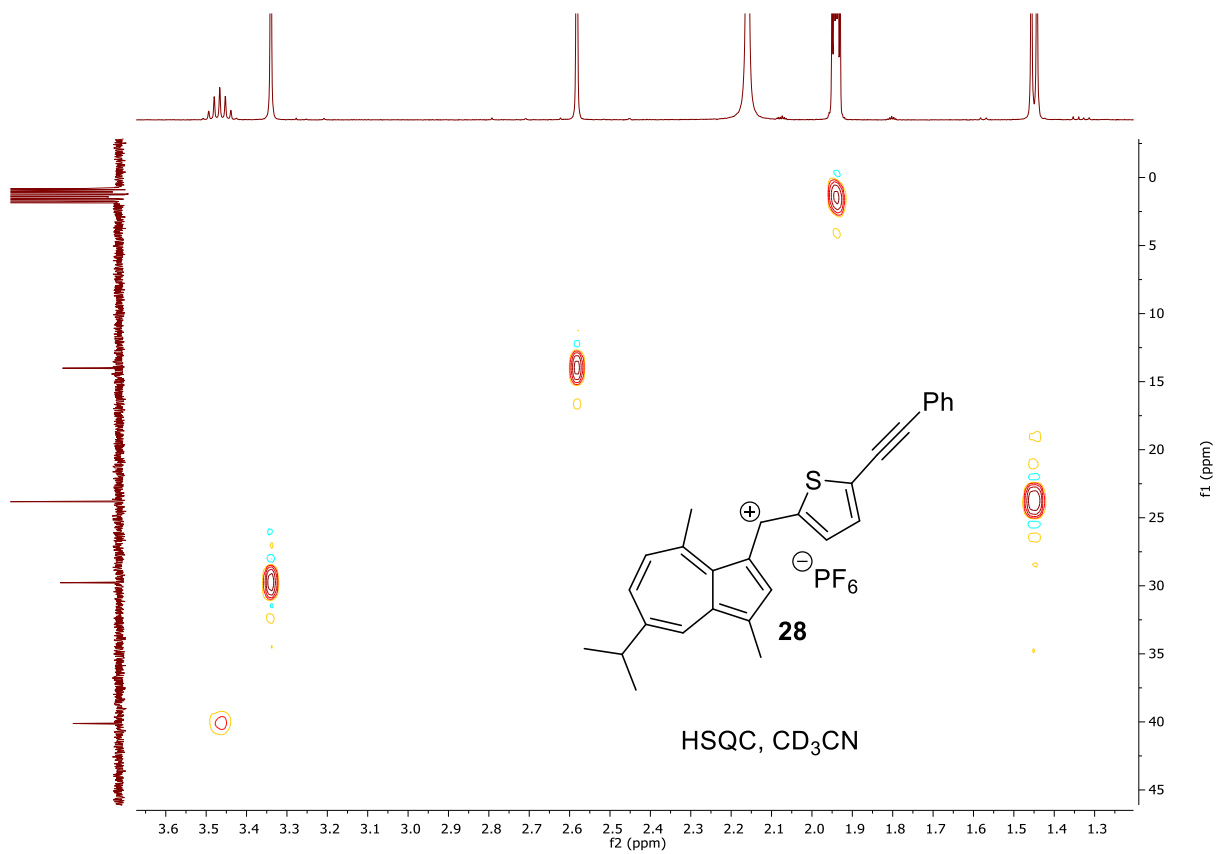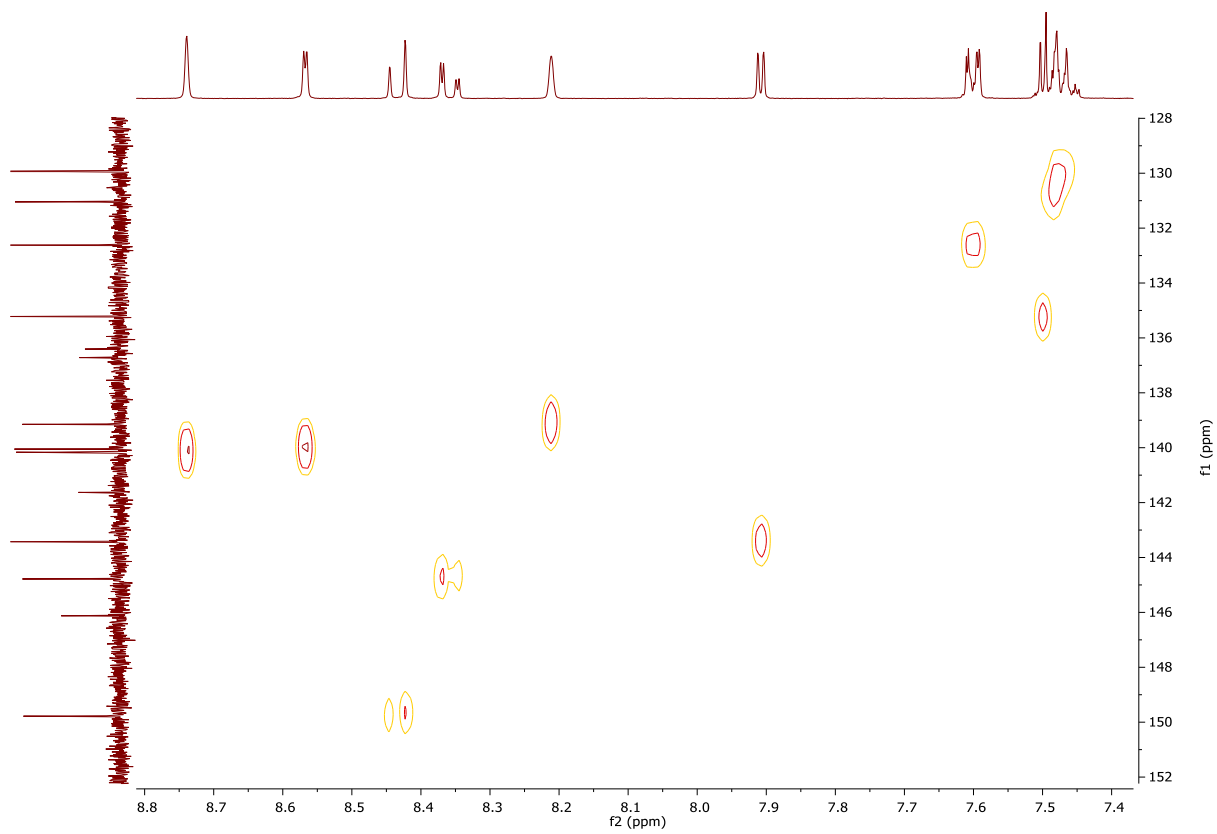



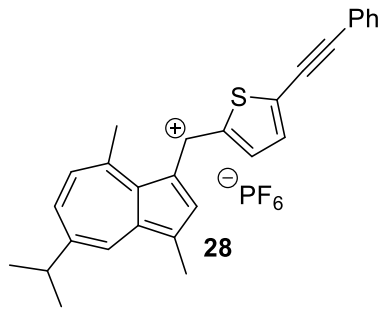

HMBC, CD<sub>3</sub>CN

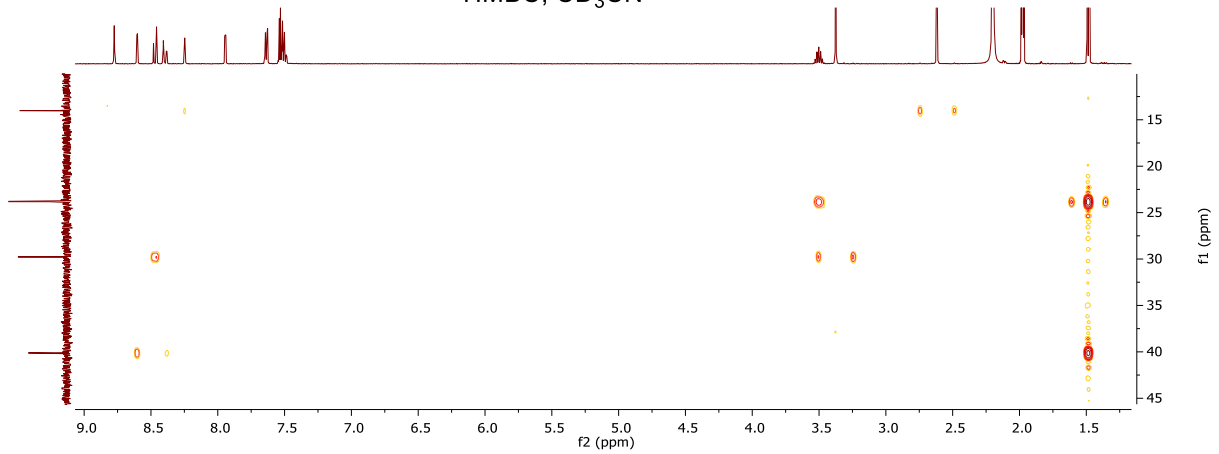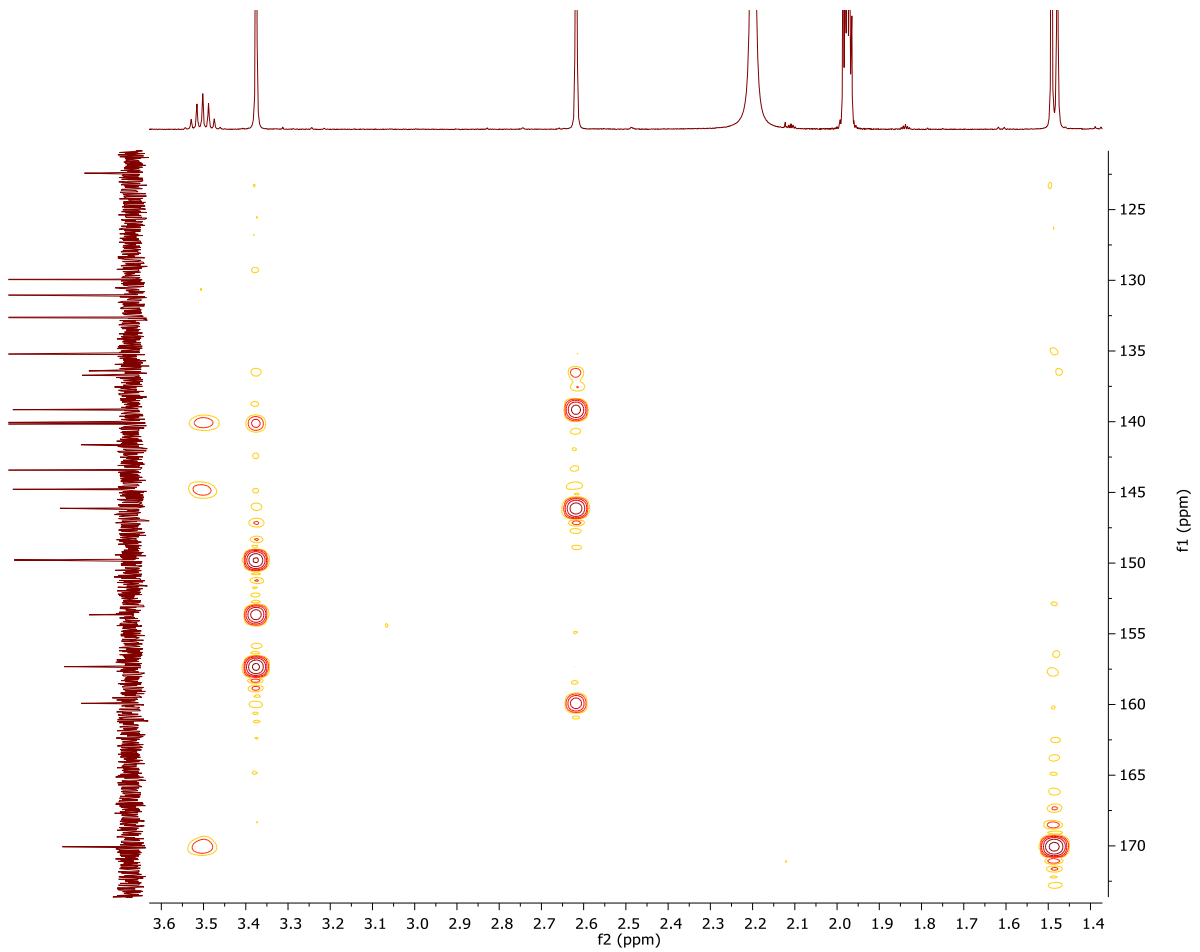

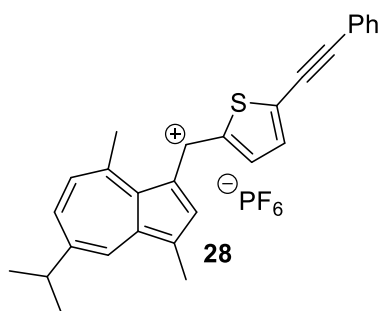

HMBC, CD<sub>3</sub>CN

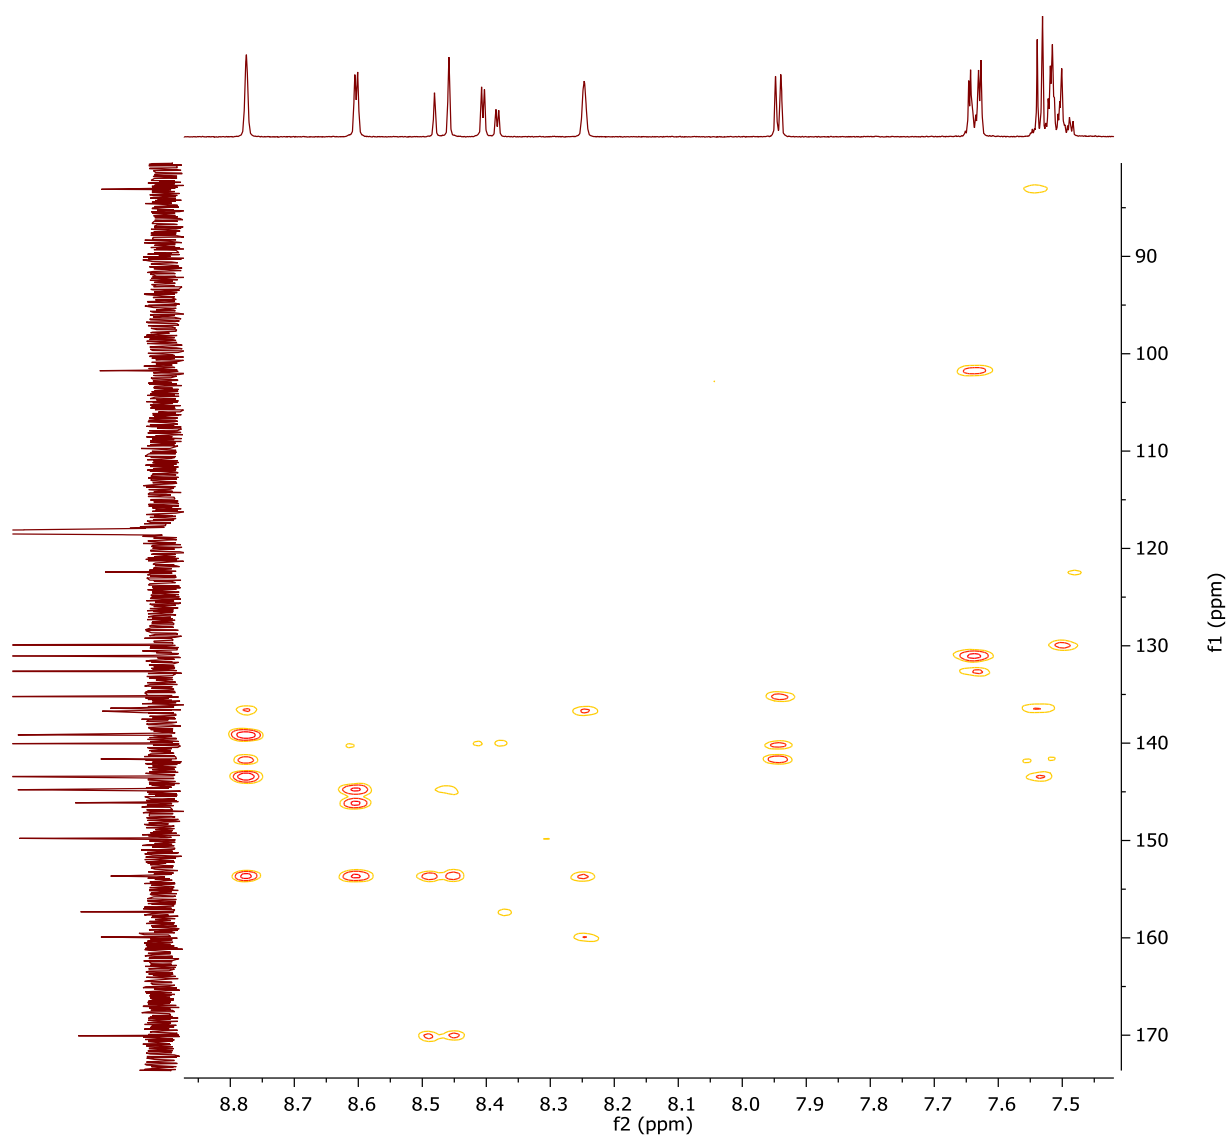

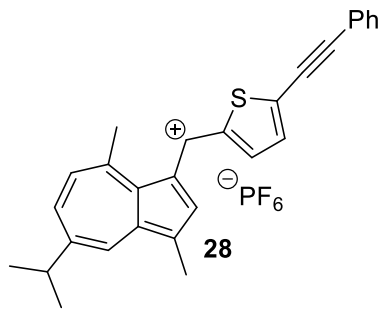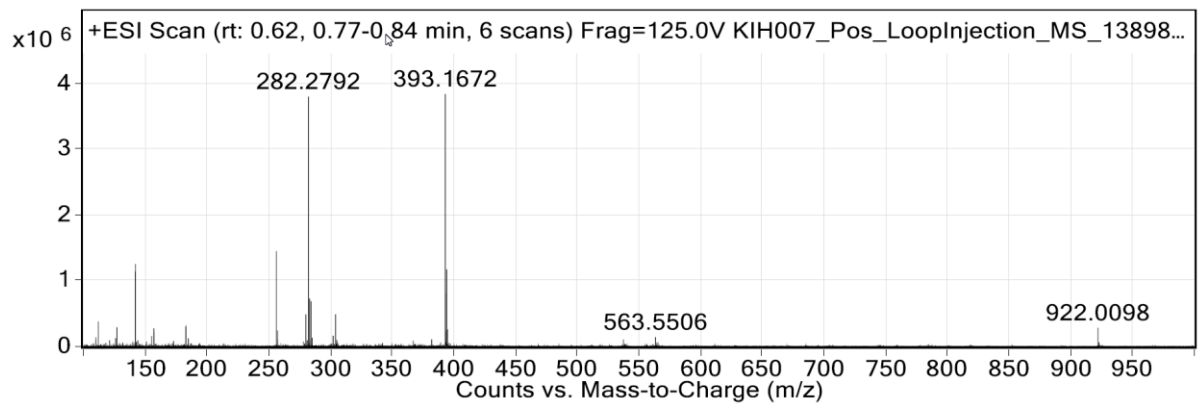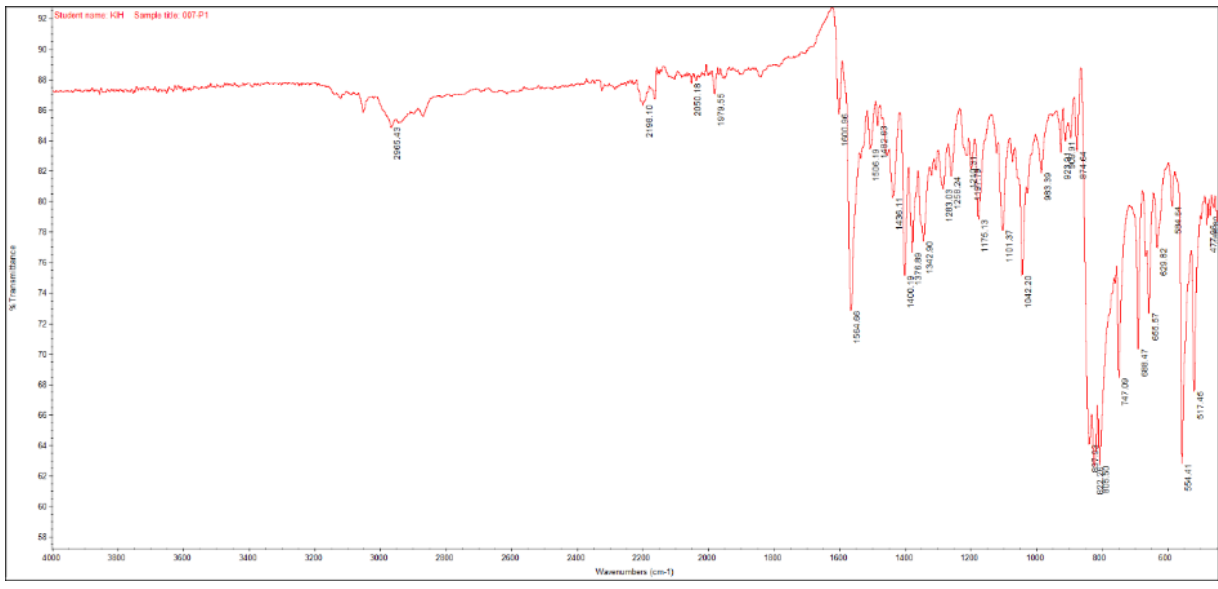

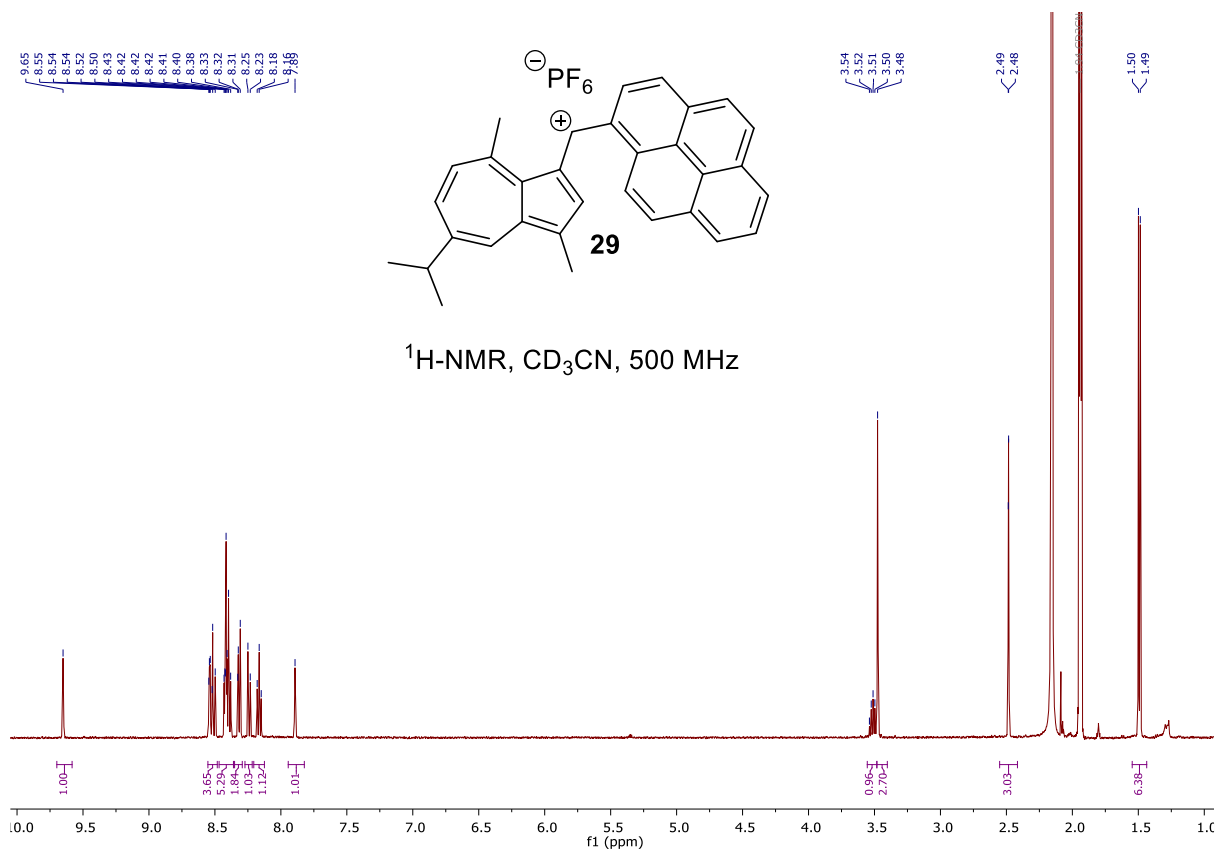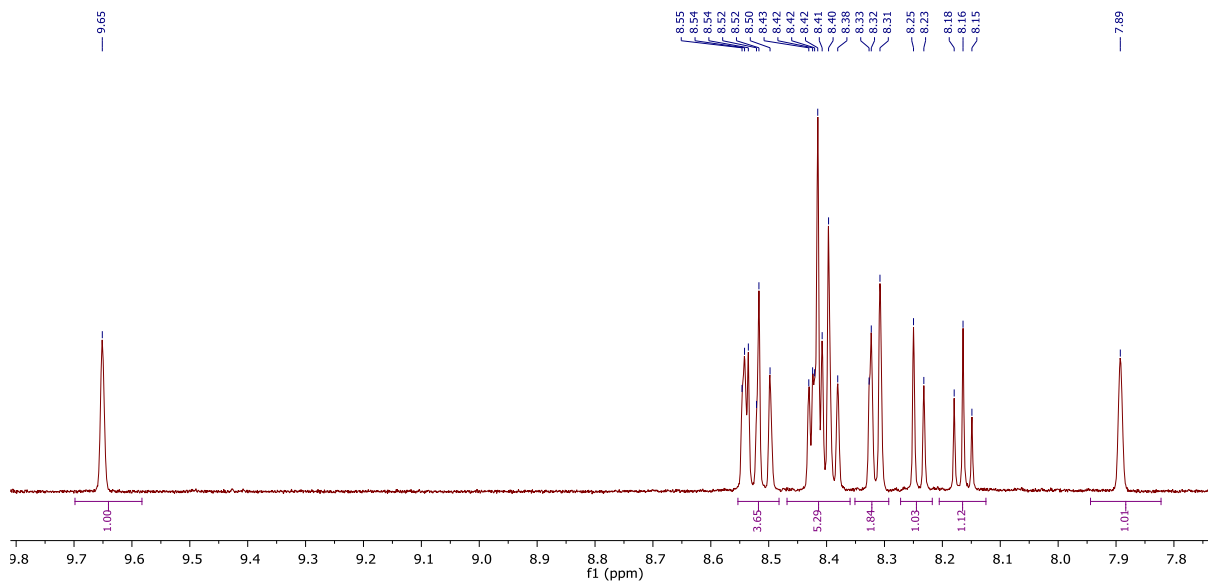

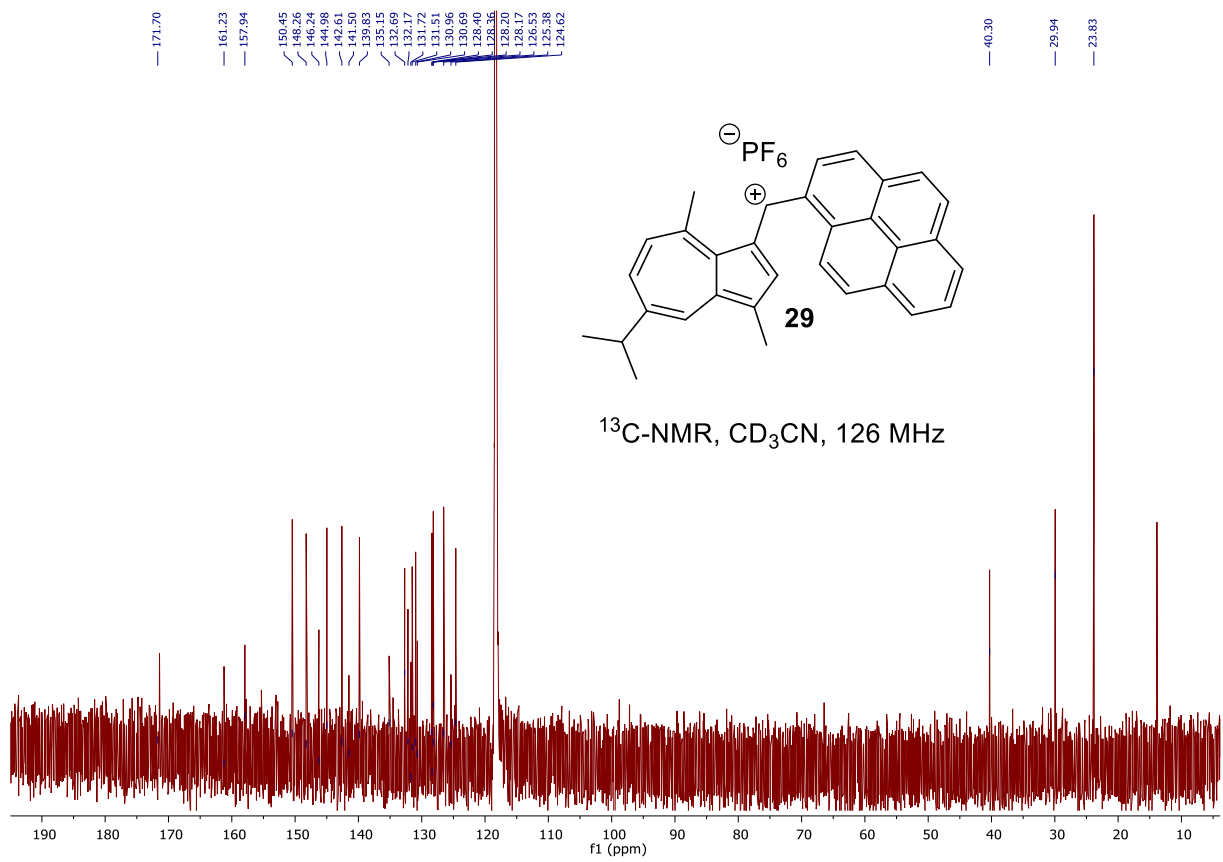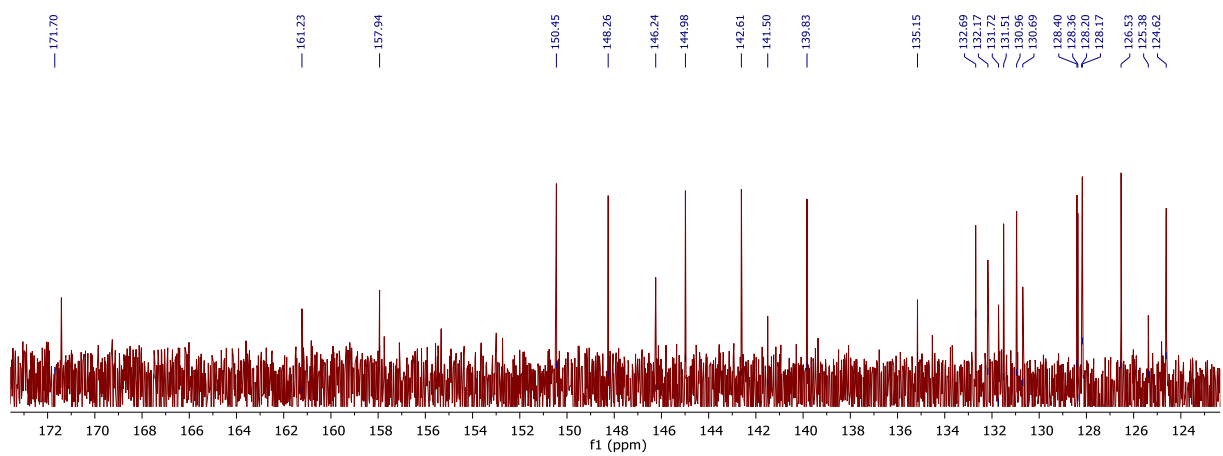

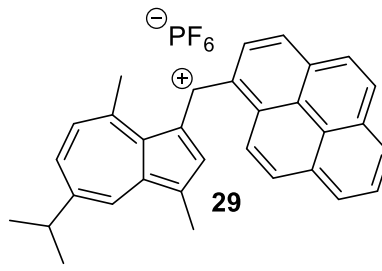

COSY, CD<sub>3</sub>CN

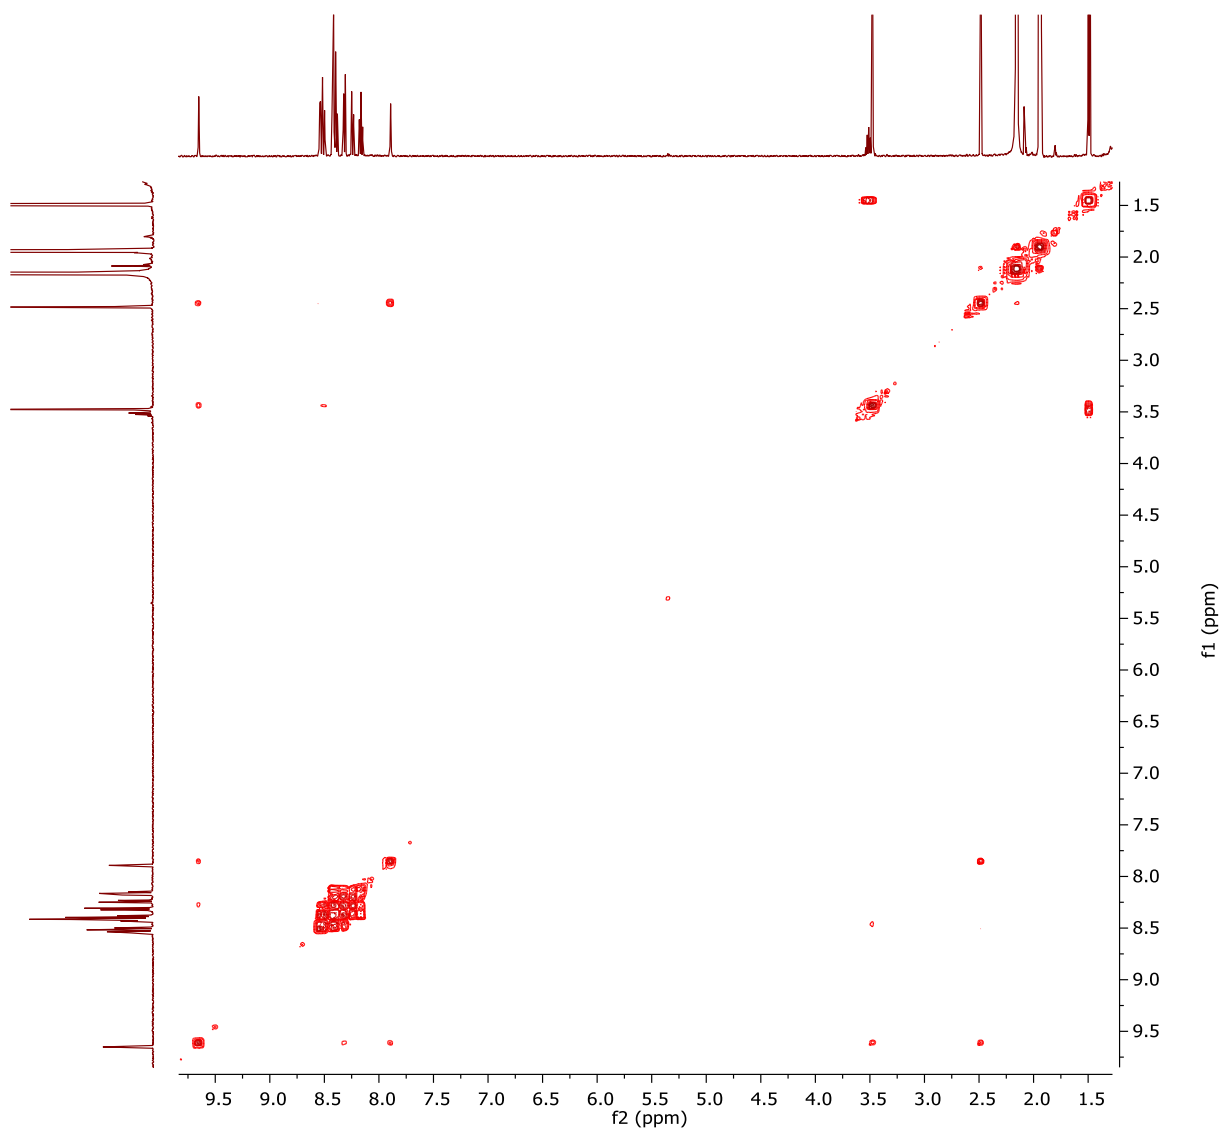

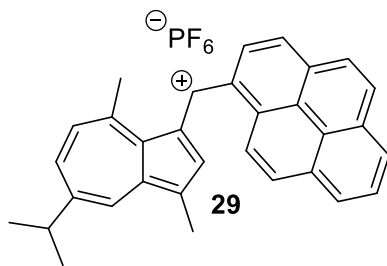

NOESY, CD<sub>3</sub>CN

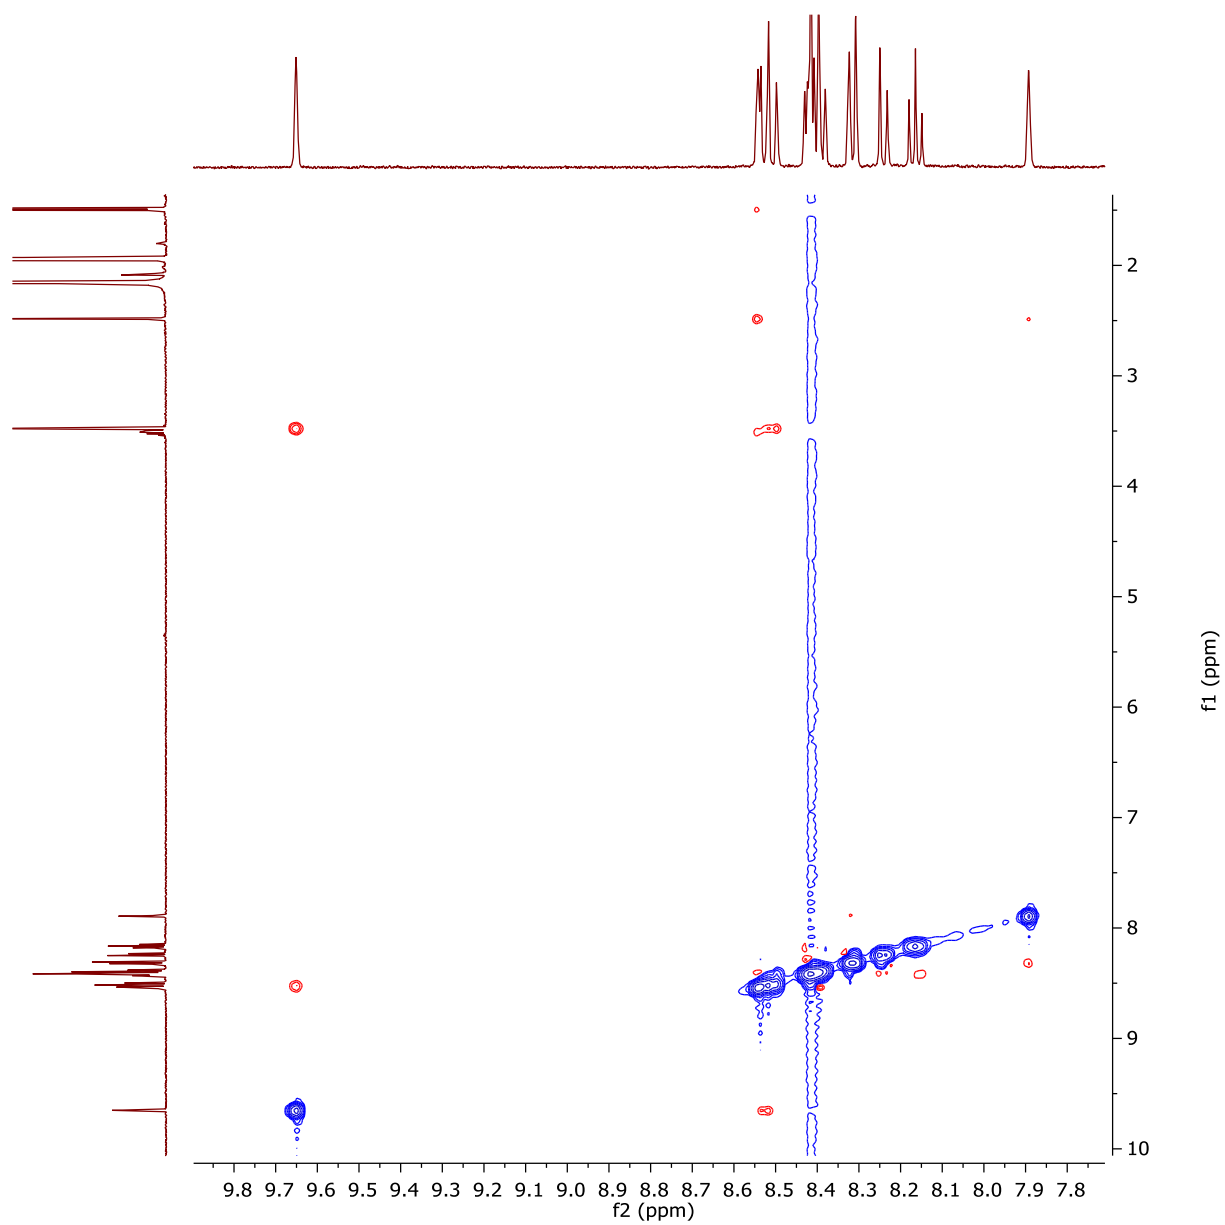

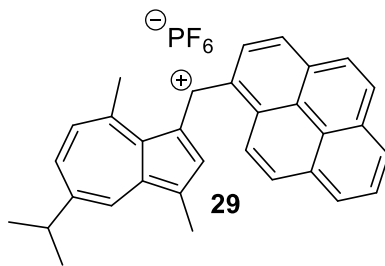

HSQC,  $\text{CD}_3\text{CN}$

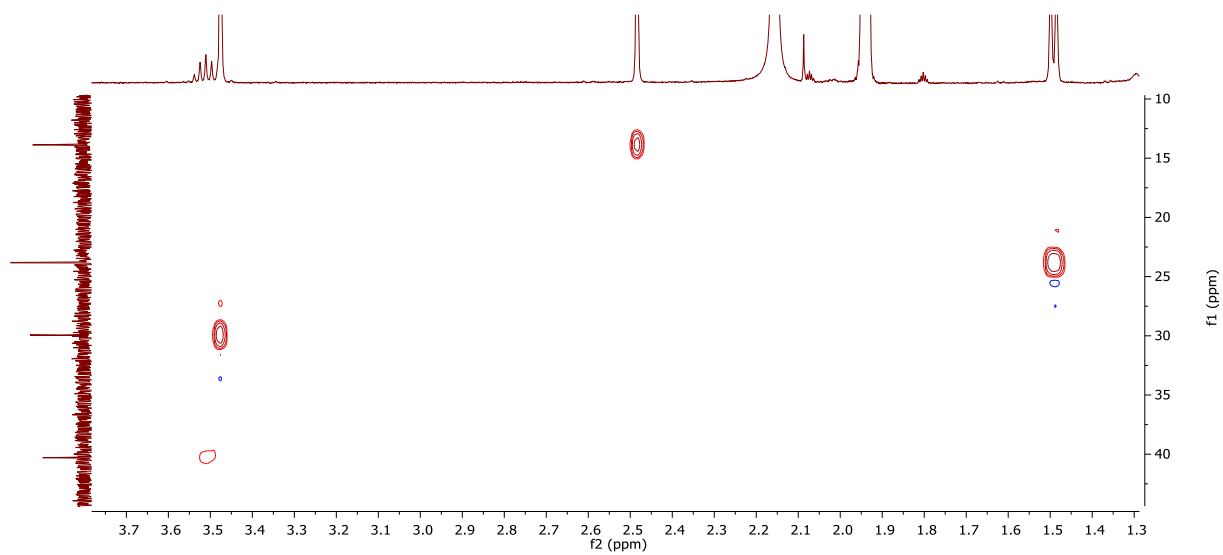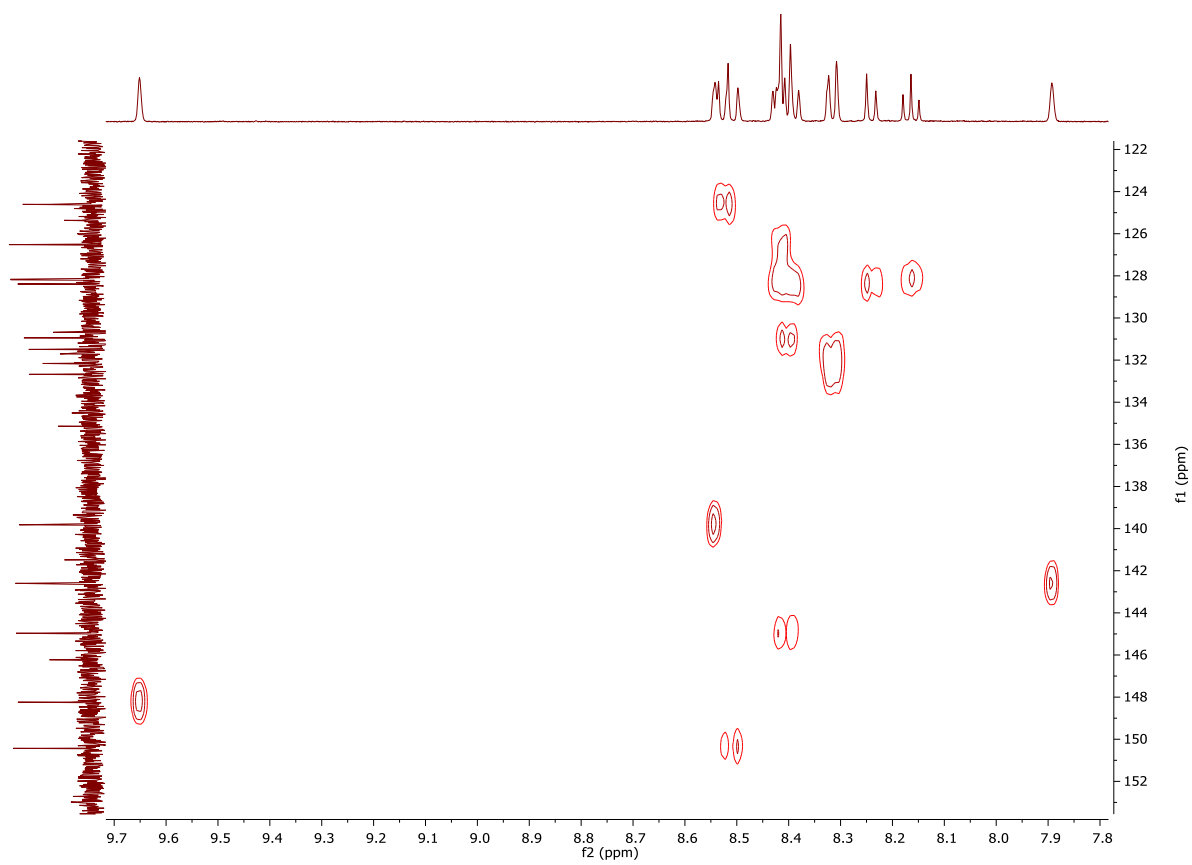



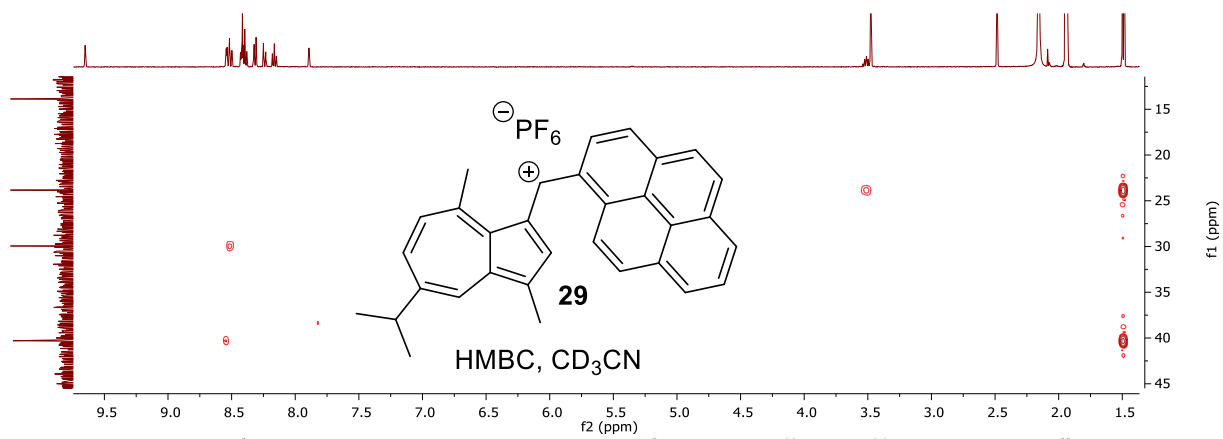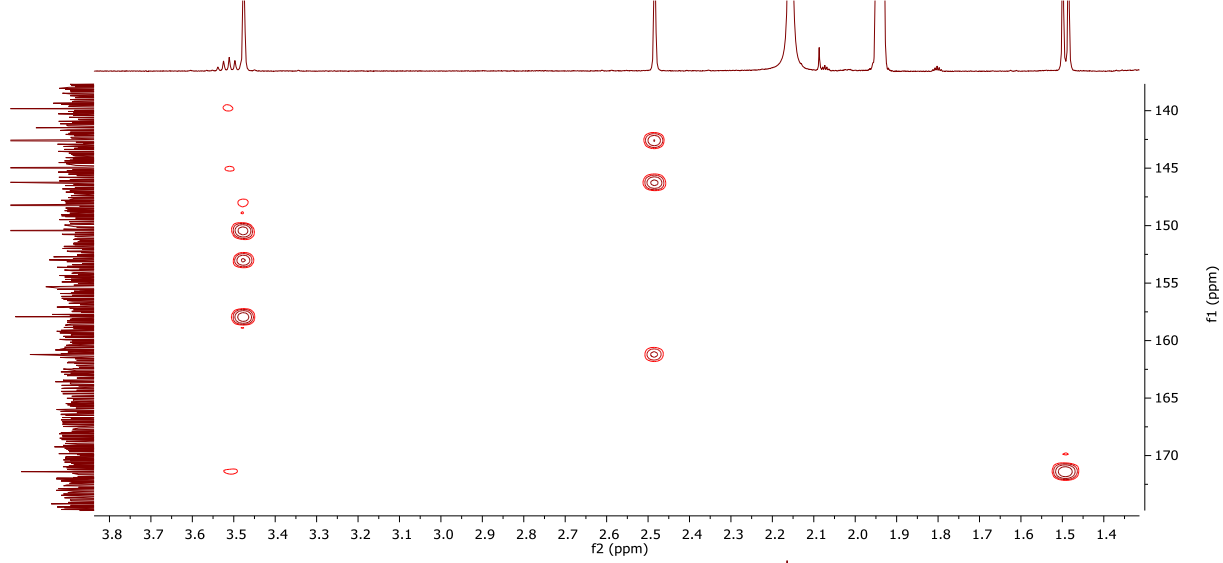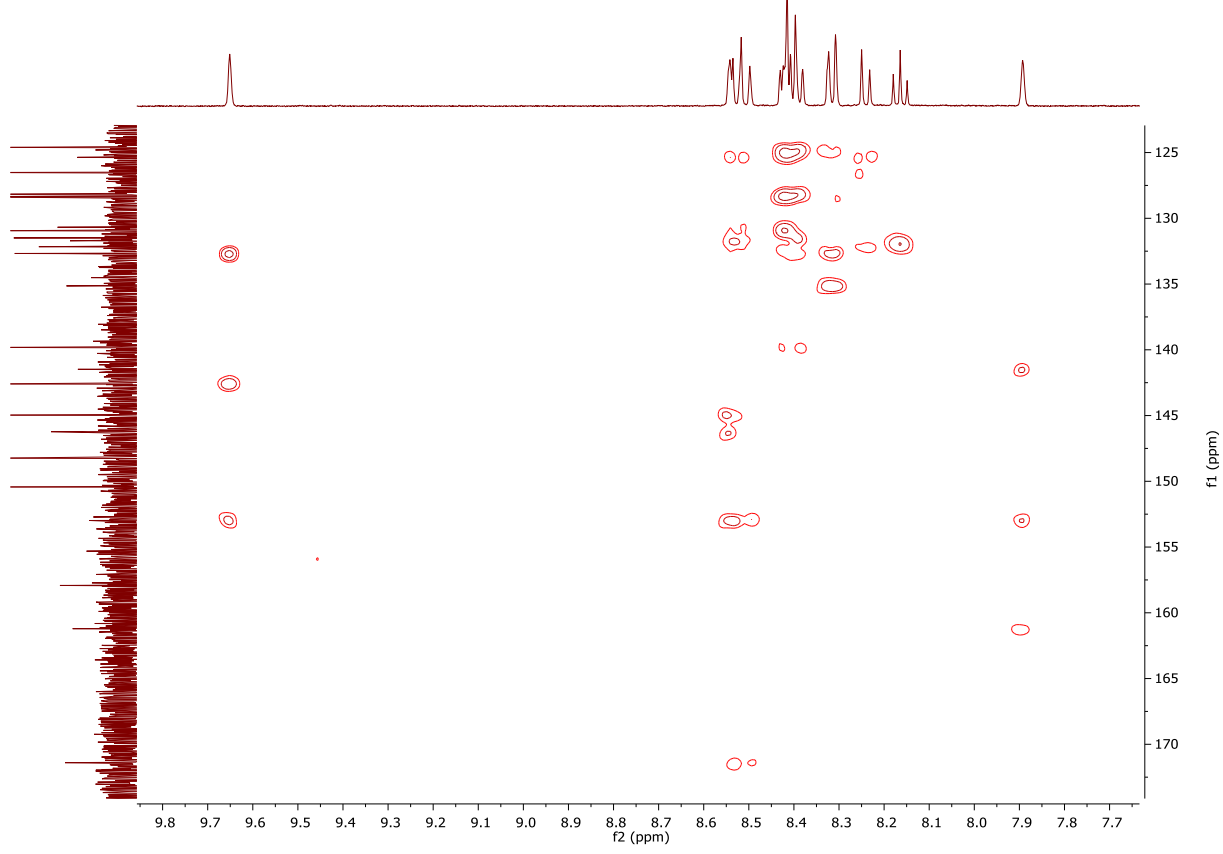

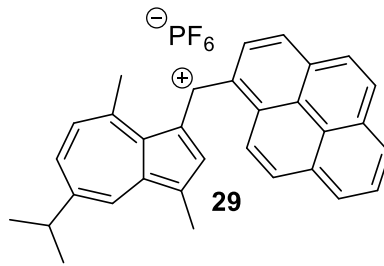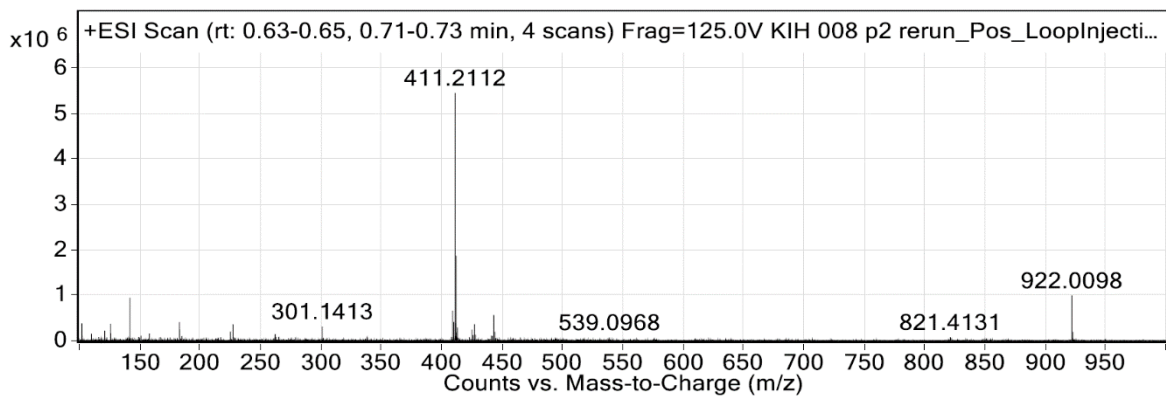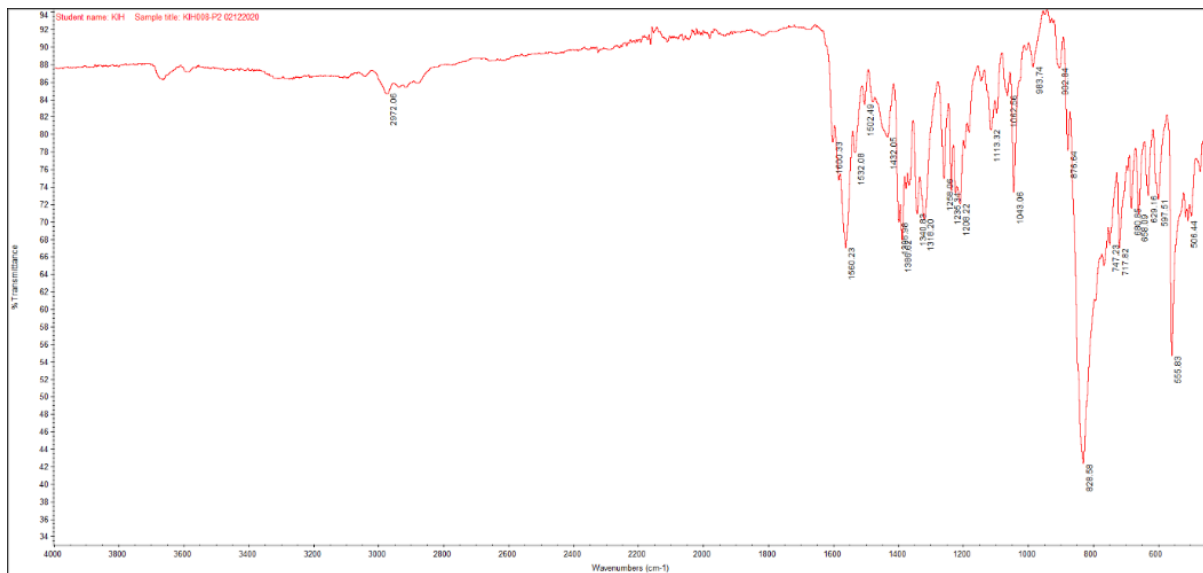

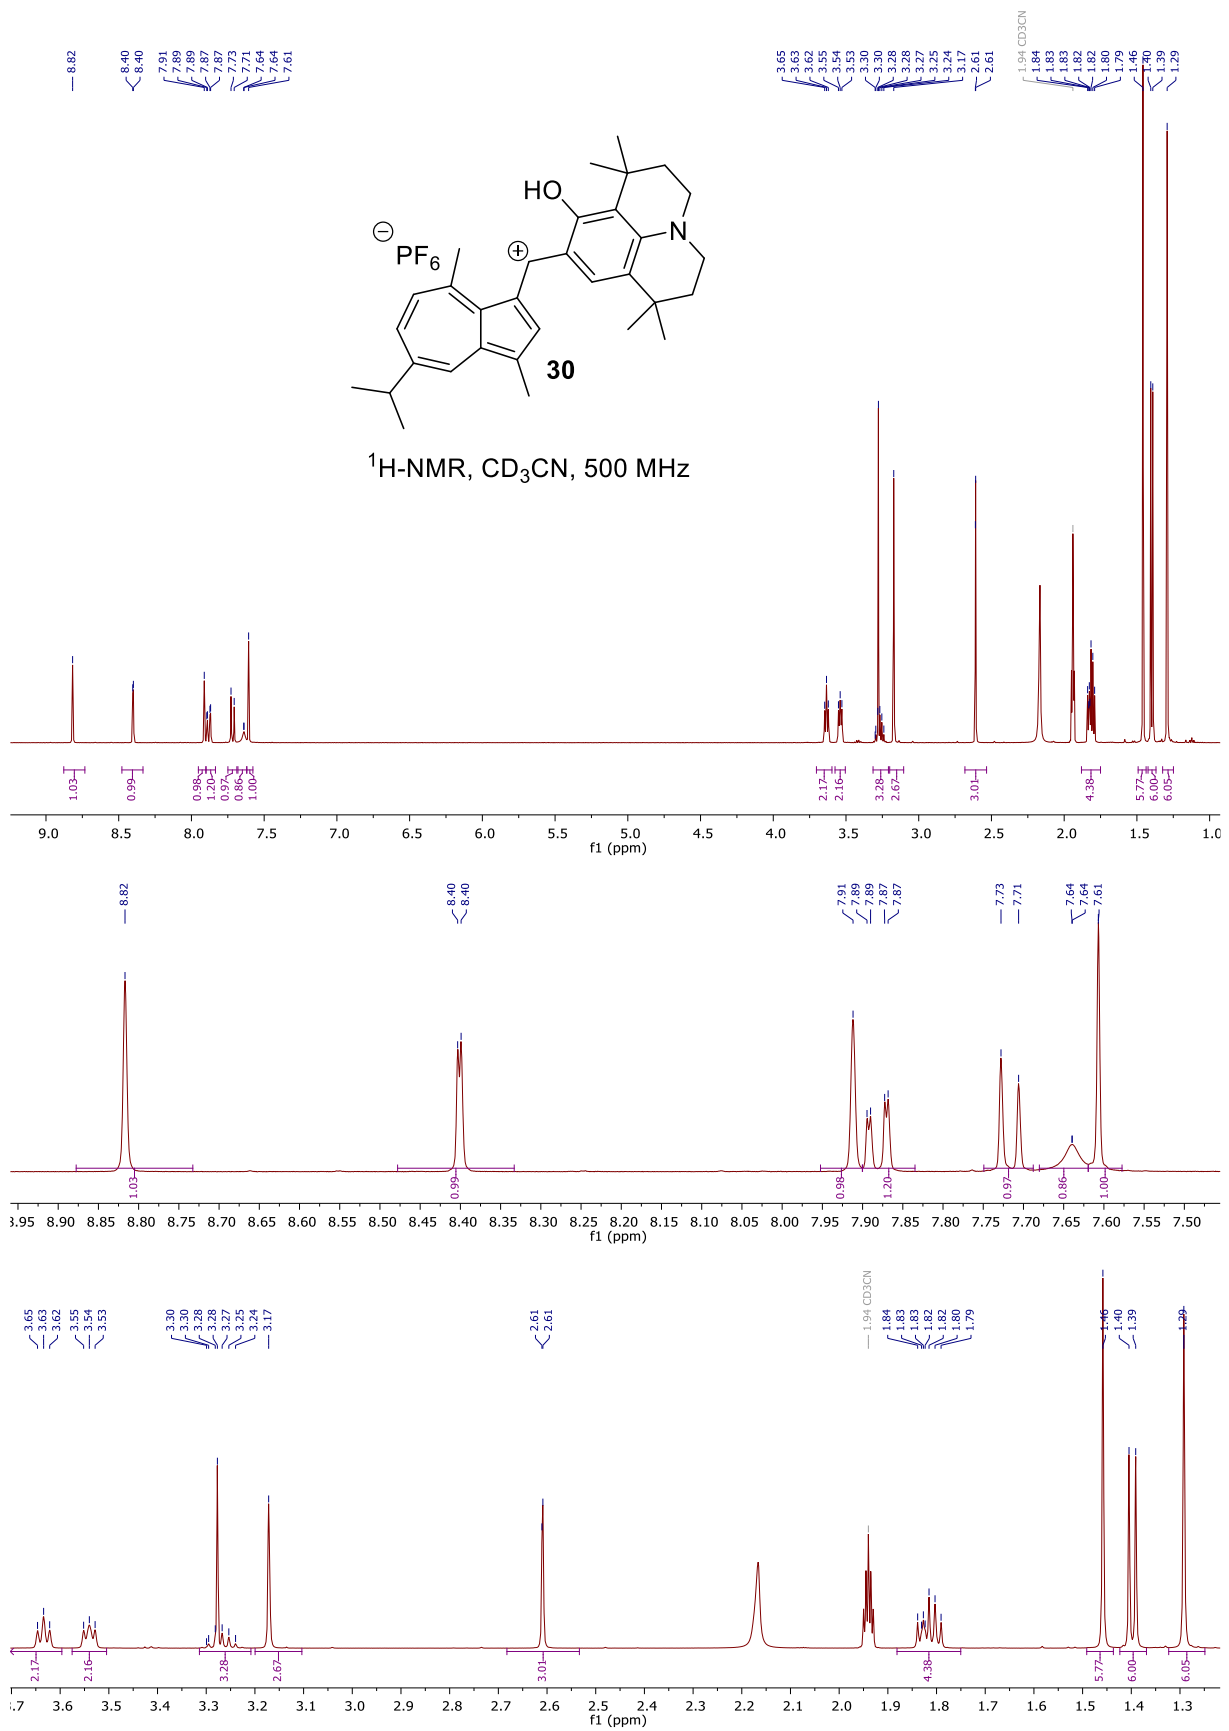

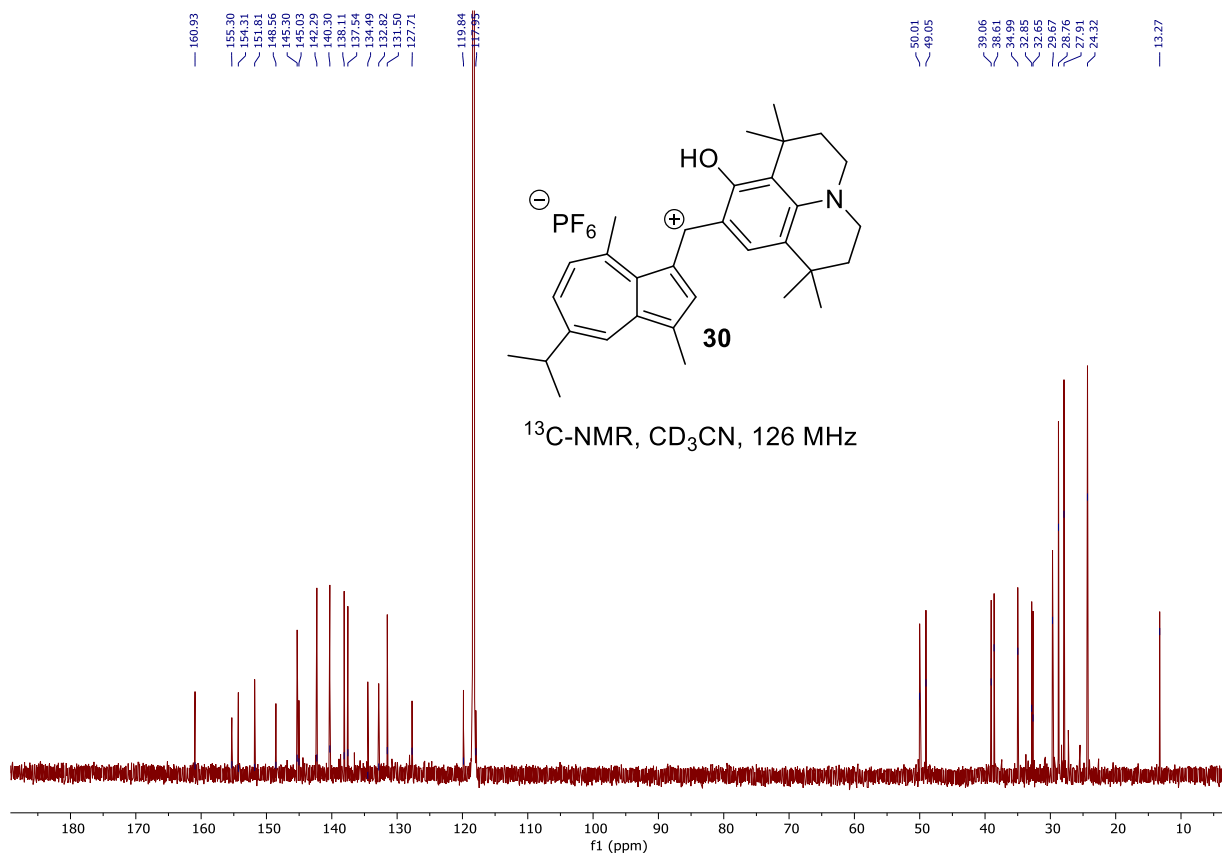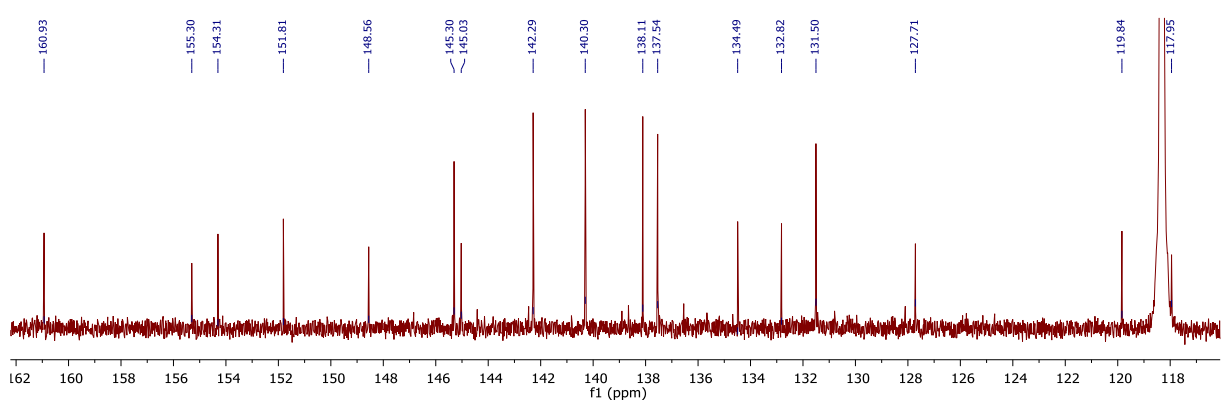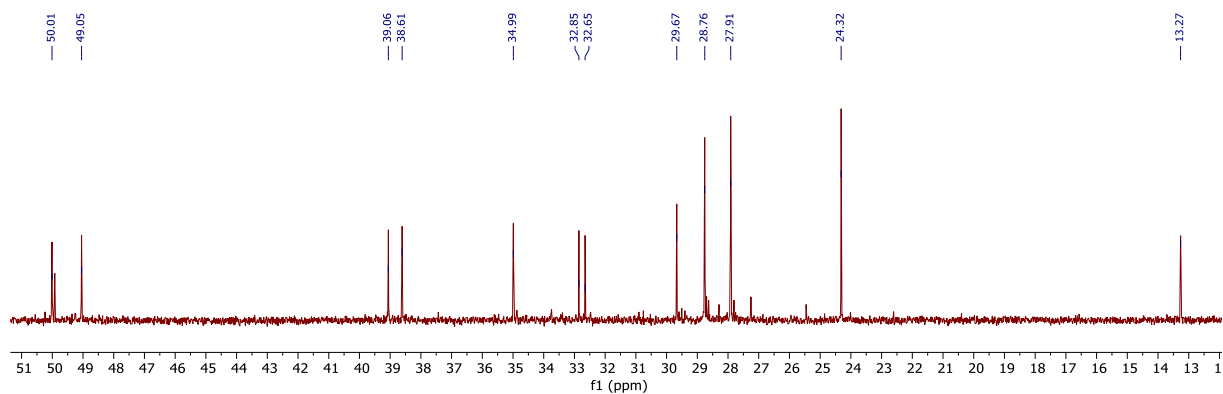

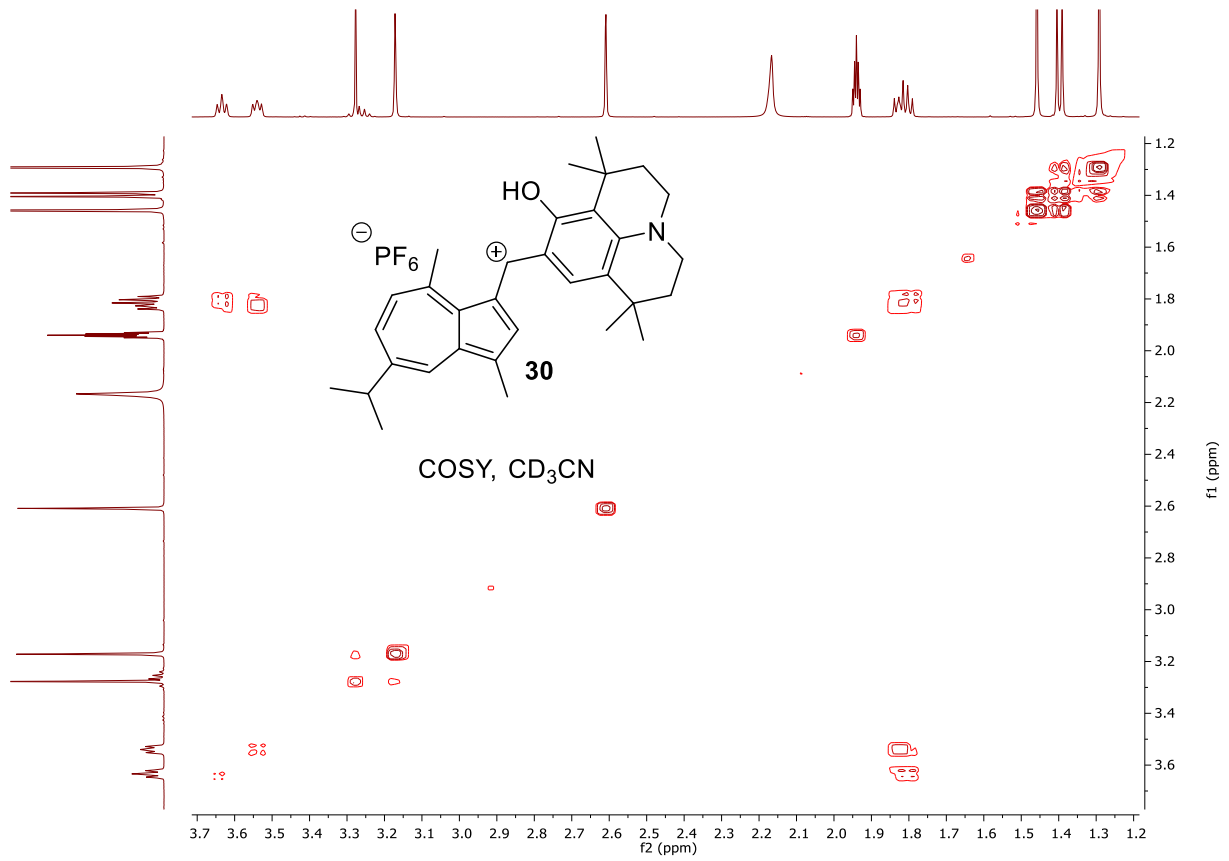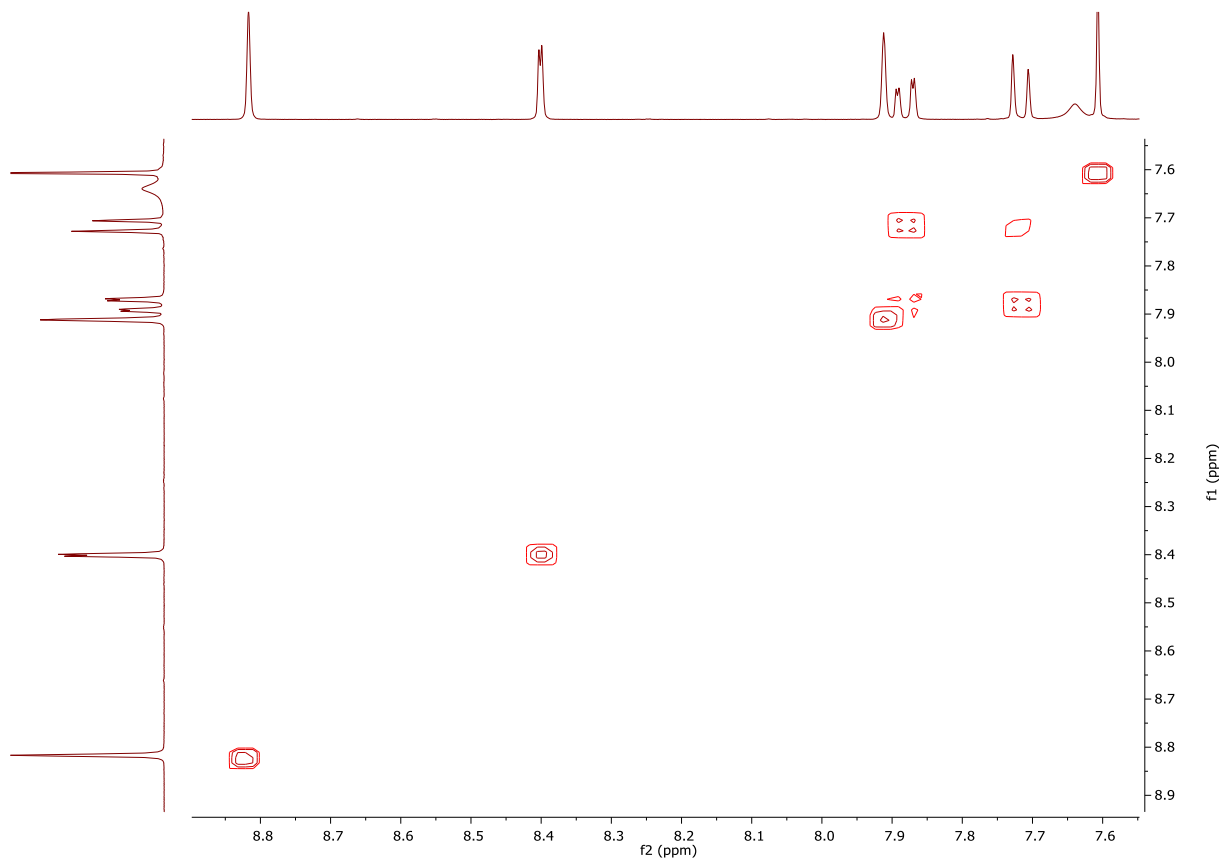

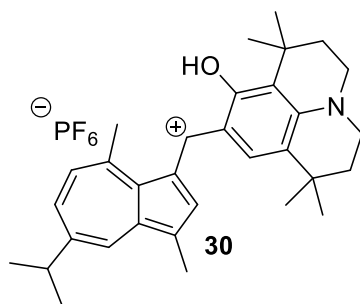

NOESY,  $\text{CD}_3\text{CN}$

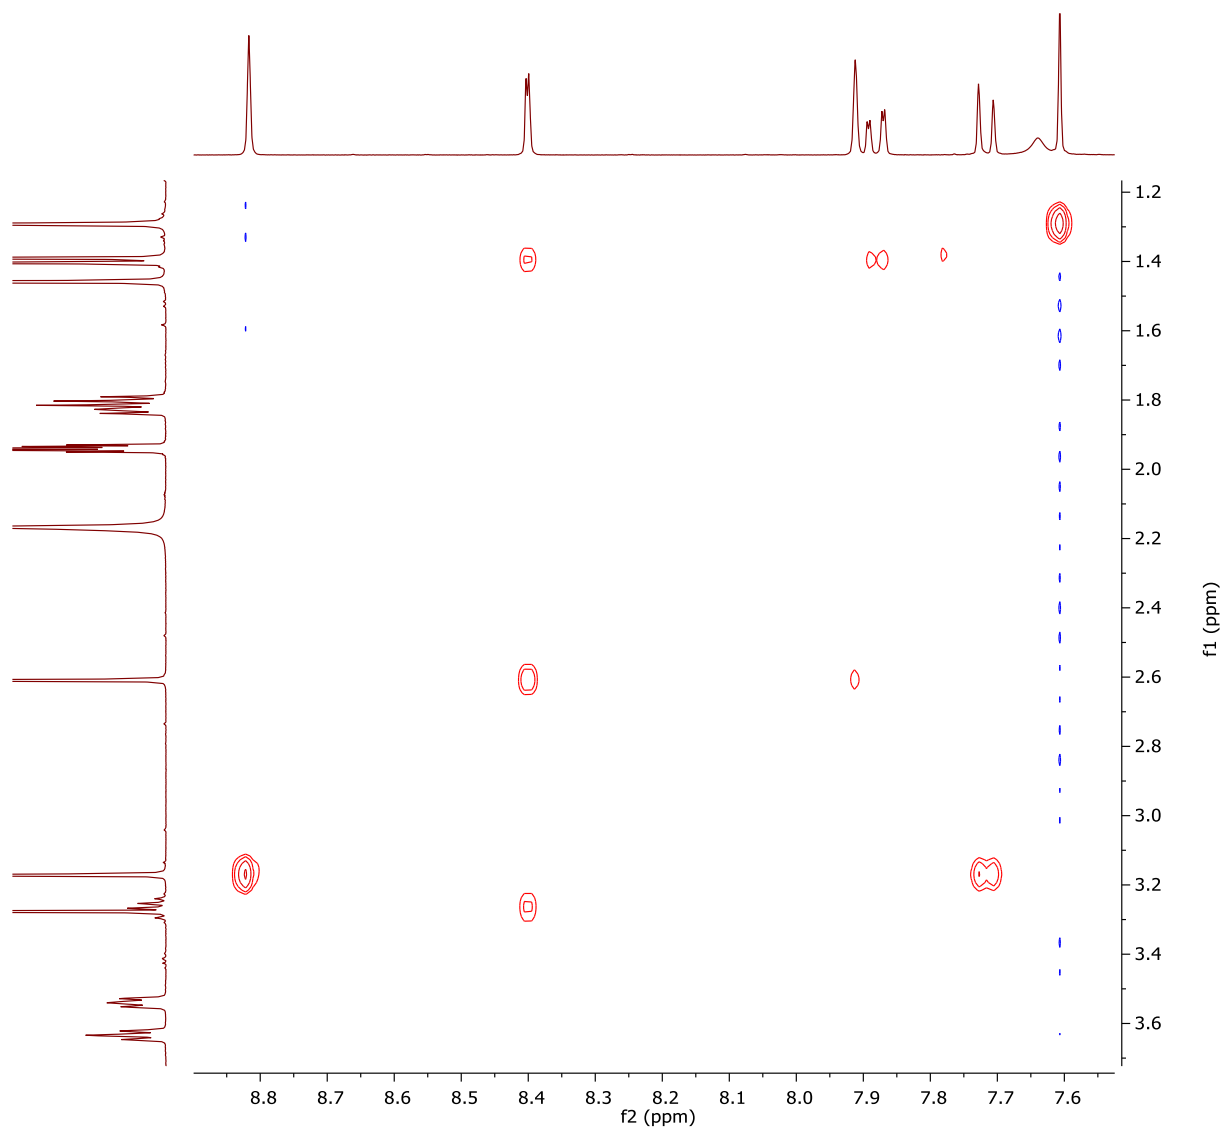

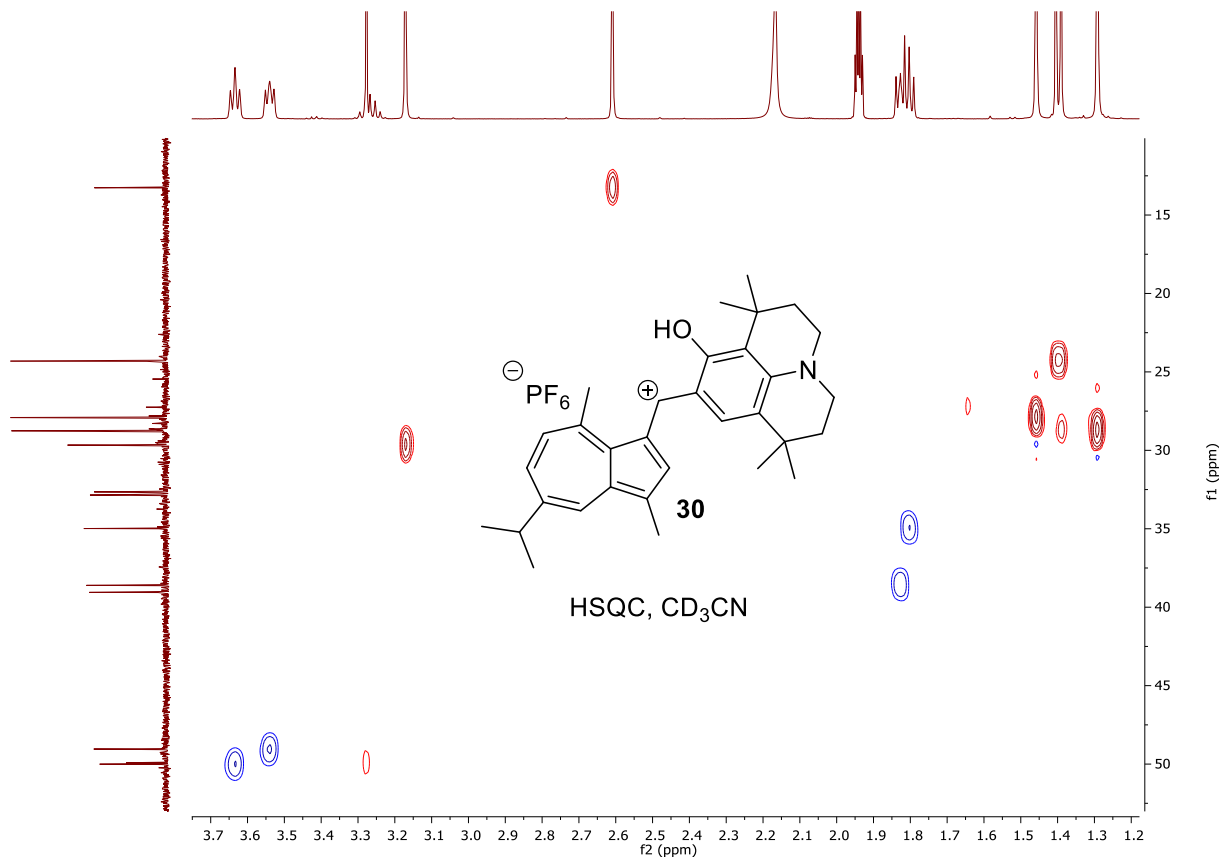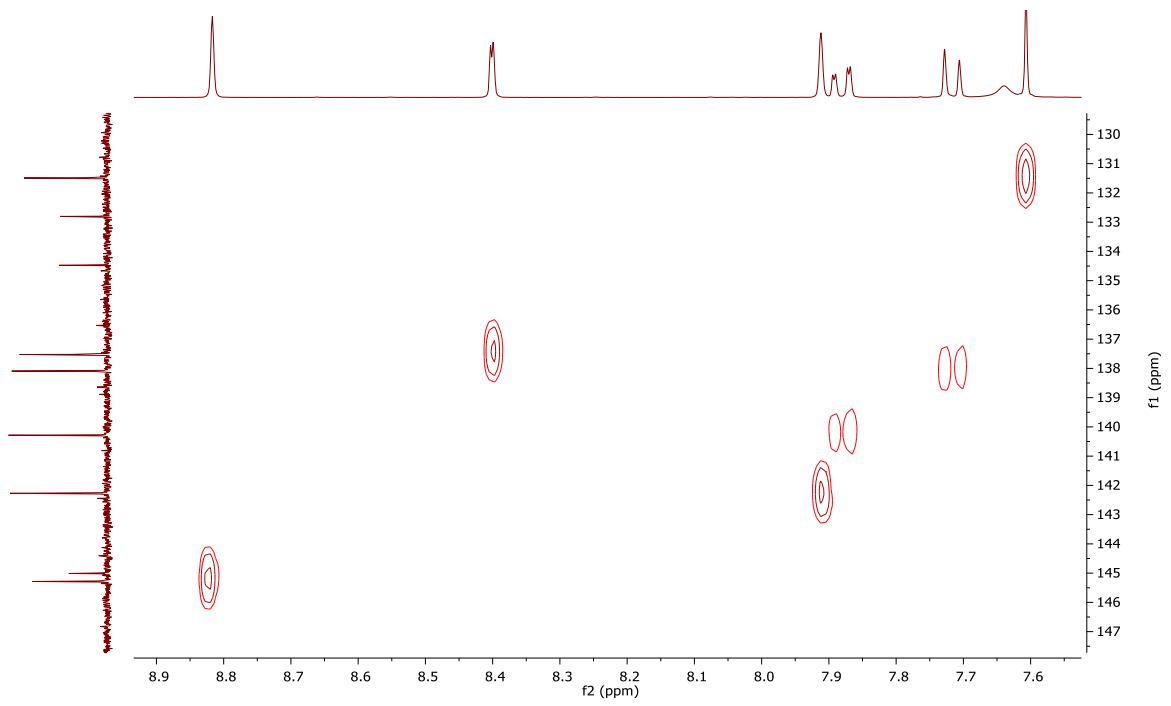

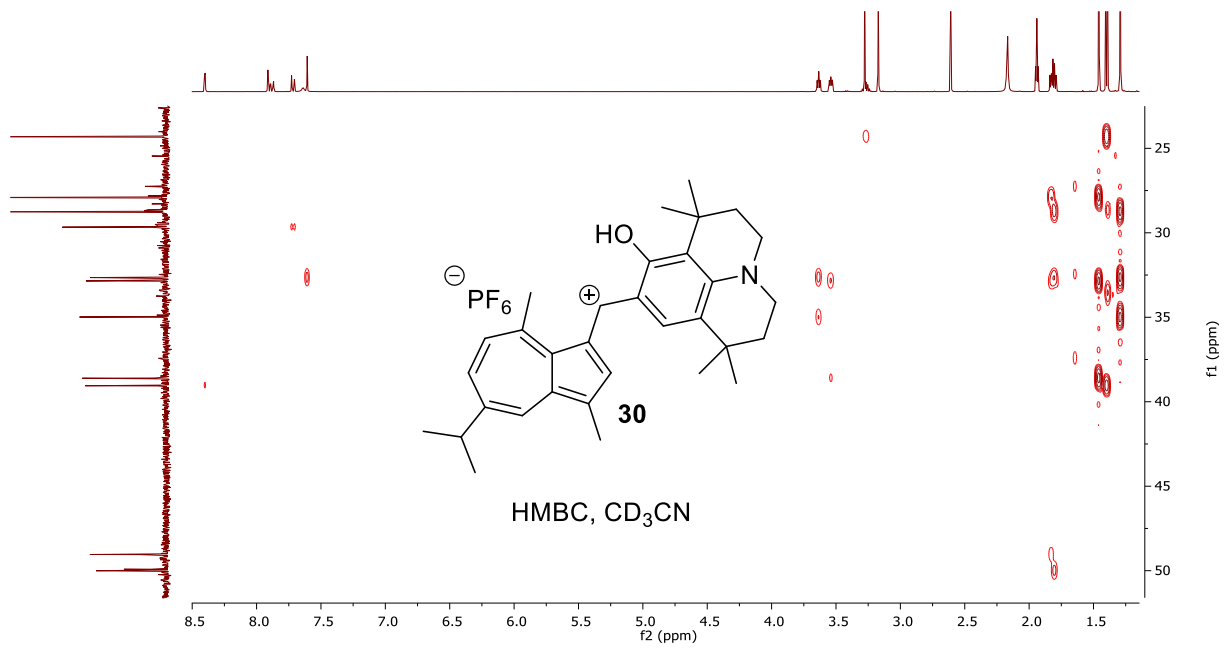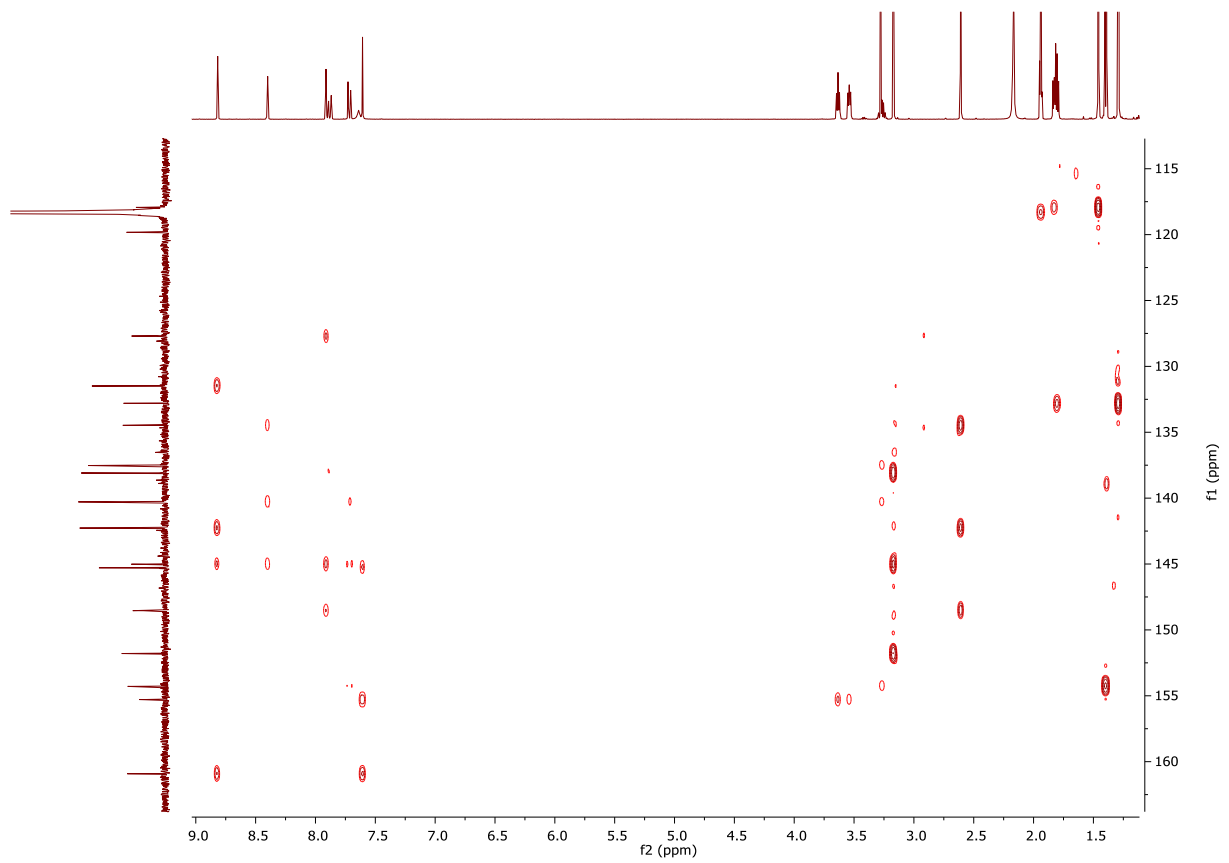



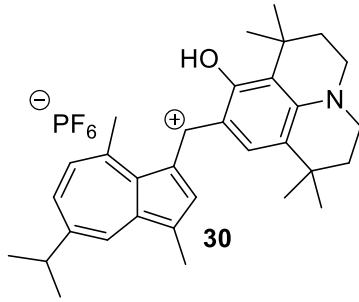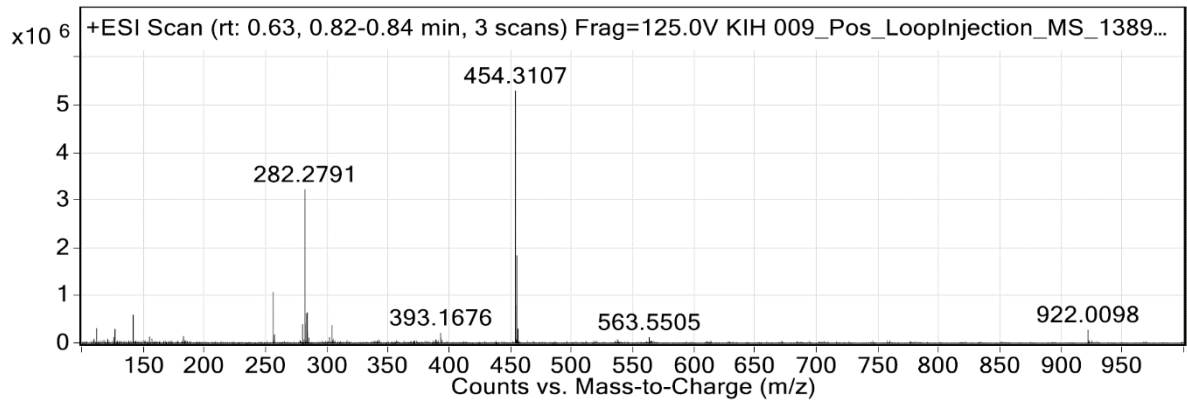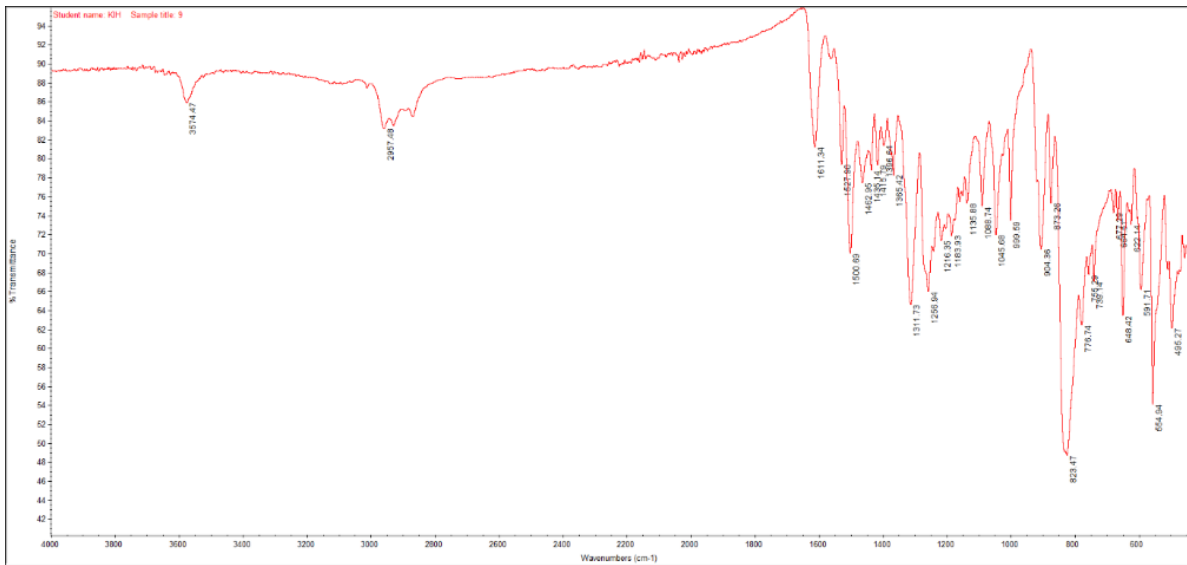

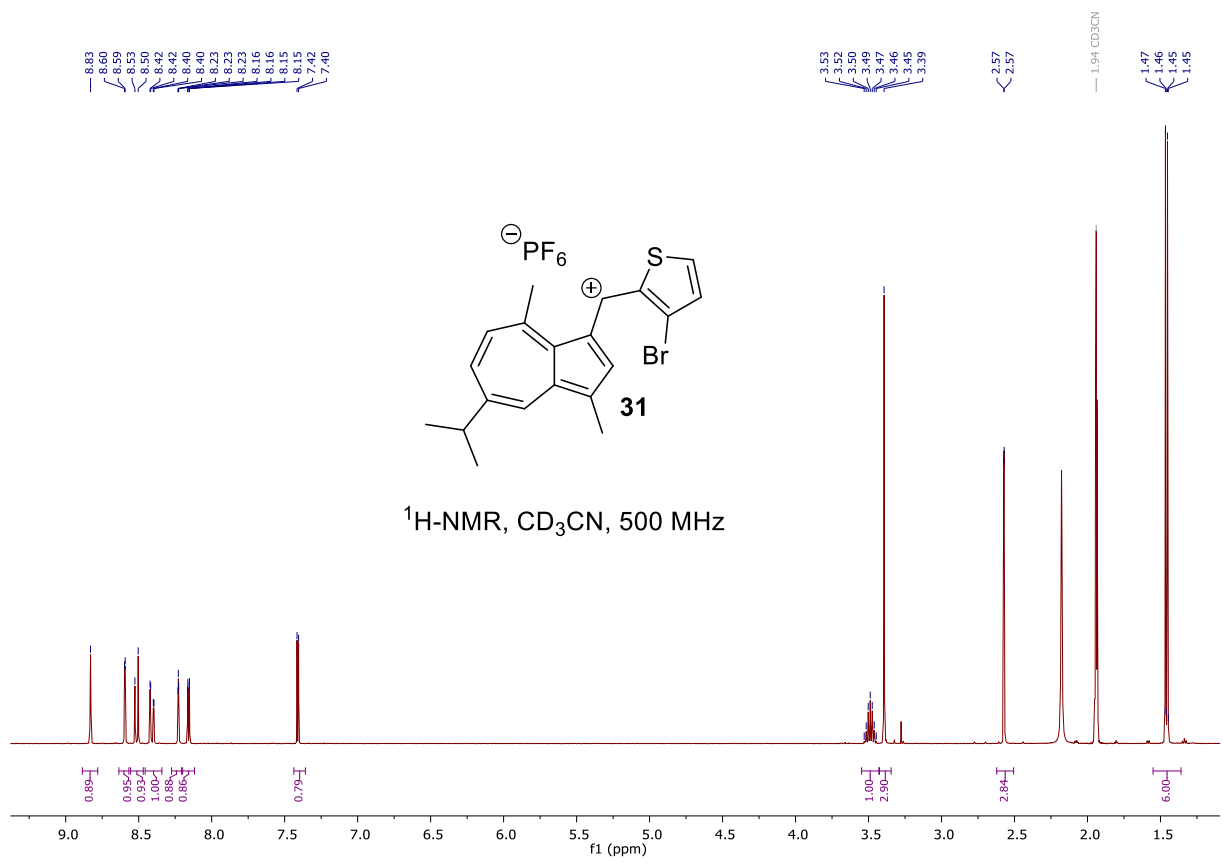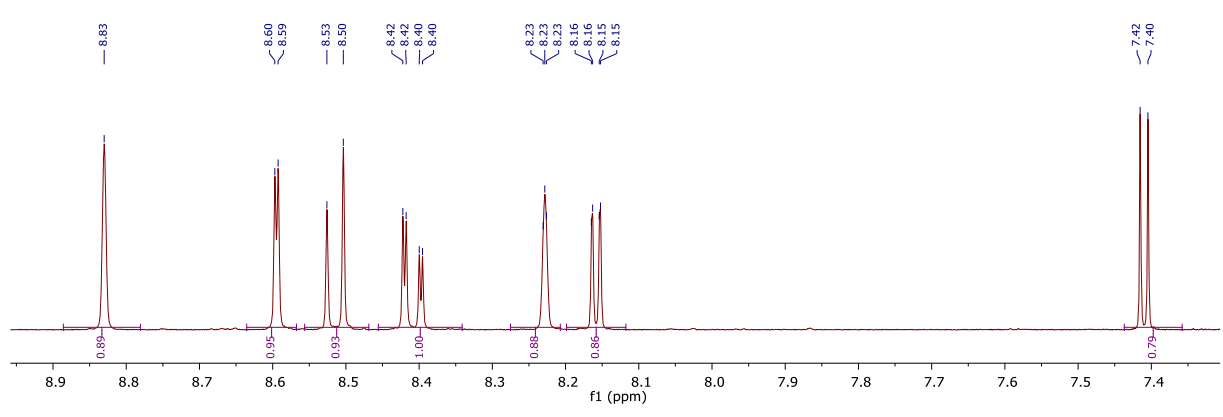

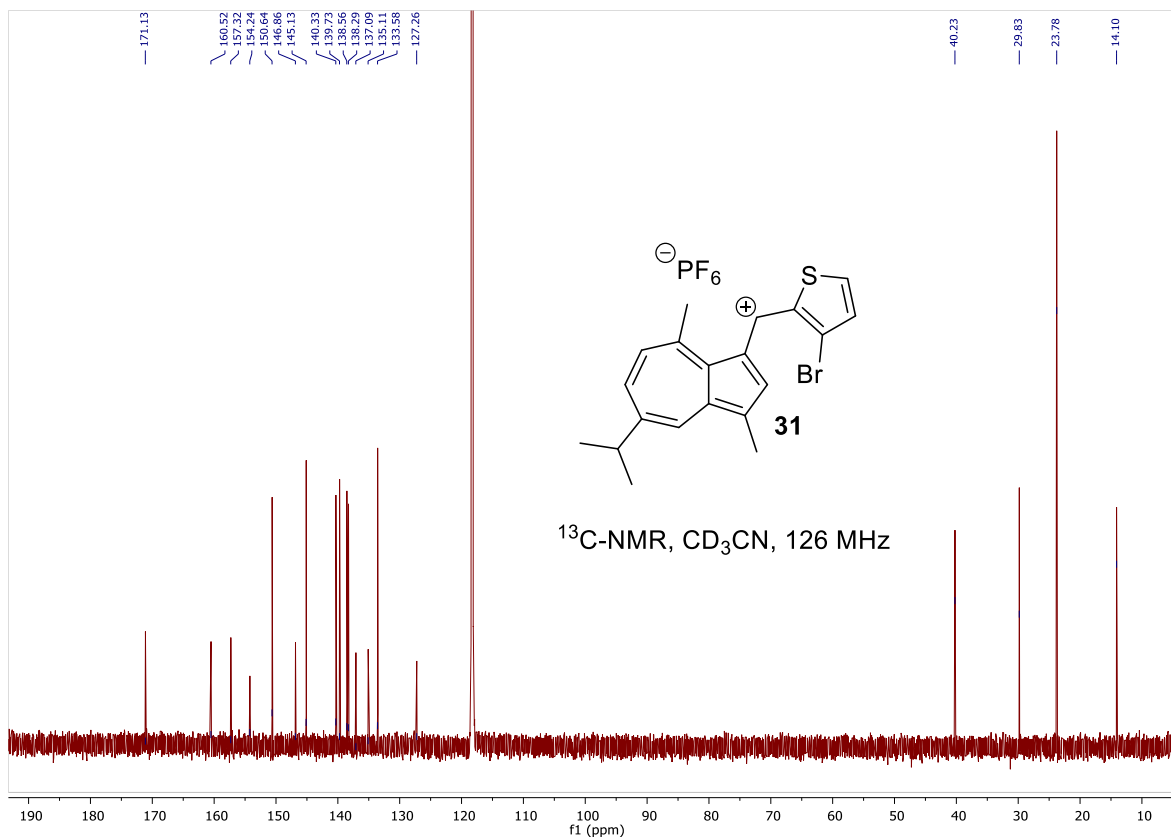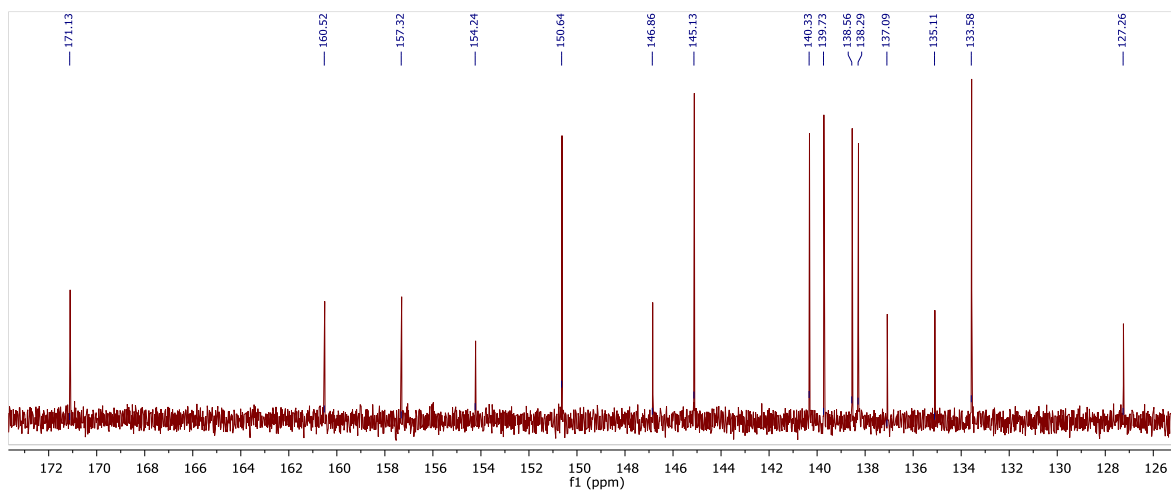

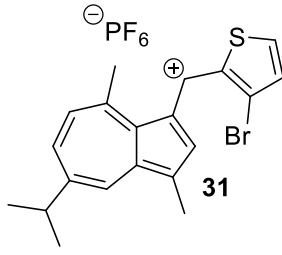

COSY, CD<sub>3</sub>CN

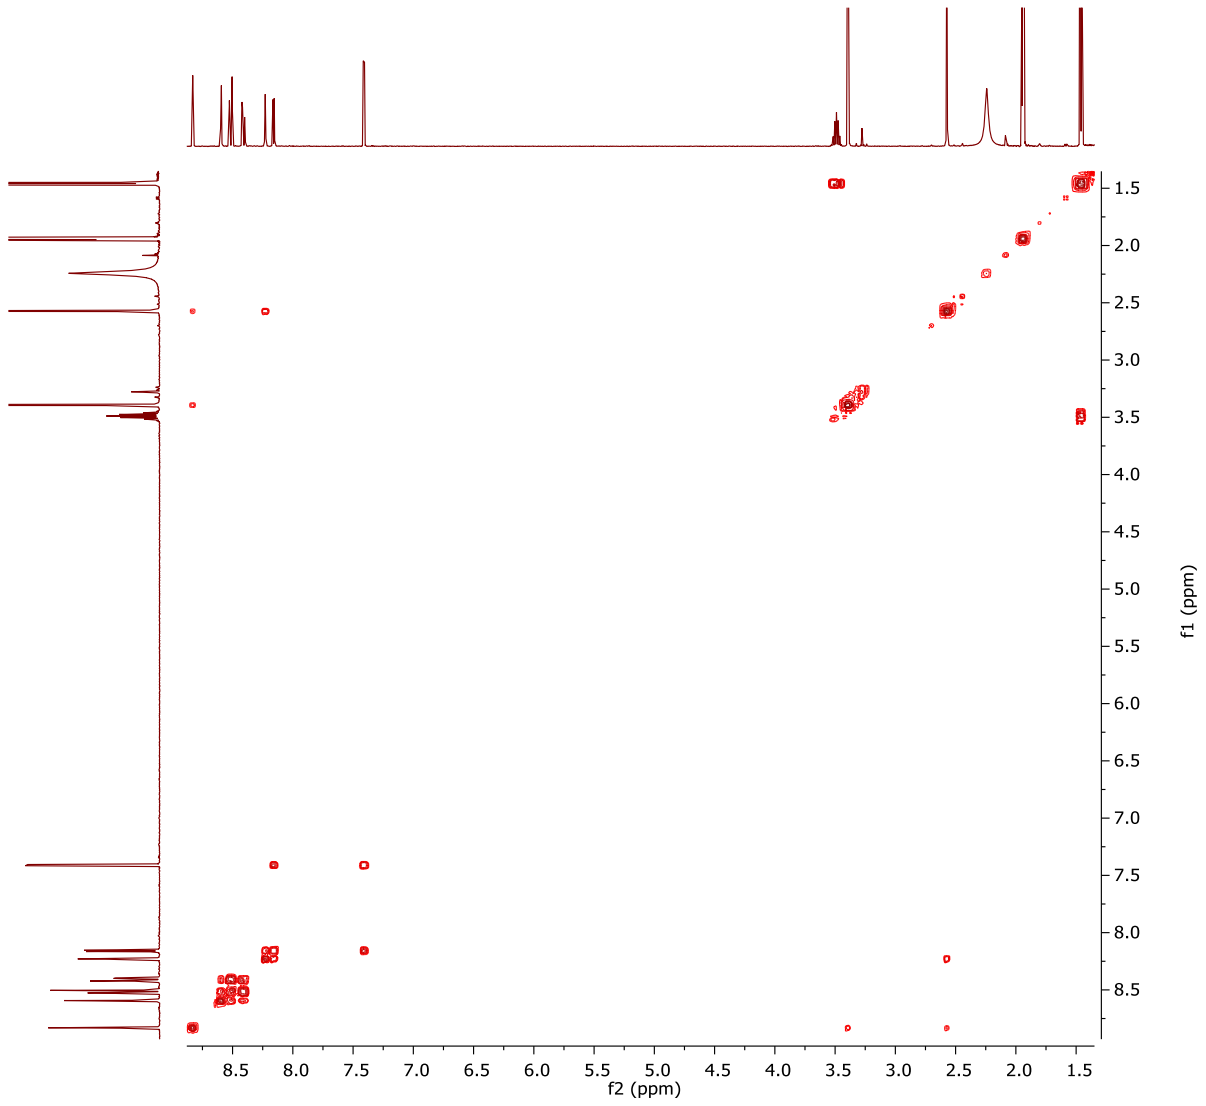

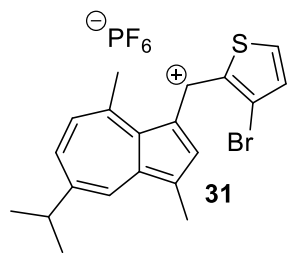

NOESY, CD<sub>3</sub>CN

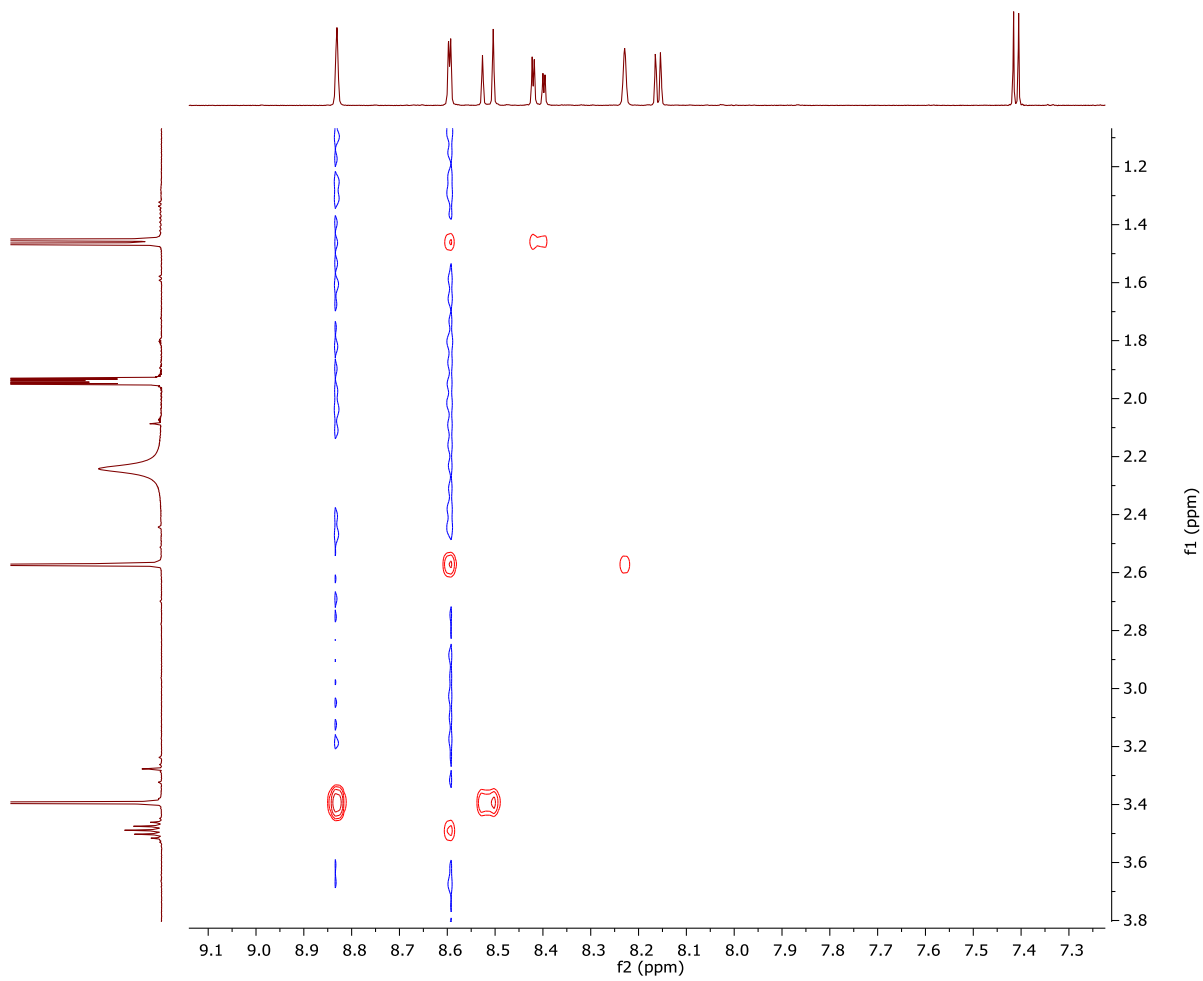

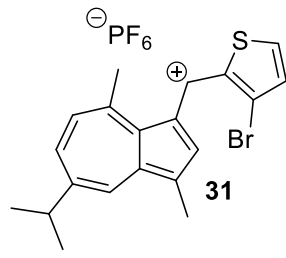

HSQC, CD<sub>3</sub>CN

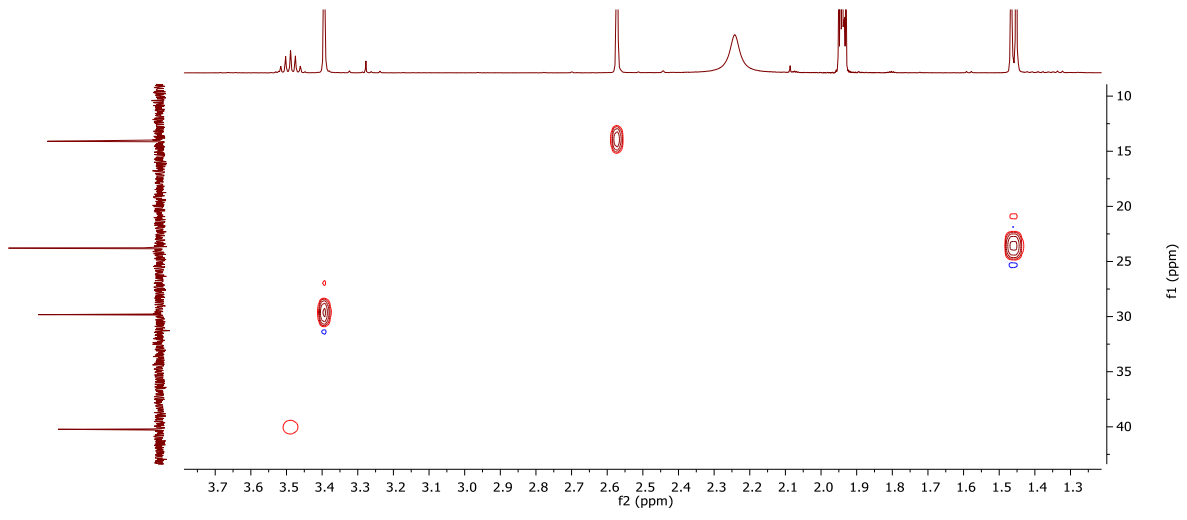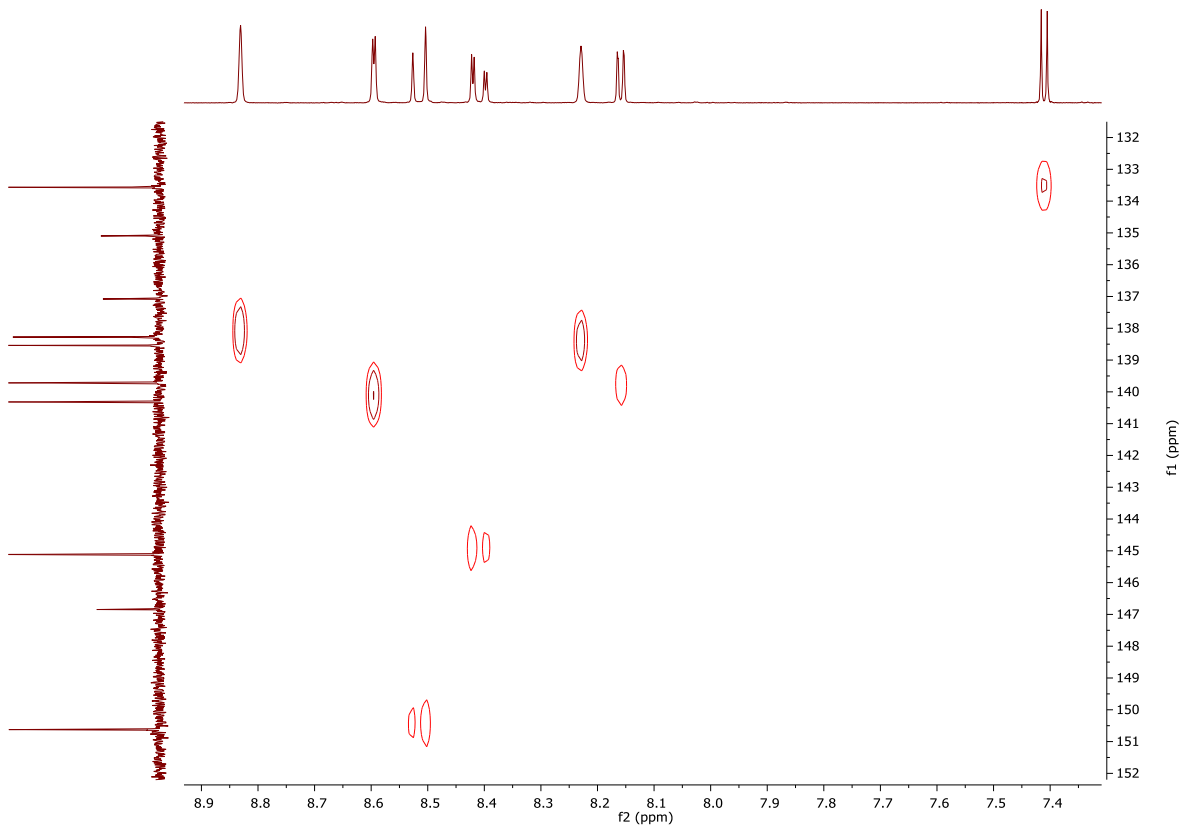

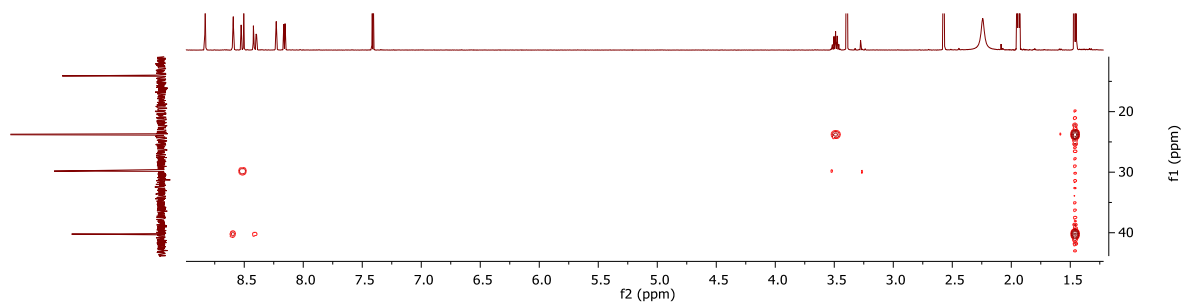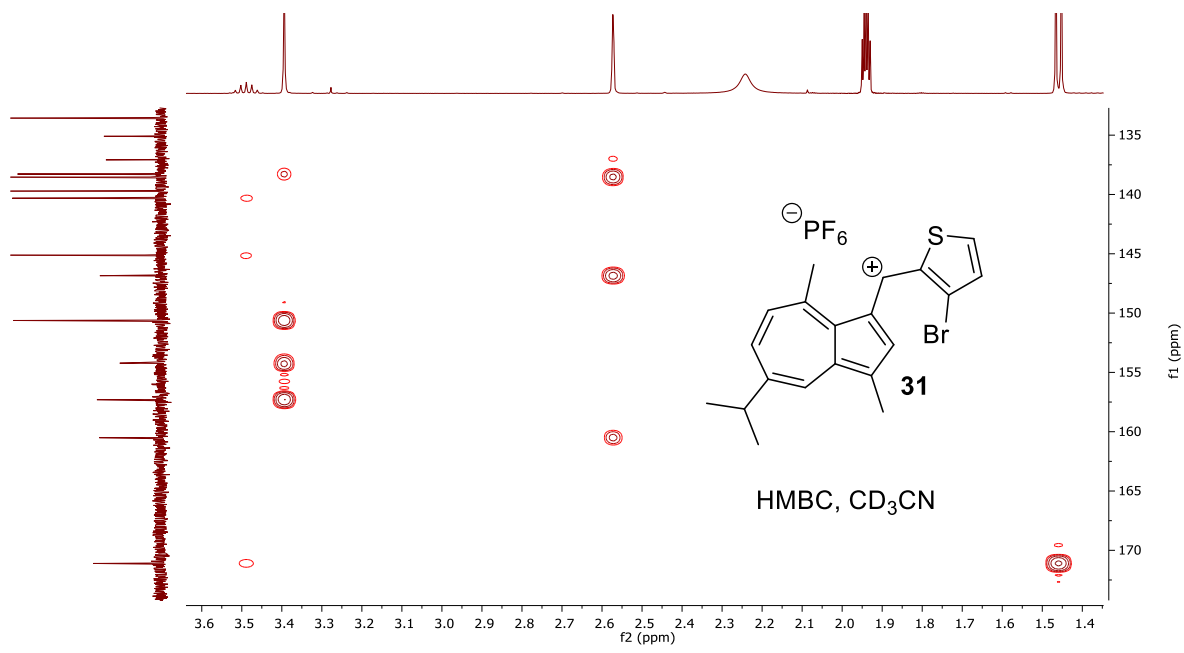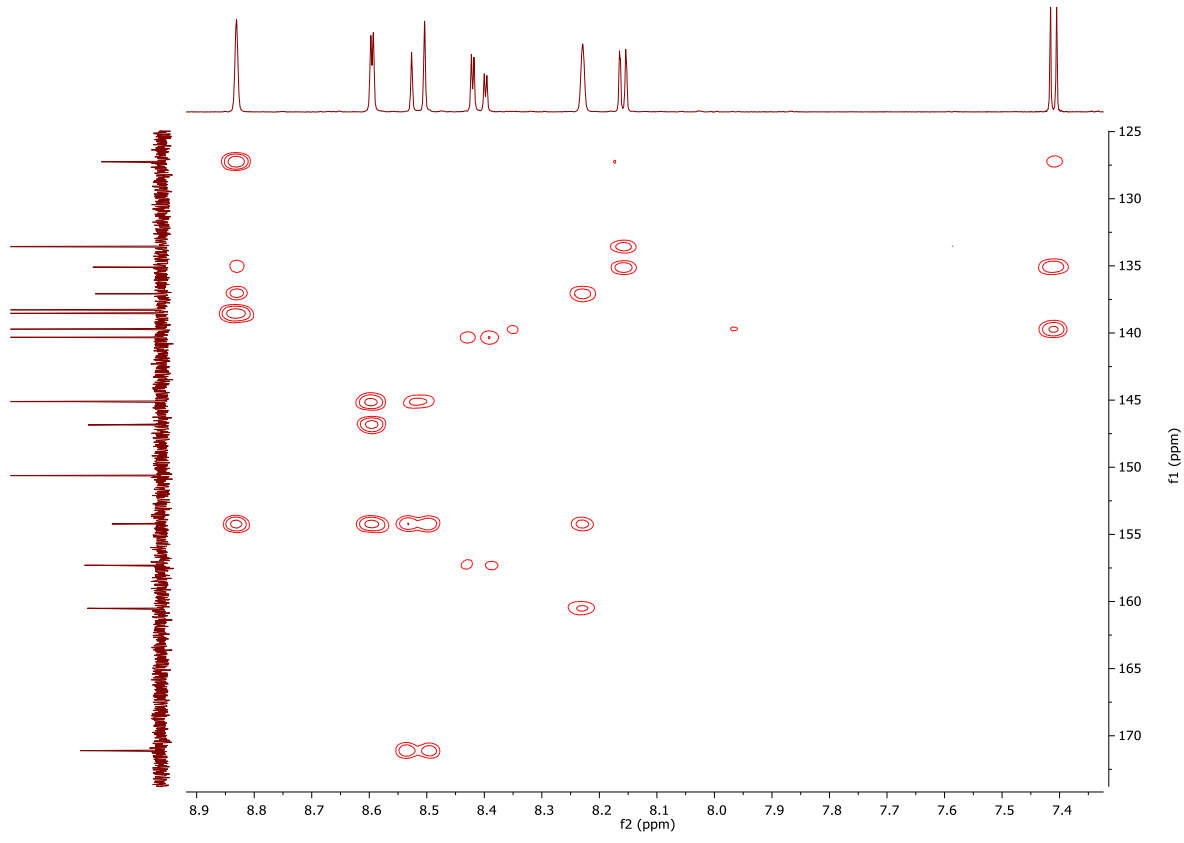

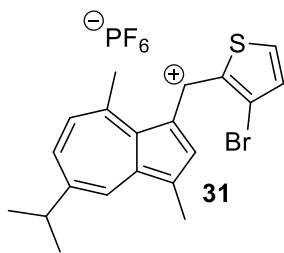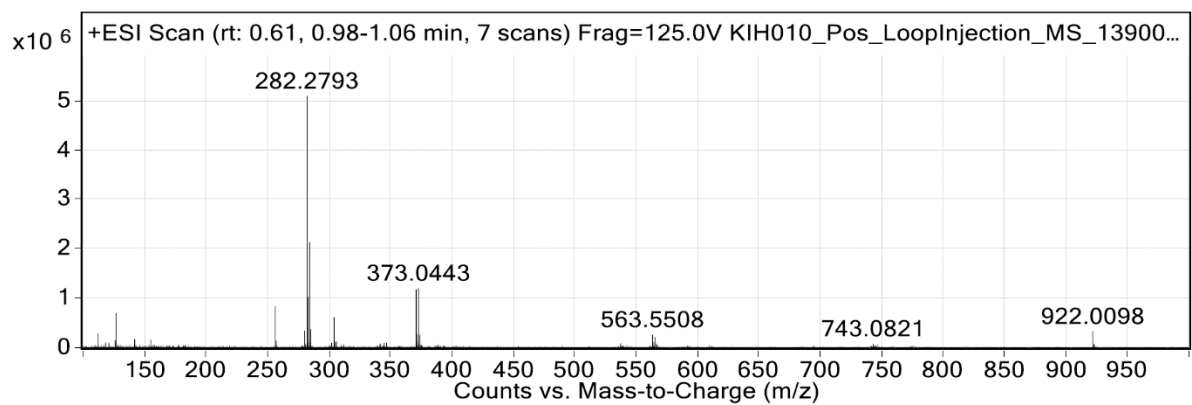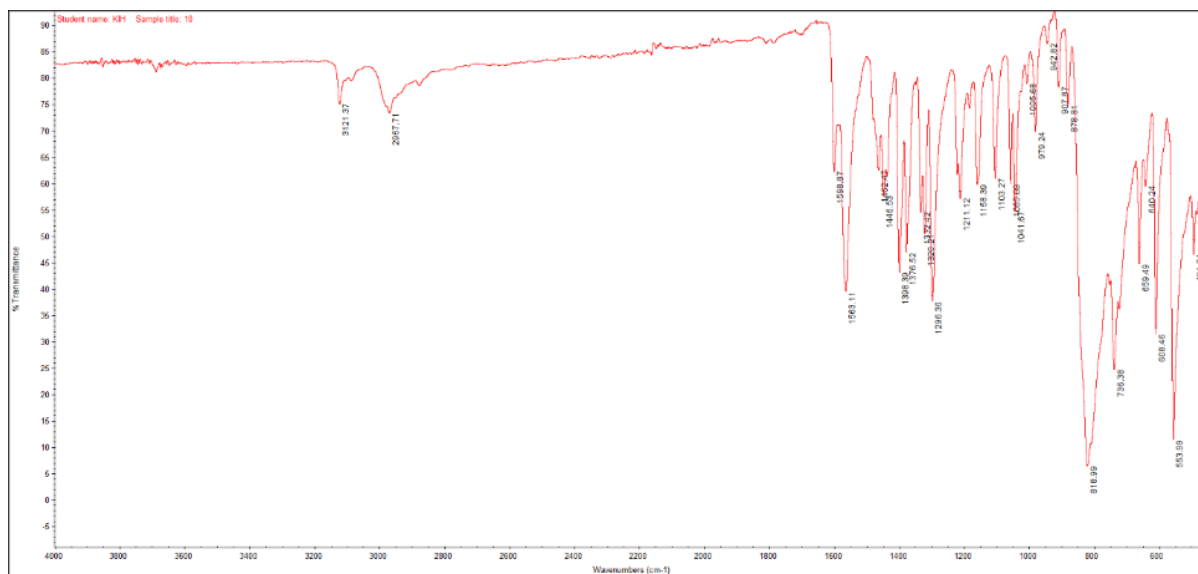



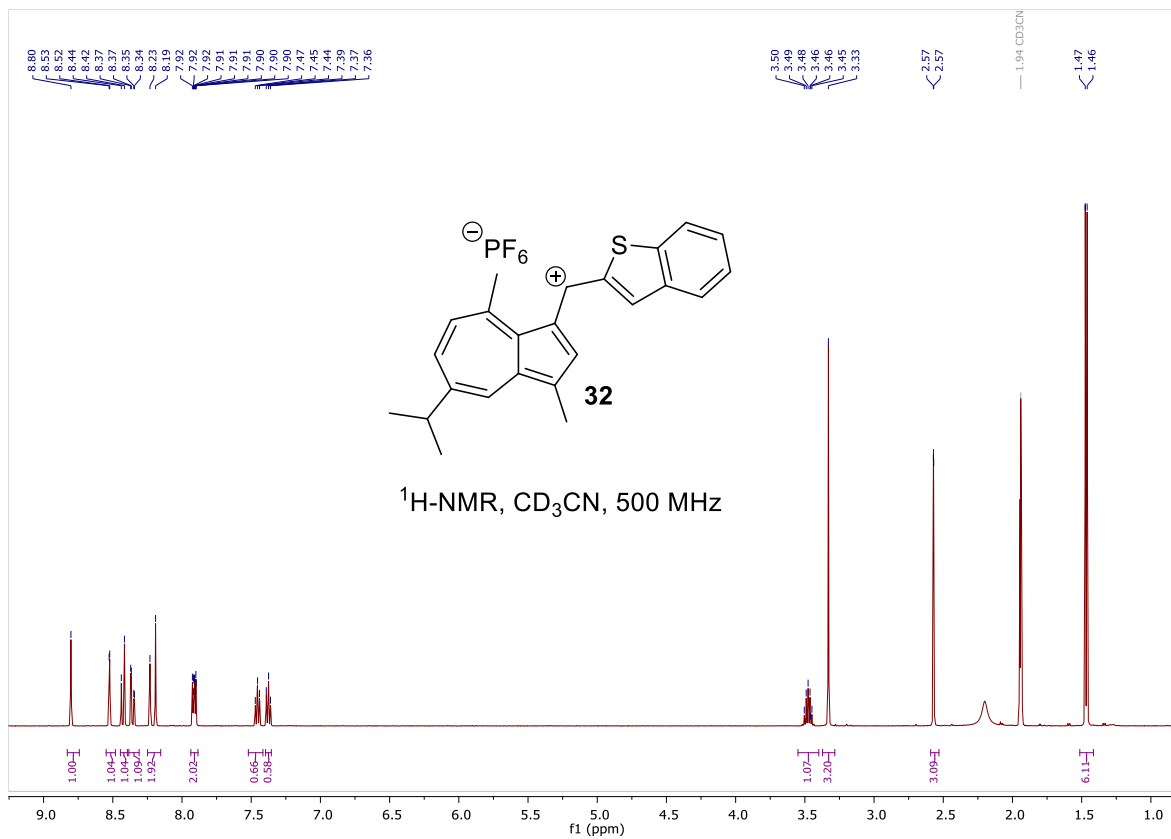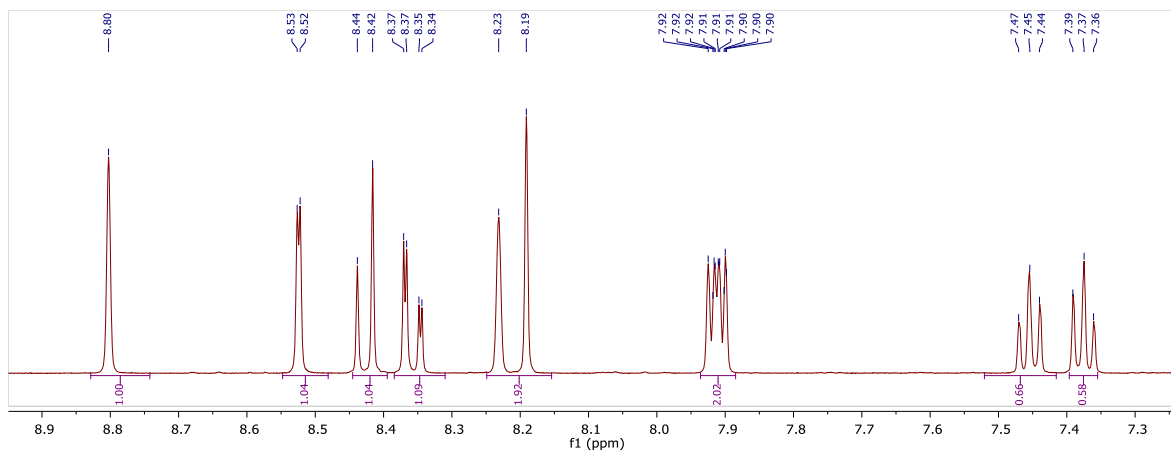

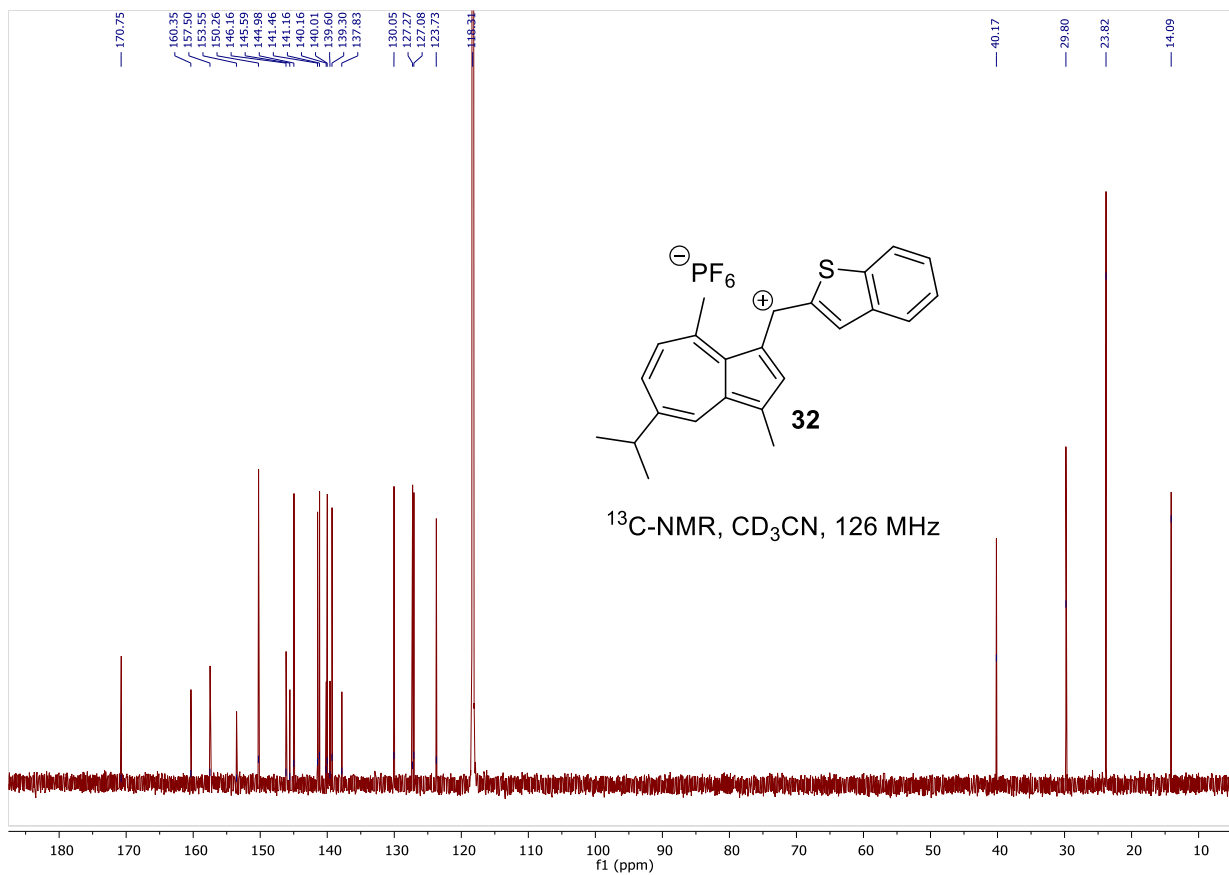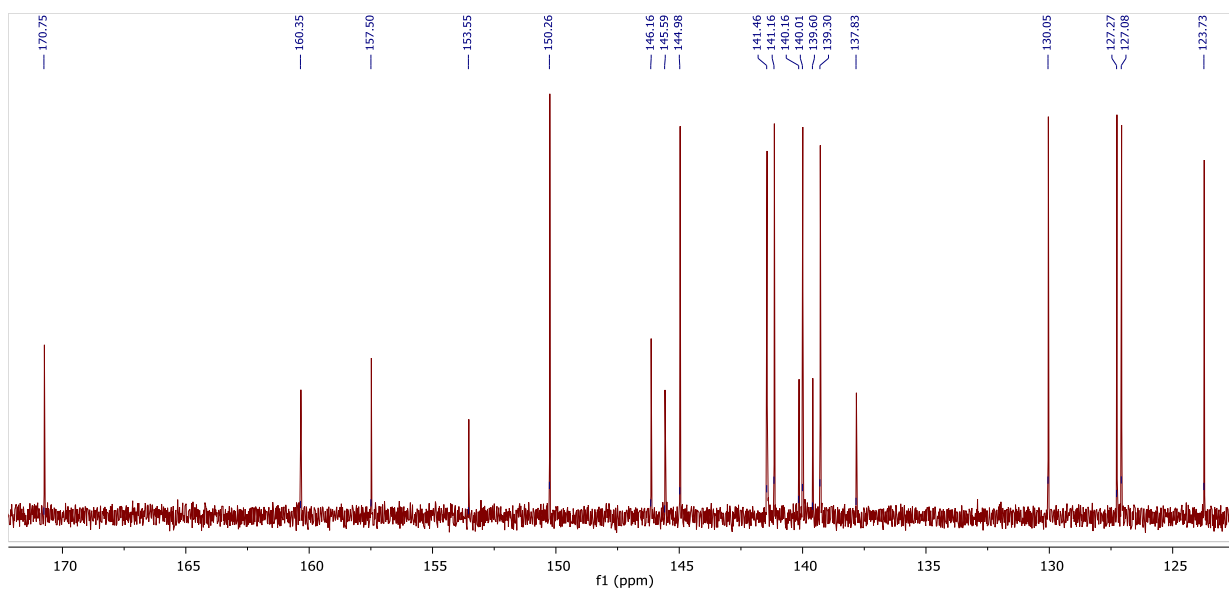

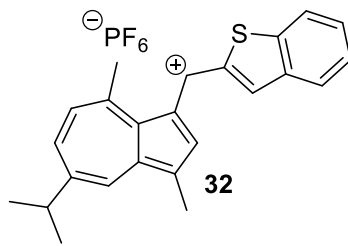

COSY, CD<sub>3</sub>CN,

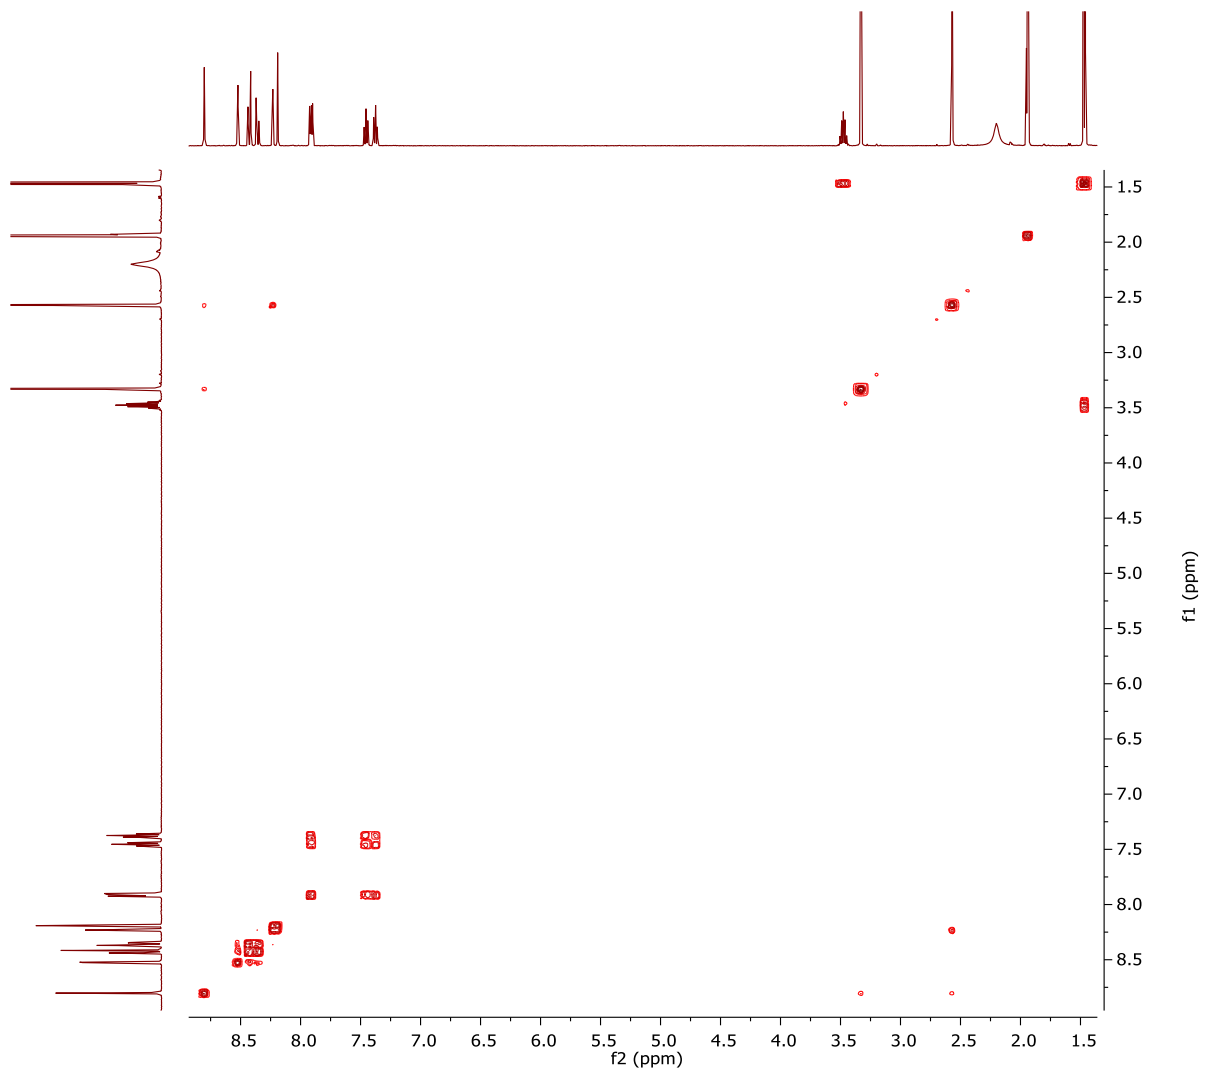

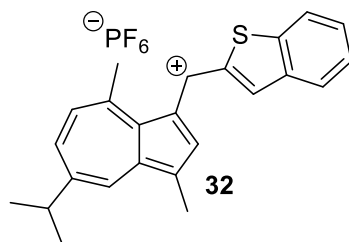

NOESY, CD<sub>3</sub>CN,

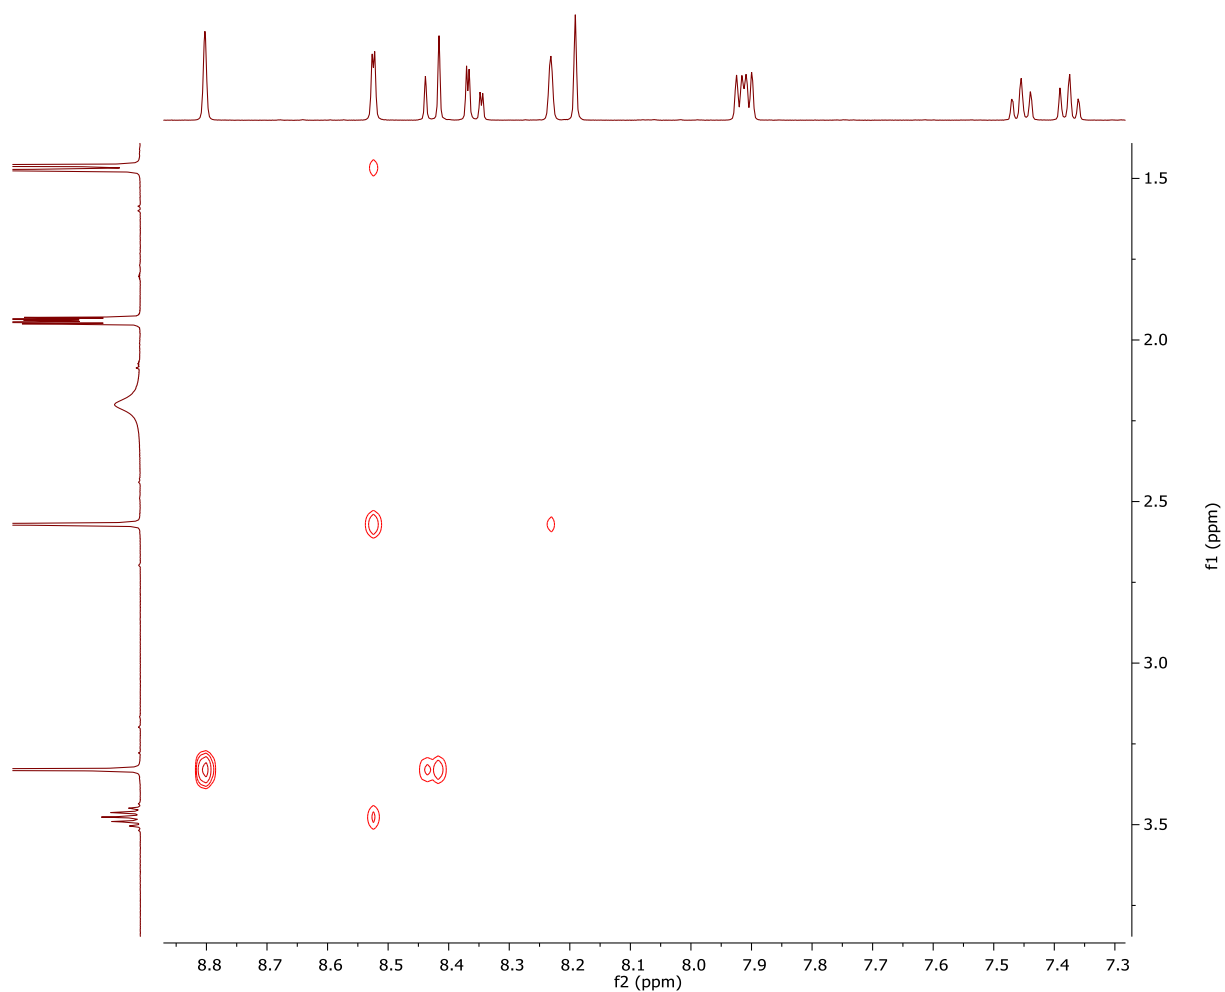

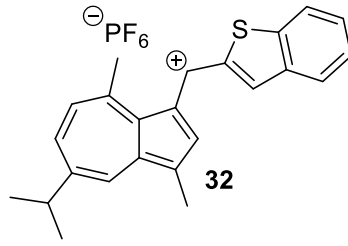

HSQC,  $\text{CD}_3\text{CN}$ ,

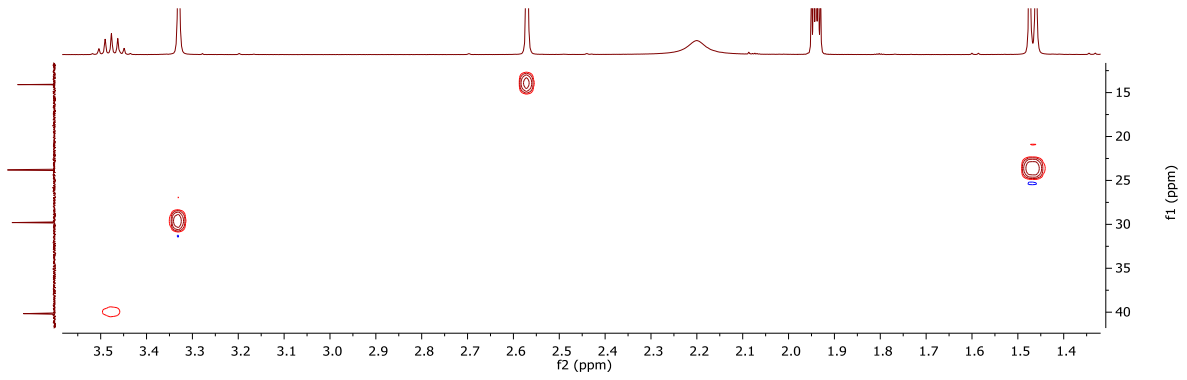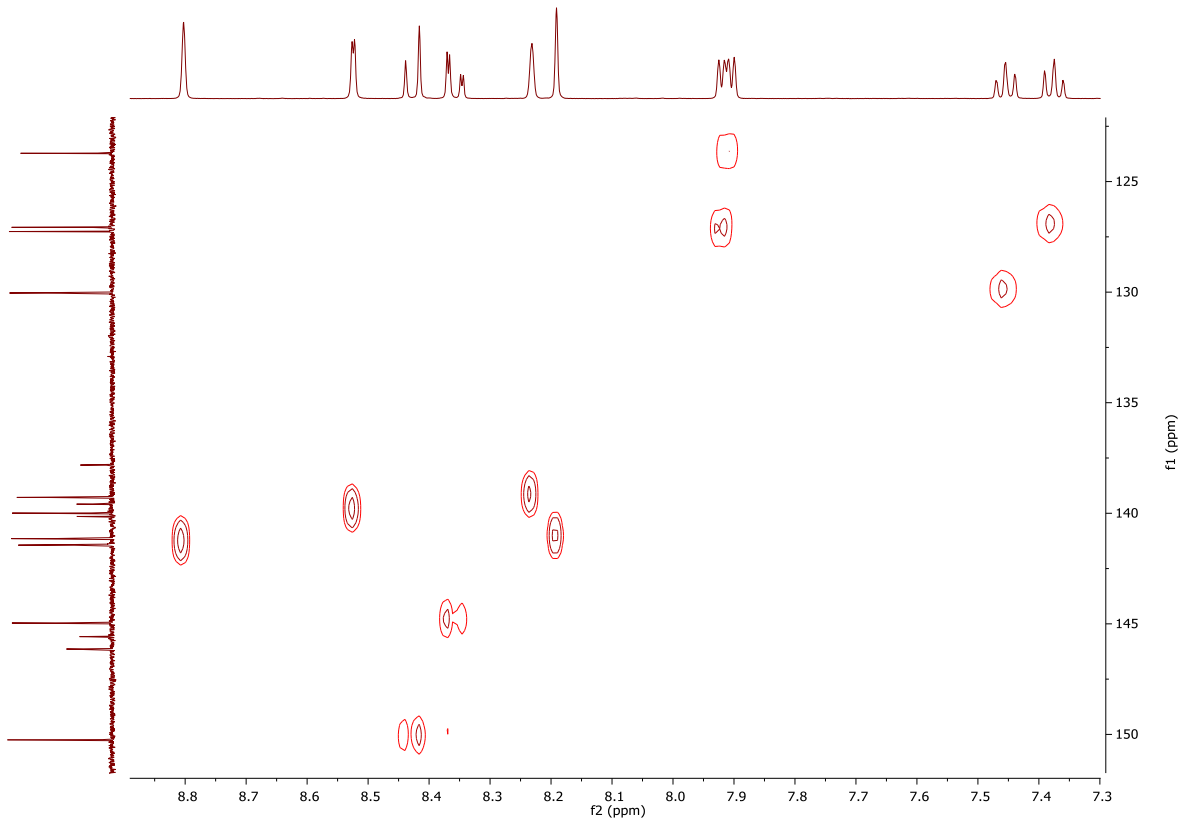

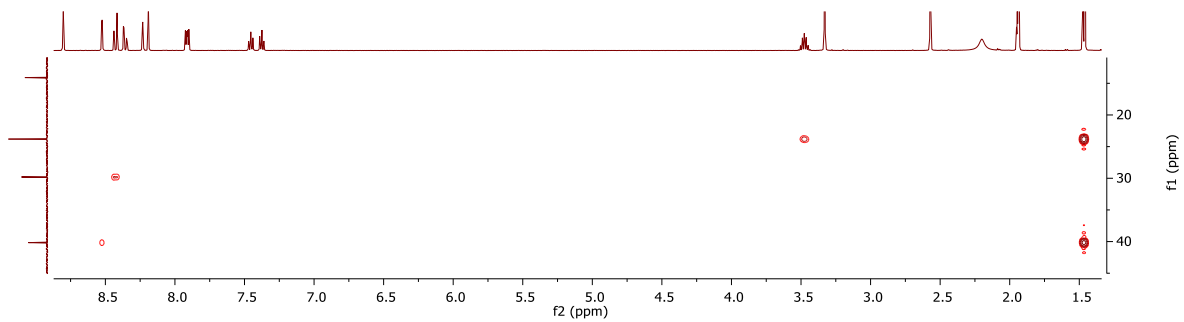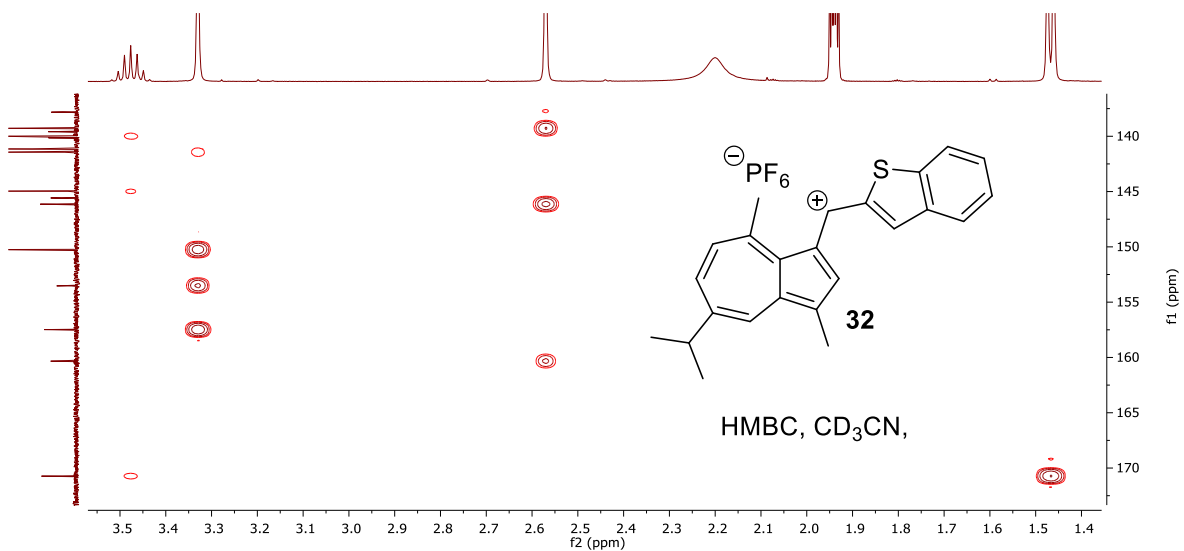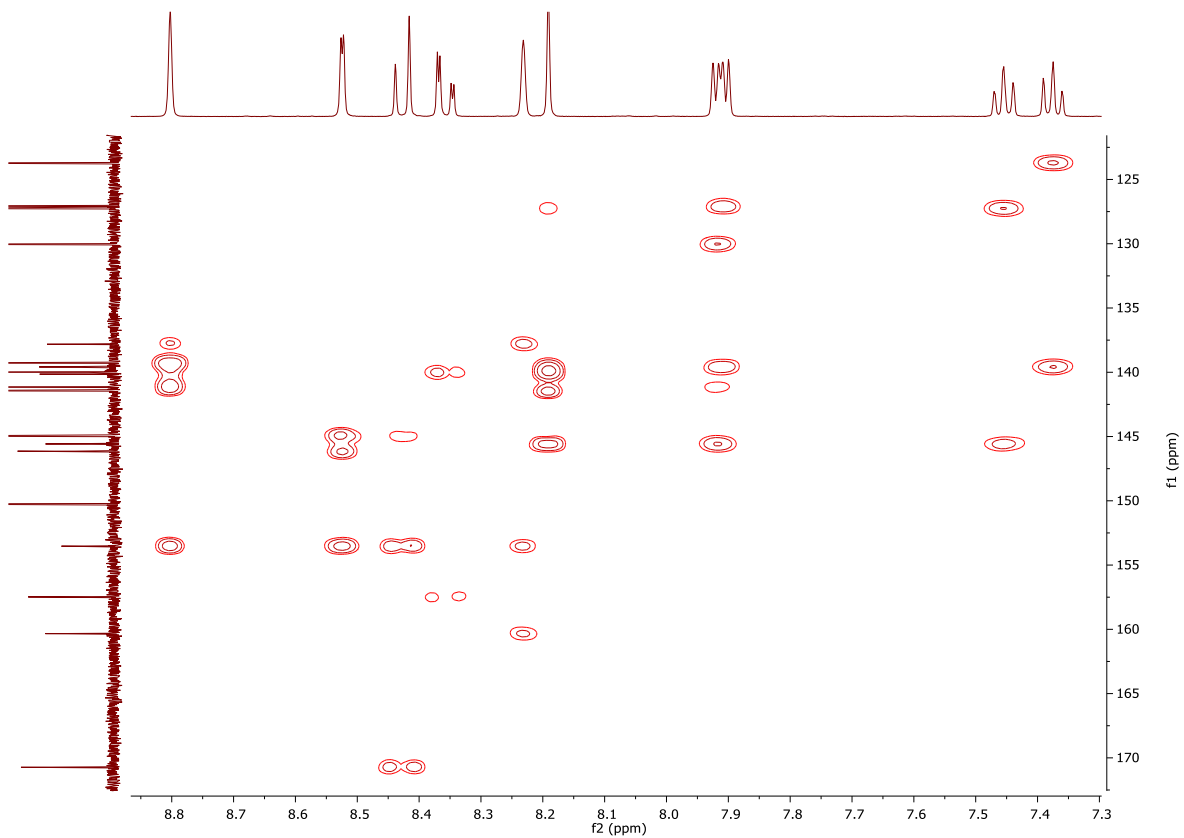

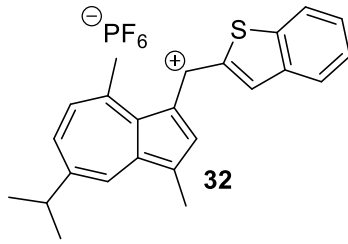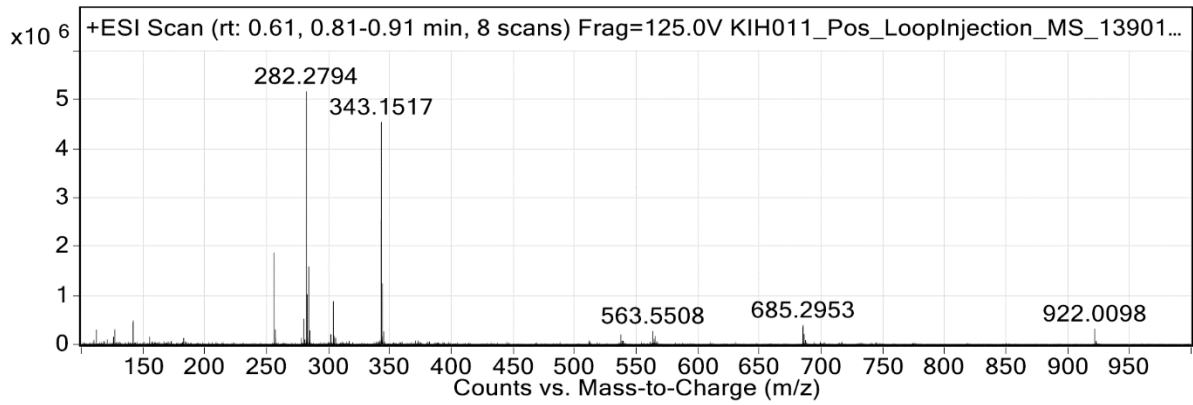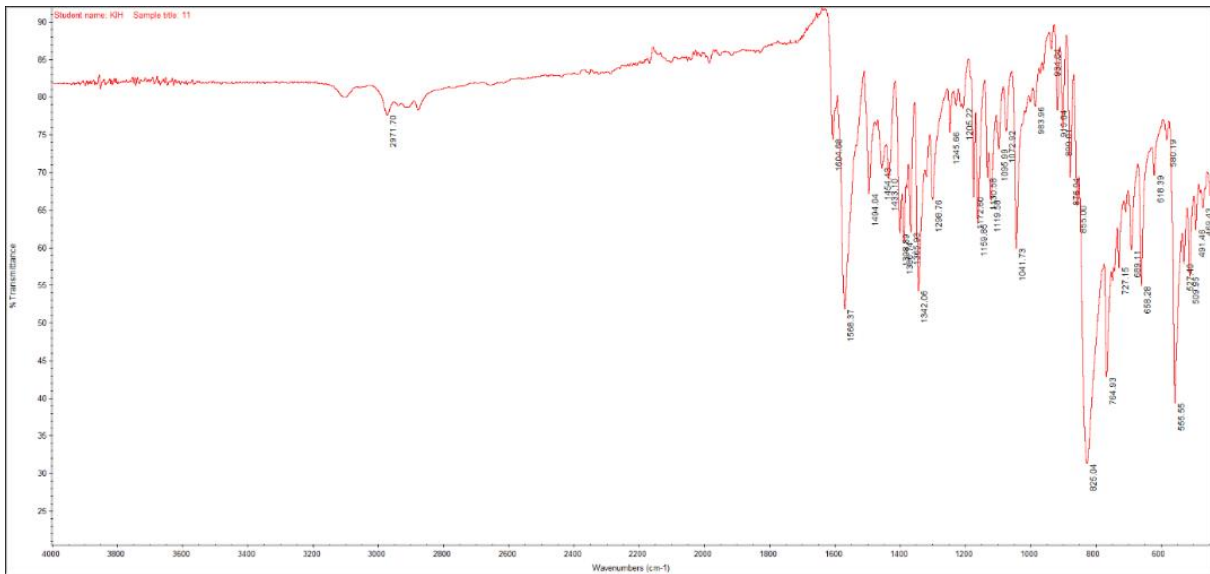

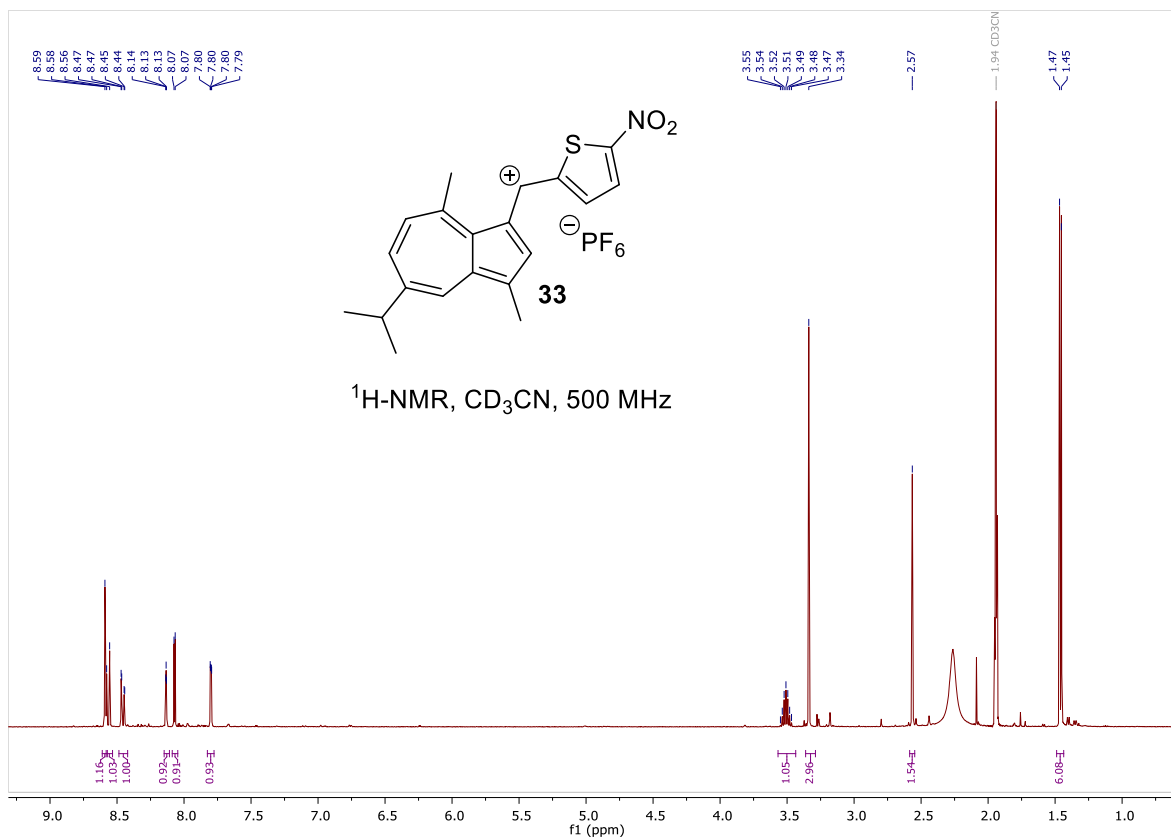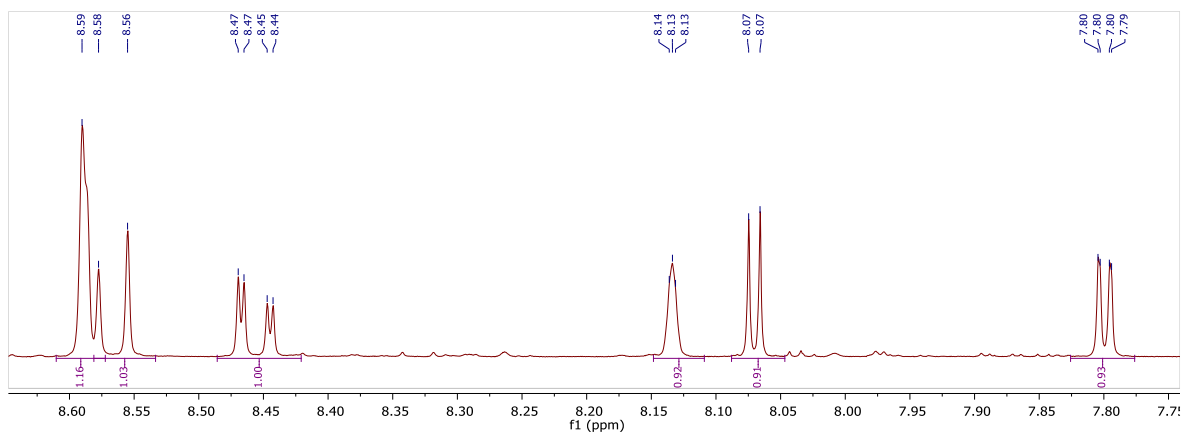



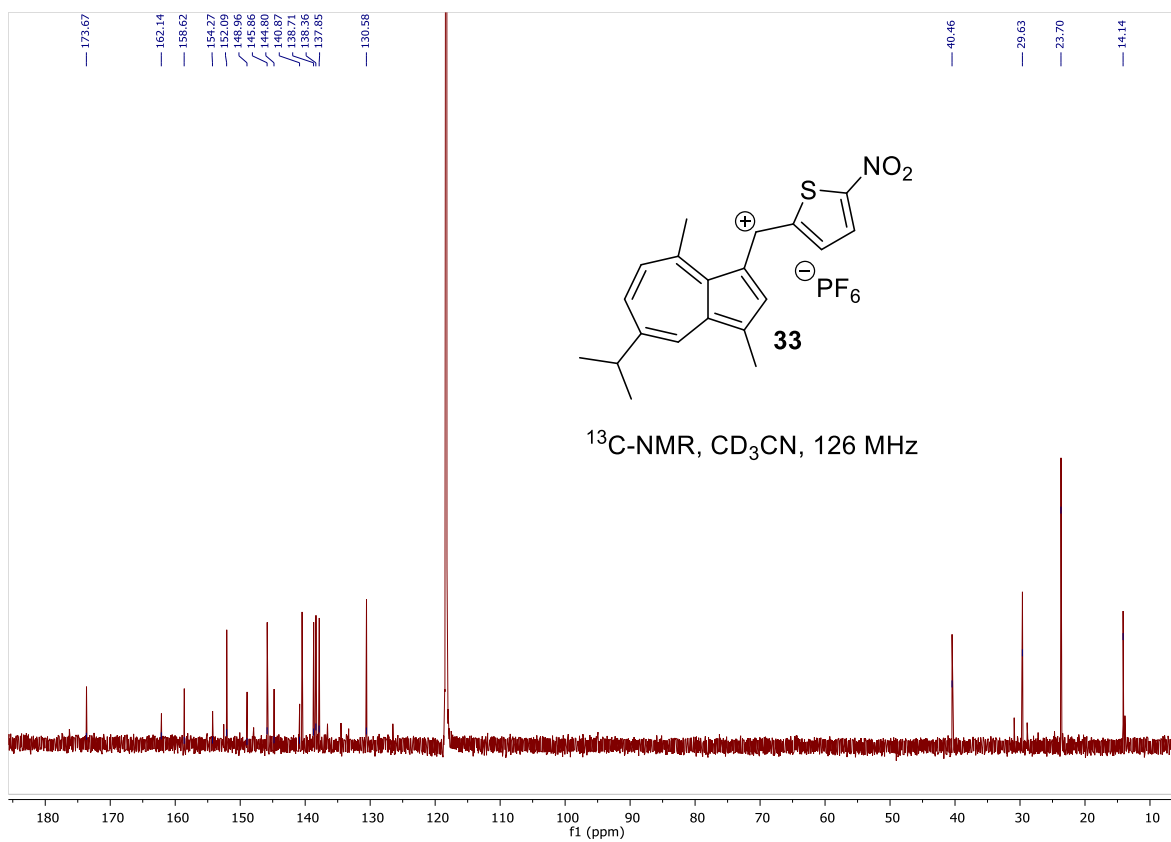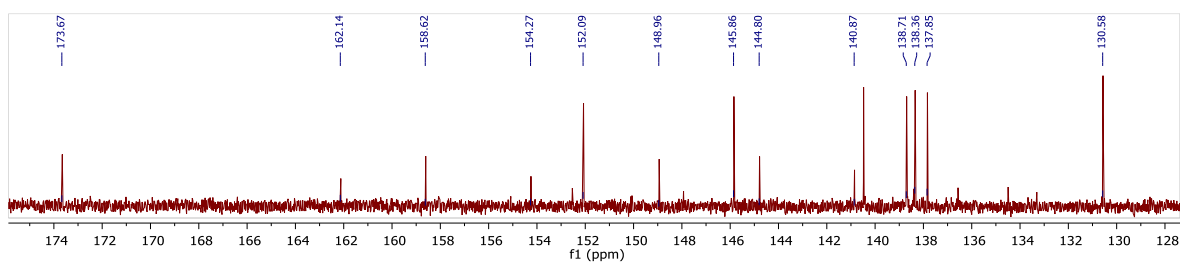

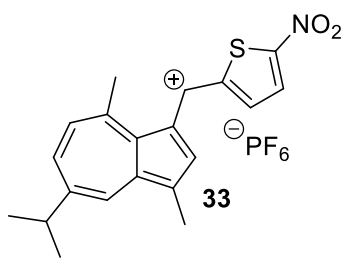

COSY, CD<sub>3</sub>CN

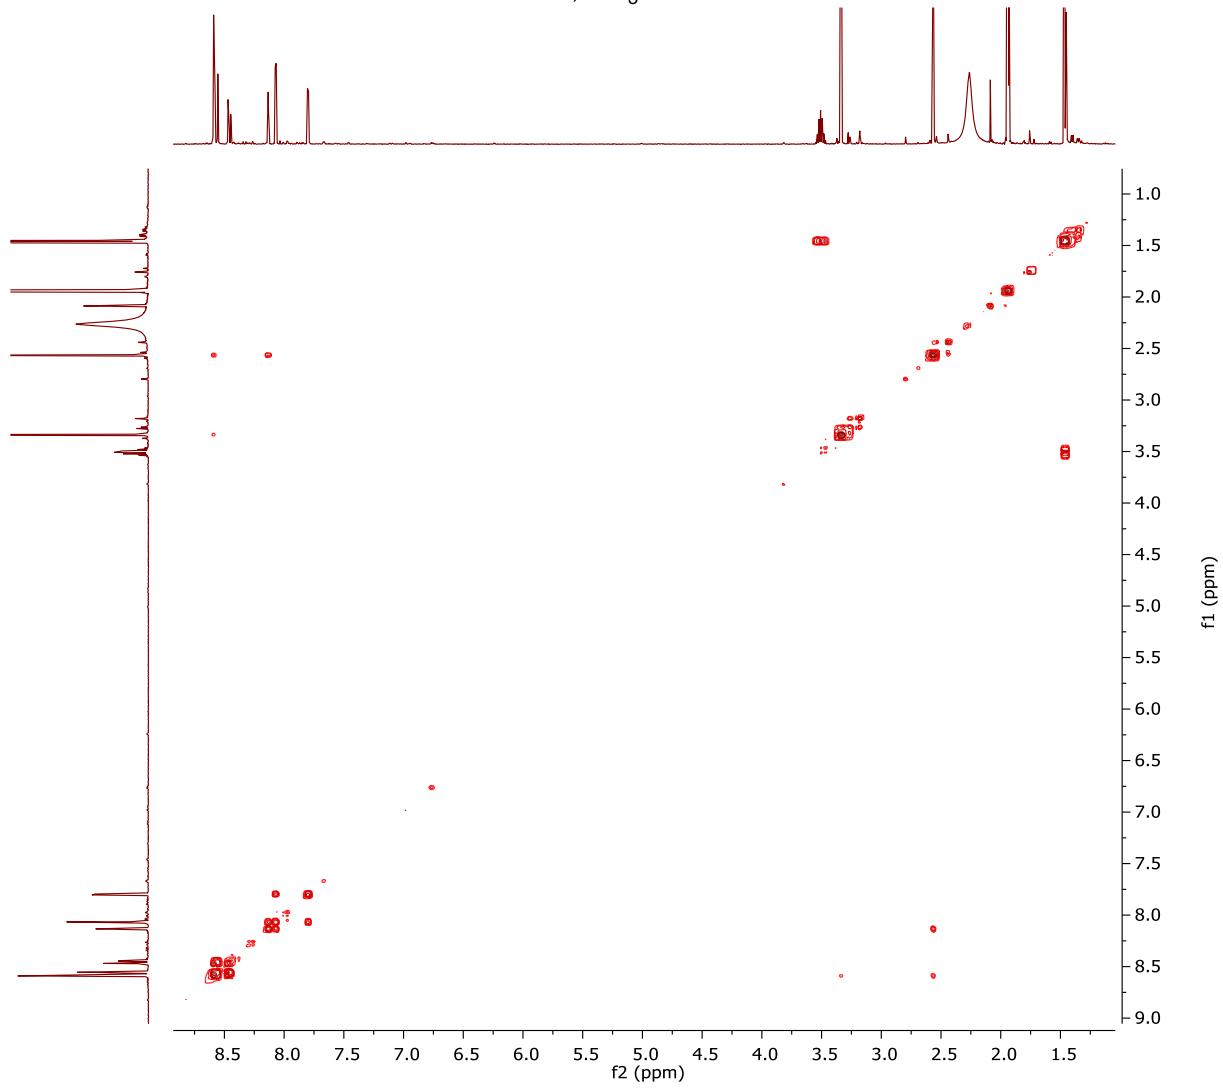

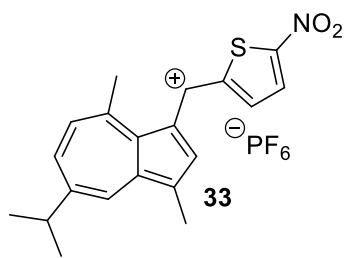

NOESY, CD<sub>3</sub>CN

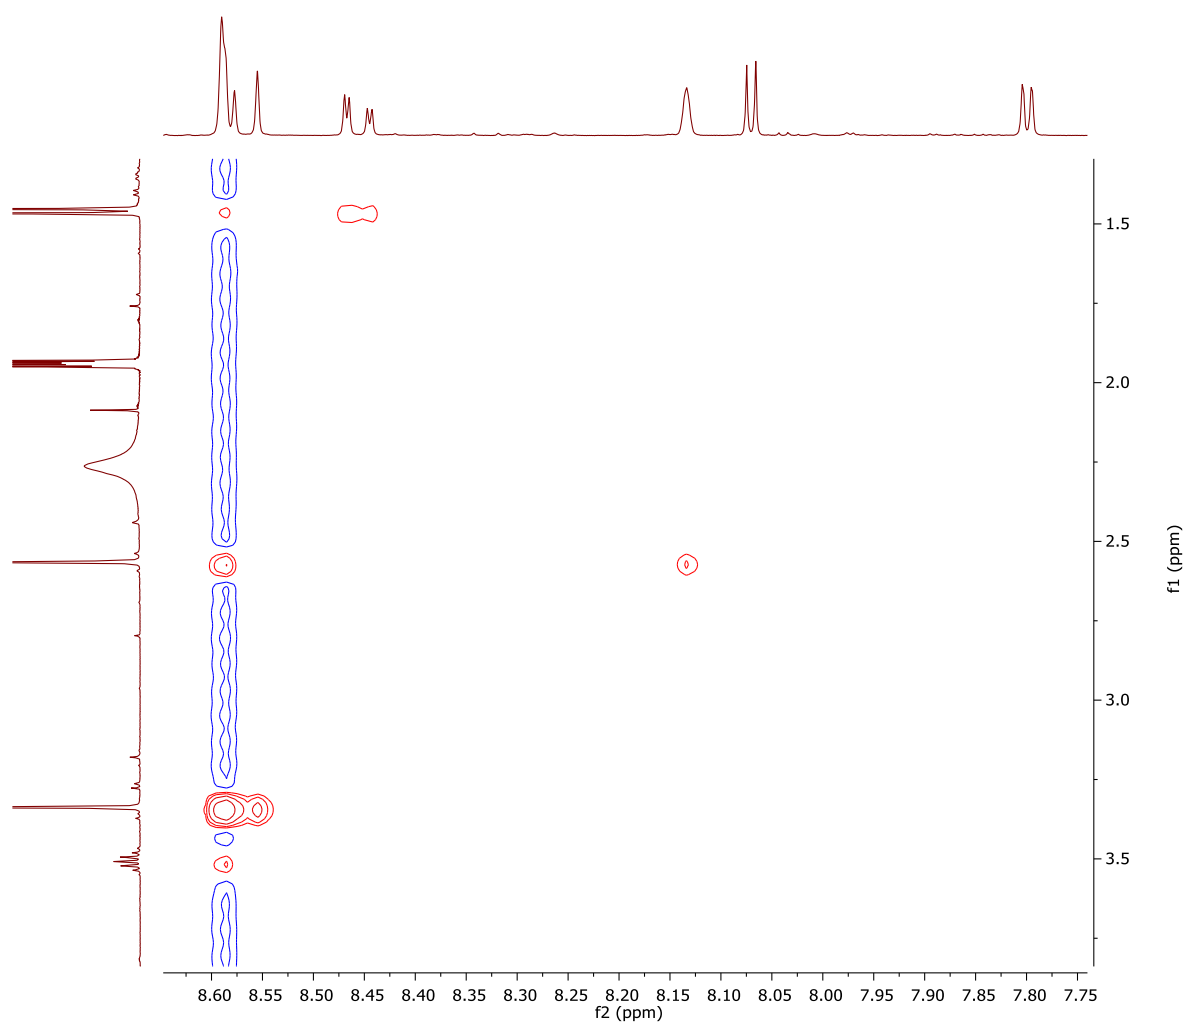

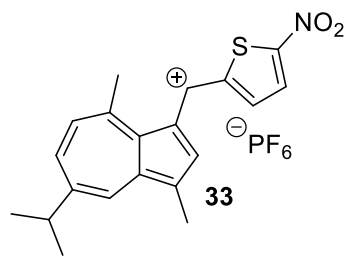

HSQC, CD<sub>3</sub>CN

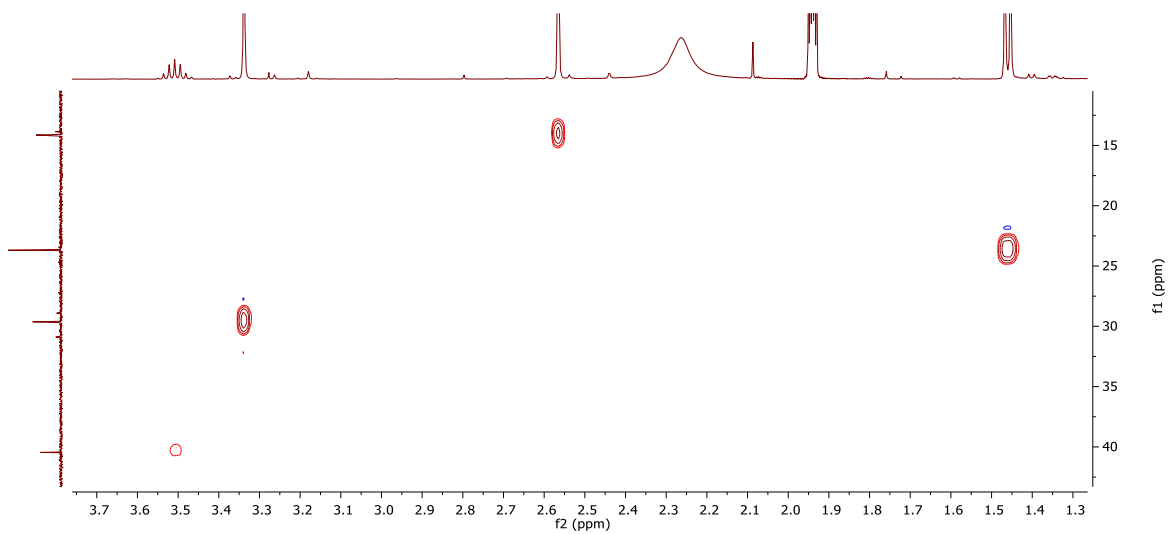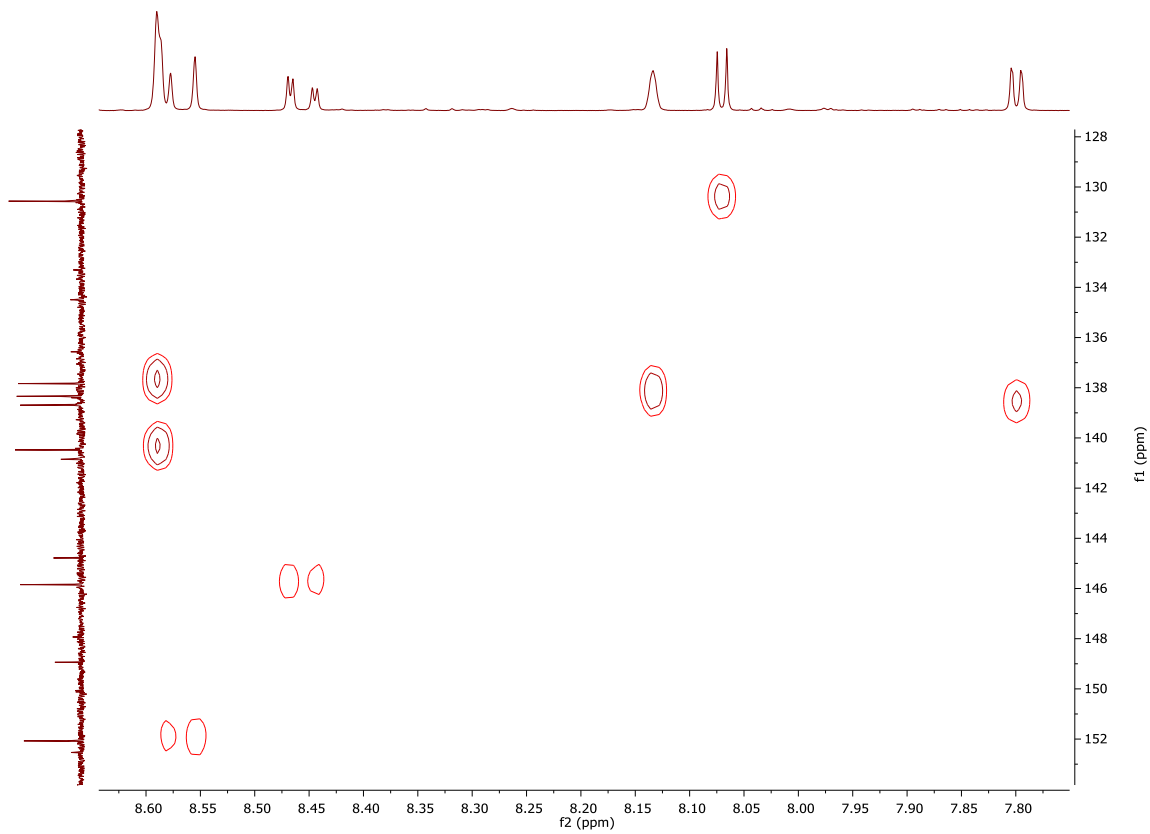

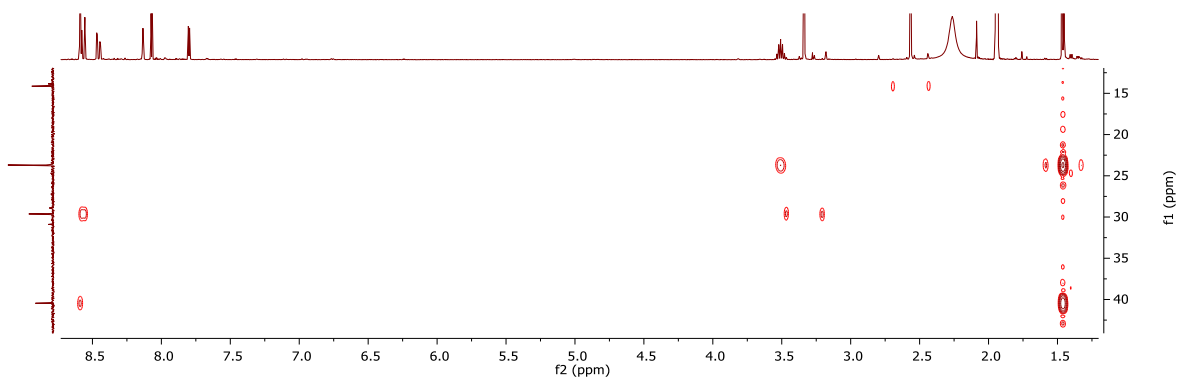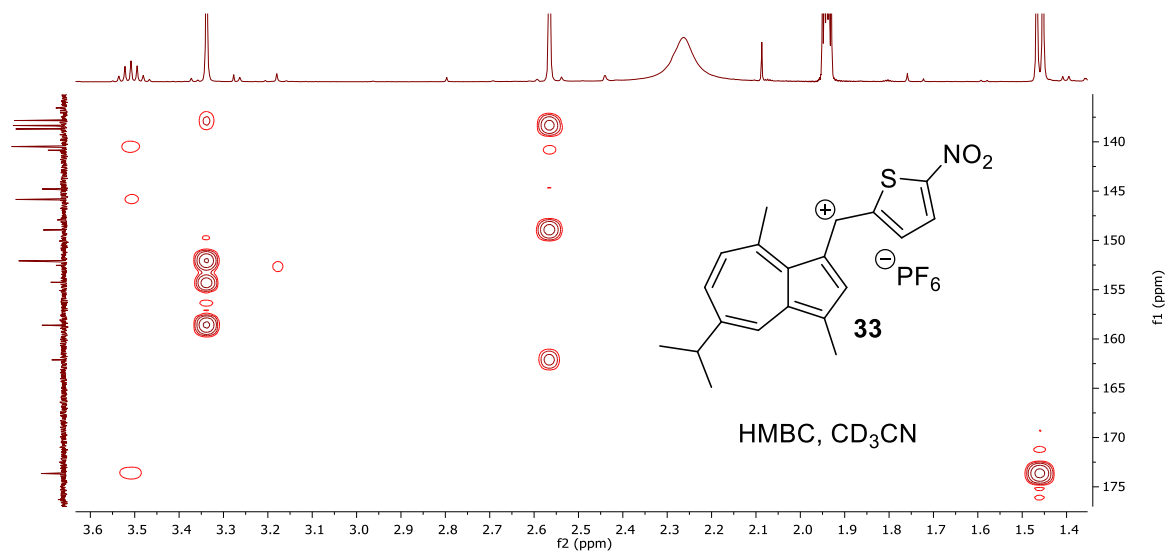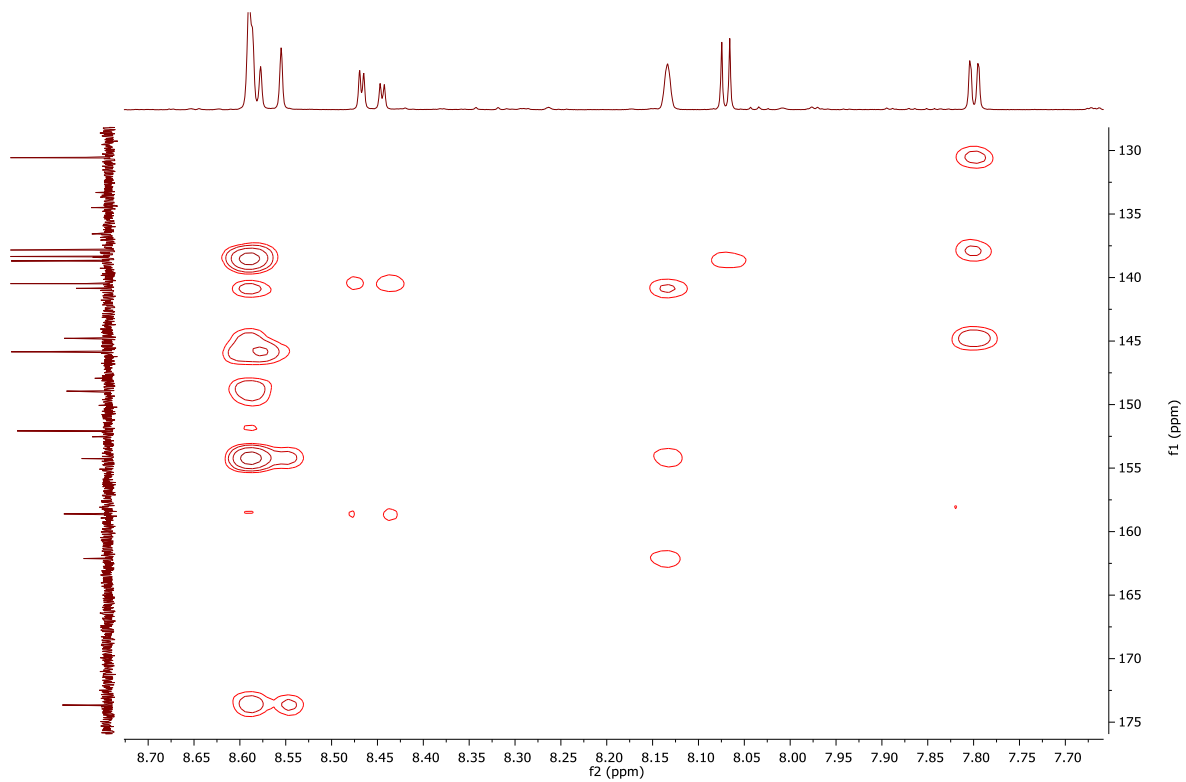

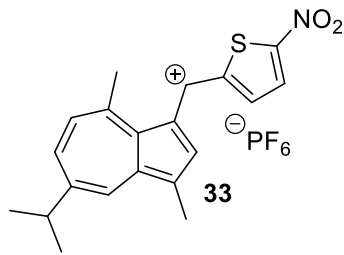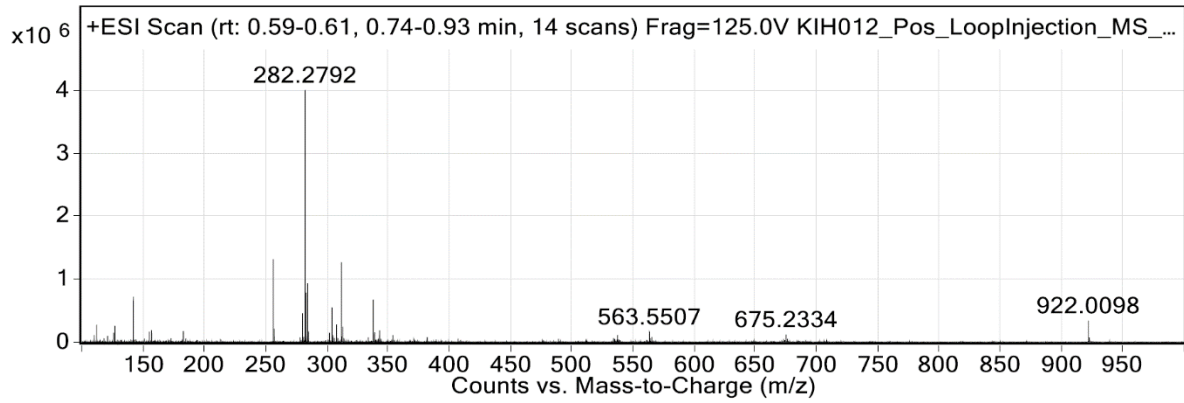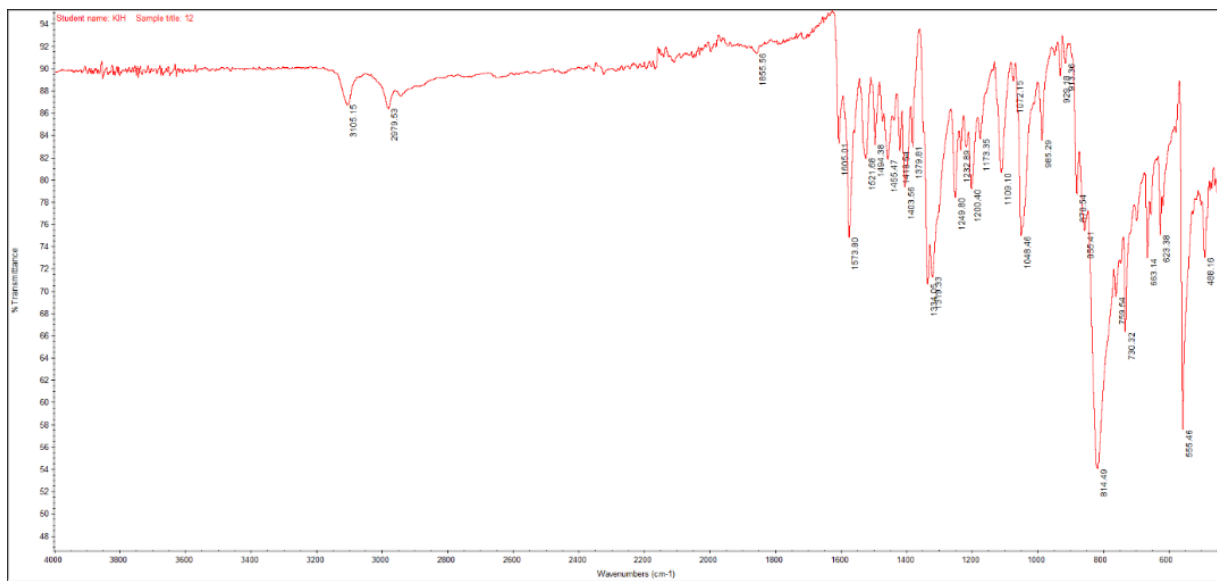

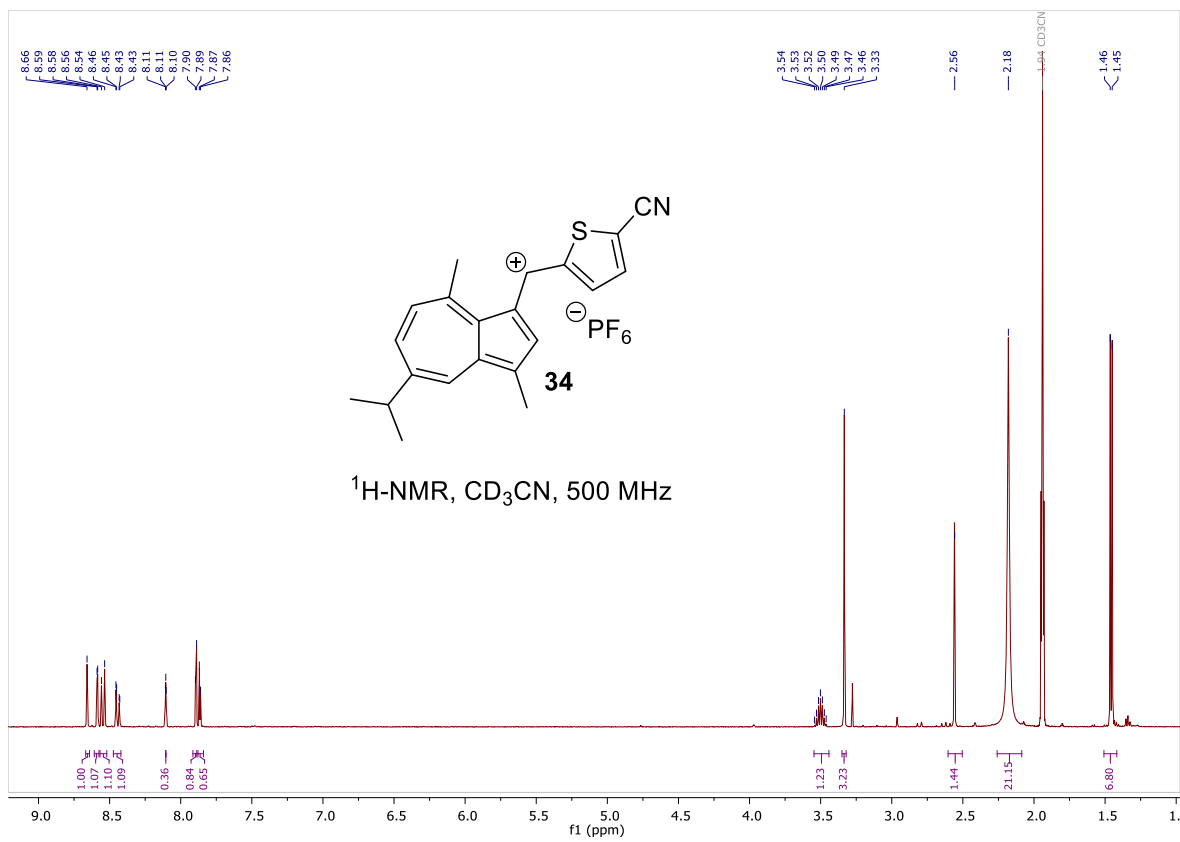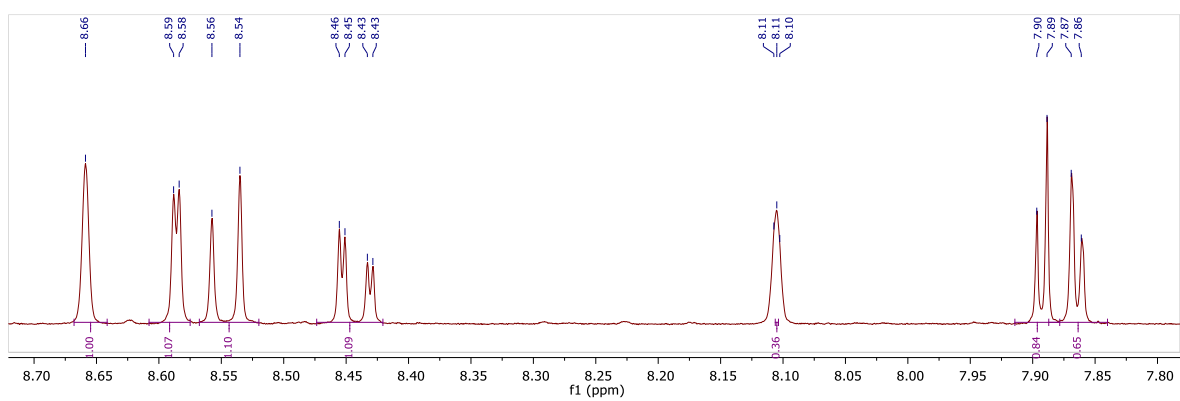

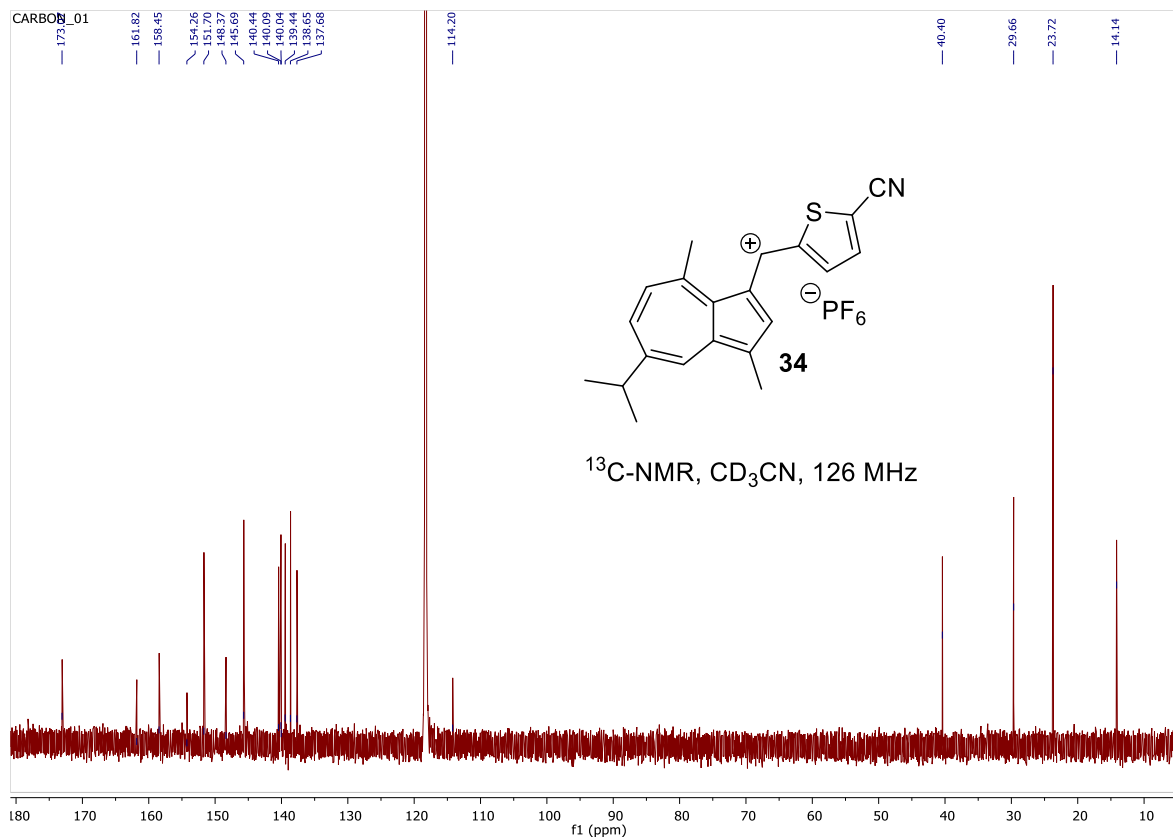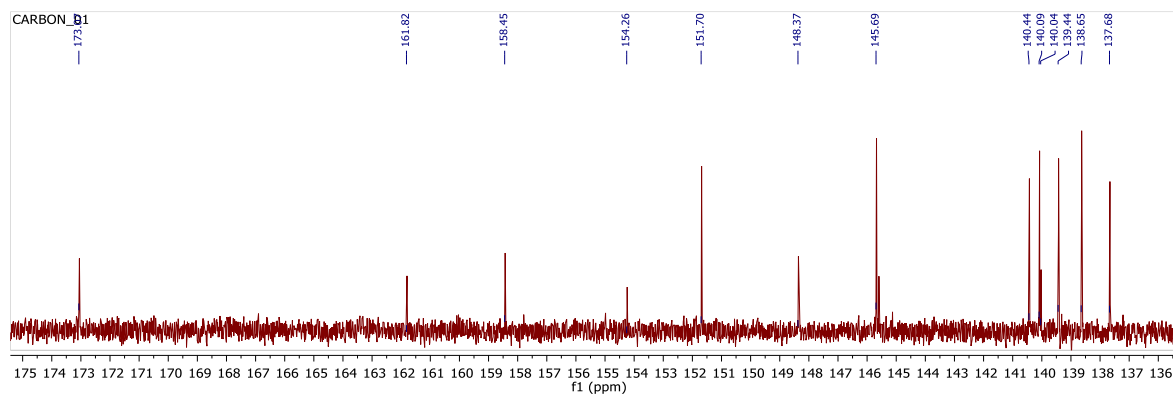



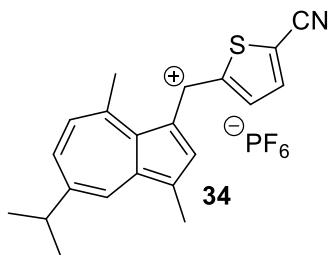

COSY, CD<sub>3</sub>CN

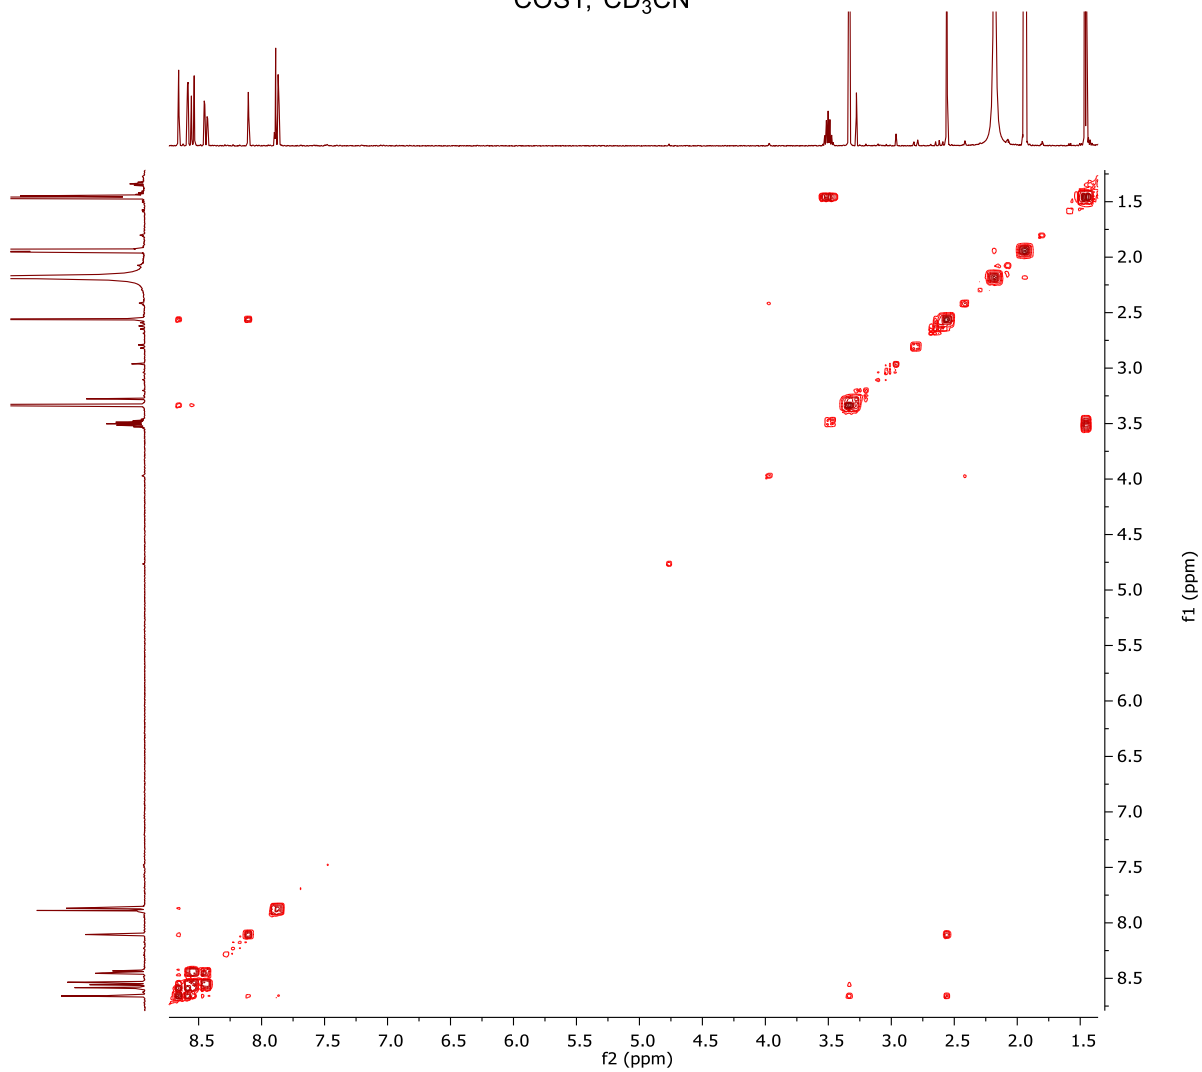

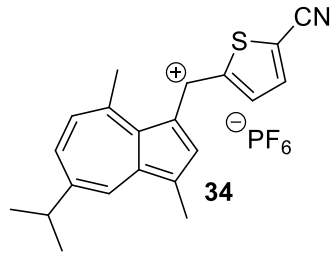

NOESY, CD<sub>3</sub>CN

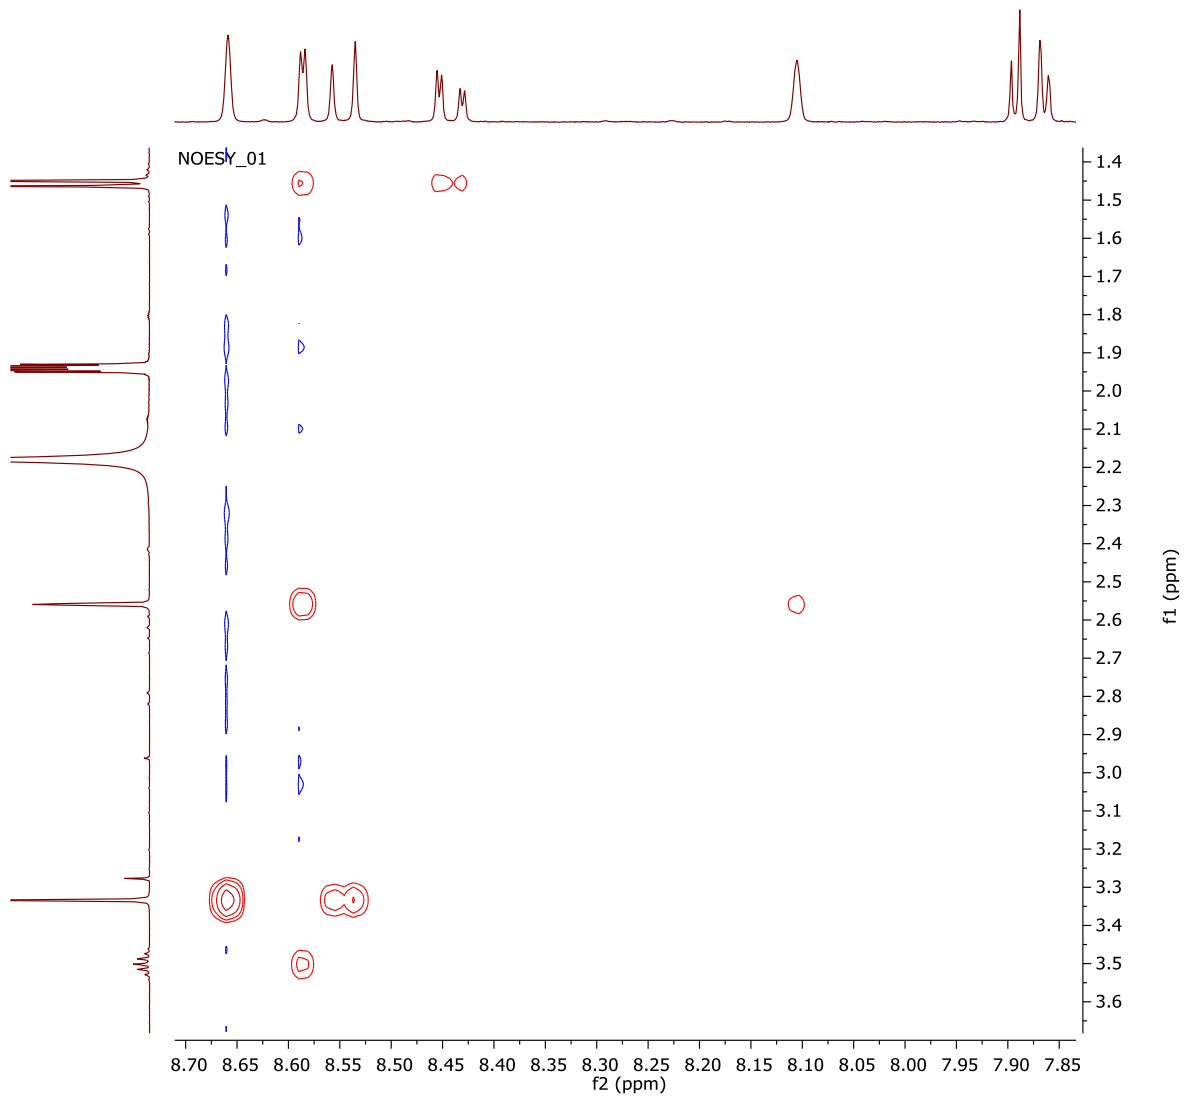

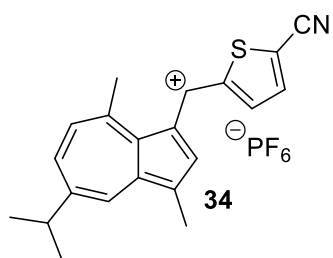

HSQC, CD<sub>3</sub>CN

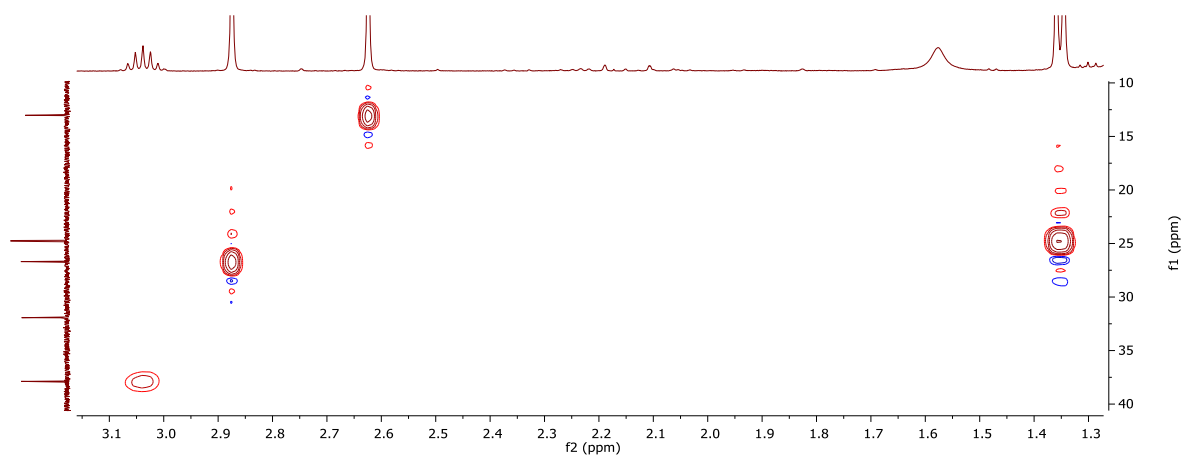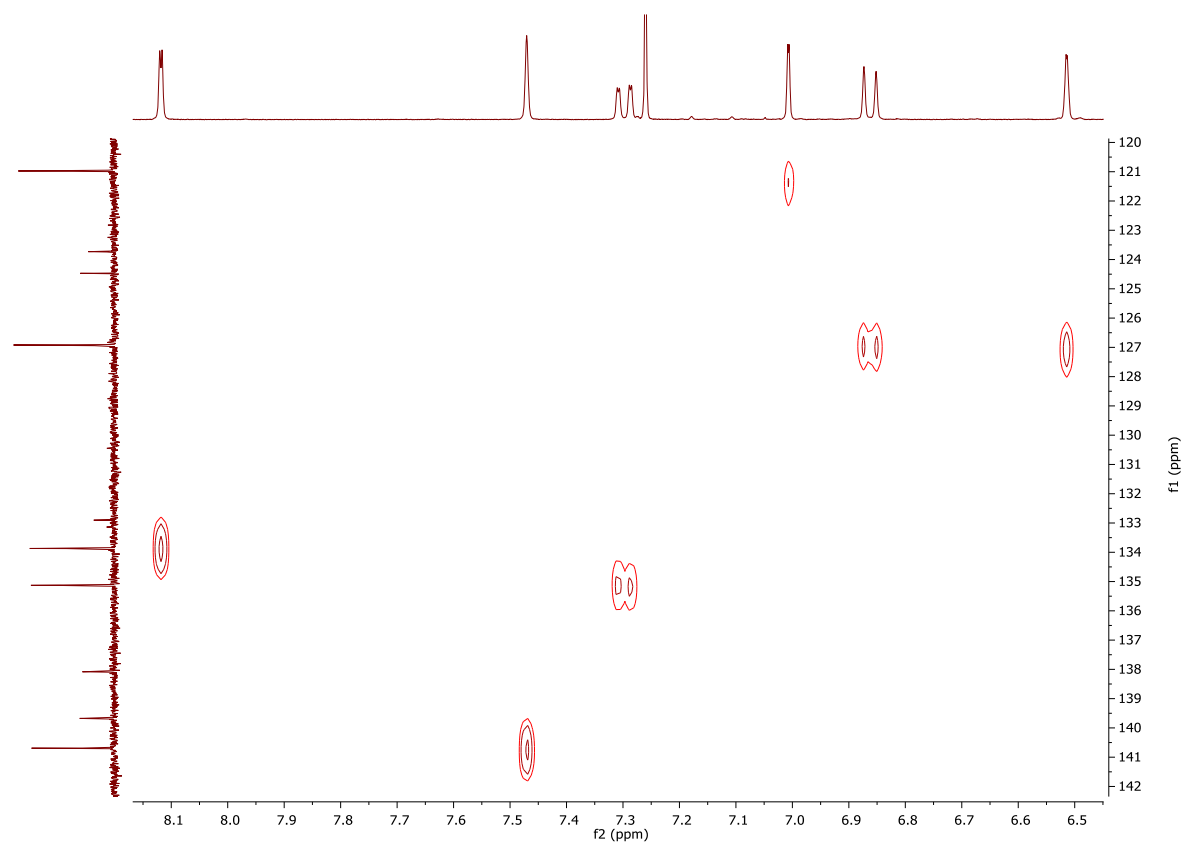

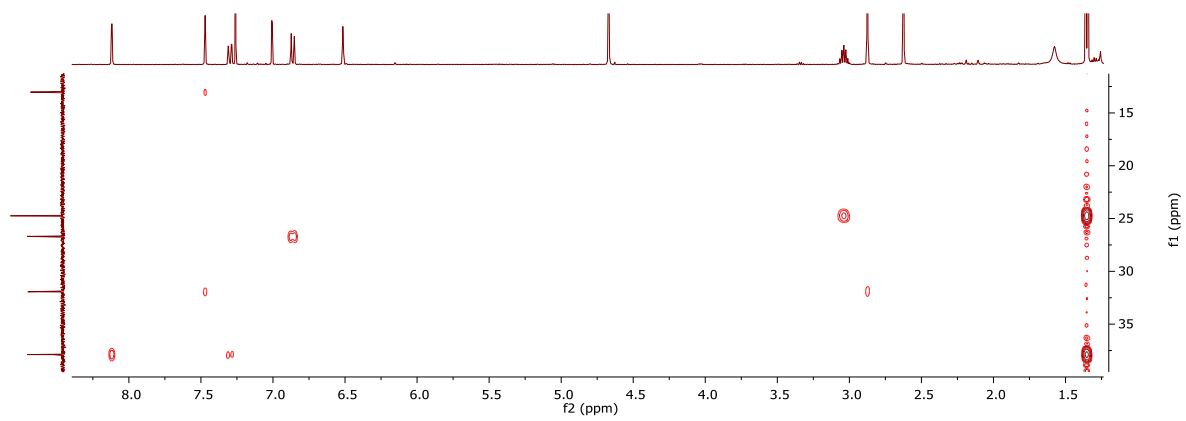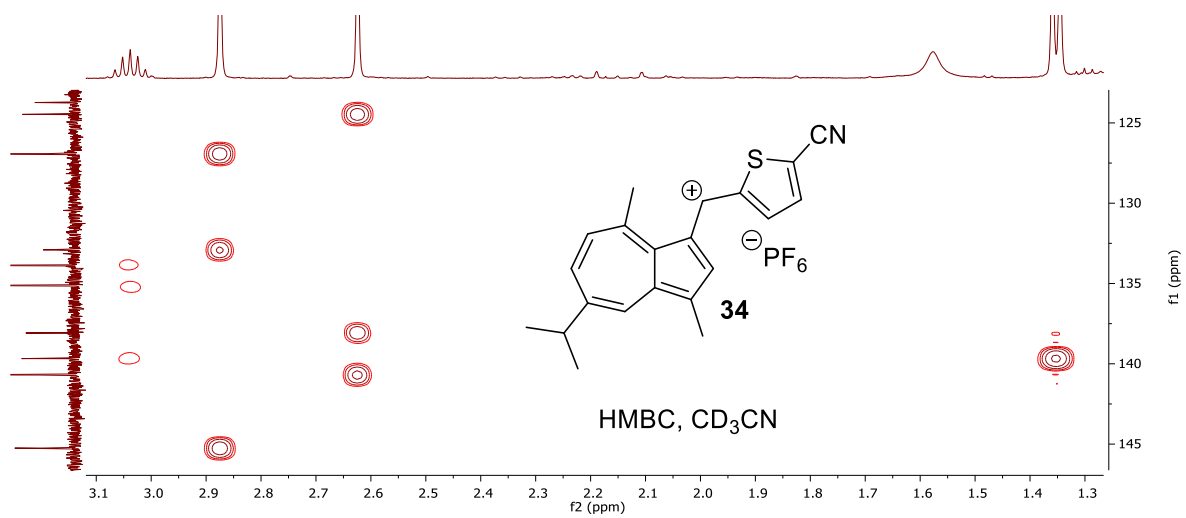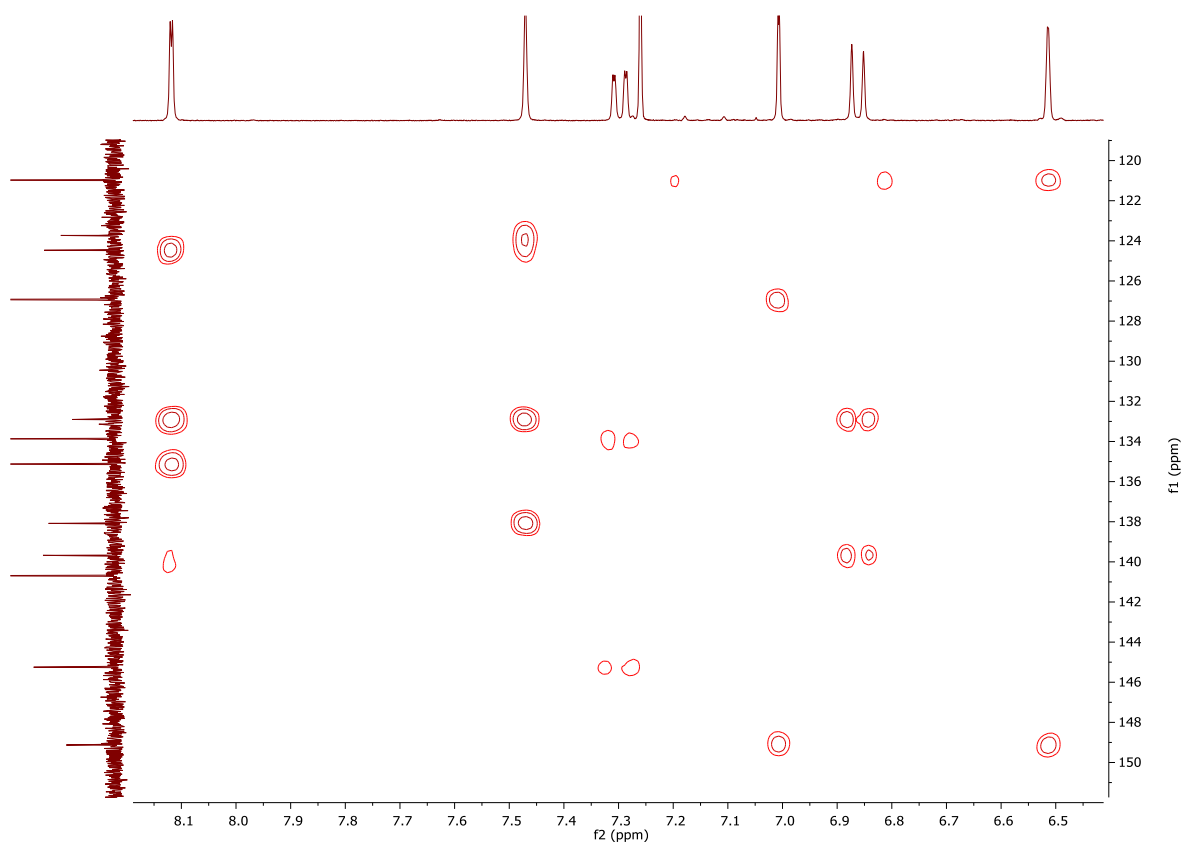

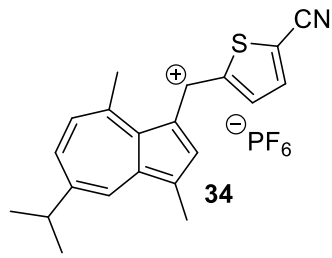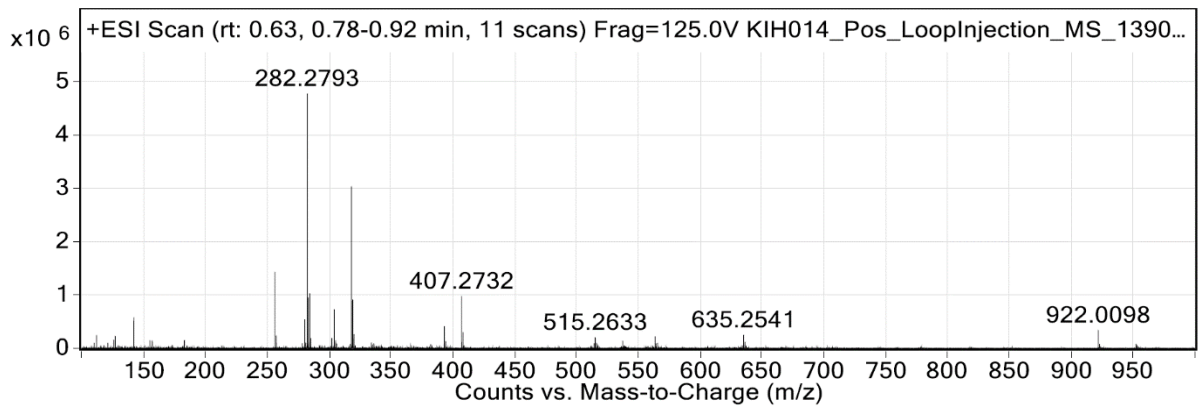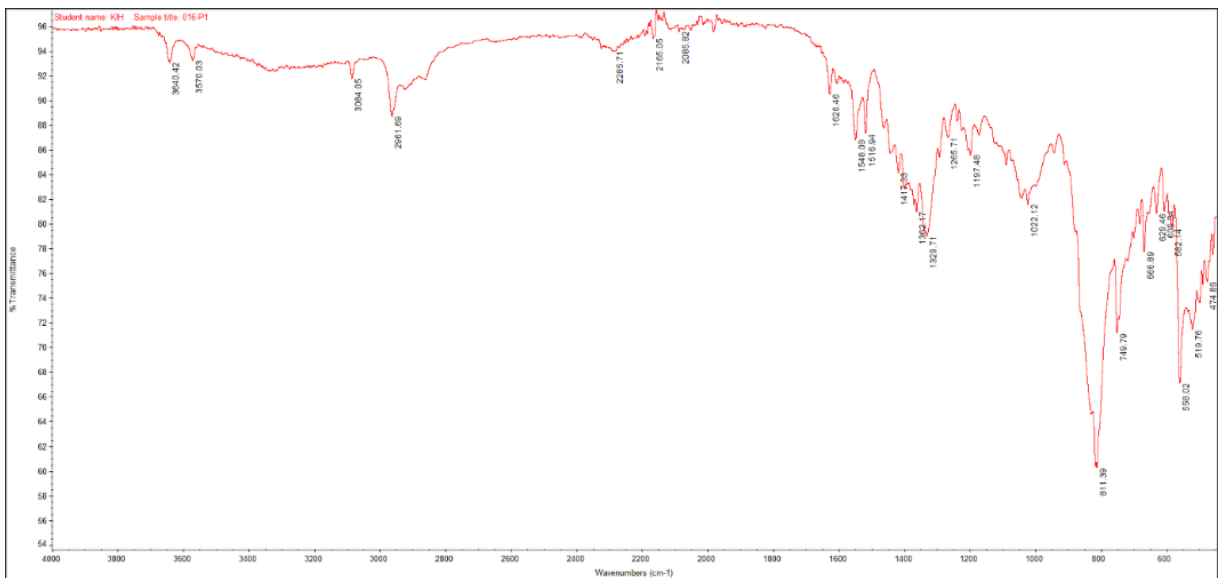

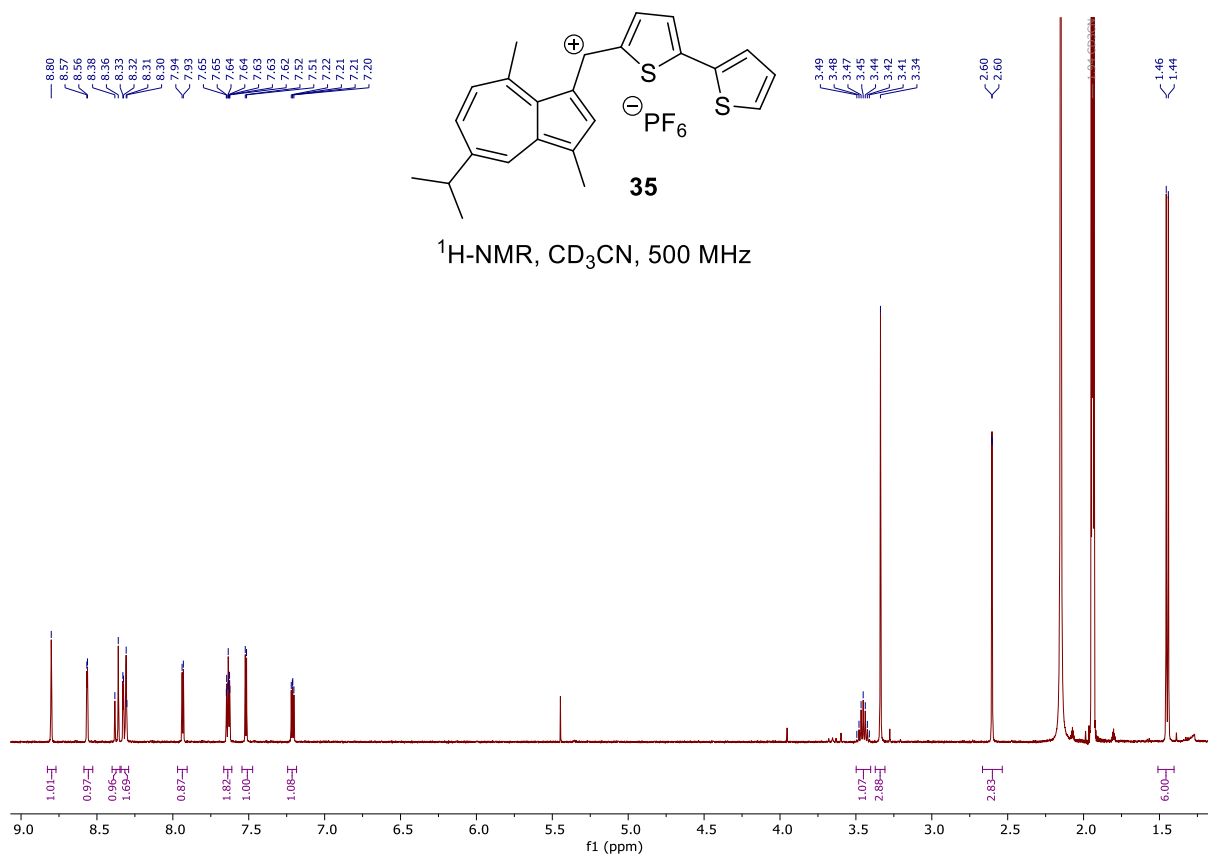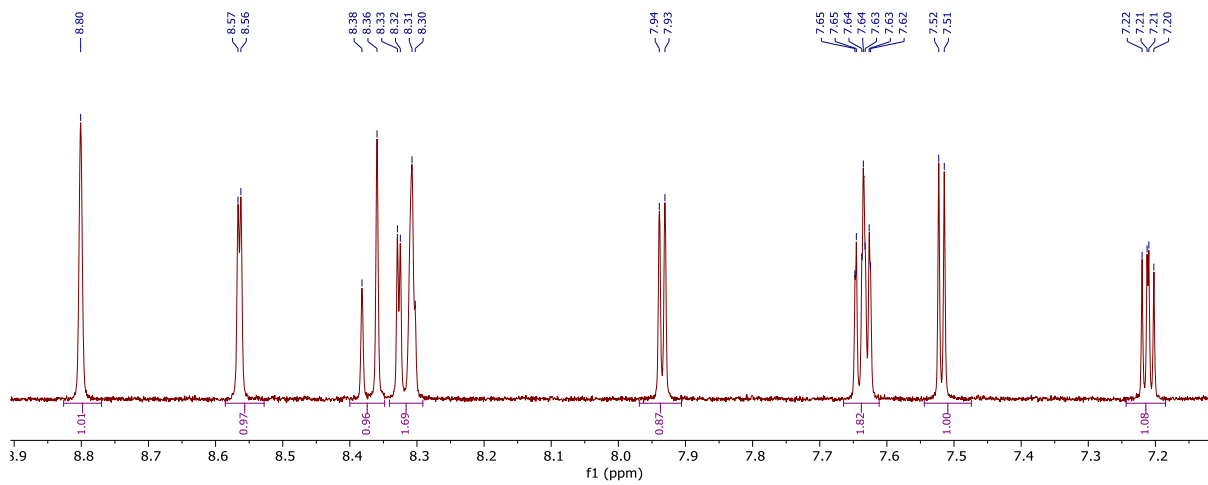

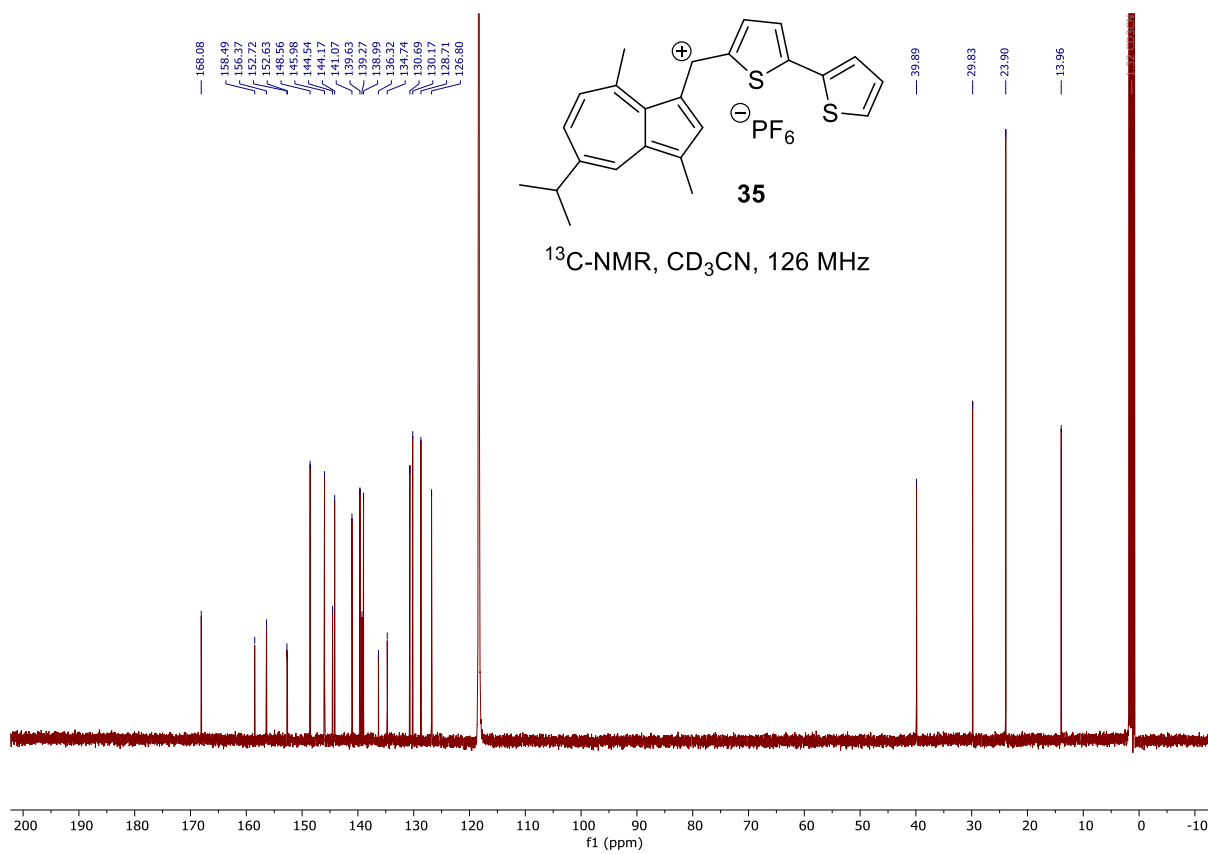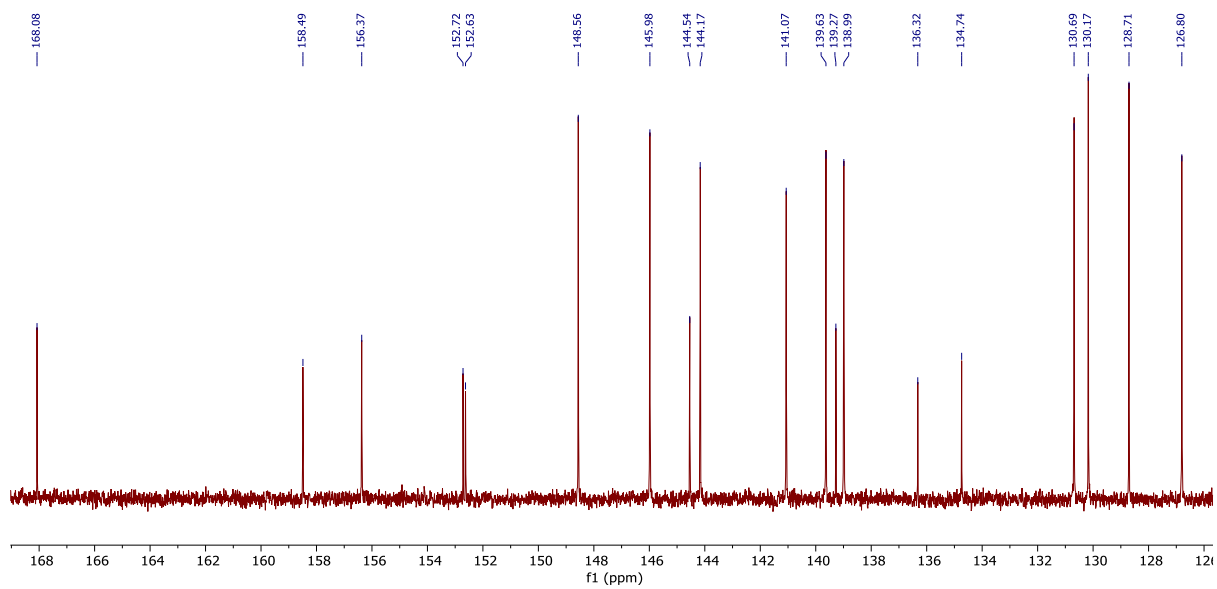

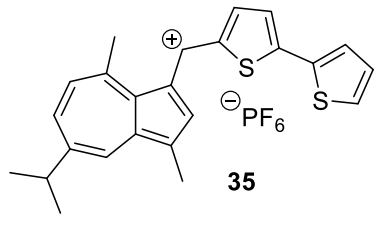

COSY, CD<sub>3</sub>CN

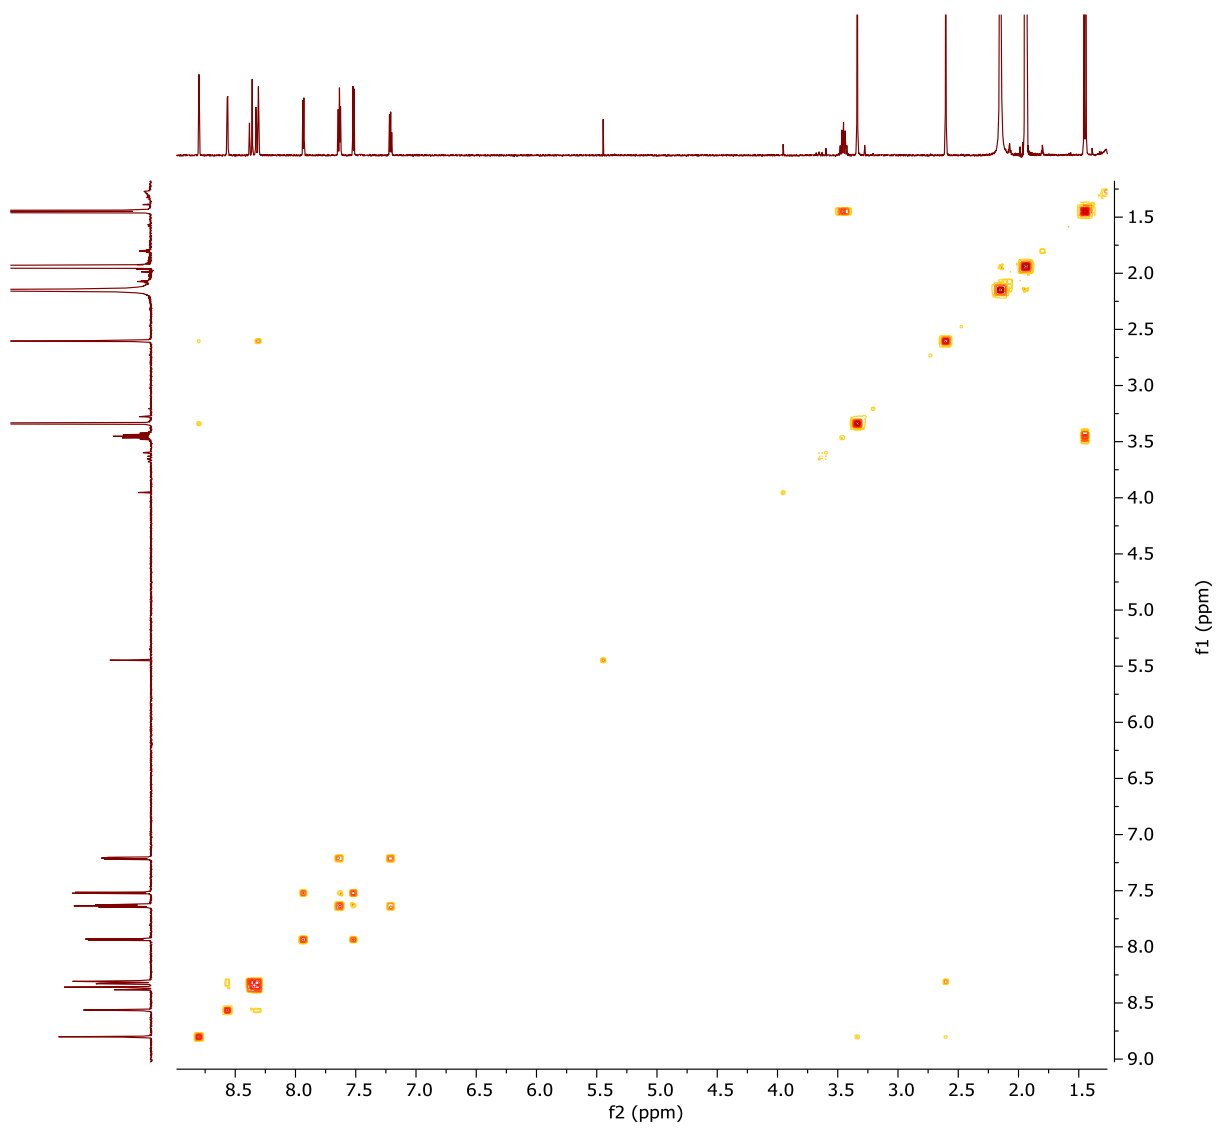



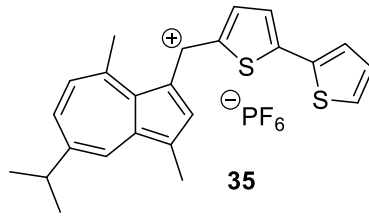

NOESY, CD<sub>3</sub>CN

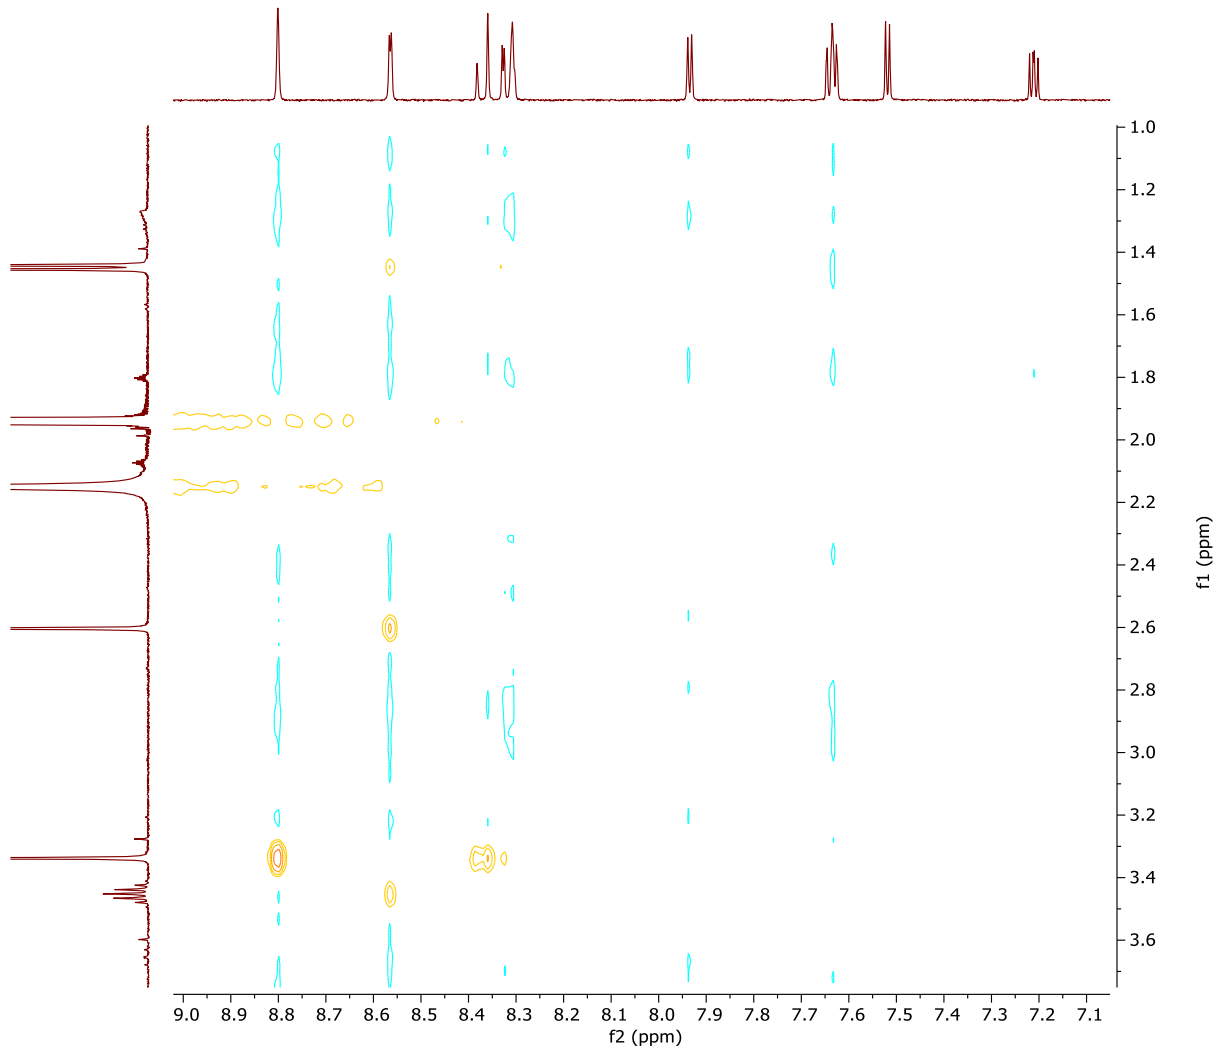

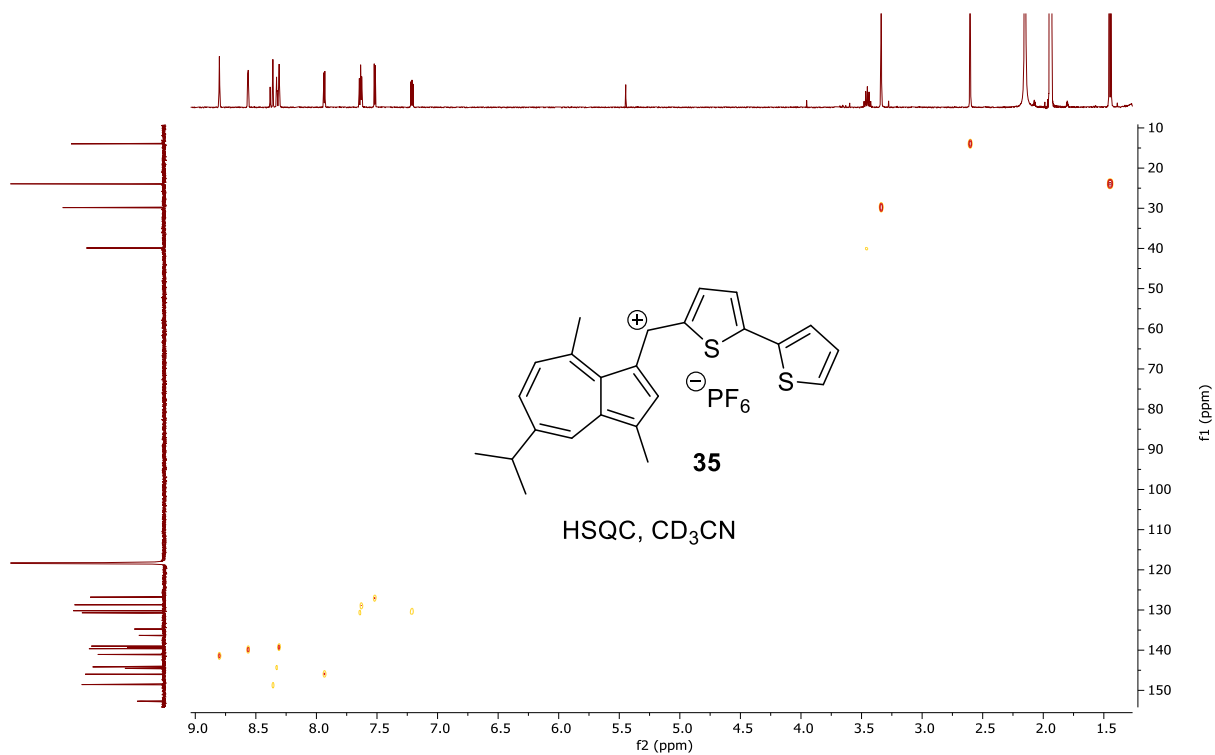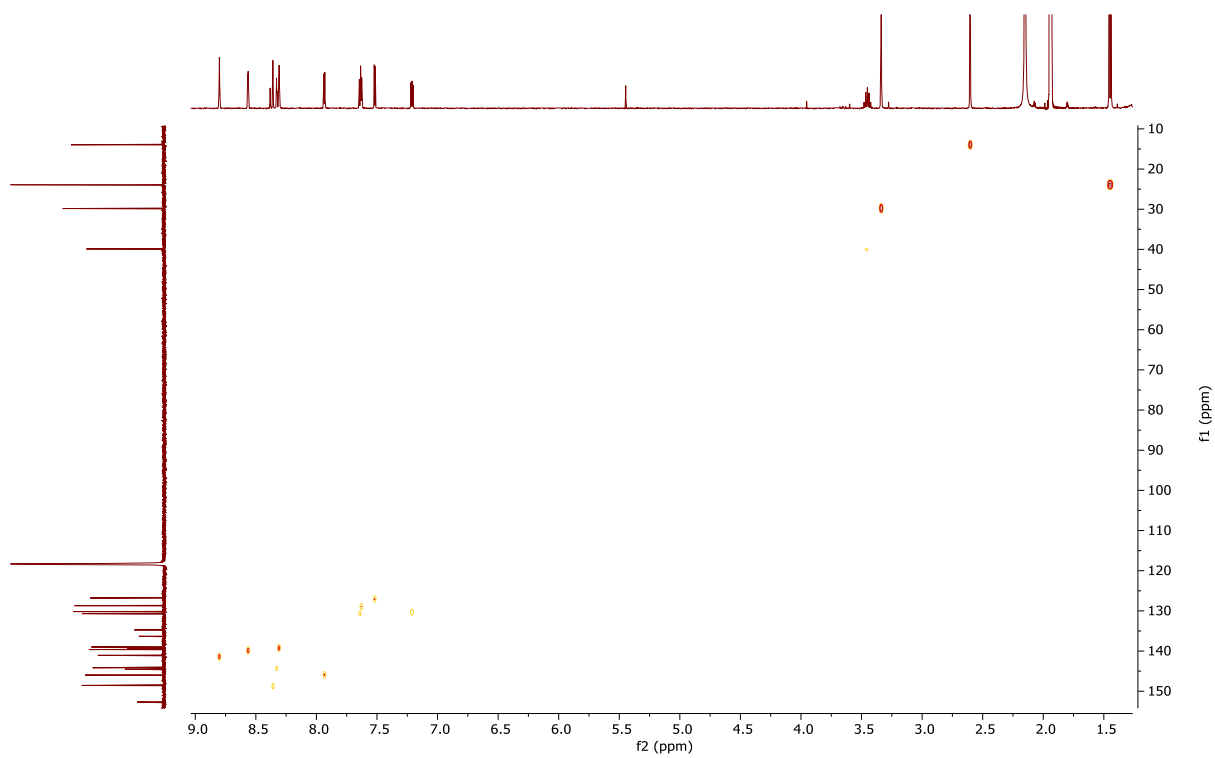

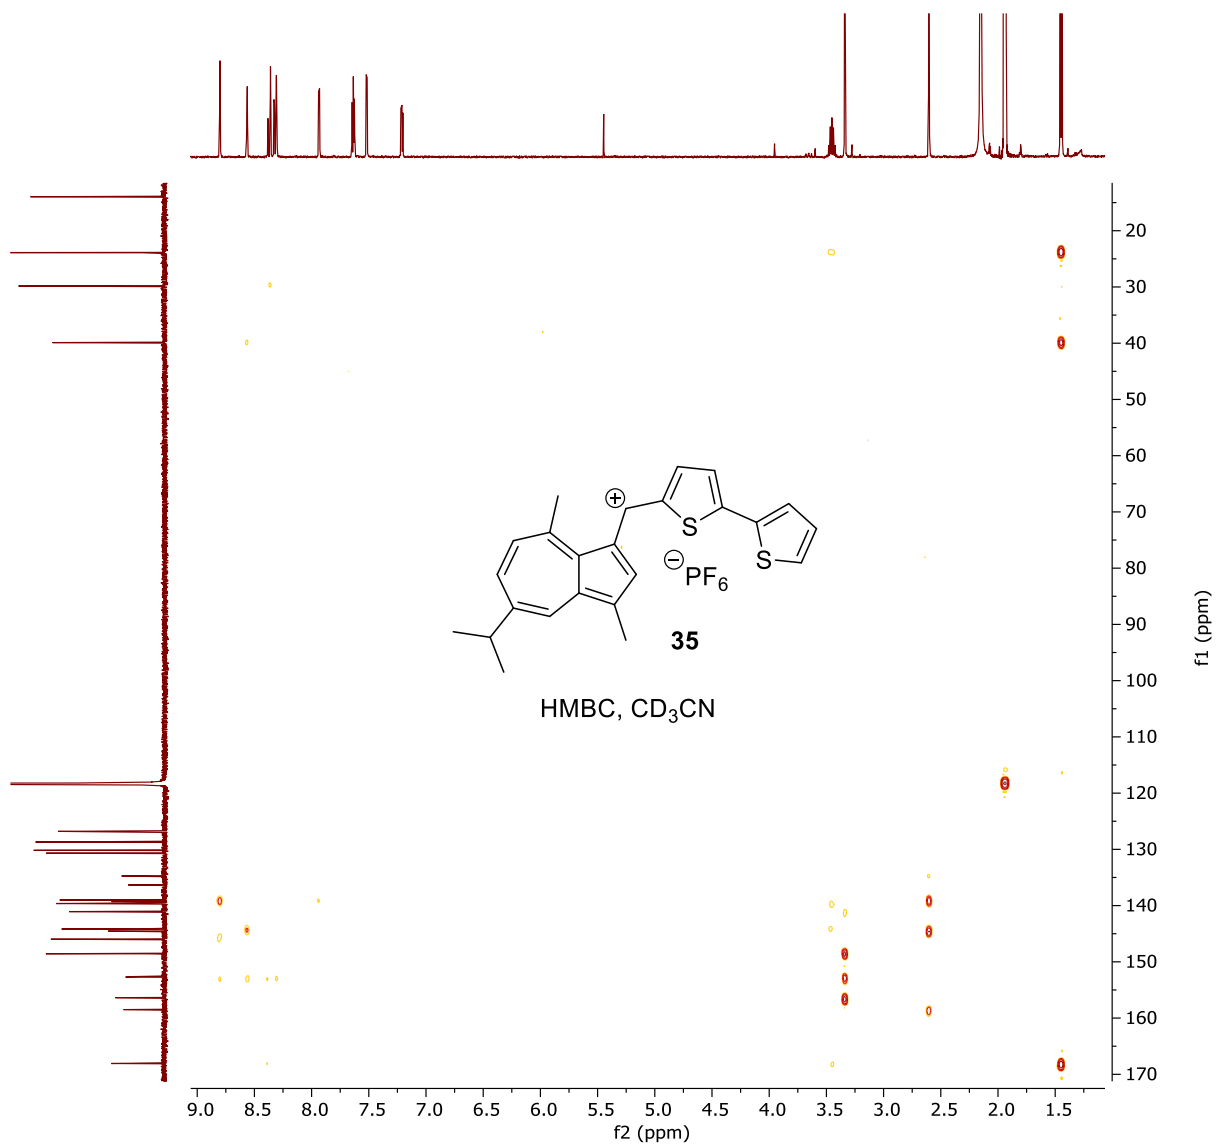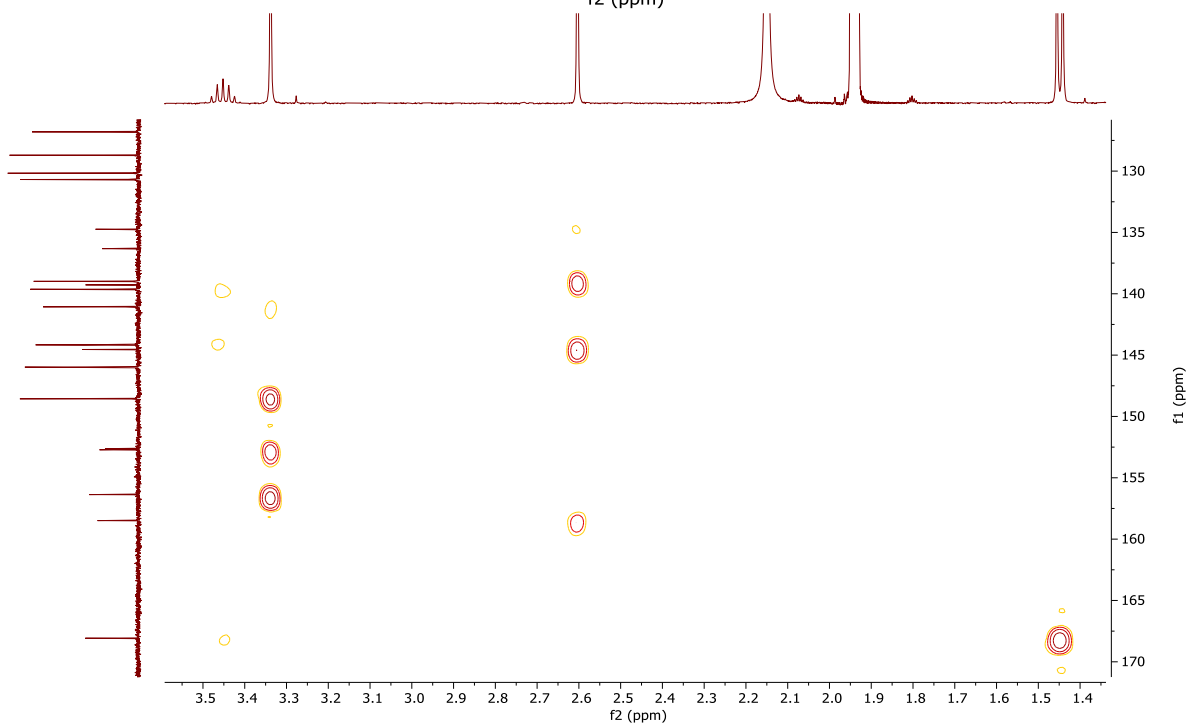

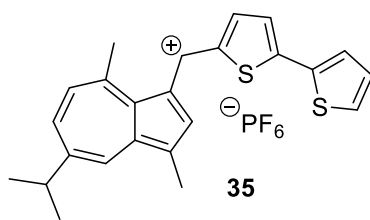

HMBC, CD<sub>3</sub>CN

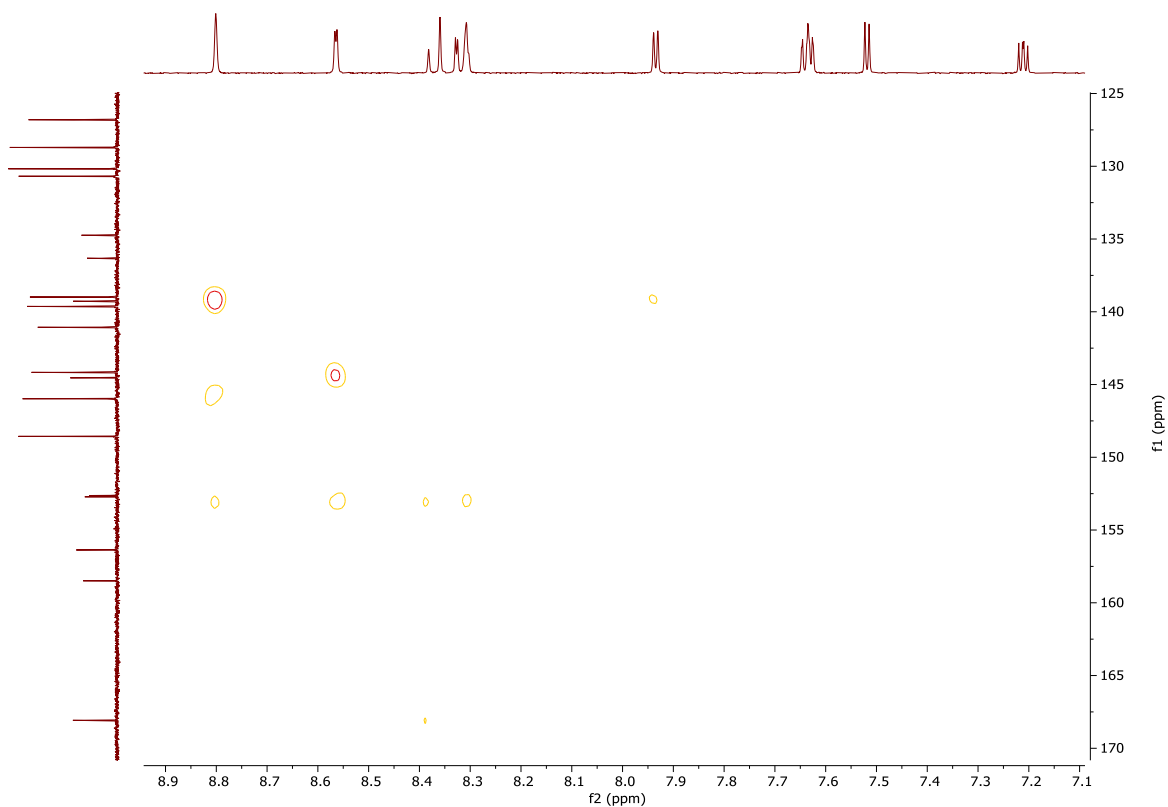

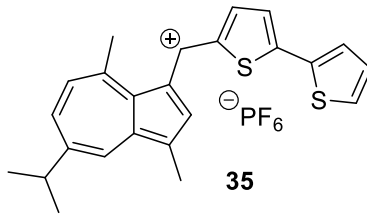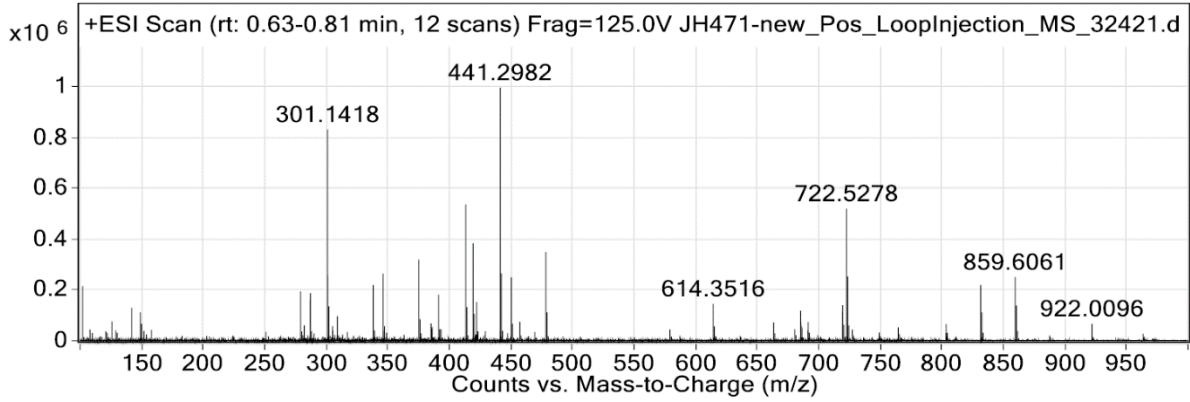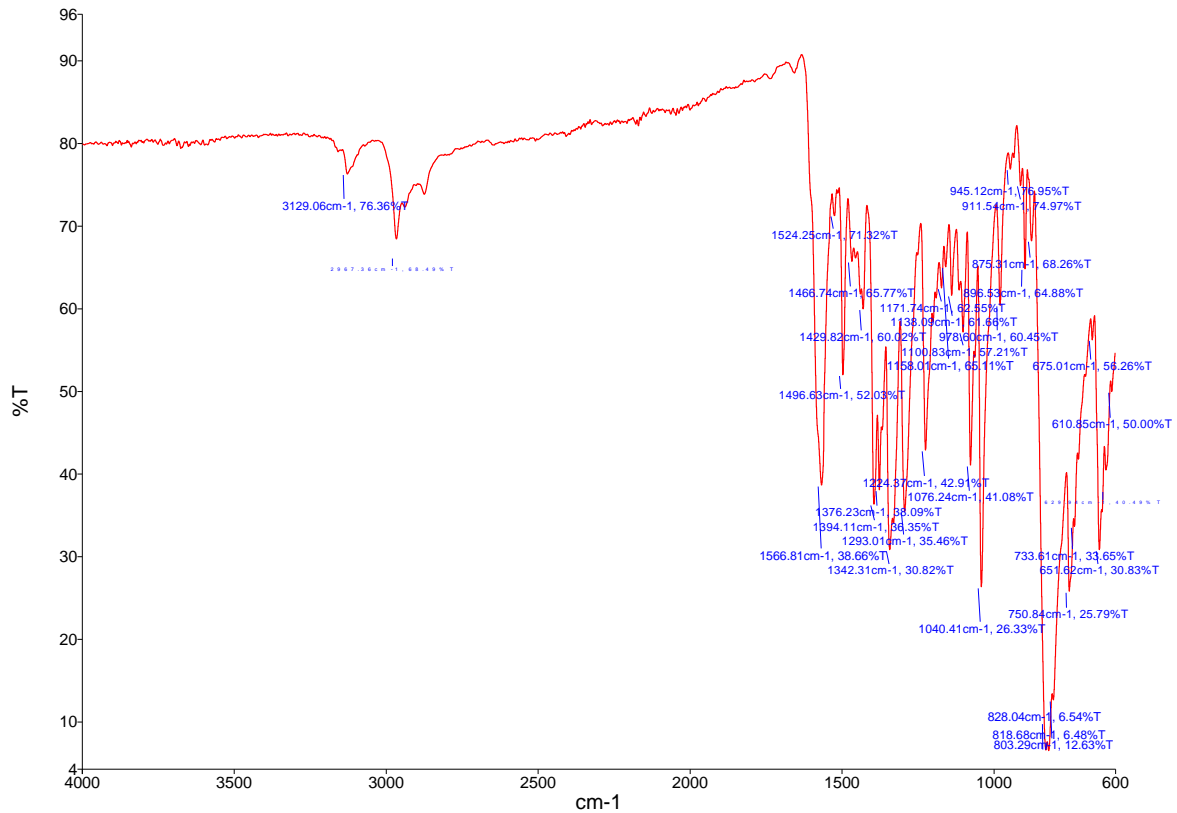

Name: iruser1 8587  
 Description: Sample 8587 By iruser1 Date Friday, November 18 2022

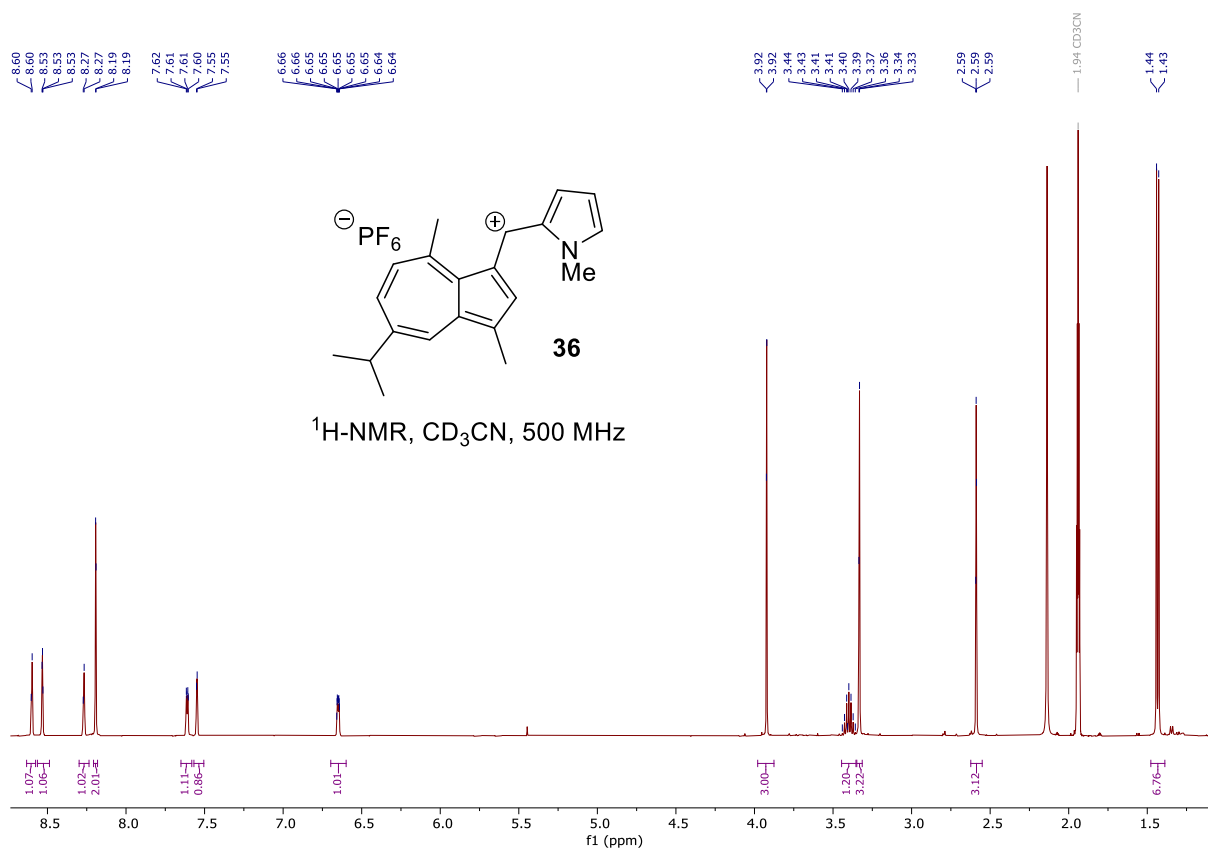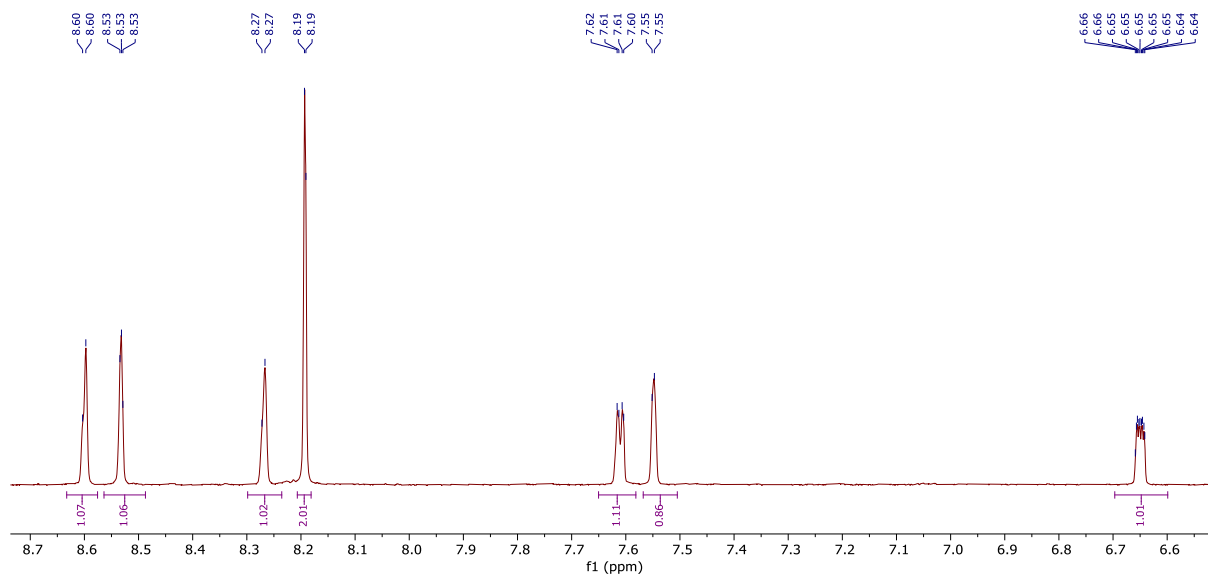

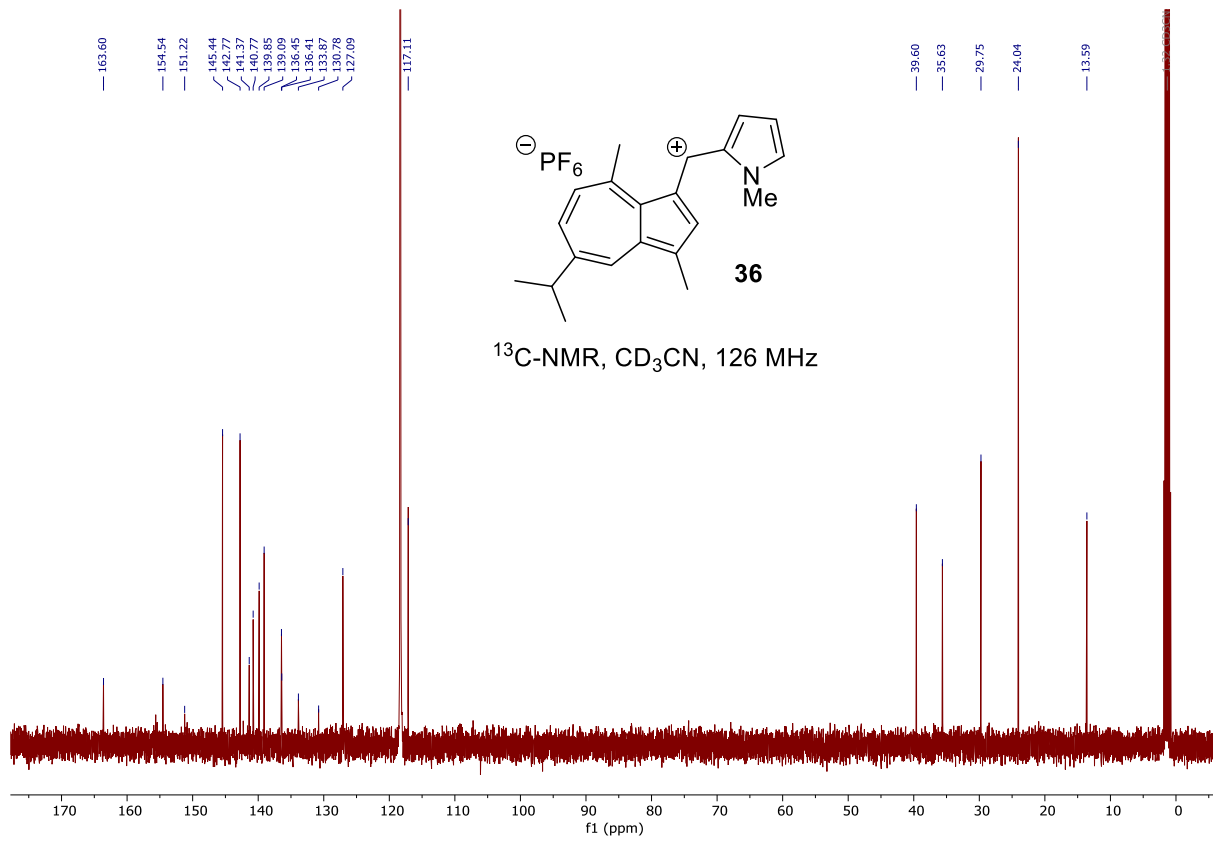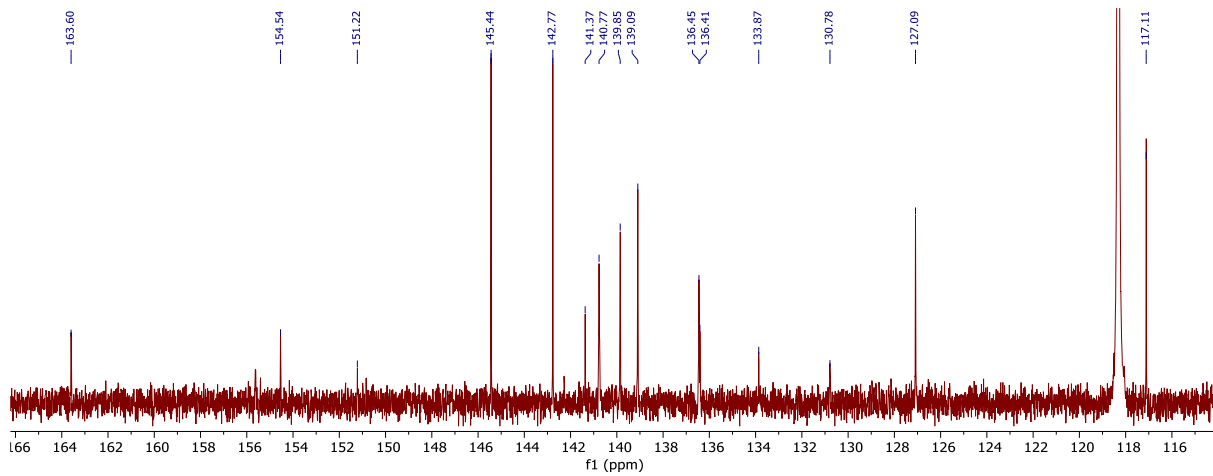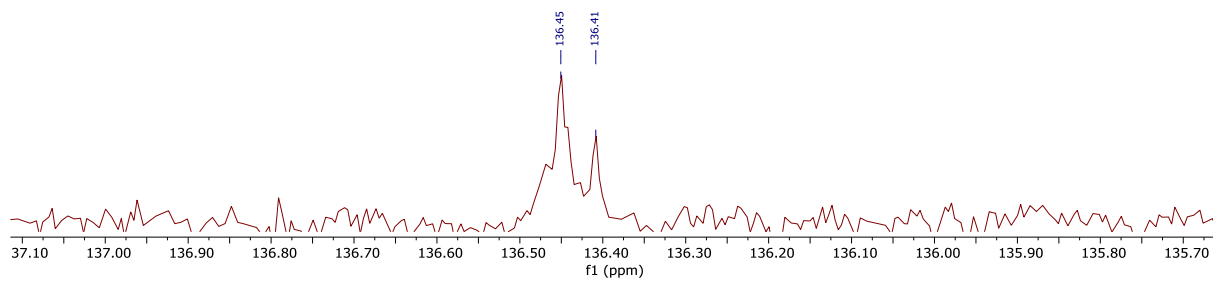

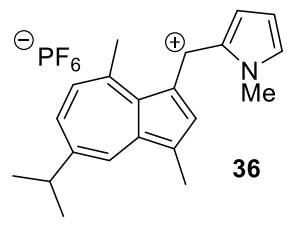

COSY, CD<sub>3</sub>CN

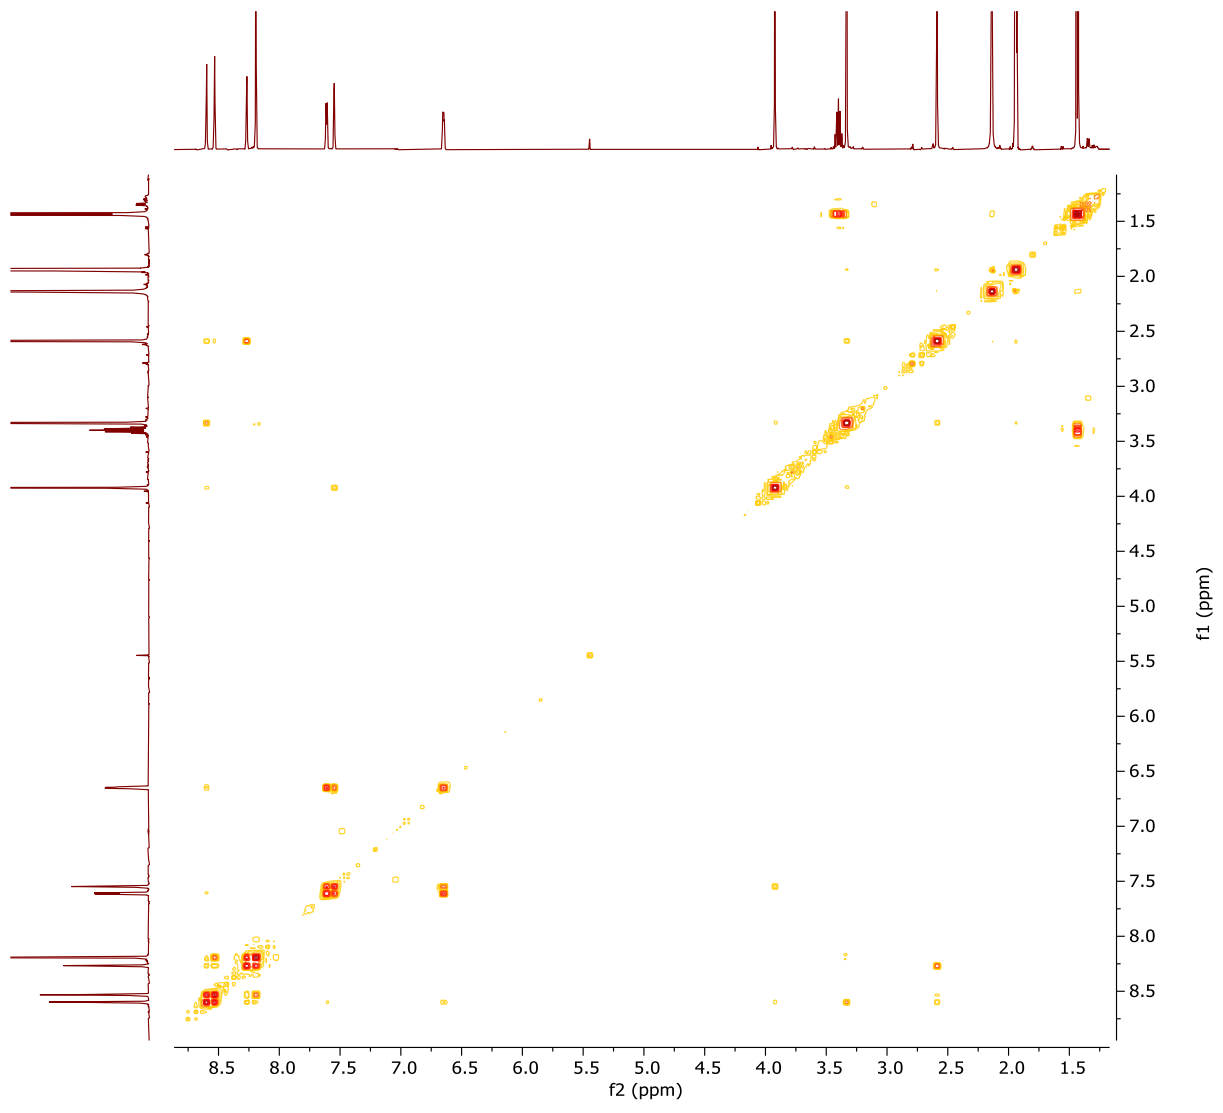



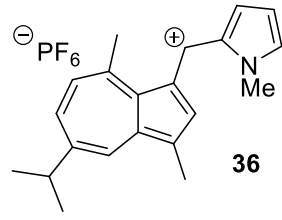

NOESY, CD<sub>3</sub>CN

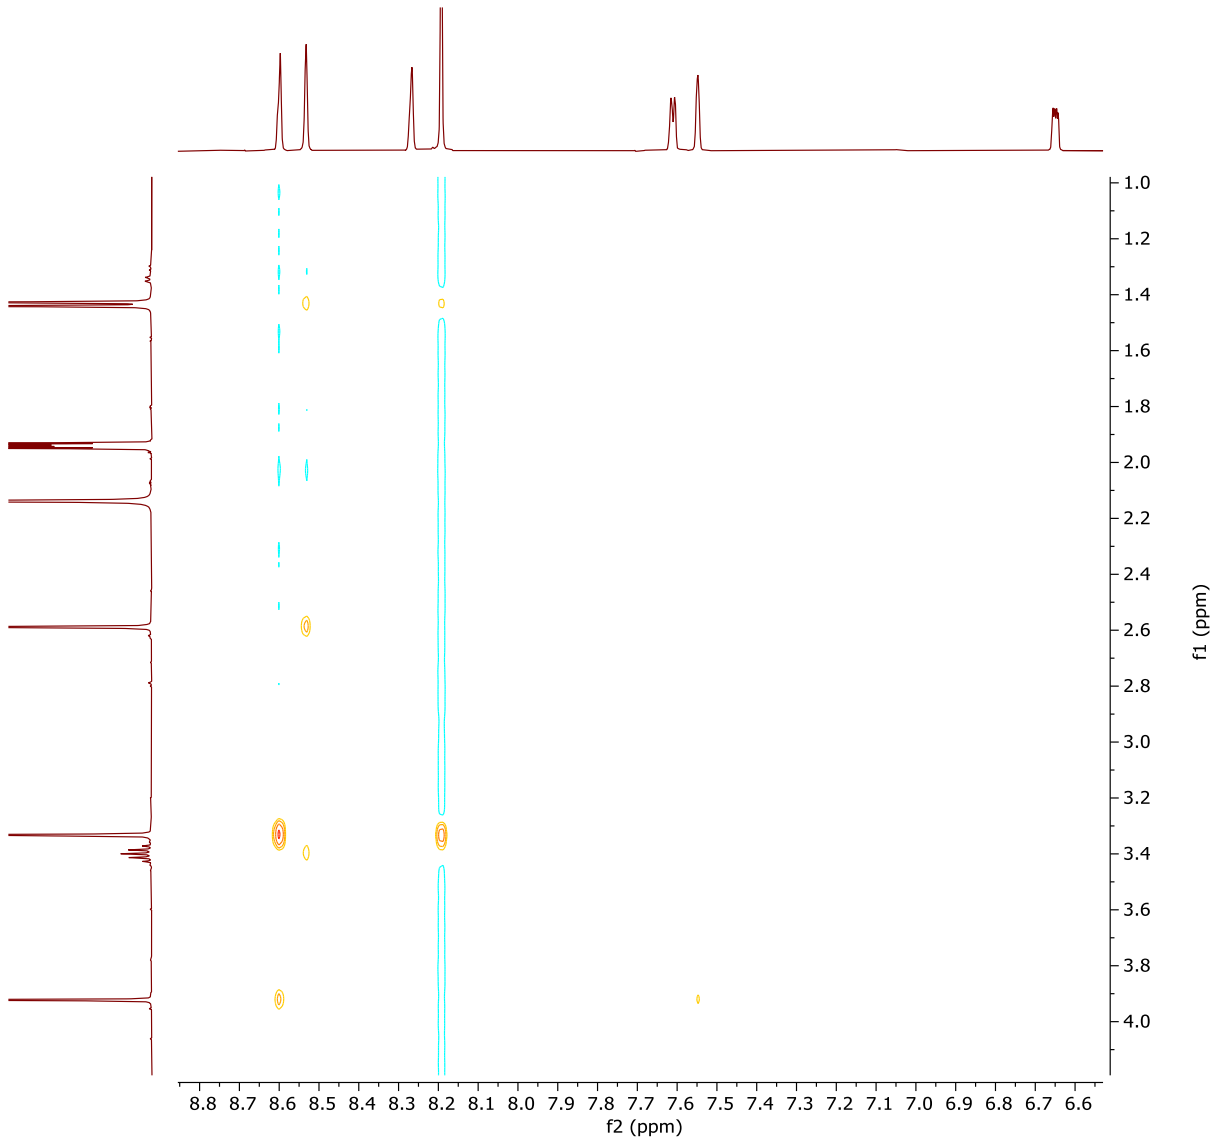

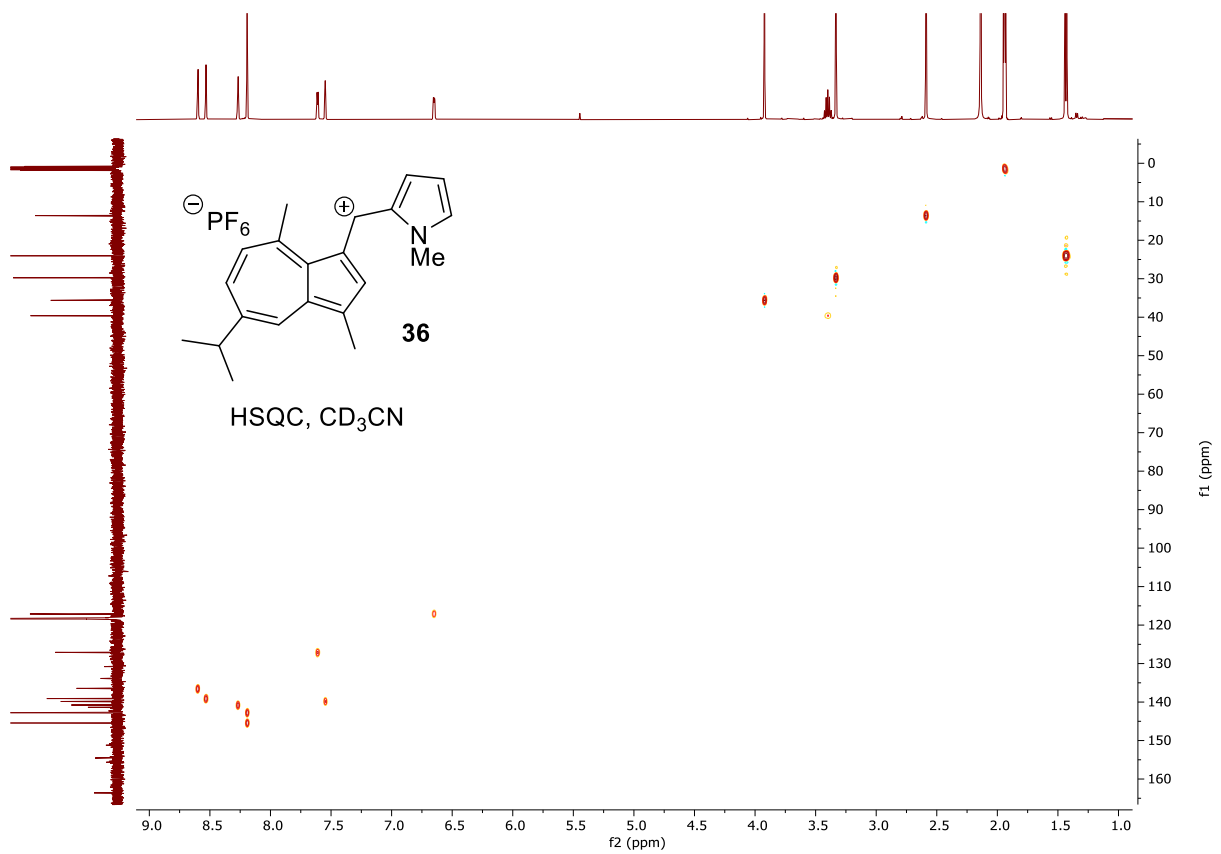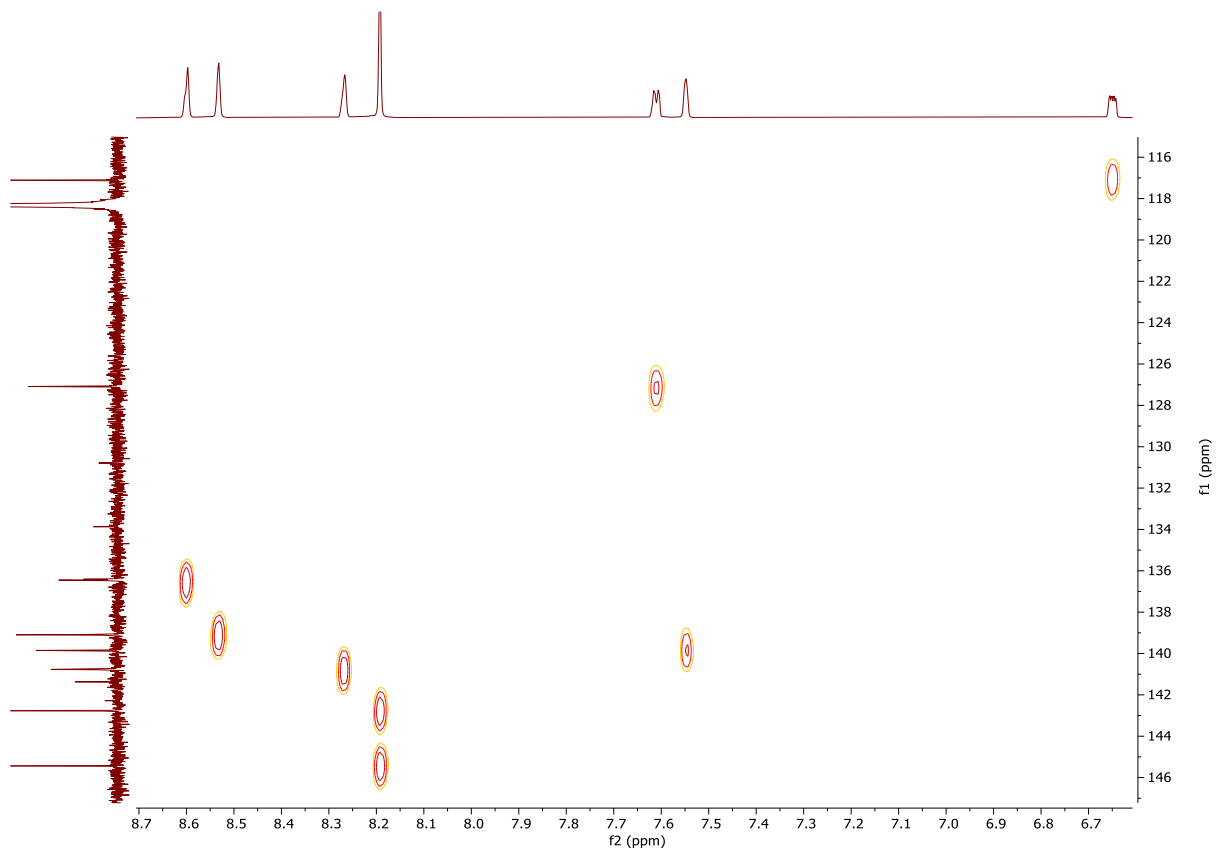

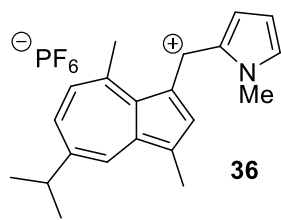

HMBC, CD<sub>3</sub>CN

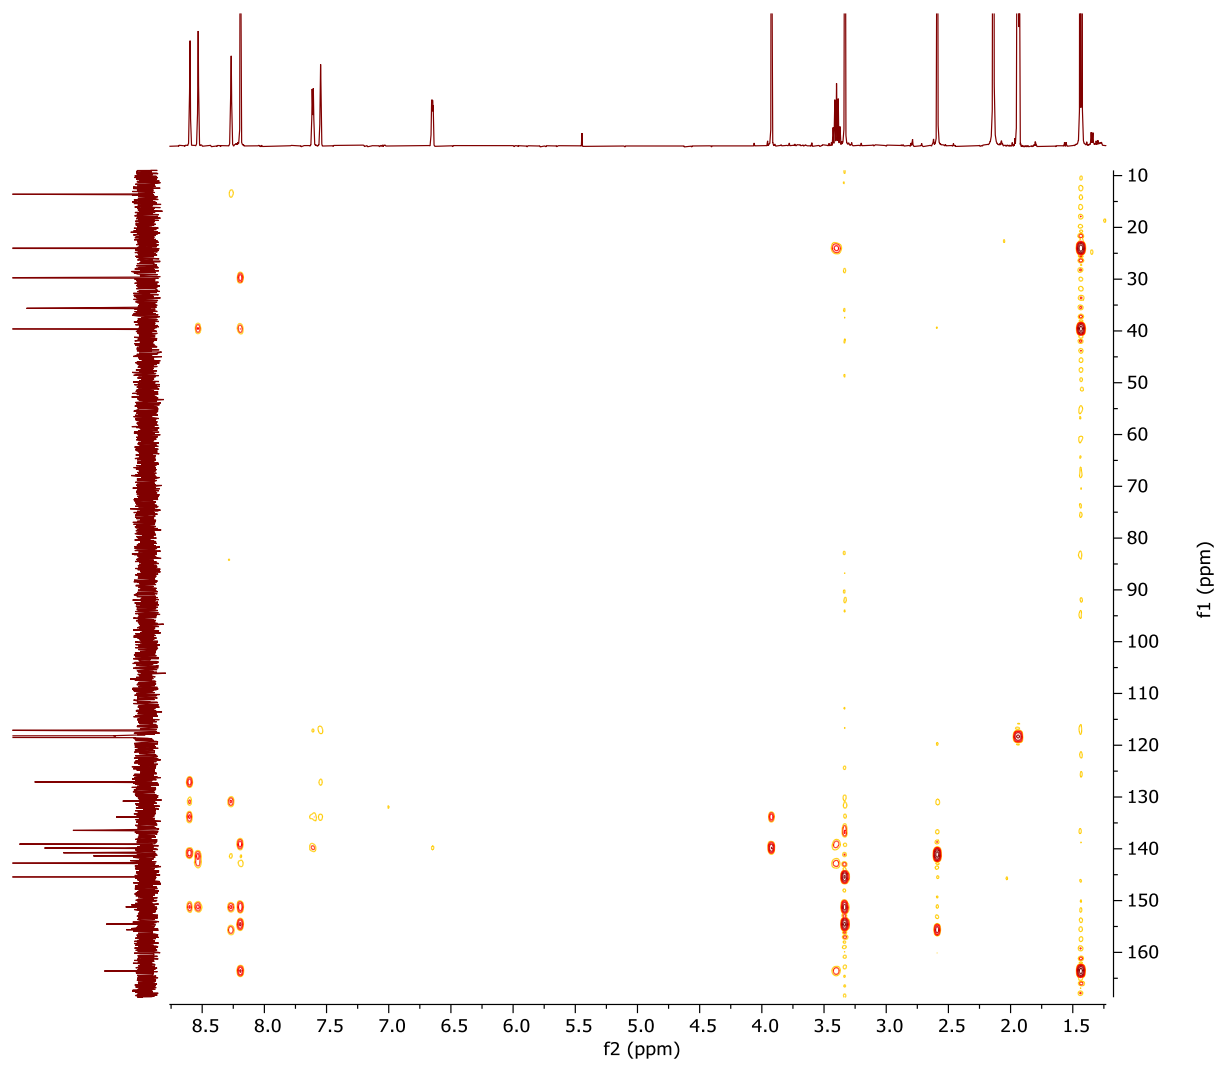

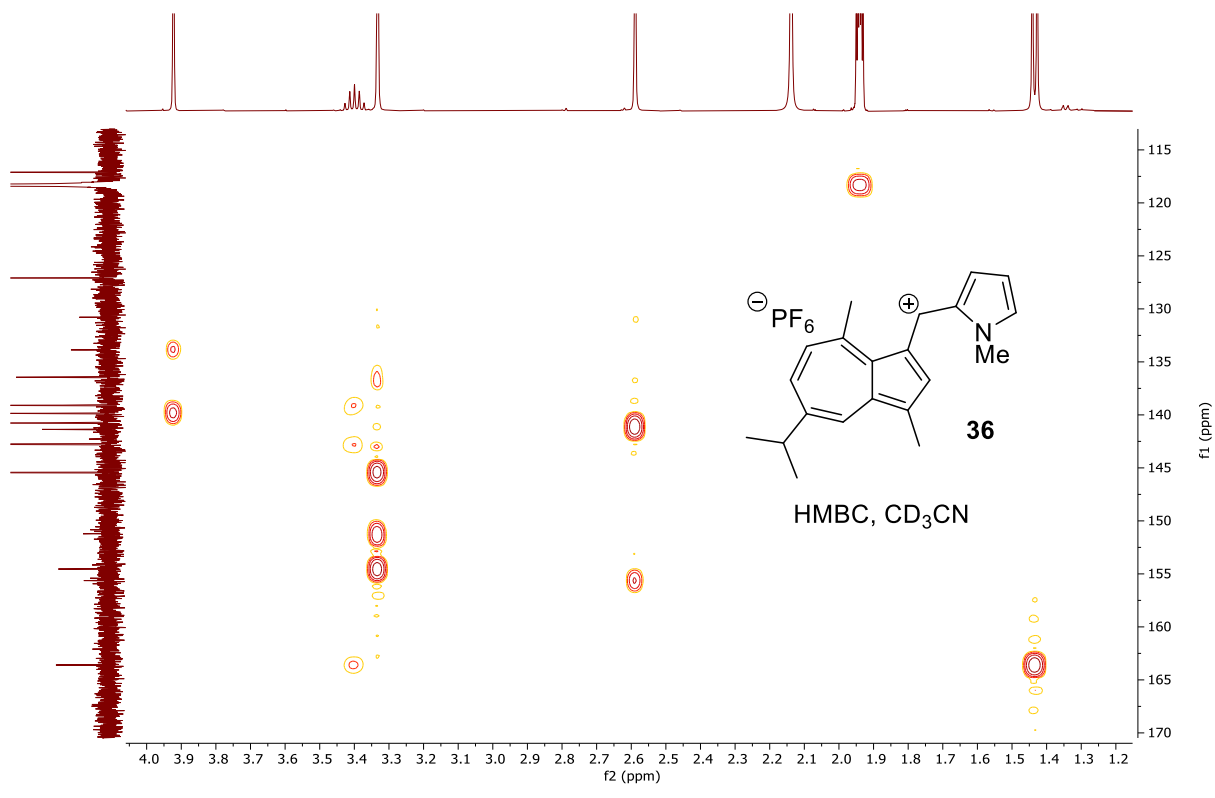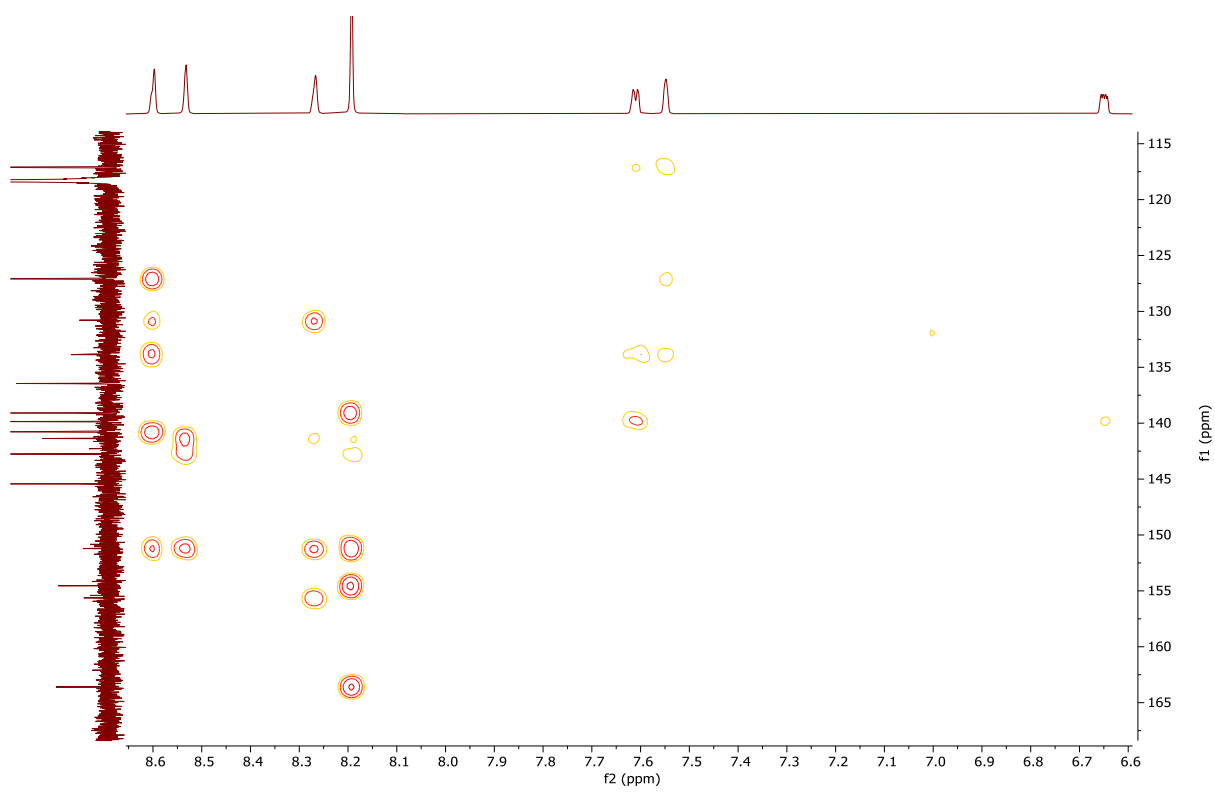

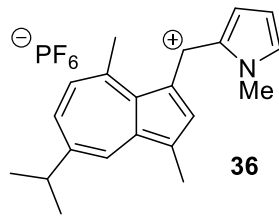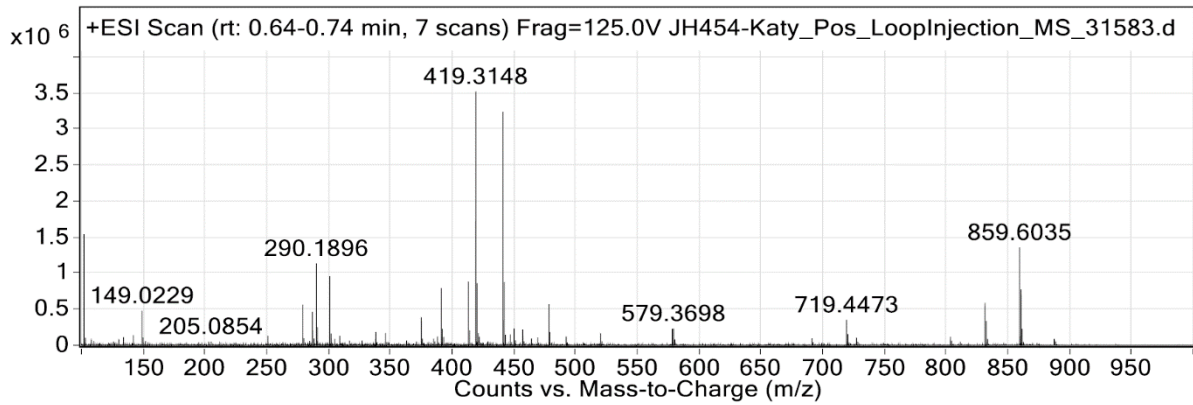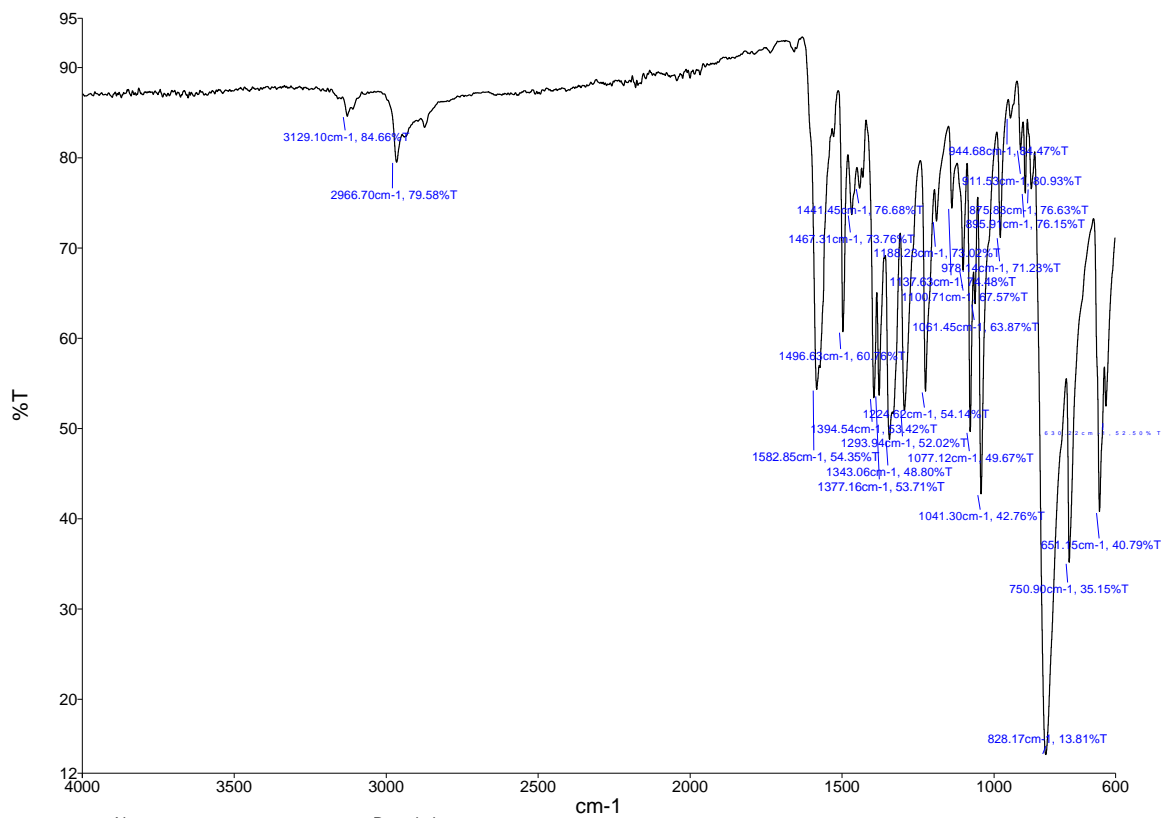

Name: iruser1 8586  
 Description: Sample 8586 By iruser1 Date Thursday, November 17 2022

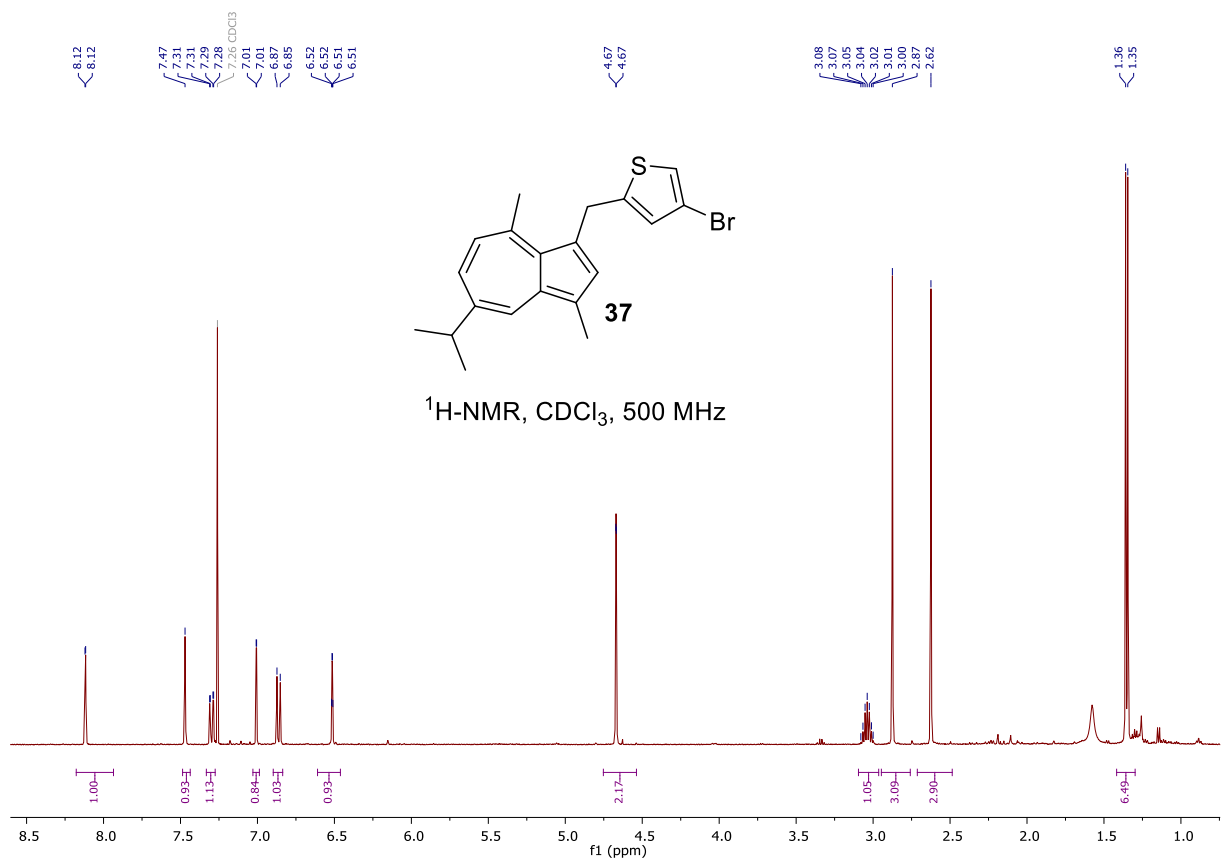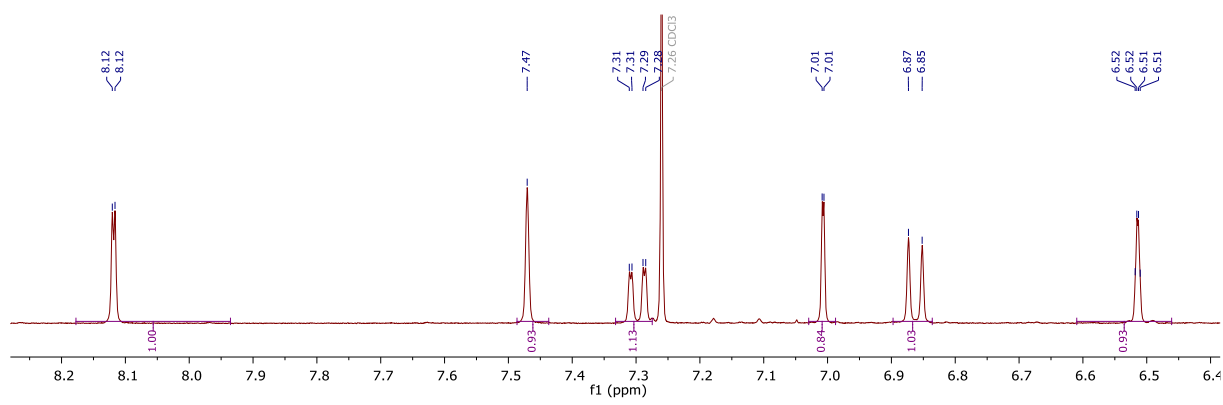

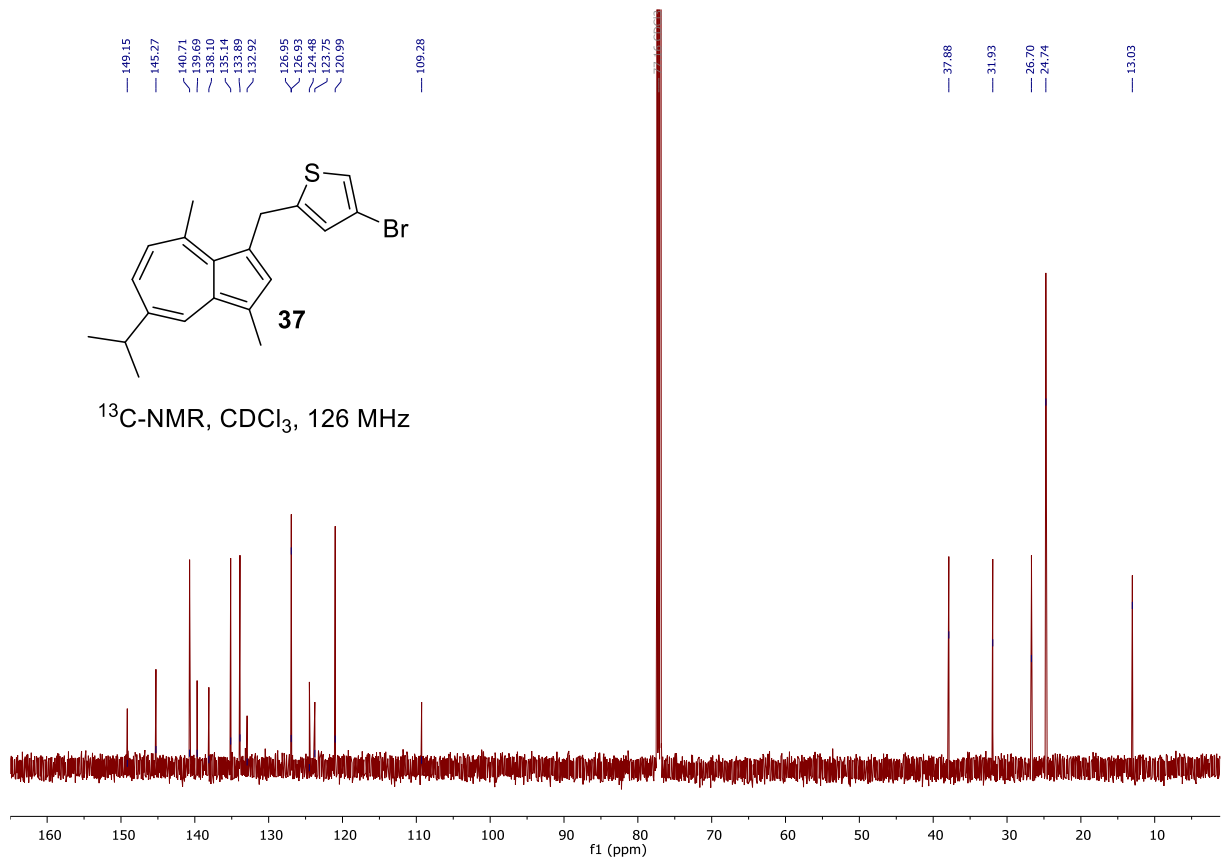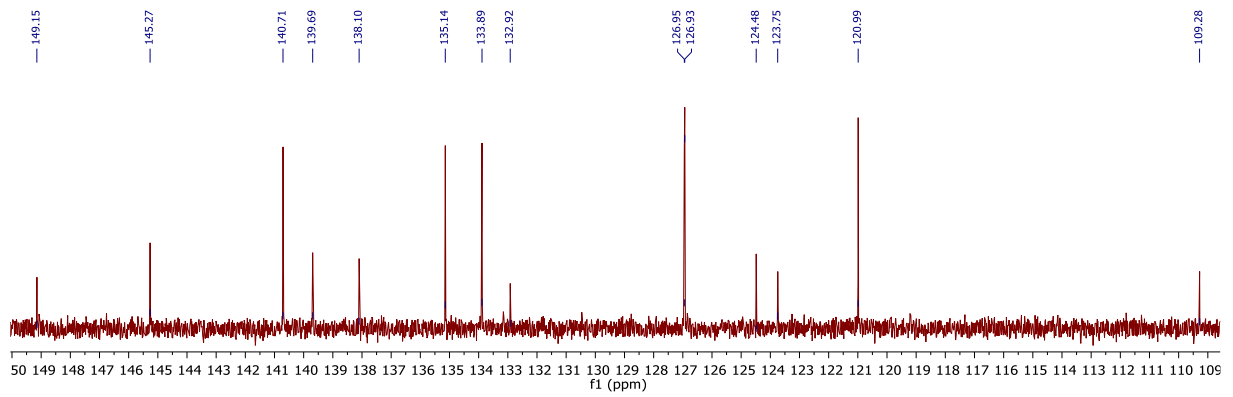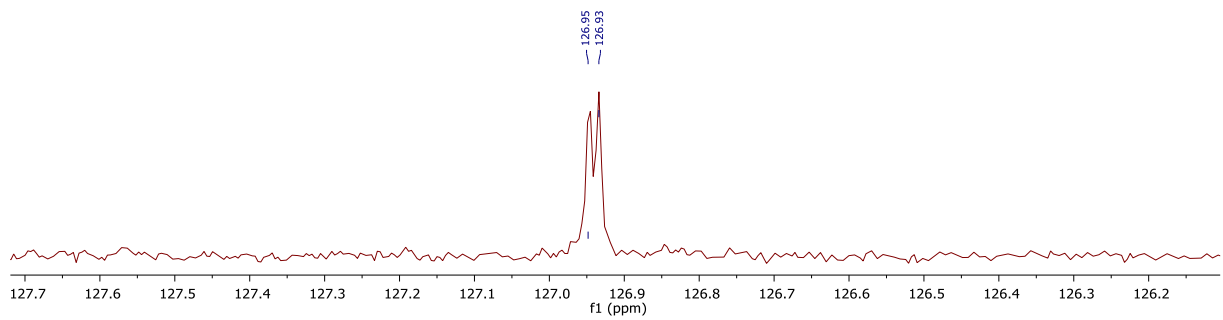

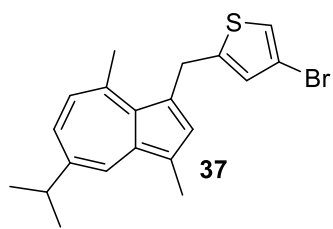

COSY, CDCl<sub>3</sub>

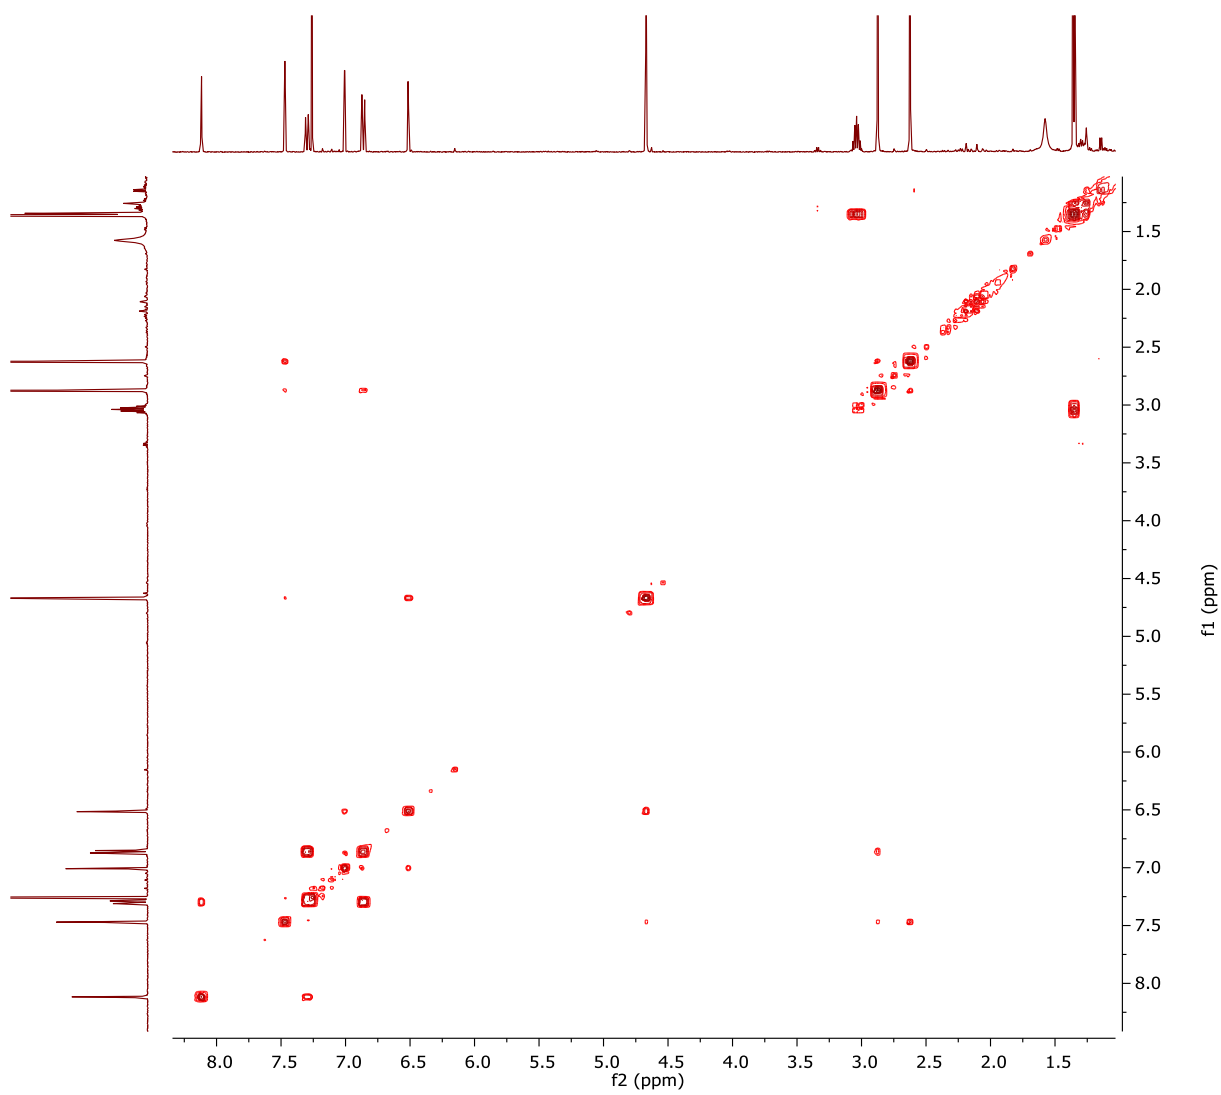



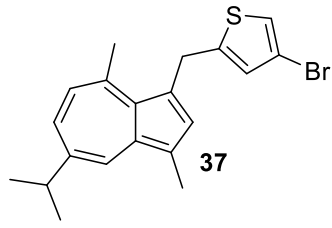

NOESY, CDCl<sub>3</sub>

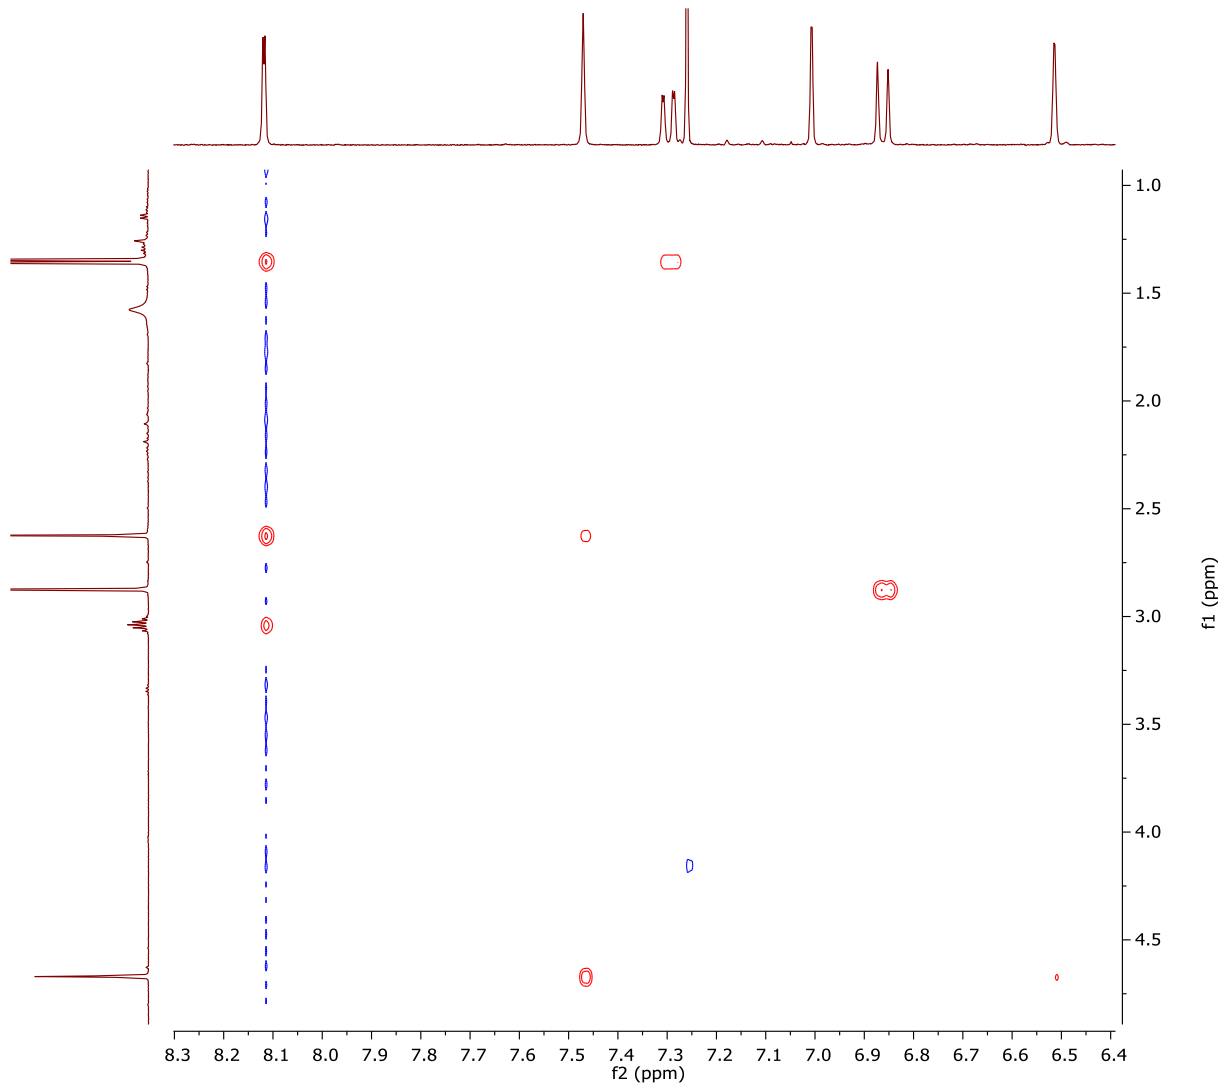

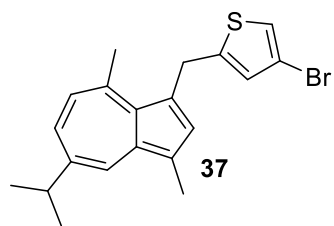

HSQC, CDCl<sub>3</sub>

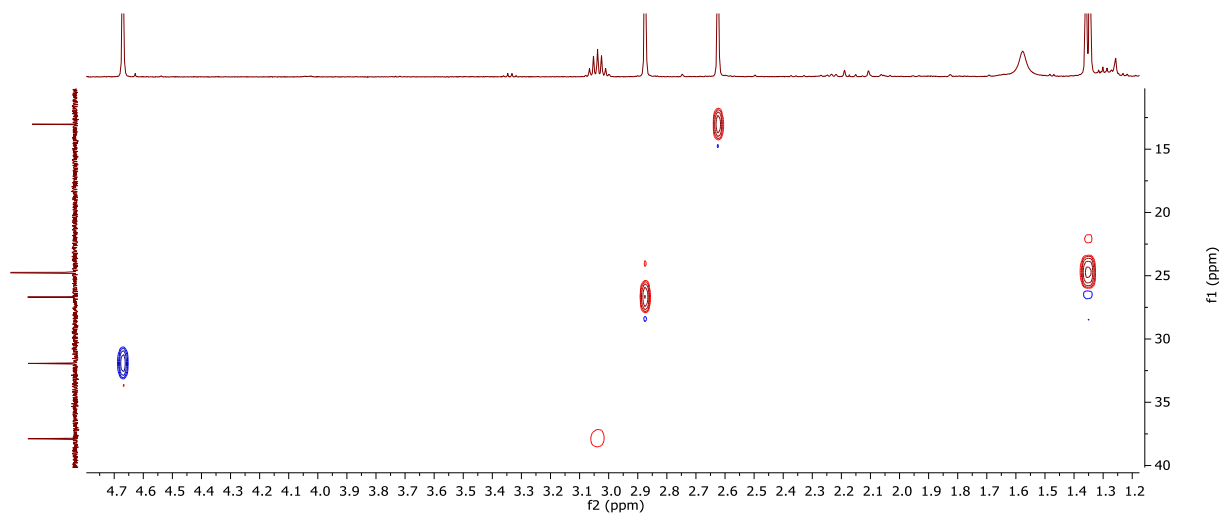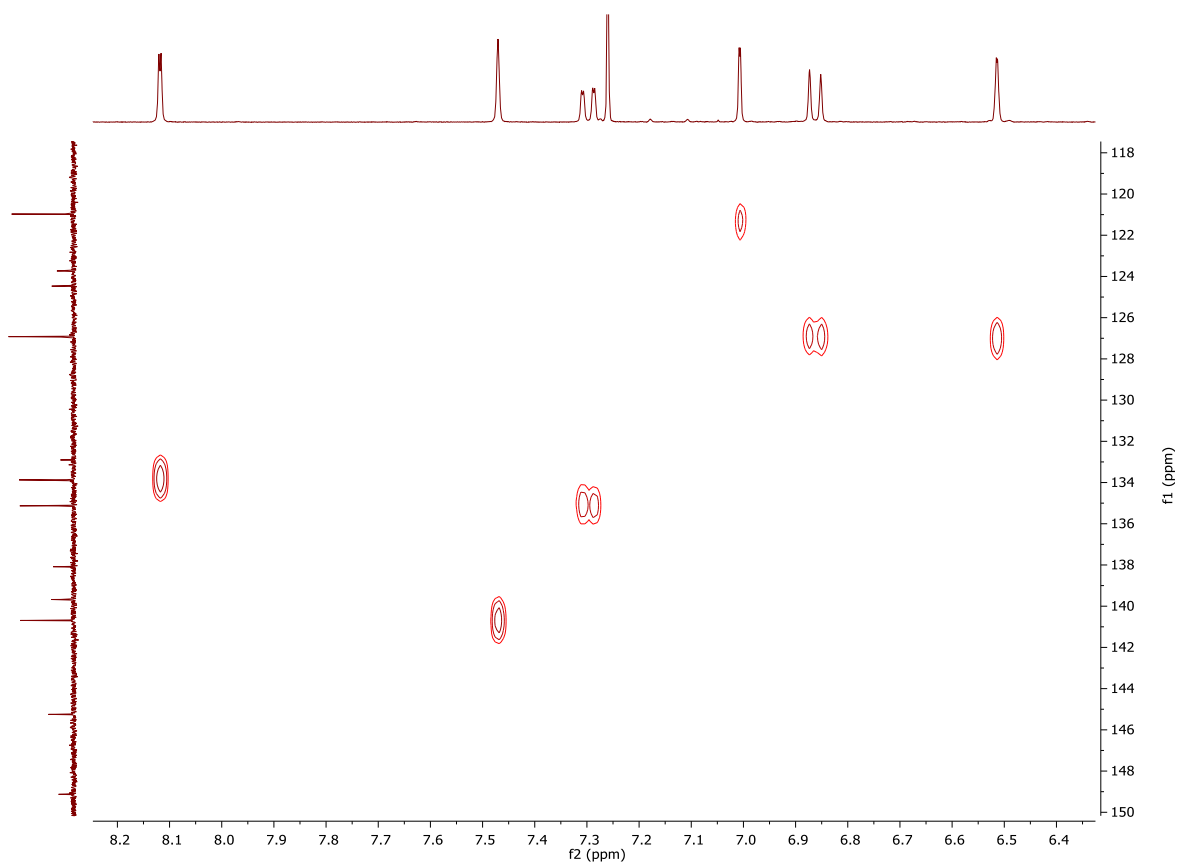

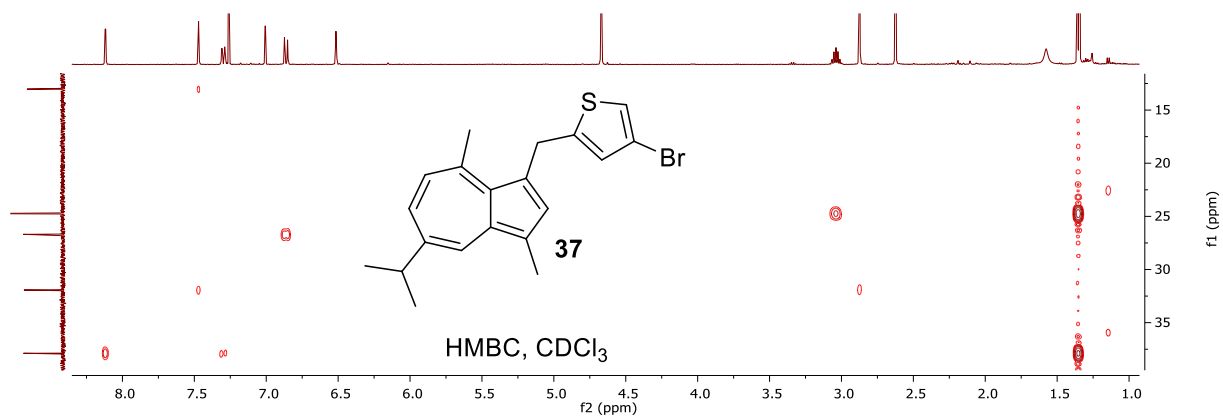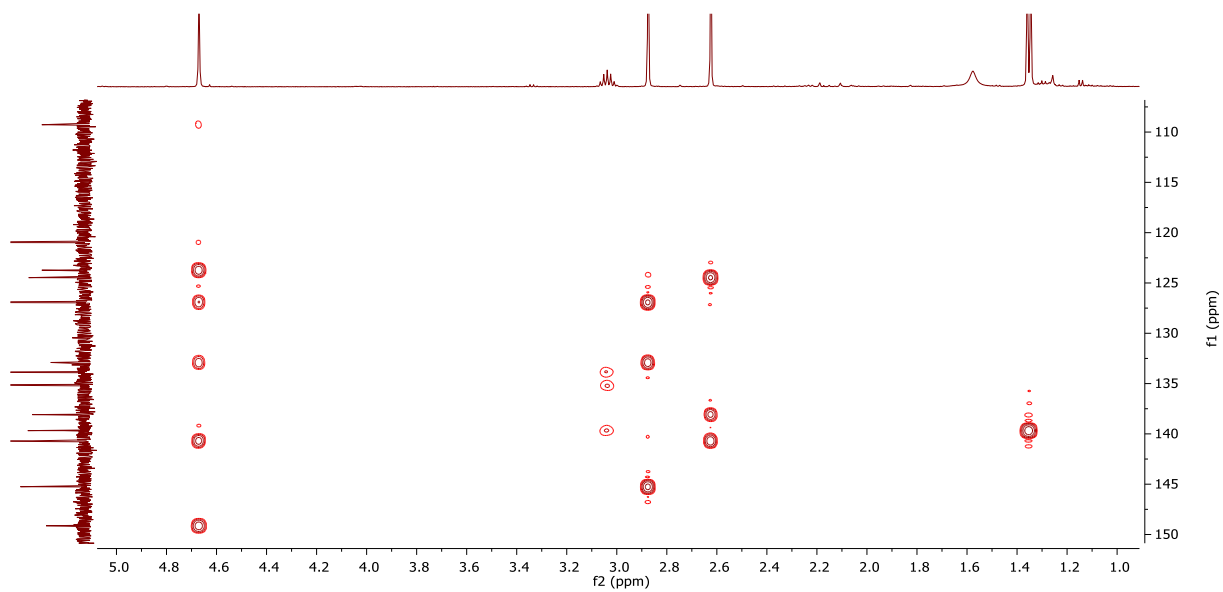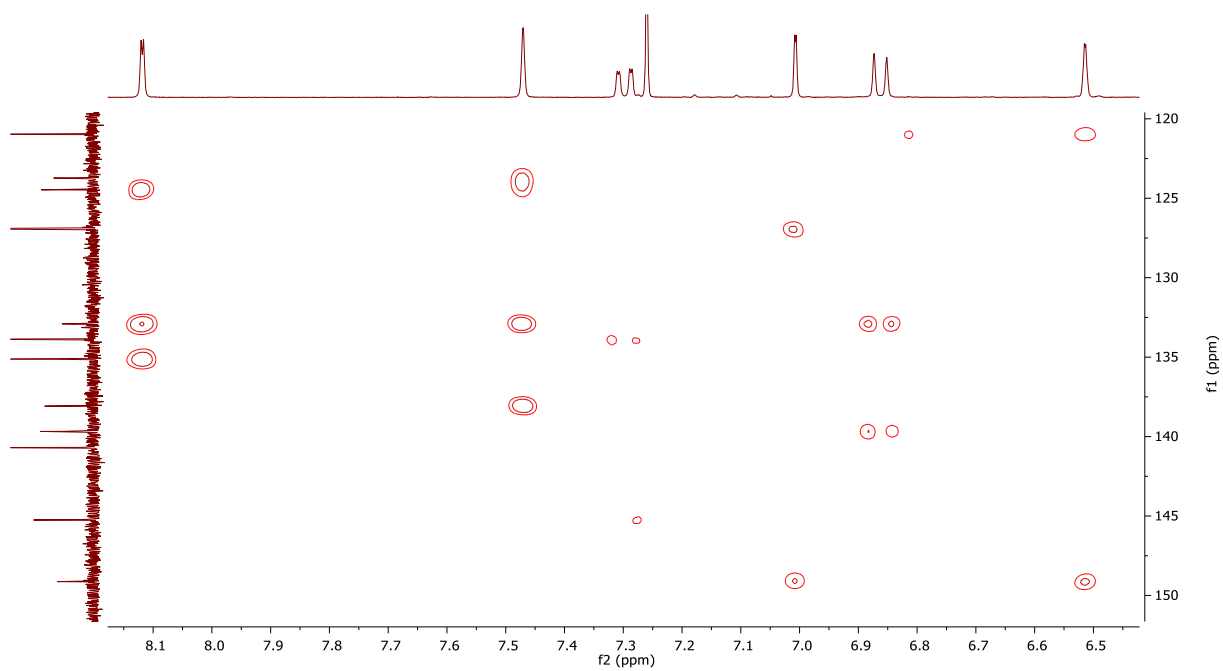

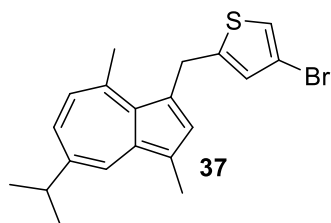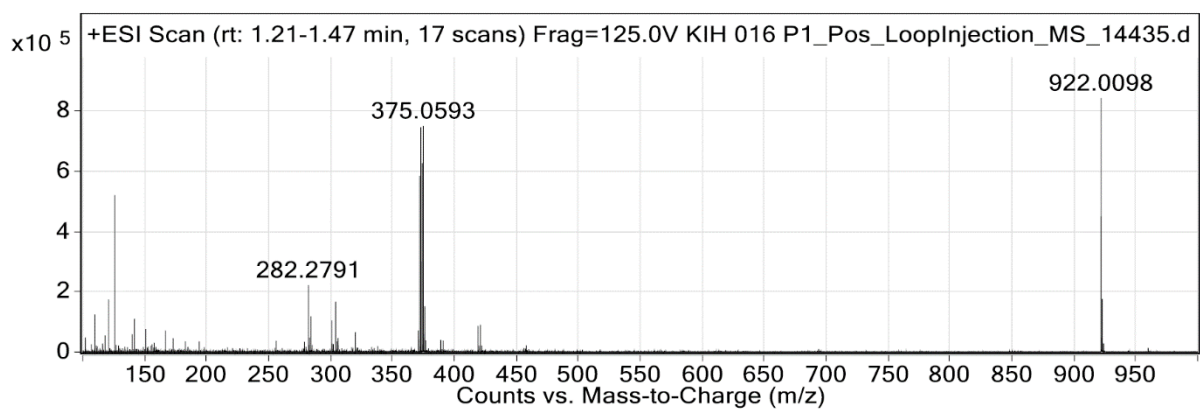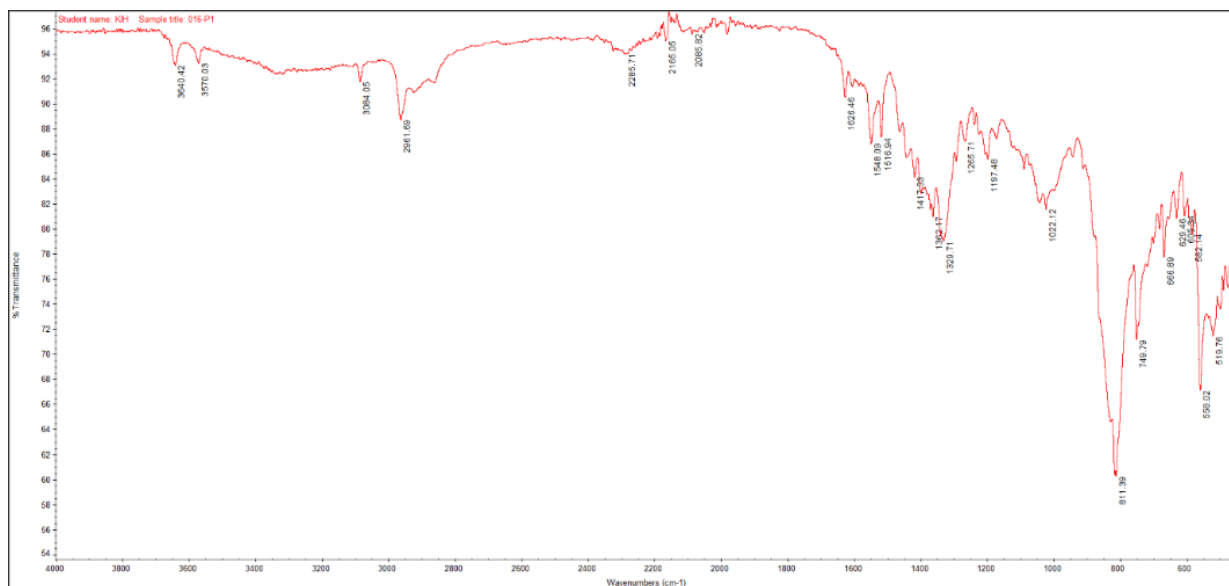

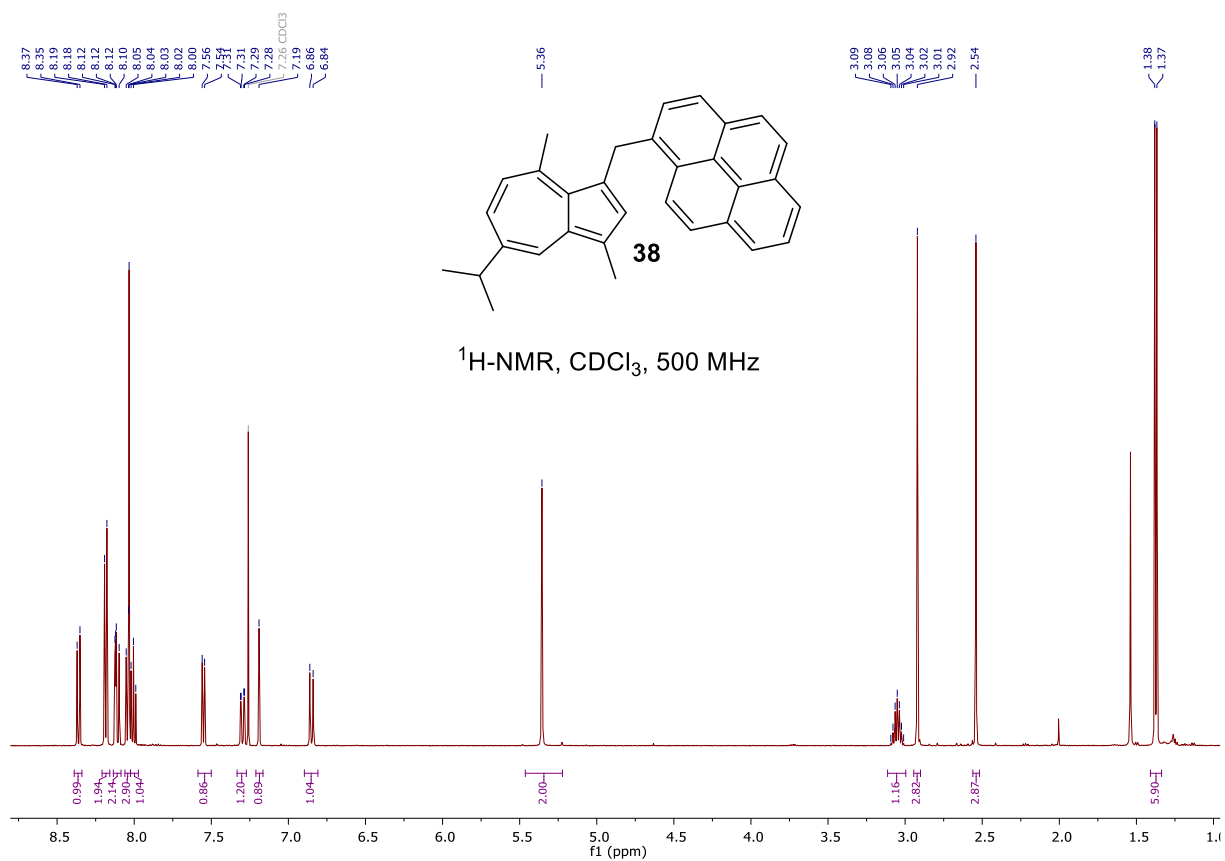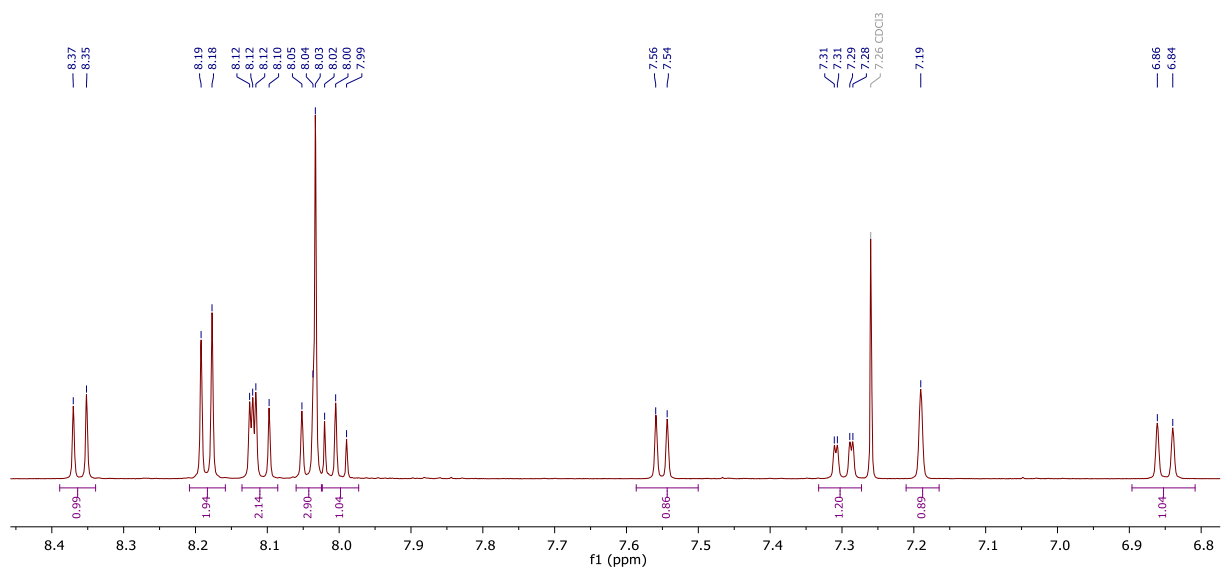

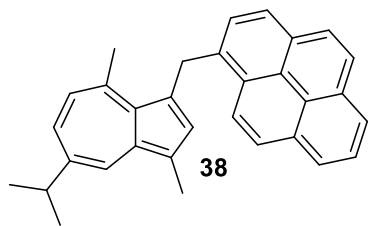

$^{13}\text{C-NMR}$ ,  $\text{CDCl}_3$ , 126 MHz

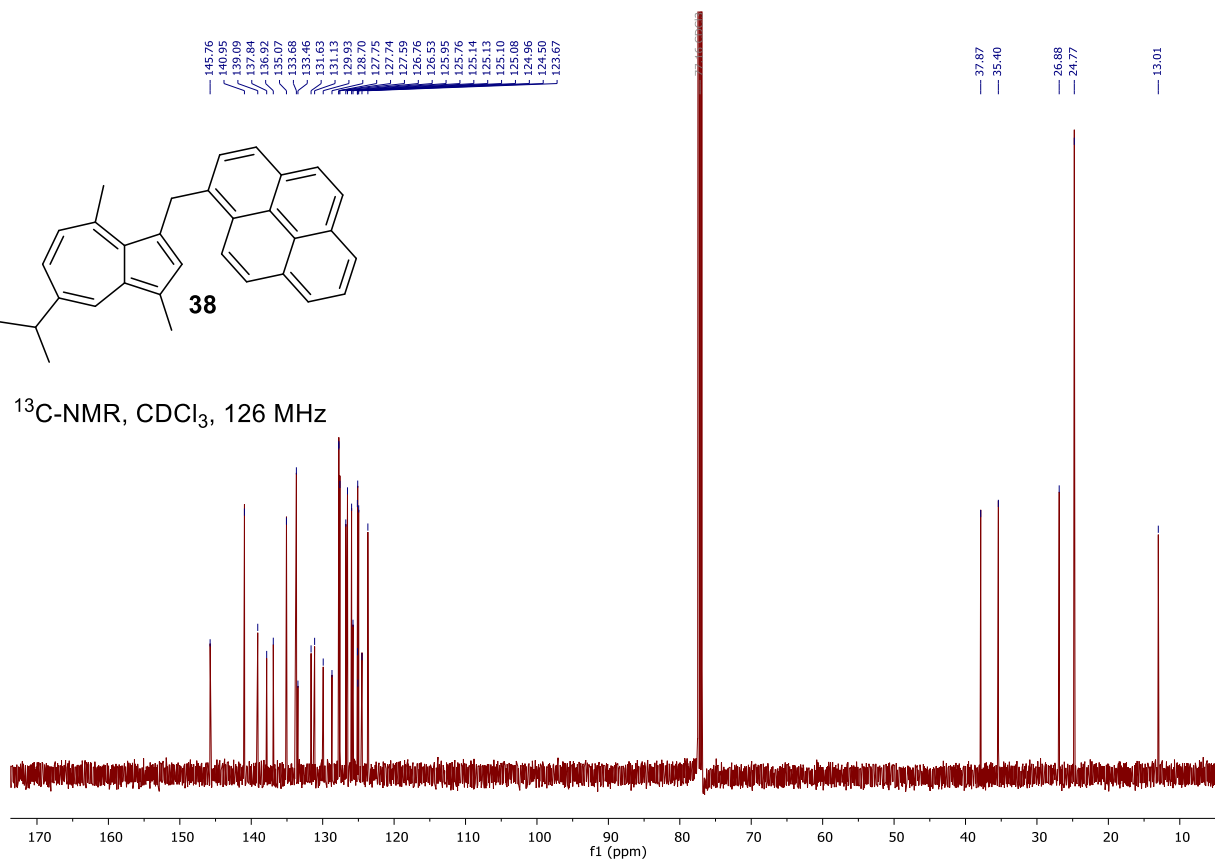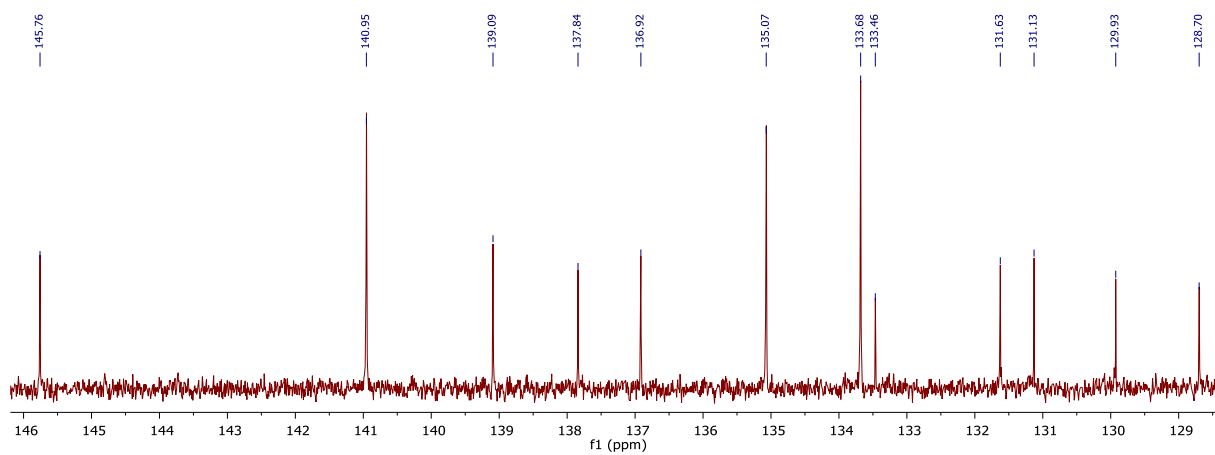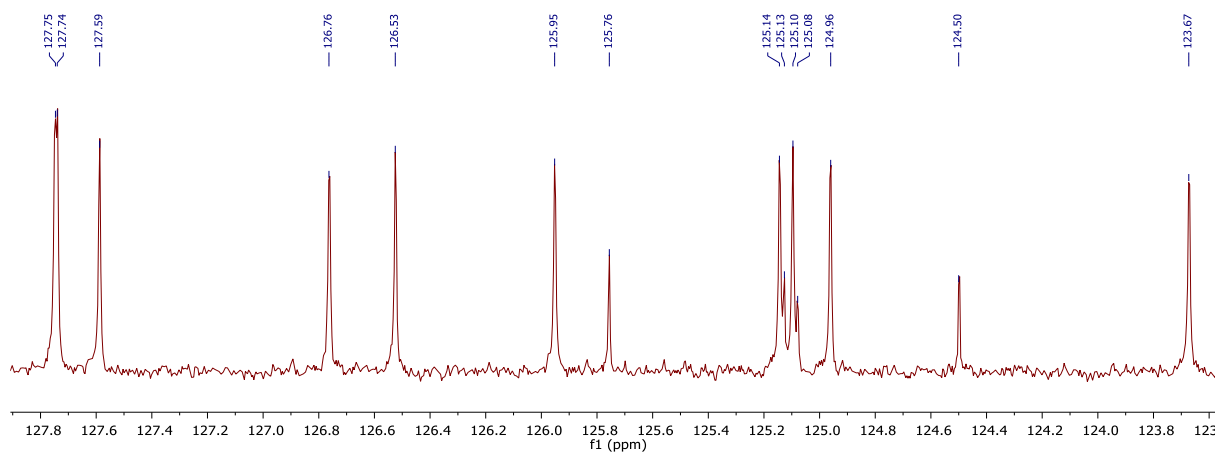

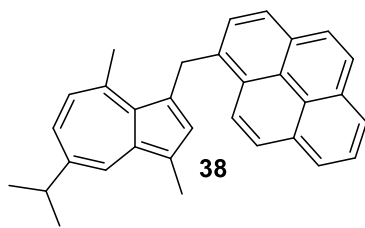

COSY, CDCl<sub>3</sub>

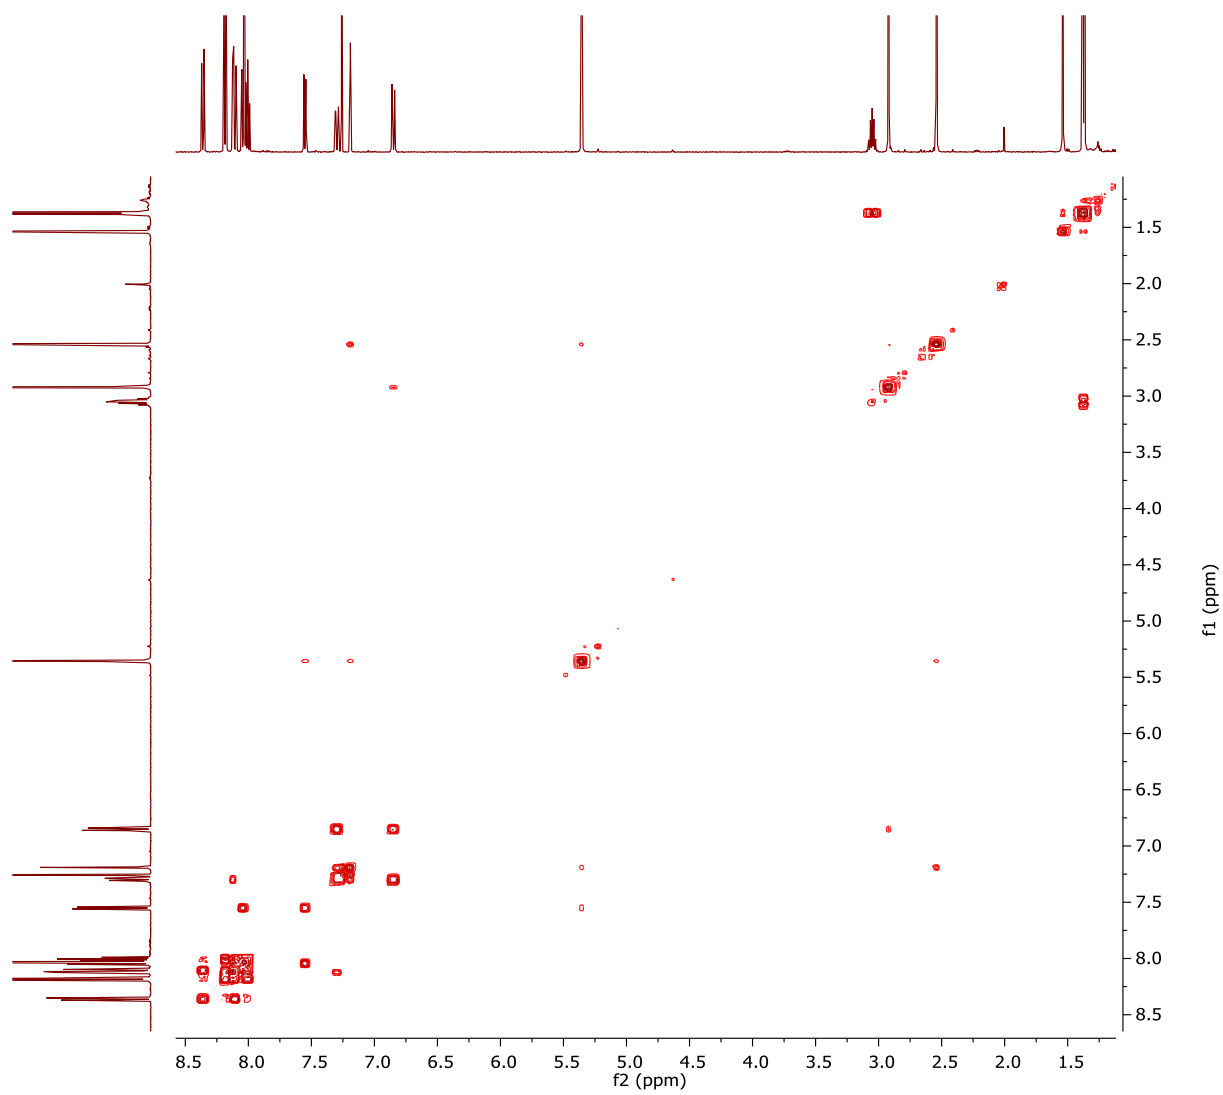

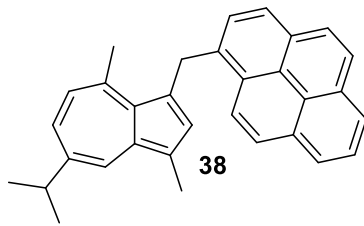

NOESY, CDCl<sub>3</sub>

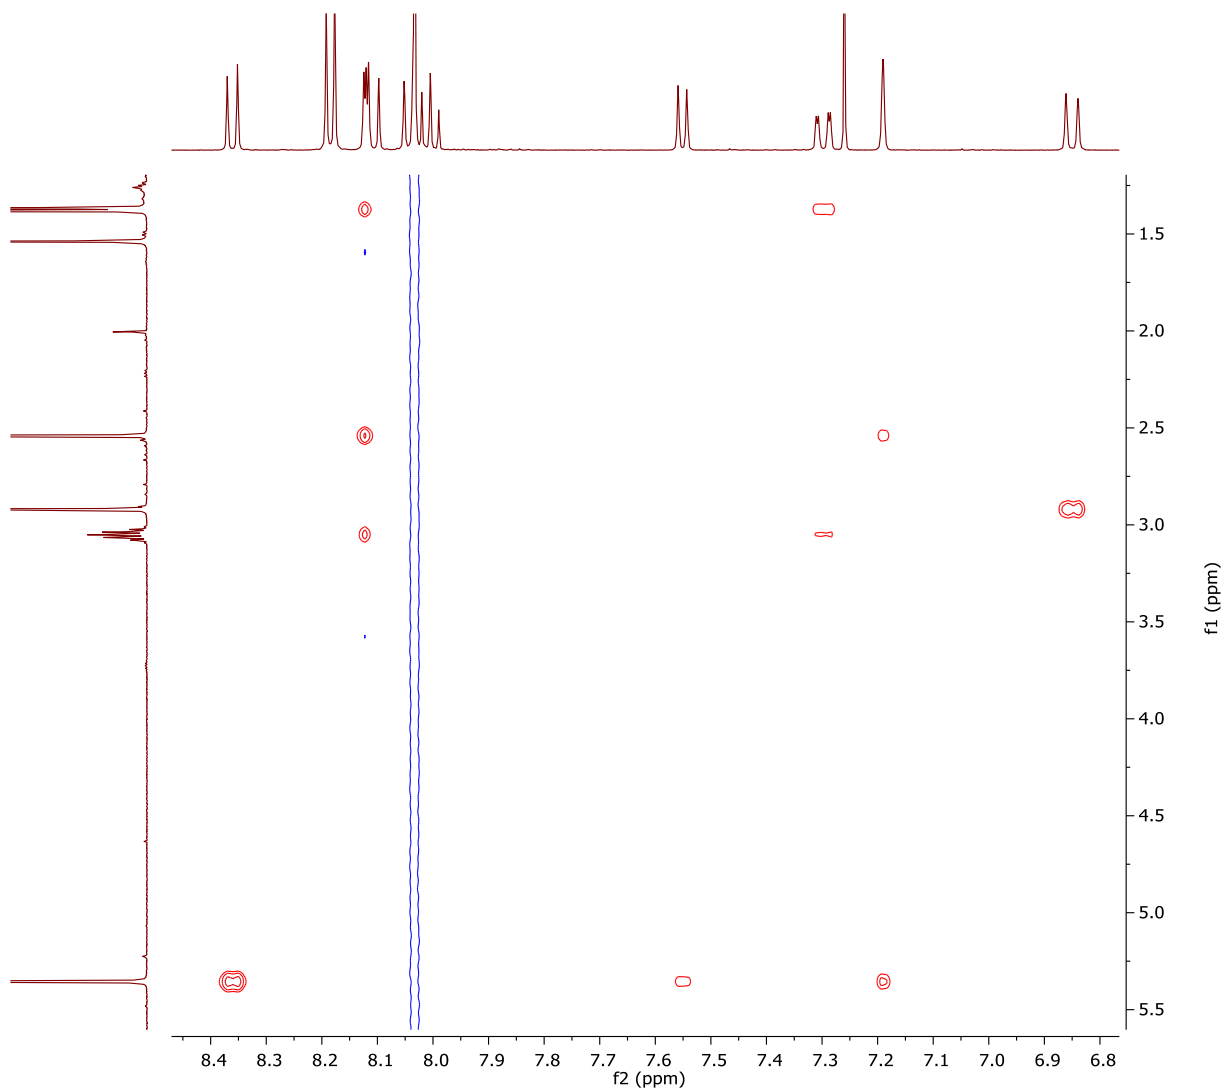



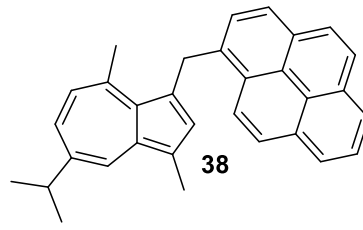

HSQC, CDCl<sub>3</sub>

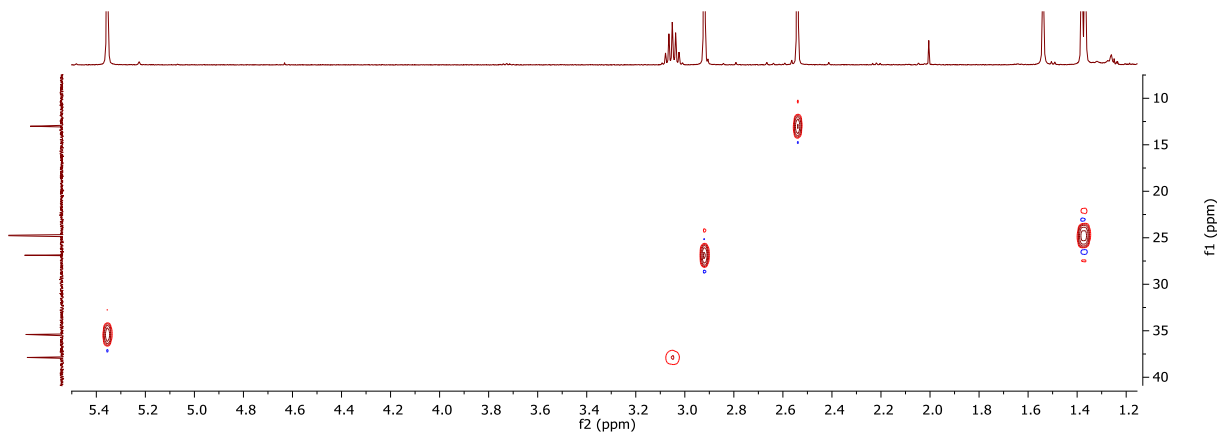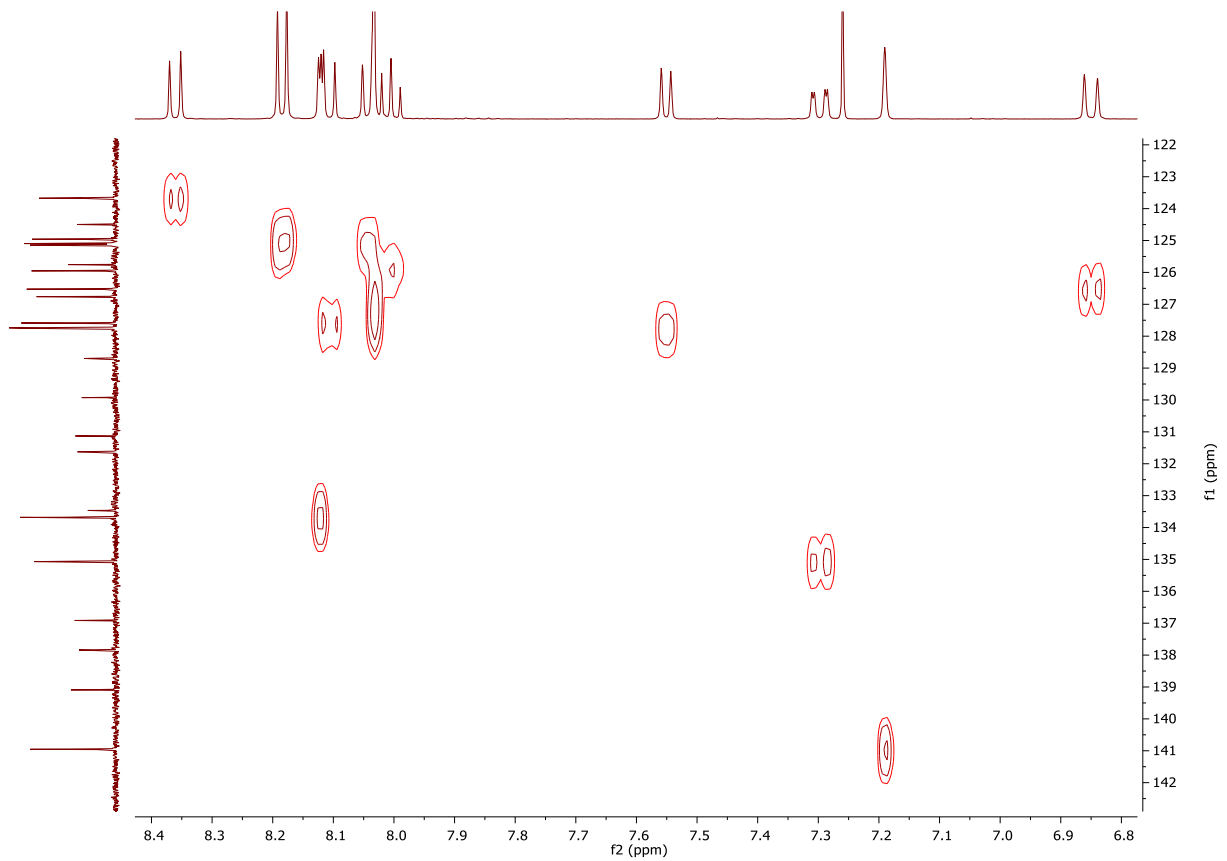

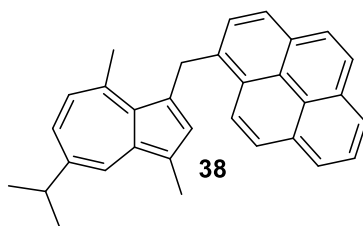

HMBC, CDCl<sub>3</sub>

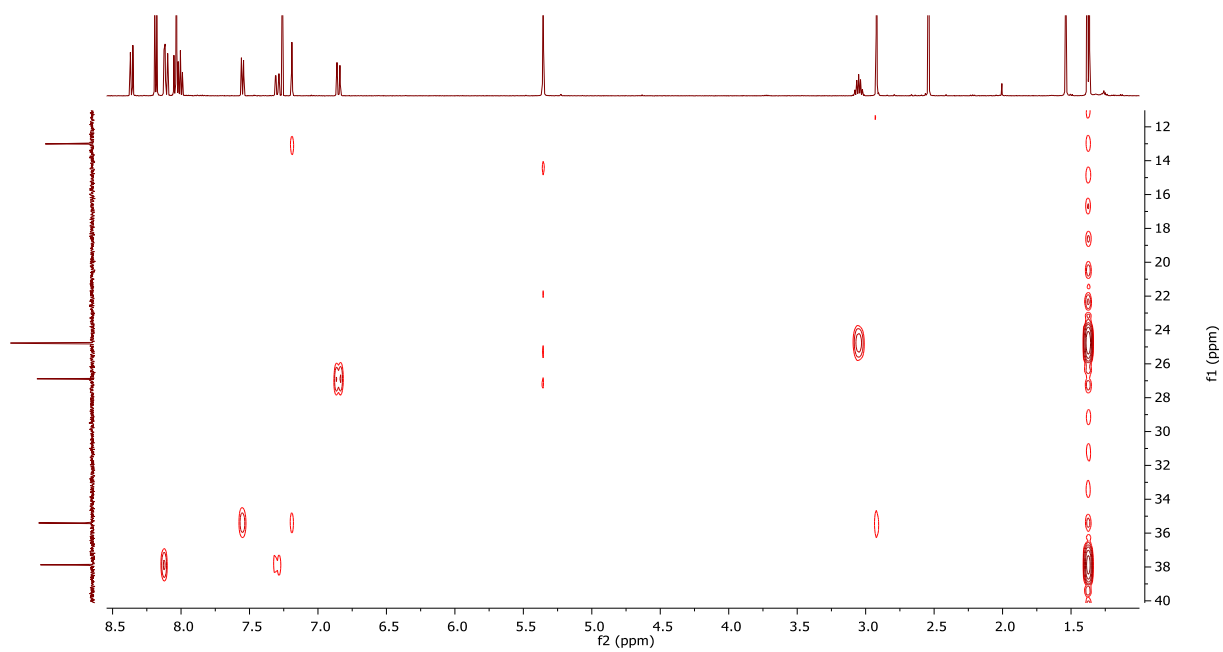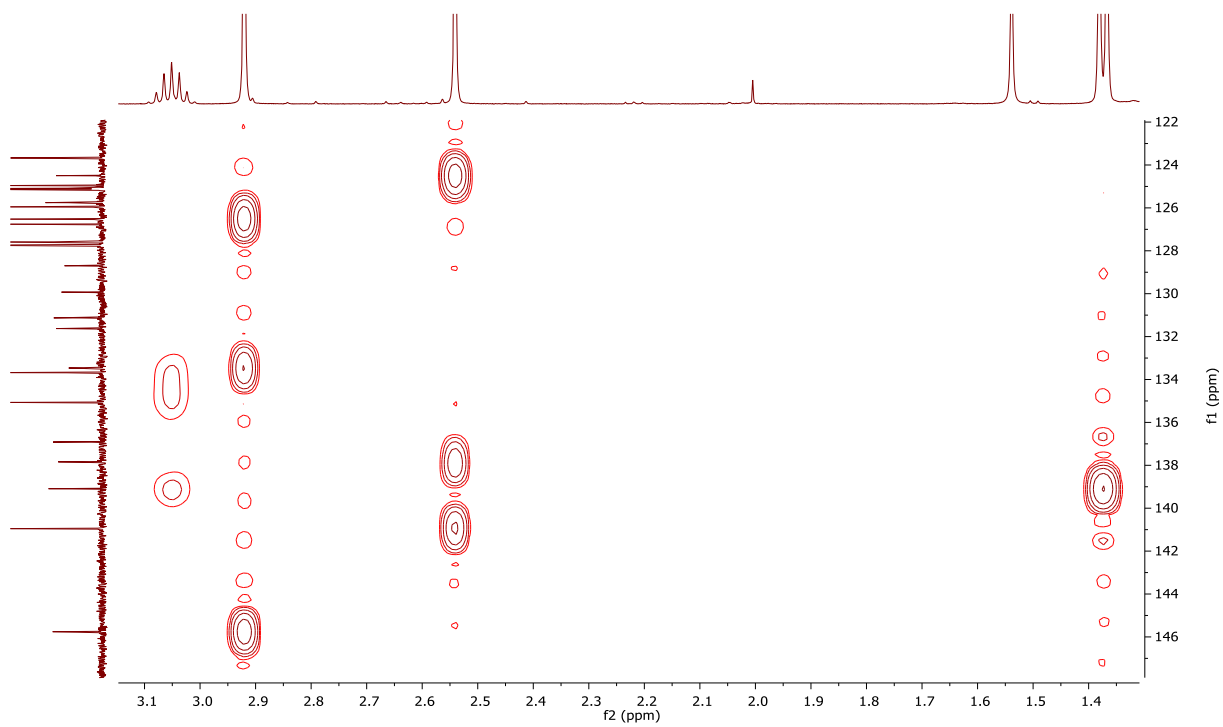

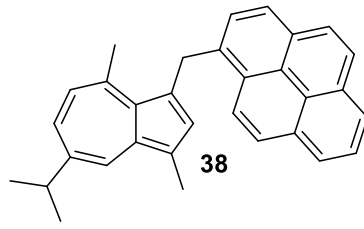

HMBC, CDCl<sub>3</sub>

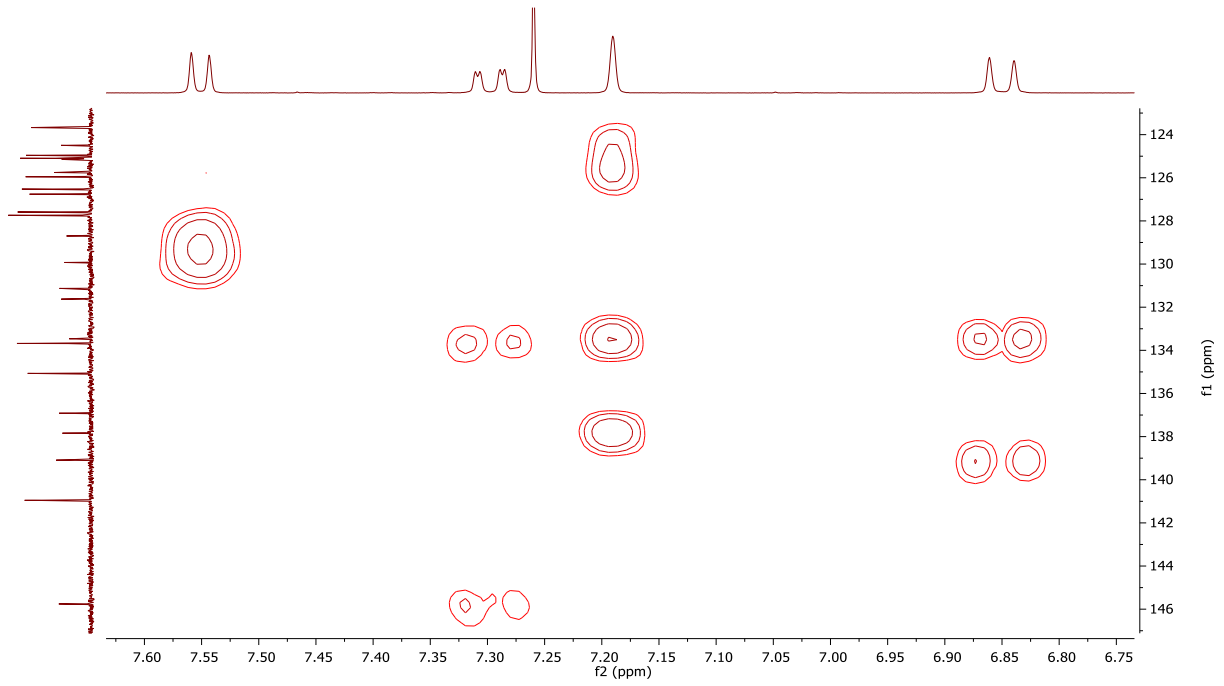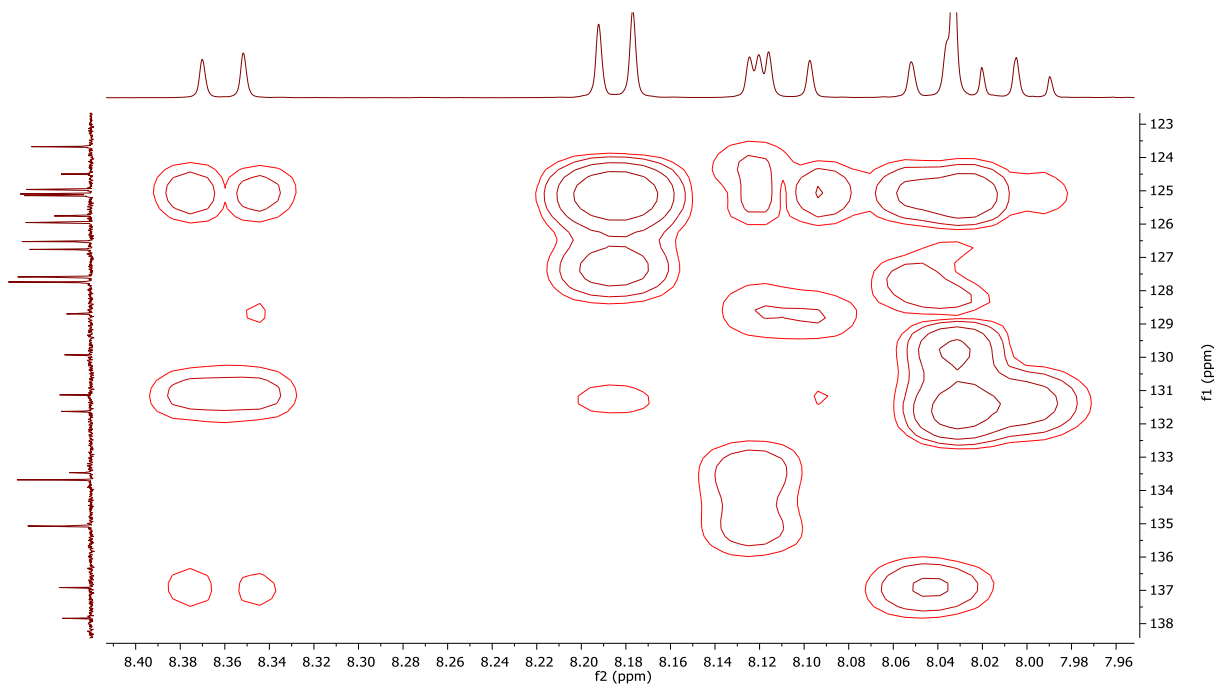

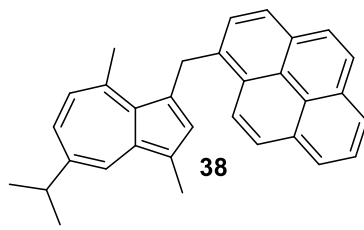

HMBC, CDCl<sub>3</sub>

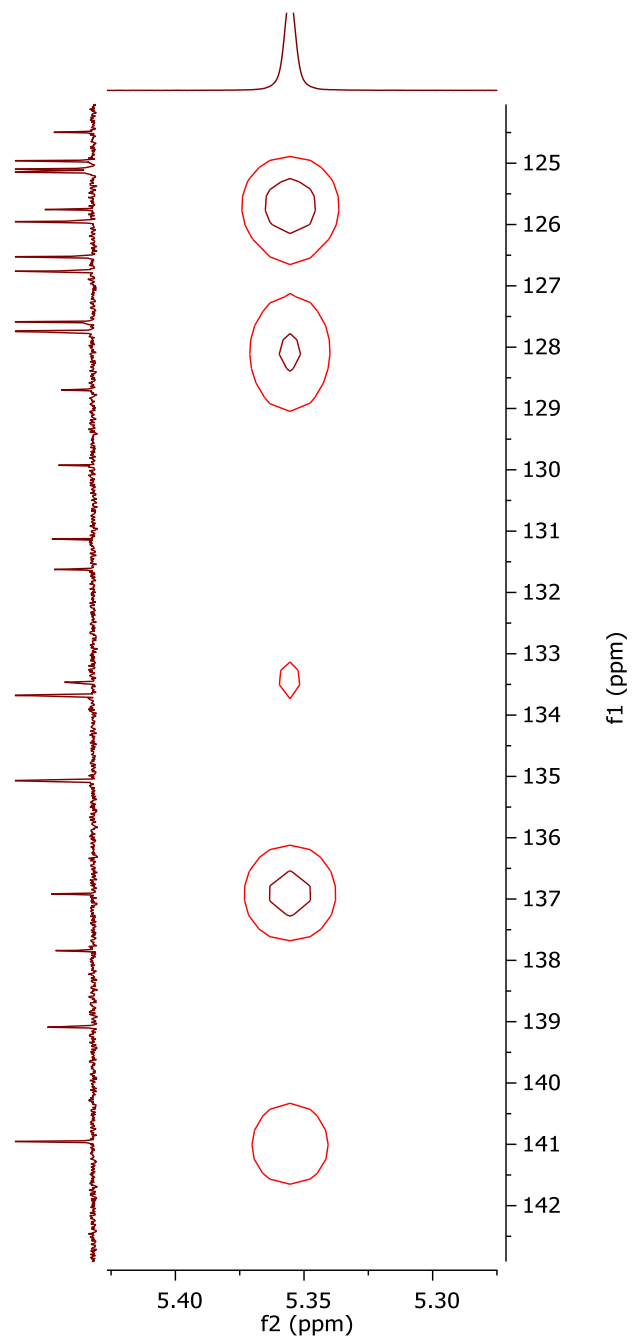

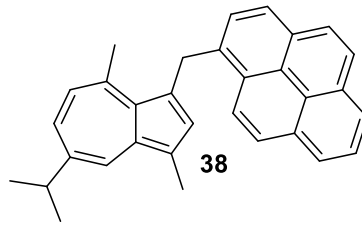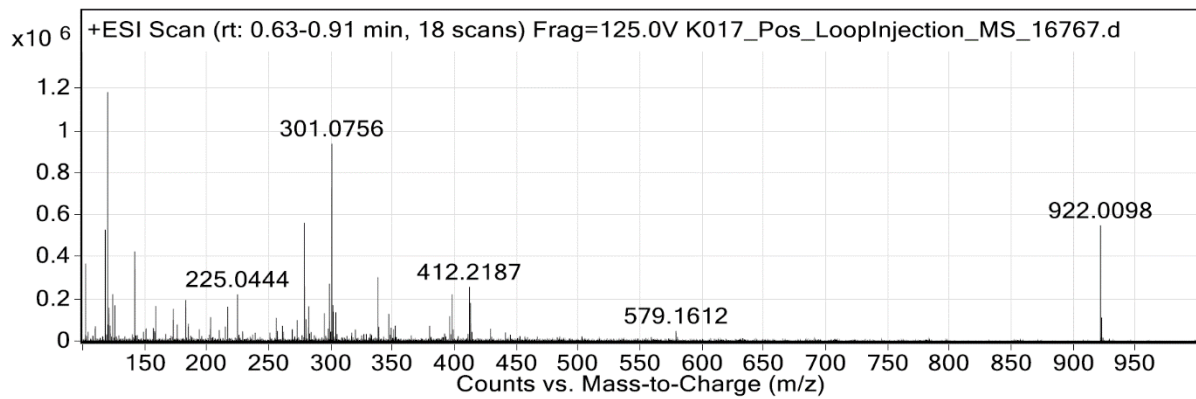

**Figure: Extracted ion chromatogram (EIC) of compound.**

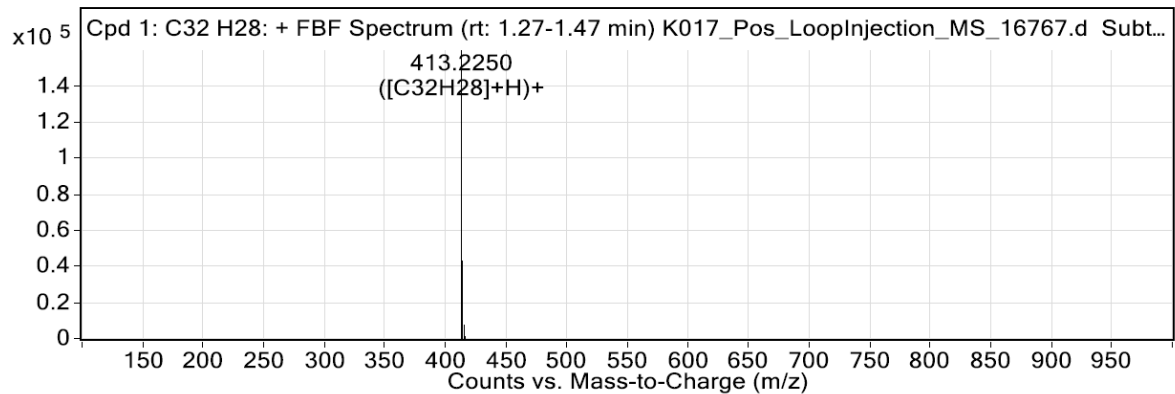

**Figure: Full range view of Compound spectra and potential adducts.**

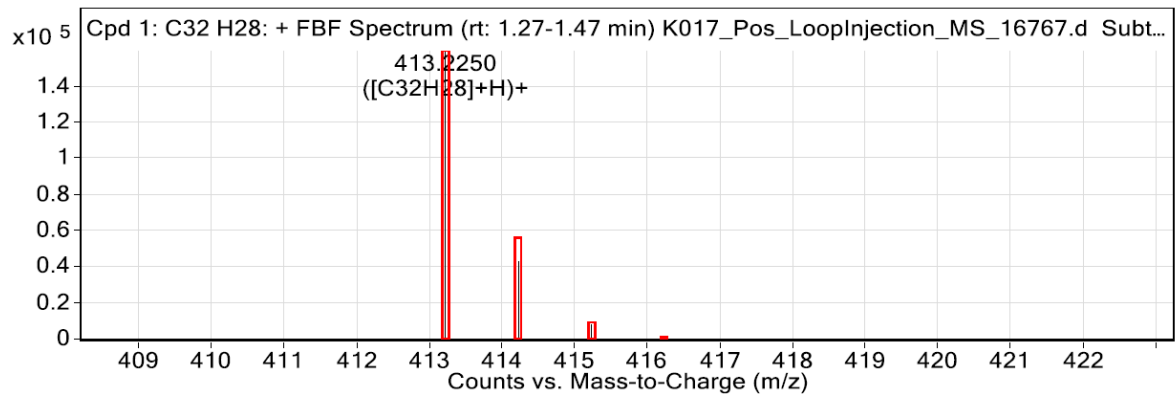

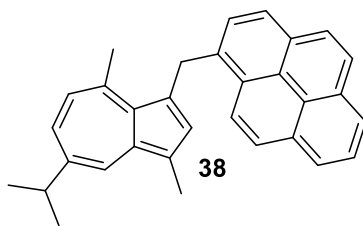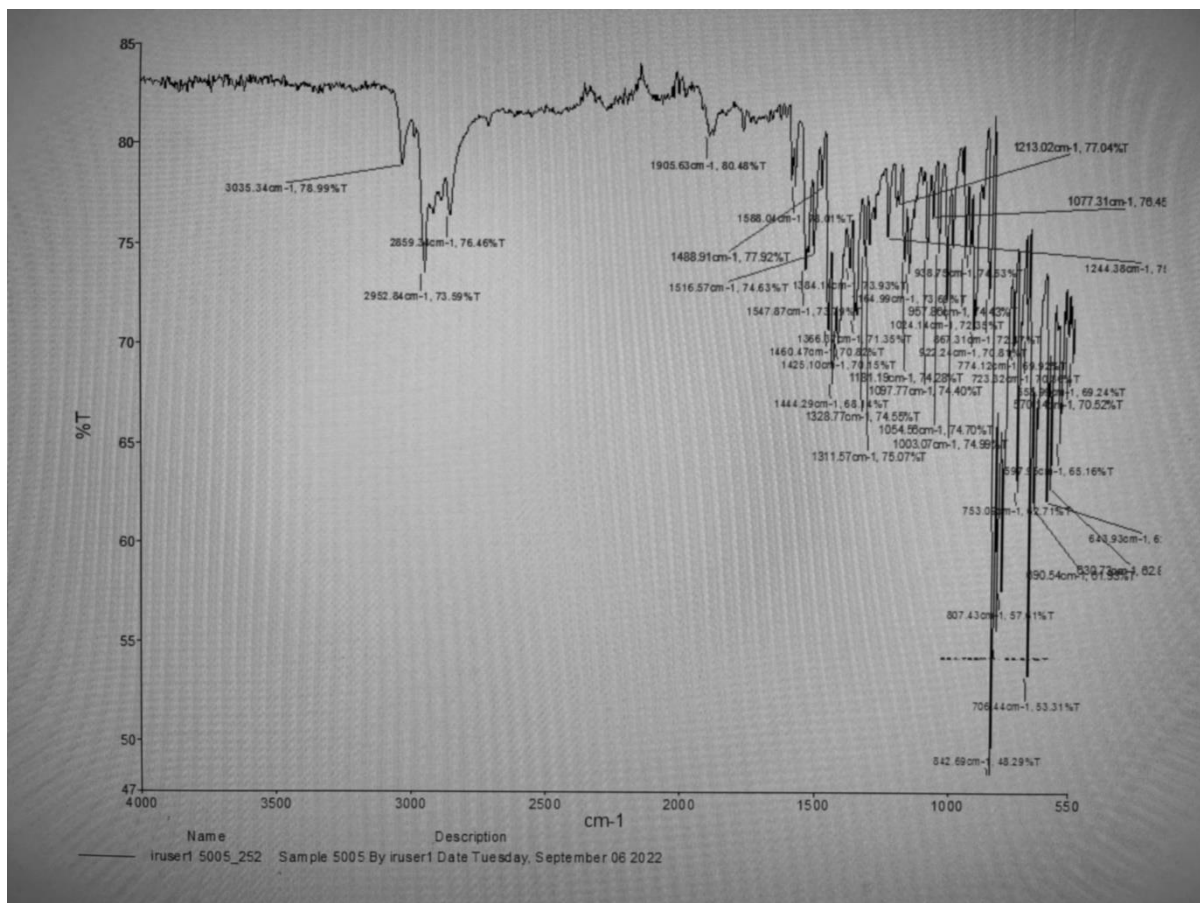

## X-ray crystallographic data

**Table S1:** Crystal data and structure refinement for **25**.

|                                   |                                                  |          |
|-----------------------------------|--------------------------------------------------|----------|
| CCDC code                         | 2129313                                          |          |
| Empirical formula                 | C <sub>30</sub> H <sub>29</sub> F <sub>6</sub> P |          |
| Formula weight                    | 534.50                                           |          |
| Temperature                       | 150.00(10) K                                     |          |
| Wavelength                        | 1.54184 Å                                        |          |
| Crystal system                    | Orthorhombic                                     |          |
| Space group                       | Pbca                                             |          |
| Unit cell dimensions              | a = 10.5171(3) Å                                 | α = 90°. |
|                                   | b = 19.2813(6) Å                                 | β = 90°. |
|                                   | c = 25.1199(8) Å                                 | γ = 90°. |
| Volume                            | 5093.9(3) Å <sup>3</sup>                         |          |
| Z                                 | 8                                                |          |
| Density (calculated)              | 1.394 Mg/m <sup>3</sup>                          |          |
| Absorption coefficient            | 1.505 mm <sup>-1</sup>                           |          |
| F(000)                            | 2224                                             |          |
| Crystal size                      | 0.374 x 0.068 x 0.015 mm <sup>3</sup>            |          |
| Theta range for data collection   | 3.519 to 68.440°.                                |          |
| Index ranges                      | -8<=h<=12, -23<=k<=23, -29<=l<=30                |          |
| Reflections collected             | 32580                                            |          |
| Independent reflections           | 4677 [R(int) = 0.0768]                           |          |
| Completeness to theta = 67.684°   | 100.0 %                                          |          |
| Absorption correction             | Semi-empirical from equivalents                  |          |
| Max. and min. transmission        | 1.00000 and 0.67944                              |          |
| Refinement method                 | Full-matrix least-squares on F <sup>2</sup>      |          |
| Data / restraints / parameters    | 4677 / 0 / 338                                   |          |
| Goodness-of-fit on F <sup>2</sup> | 1.031                                            |          |
| Final R indices [I>2σ(I)]         | R1 = 0.0422, wR2 = 0.0983                        |          |
| R indices (all data)              | R1 = 0.0630, wR2 = 0.1093                        |          |
| Extinction coefficient            | n/a                                              |          |
| Largest diff. peak and hole       | 0.258 and -0.357 e.Å <sup>-3</sup>               |          |

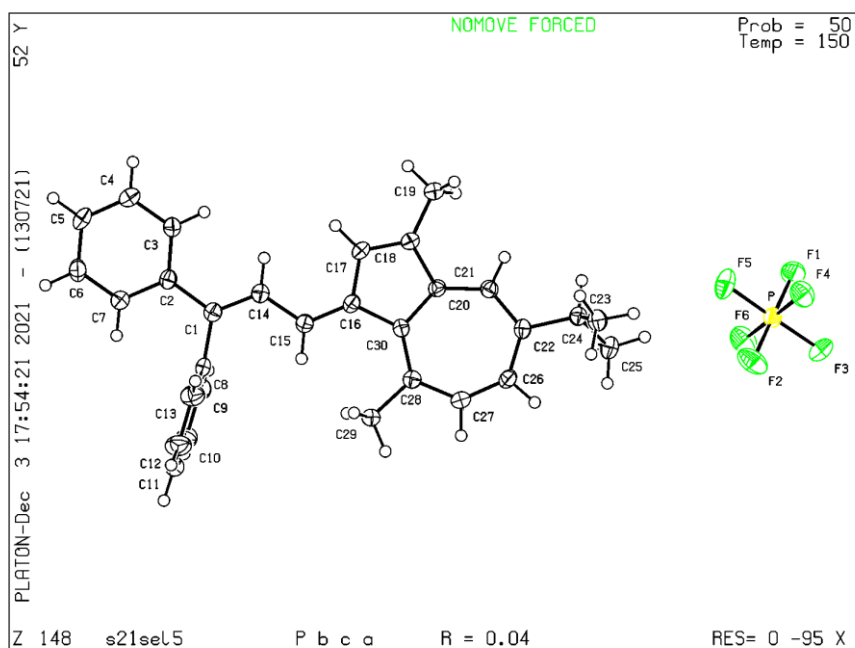

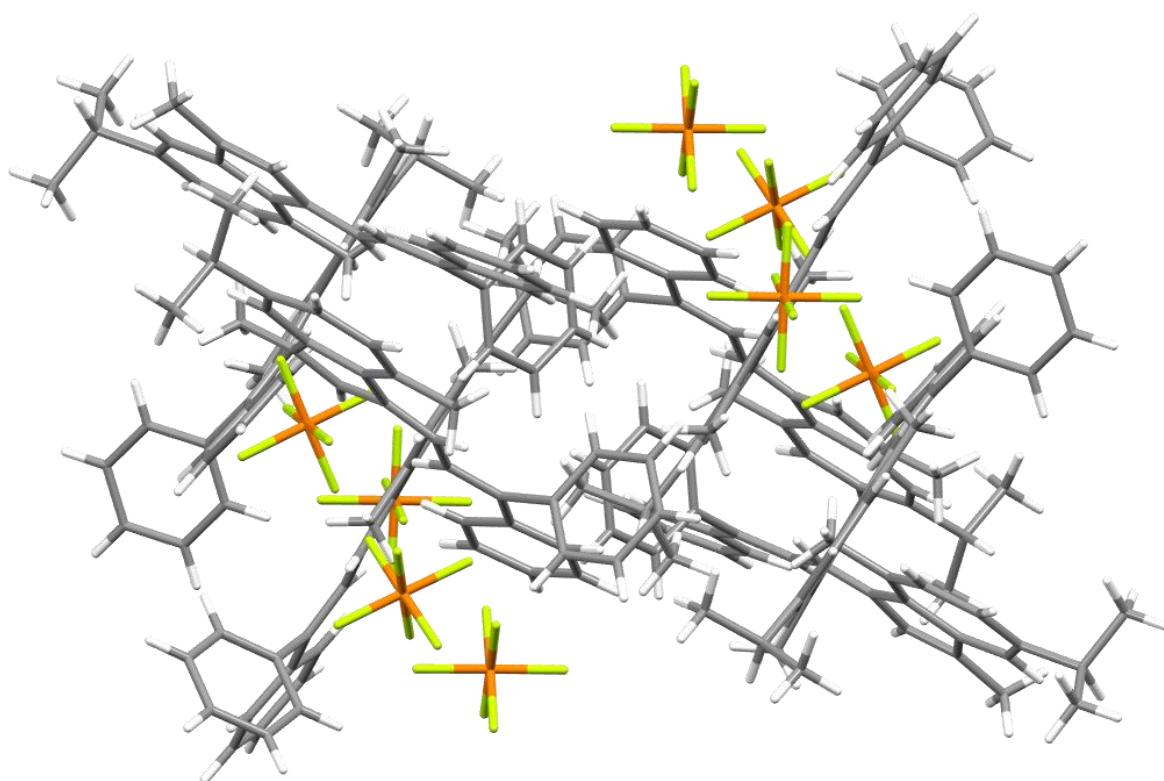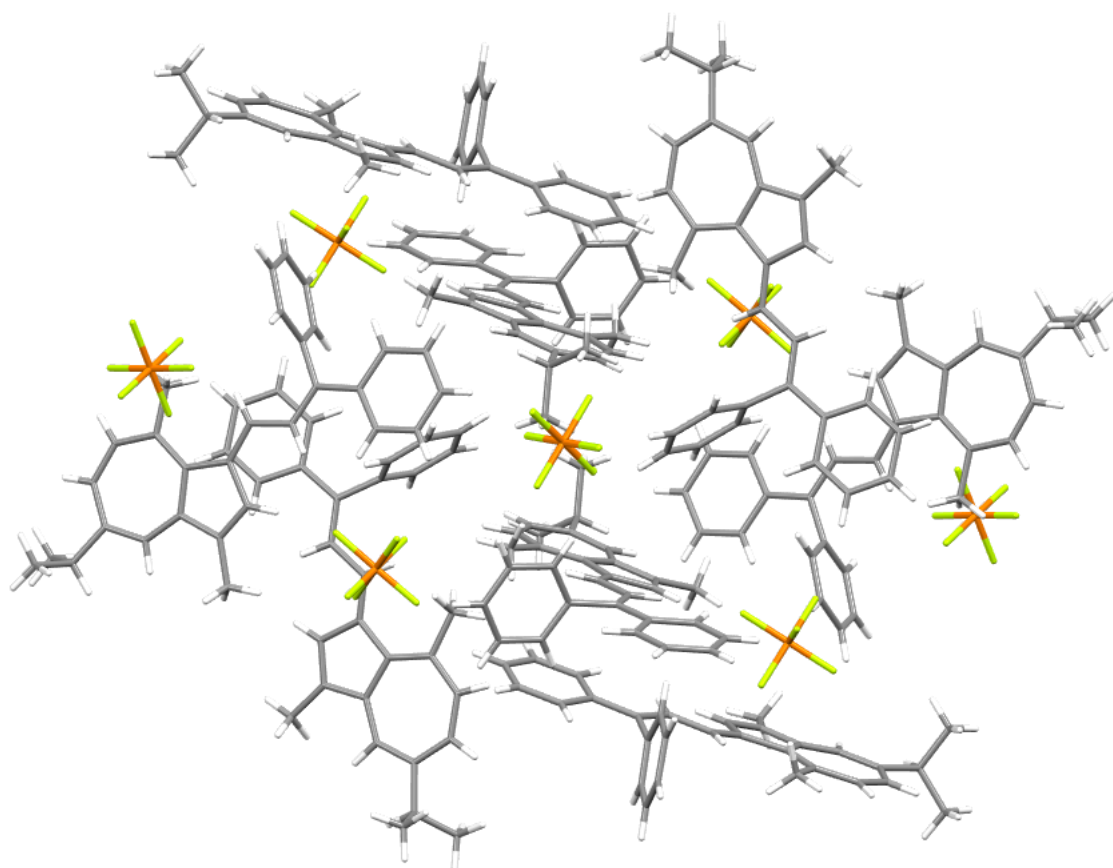



**Table S2:** Atomic coordinates ( $\times 10^4$ ) and equivalent isotropic displacement parameters ( $\text{\AA}^2 \times 10^3$ ) for **25**.  $U(\text{eq})$  is defined as one third of the trace of the orthogonalized  $U^{ij}$  tensor.

|       | x       | y       | z       | U(eq) |
|-------|---------|---------|---------|-------|
| C(1)  | 7550(2) | 1749(1) | 7479(1) | 24(1) |
| C(2)  | 7915(2) | 1601(1) | 8036(1) | 24(1) |
| C(3)  | 7518(2) | 2021(1) | 8460(1) | 26(1) |
| C(4)  | 7854(2) | 1862(1) | 8979(1) | 28(1) |
| C(5)  | 8606(2) | 1290(1) | 9088(1) | 29(1) |
| C(6)  | 9013(2) | 869(1)  | 8674(1) | 32(1) |
| C(7)  | 8665(2) | 1022(1) | 8155(1) | 27(1) |
| C(8)  | 8050(2) | 1261(1) | 7067(1) | 24(1) |
| C(9)  | 7334(2) | 688(1)  | 6919(1) | 34(1) |
| C(10) | 7831(3) | 189(1)  | 6583(1) | 40(1) |
| C(11) | 9055(3) | 263(1)  | 6392(1) | 41(1) |
| C(12) | 9768(2) | 838(2)  | 6523(1) | 43(1) |
| C(13) | 9262(2) | 1337(1) | 6862(1) | 35(1) |
| C(14) | 6750(2) | 2276(1) | 7348(1) | 27(1) |
| C(15) | 6359(2) | 2437(1) | 6817(1) | 25(1) |
| C(16) | 5429(2) | 2914(1) | 6702(1) | 24(1) |
| C(17) | 4716(2) | 3283(1) | 7106(1) | 27(1) |
| C(18) | 3877(2) | 3726(1) | 6886(1) | 27(1) |
| C(19) | 2967(2) | 4186(1) | 7174(1) | 38(1) |
| C(20) | 3998(2) | 3680(1) | 6312(1) | 22(1) |
| C(21) | 3267(2) | 4104(1) | 5983(1) | 23(1) |
| C(22) | 3215(2) | 4151(1) | 5433(1) | 23(1) |
| C(23) | 2386(2) | 4721(1) | 5198(1) | 25(1) |
| C(24) | 3238(2) | 5318(1) | 5014(1) | 30(1) |
| C(25) | 1512(2) | 4473(1) | 4752(1) | 31(1) |
| C(26) | 3902(2) | 3722(1) | 5090(1) | 27(1) |
| C(27) | 4773(2) | 3206(1) | 5198(1) | 25(1) |
| C(28) | 5296(2) | 2945(1) | 5674(1) | 22(1) |
| C(29) | 6265(2) | 2381(1) | 5596(1) | 29(1) |
| C(30) | 4951(2) | 3165(1) | 6186(1) | 20(1) |
| P     | 362(1)  | 6623(1) | 3972(1) | 26(1) |
| F(1)  | -962(1) | 6804(1) | 4249(1) | 40(1) |
| F(2)  | 1683(1) | 6451(1) | 3699(1) | 53(1) |
| F(3)  | -299(2) | 6698(1) | 3402(1) | 50(1) |
| F(4)  | 704(1)  | 7430(1) | 3965(1) | 43(1) |
| F(5)  | 1000(2) | 6558(1) | 4546(1) | 53(1) |
| F(6)  | 8(1)    | 5820(1) | 3982(1) | 49(1) |

**Table S3:** Bond lengths [Å] for **25**.

---

|             |          |              |            |
|-------------|----------|--------------|------------|
| C(1)-C(14)  | 1.360(3) | C(18)-C(19)  | 1.492(3)   |
| C(1)-C(2)   | 1.478(3) | C(19)-H(19A) | 0.9800     |
| C(1)-C(8)   | 1.494(3) | C(19)-H(19B) | 0.9800     |
| C(2)-C(7)   | 1.400(3) | C(19)-H(19C) | 0.9800     |
| C(2)-C(3)   | 1.403(3) | C(20)-C(21)  | 1.393(3)   |
| C(3)-C(4)   | 1.383(3) | C(20)-C(30)  | 1.445(3)   |
| C(3)-H(3)   | 0.9500   | C(21)-C(22)  | 1.387(3)   |
| C(4)-C(5)   | 1.386(3) | C(21)-H(21)  | 0.9500     |
| C(4)-H(4)   | 0.9500   | C(22)-C(26)  | 1.396(3)   |
| C(5)-C(6)   | 1.387(3) | C(22)-C(23)  | 1.521(3)   |
| C(5)-H(5)   | 0.9500   | C(23)-C(25)  | 1.526(3)   |
| C(6)-C(7)   | 1.386(3) | C(23)-C(24)  | 1.532(3)   |
| C(6)-H(6)   | 0.9500   | C(23)-H(23)  | 1.0000     |
| C(7)-H(7)   | 0.9500   | C(24)-H(24A) | 0.9800     |
| C(8)-C(13)  | 1.382(3) | C(24)-H(24B) | 0.9800     |
| C(8)-C(9)   | 1.388(3) | C(24)-H(24C) | 0.9800     |
| C(9)-C(10)  | 1.382(3) | C(25)-H(25A) | 0.9800     |
| C(9)-H(9)   | 0.9500   | C(25)-H(25B) | 0.9800     |
| C(10)-C(11) | 1.383(4) | C(25)-H(25C) | 0.9800     |
| C(10)-H(10) | 0.9500   | C(26)-C(27)  | 1.379(3)   |
| C(11)-C(12) | 1.377(4) | C(26)-H(26)  | 0.9500     |
| C(11)-H(11) | 0.9500   | C(27)-C(28)  | 1.409(3)   |
| C(12)-C(13) | 1.392(4) | C(27)-H(27)  | 0.9500     |
| C(12)-H(12) | 0.9500   | C(28)-C(30)  | 1.402(3)   |
| C(13)-H(13) | 0.9500   | C(28)-C(29)  | 1.503(3)   |
| C(14)-C(15) | 1.430(3) | C(29)-H(29A) | 0.9800     |
| C(14)-H(14) | 0.9500   | C(29)-H(29B) | 0.9800     |
| C(15)-C(16) | 1.372(3) | C(29)-H(29C) | 0.9800     |
| C(15)-H(15) | 0.9500   | P-F(2)       | 1.5839(15) |
| C(16)-C(17) | 1.450(3) | P-F(6)       | 1.5927(15) |
| C(16)-C(30) | 1.473(3) | P-F(5)       | 1.5945(15) |
| C(17)-C(18) | 1.346(3) | P-F(1)       | 1.5957(14) |
| C(17)-H(17) | 0.9500   | P-F(4)       | 1.5986(14) |
| C(18)-C(20) | 1.452(3) | P-F(3)       | 1.5999(15) |

---

**Table S4:** Bond angles [°] for **25**

|                     |            |                     |            |
|---------------------|------------|---------------------|------------|
| C(14)-C(1)-C(2)     | 122.2(2)   | C(21)-C(20)-C(30)   | 131.1(2)   |
| C(14)-C(1)-C(8)     | 121.4(2)   | C(21)-C(20)-C(18)   | 120.27(19) |
| C(2)-C(1)-C(8)      | 116.27(18) | C(30)-C(20)-C(18)   | 108.66(18) |
| C(7)-C(2)-C(3)      | 117.8(2)   | C(22)-C(21)-C(20)   | 130.5(2)   |
| C(7)-C(2)-C(1)      | 120.2(2)   | C(22)-C(21)-H(21)   | 114.7      |
| C(3)-C(2)-C(1)      | 122.06(19) | C(20)-C(21)-H(21)   | 114.7      |
| C(4)-C(3)-C(2)      | 120.8(2)   | C(21)-C(22)-C(26)   | 123.79(19) |
| C(4)-C(3)-H(3)      | 119.6      | C(21)-C(22)-C(23)   | 117.12(19) |
| C(2)-C(3)-H(3)      | 119.6      | C(26)-C(22)-C(23)   | 119.06(19) |
| C(3)-C(4)-C(5)      | 120.6(2)   | C(22)-C(23)-C(25)   | 113.82(18) |
| C(3)-C(4)-H(4)      | 119.7      | C(22)-C(23)-C(24)   | 108.94(17) |
| C(5)-C(4)-H(4)      | 119.7      | C(25)-C(23)-C(24)   | 111.43(18) |
| C(4)-C(5)-C(6)      | 119.5(2)   | C(22)-C(23)-H(23)   | 107.5      |
| C(4)-C(5)-H(5)      | 120.2      | C(25)-C(23)-H(23)   | 107.5      |
| C(6)-C(5)-H(5)      | 120.2      | C(24)-C(23)-H(23)   | 107.5      |
| C(7)-C(6)-C(5)      | 120.1(2)   | C(23)-C(24)-H(24A)  | 109.5      |
| C(7)-C(6)-H(6)      | 120.0      | C(23)-C(24)-H(24B)  | 109.5      |
| C(5)-C(6)-H(6)      | 120.0      | H(24A)-C(24)-H(24B) | 109.5      |
| C(6)-C(7)-C(2)      | 121.3(2)   | C(23)-C(24)-H(24C)  | 109.5      |
| C(6)-C(7)-H(7)      | 119.4      | H(24A)-C(24)-H(24C) | 109.5      |
| C(2)-C(7)-H(7)      | 119.4      | H(24B)-C(24)-H(24C) | 109.5      |
| C(13)-C(8)-C(9)     | 119.0(2)   | C(23)-C(25)-H(25A)  | 109.5      |
| C(13)-C(8)-C(1)     | 121.0(2)   | C(23)-C(25)-H(25B)  | 109.5      |
| C(9)-C(8)-C(1)      | 119.73(19) | H(25A)-C(25)-H(25B) | 109.5      |
| C(10)-C(9)-C(8)     | 120.8(2)   | C(23)-C(25)-H(25C)  | 109.5      |
| C(10)-C(9)-H(9)     | 119.6      | H(25A)-C(25)-H(25C) | 109.5      |
| C(8)-C(9)-H(9)      | 119.6      | H(25B)-C(25)-H(25C) | 109.5      |
| C(9)-C(10)-C(11)    | 119.5(2)   | C(27)-C(26)-C(22)   | 130.6(2)   |
| C(9)-C(10)-H(10)    | 120.2      | C(27)-C(26)-H(26)   | 114.7      |
| C(11)-C(10)-H(10)   | 120.2      | C(22)-C(26)-H(26)   | 114.7      |
| C(12)-C(11)-C(10)   | 120.4(2)   | C(26)-C(27)-C(28)   | 133.1(2)   |
| C(12)-C(11)-H(11)   | 119.8      | C(26)-C(27)-H(27)   | 113.5      |
| C(10)-C(11)-H(11)   | 119.8      | C(28)-C(27)-H(27)   | 113.5      |
| C(11)-C(12)-C(13)   | 119.7(2)   | C(30)-C(28)-C(27)   | 124.68(19) |
| C(11)-C(12)-H(12)   | 120.2      | C(30)-C(28)-C(29)   | 120.92(19) |
| C(13)-C(12)-H(12)   | 120.2      | C(27)-C(28)-C(29)   | 114.38(19) |
| C(8)-C(13)-C(12)    | 120.5(2)   | C(28)-C(29)-H(29A)  | 109.5      |
| C(8)-C(13)-H(13)    | 119.8      | C(28)-C(29)-H(29B)  | 109.5      |
| C(12)-C(13)-H(13)   | 119.8      | H(29A)-C(29)-H(29B) | 109.5      |
| C(1)-C(14)-C(15)    | 124.4(2)   | C(28)-C(29)-H(29C)  | 109.5      |
| C(1)-C(14)-H(14)    | 117.8      | H(29A)-C(29)-H(29C) | 109.5      |
| C(15)-C(14)-H(14)   | 117.8      | H(29B)-C(29)-H(29C) | 109.5      |
| C(16)-C(15)-C(14)   | 123.2(2)   | C(28)-C(30)-C(20)   | 126.02(19) |
| C(16)-C(15)-H(15)   | 118.4      | C(28)-C(30)-C(16)   | 128.26(19) |
| C(14)-C(15)-H(15)   | 118.4      | C(20)-C(30)-C(16)   | 105.69(18) |
| C(15)-C(16)-C(17)   | 123.3(2)   | F(2)-P-F(6)         | 90.49(9)   |
| C(15)-C(16)-C(30)   | 130.5(2)   | F(2)-P-F(5)         | 90.36(10)  |
| C(17)-C(16)-C(30)   | 106.15(18) | F(6)-P-F(5)         | 90.47(9)   |
| C(18)-C(17)-C(16)   | 111.29(19) | F(2)-P-F(1)         | 179.34(10) |
| C(18)-C(17)-H(17)   | 124.4      | F(6)-P-F(1)         | 90.16(8)   |
| C(16)-C(17)-H(17)   | 124.4      | F(5)-P-F(1)         | 89.49(9)   |
| C(17)-C(18)-C(20)   | 108.19(19) | F(2)-P-F(4)         | 90.08(9)   |
| C(17)-C(18)-C(19)   | 126.8(2)   | F(6)-P-F(4)         | 179.42(9)  |
| C(20)-C(18)-C(19)   | 125.0(2)   | F(5)-P-F(4)         | 89.57(9)   |
| C(18)-C(19)-H(19A)  | 109.5      | F(1)-P-F(4)         | 89.27(8)   |
| C(18)-C(19)-H(19B)  | 109.5      | F(2)-P-F(3)         | 90.70(10)  |
| H(19A)-C(19)-H(19B) | 109.5      | F(6)-P-F(3)         | 90.04(9)   |
| C(18)-C(19)-H(19C)  | 109.5      | F(5)-P-F(3)         | 178.82(10) |
| H(19A)-C(19)-H(19C) | 109.5      | F(1)-P-F(3)         | 89.44(8)   |
| H(19B)-C(19)-H(19C) | 109.5      | F(4)-P-F(3)         | 89.91(9)   |

**Table S5:** Anisotropic displacement parameters ( $\text{\AA}^2 \times 10^3$ ) for **25**. The anisotropic displacement factor exponent takes the form:  $-2\pi^2 [ h^2 a^{*2} U^{11} + \dots + 2 h k a^* b^* U^{12} ]$

|       | U <sup>11</sup> | U <sup>22</sup> | U <sup>33</sup> | U <sup>23</sup> | U <sup>13</sup> | U <sup>12</sup> |
|-------|-----------------|-----------------|-----------------|-----------------|-----------------|-----------------|
| C(1)  | 21(1)           | 26(1)           | 24(1)           | 2(1)            | -1(1)           | -2(1)           |
| C(2)  | 21(1)           | 26(1)           | 24(1)           | 3(1)            | -2(1)           | -2(1)           |
| C(3)  | 26(1)           | 27(1)           | 26(1)           | 1(1)            | -3(1)           | 3(1)            |
| C(4)  | 30(1)           | 33(1)           | 22(1)           | -1(1)           | -1(1)           | -4(1)           |
| C(5)  | 29(1)           | 38(1)           | 21(1)           | 6(1)            | -6(1)           | -5(1)           |
| C(6)  | 31(1)           | 31(1)           | 32(1)           | 7(1)            | -4(1)           | 6(1)            |
| C(7)  | 28(1)           | 29(1)           | 24(1)           | 0(1)            | -1(1)           | 3(1)            |
| C(8)  | 27(1)           | 27(1)           | 19(1)           | 4(1)            | -4(1)           | 5(1)            |
| C(9)  | 32(1)           | 35(1)           | 34(1)           | 0(1)            | -1(1)           | -2(1)           |
| C(10) | 56(2)           | 31(1)           | 34(1)           | -3(1)           | -9(1)           | -2(1)           |
| C(11) | 53(2)           | 43(2)           | 28(1)           | -5(1)           | -7(1)           | 21(1)           |
| C(12) | 34(1)           | 60(2)           | 36(2)           | -8(1)           | 7(1)            | 4(1)            |
| C(13) | 29(1)           | 43(1)           | 33(1)           | -5(1)           | 3(1)            | -3(1)           |
| C(14) | 27(1)           | 29(1)           | 24(1)           | 1(1)            | -2(1)           | 4(1)            |
| C(15) | 26(1)           | 25(1)           | 24(1)           | 1(1)            | -1(1)           | 1(1)            |
| C(16) | 27(1)           | 26(1)           | 20(1)           | 2(1)            | -1(1)           | 1(1)            |
| C(17) | 32(1)           | 32(1)           | 17(1)           | 0(1)            | -3(1)           | 4(1)            |
| C(18) | 30(1)           | 30(1)           | 20(1)           | -2(1)           | -1(1)           | 4(1)            |
| C(19) | 47(1)           | 45(2)           | 23(1)           | -4(1)           | 0(1)            | 18(1)           |
| C(20) | 25(1)           | 22(1)           | 21(1)           | -1(1)           | -2(1)           | -1(1)           |
| C(21) | 22(1)           | 23(1)           | 24(1)           | -2(1)           | -2(1)           | 1(1)            |
| C(22) | 21(1)           | 22(1)           | 26(1)           | 2(1)            | -3(1)           | -2(1)           |
| C(23) | 24(1)           | 27(1)           | 24(1)           | 1(1)            | -2(1)           | 2(1)            |
| C(24) | 31(1)           | 27(1)           | 33(1)           | 3(1)            | -1(1)           | 0(1)            |
| C(25) | 30(1)           | 33(1)           | 29(1)           | 4(1)            | -7(1)           | -1(1)           |
| C(26) | 31(1)           | 30(1)           | 19(1)           | 1(1)            | -3(1)           | 1(1)            |
| C(27) | 27(1)           | 28(1)           | 21(1)           | -2(1)           | 2(1)            | -1(1)           |
| C(28) | 21(1)           | 23(1)           | 24(1)           | -1(1)           | -1(1)           | -2(1)           |
| C(29) | 31(1)           | 33(1)           | 22(1)           | -2(1)           | 0(1)            | 9(1)            |
| C(30) | 19(1)           | 18(1)           | 24(1)           | 0(1)            | -3(1)           | -1(1)           |
| P     | 26(1)           | 27(1)           | 26(1)           | 4(1)            | 1(1)            | 1(1)            |
| F(1)  | 33(1)           | 49(1)           | 40(1)           | 1(1)            | 7(1)            | 2(1)            |
| F(2)  | 37(1)           | 47(1)           | 76(1)           | -2(1)           | 24(1)           | 5(1)            |
| F(3)  | 65(1)           | 60(1)           | 24(1)           | -3(1)           | -9(1)           | 8(1)            |
| F(4)  | 47(1)           | 28(1)           | 54(1)           | 4(1)            | 2(1)            | -2(1)           |
| F(5)  | 54(1)           | 62(1)           | 42(1)           | 11(1)           | -21(1)          | 2(1)            |
| F(6)  | 50(1)           | 28(1)           | 68(1)           | 3(1)            | 4(1)            | -4(1)           |

**Table S6:** Hydrogen coordinates ( $\times 10^4$ ) and isotropic displacement parameters ( $\text{\AA}^2 \times 10^{-3}$ ) for **25**.

|        | x     | y    | z    | U(eq) |
|--------|-------|------|------|-------|
| H(3)   | 7012  | 2419 | 8391 | 32    |
| H(4)   | 7568  | 2149 | 9262 | 34    |
| H(5)   | 8842  | 1186 | 9444 | 35    |
| H(6)   | 9530  | 476  | 8746 | 38    |
| H(7)   | 8942  | 727  | 7874 | 33    |
| H(9)   | 6491  | 638  | 7050 | 40    |
| H(10)  | 7334  | -202 | 6485 | 49    |
| H(11)  | 9408  | -84  | 6167 | 50    |
| H(12)  | 10601 | 892  | 6383 | 52    |
| H(13)  | 9753  | 1733 | 6954 | 42    |
| H(14)  | 6430  | 2557 | 7629 | 32    |
| H(15)  | 6762  | 2203 | 6530 | 30    |
| H(17)  | 4827  | 3221 | 7478 | 33    |
| H(19A) | 3202  | 4672 | 7114 | 57    |
| H(19B) | 2999  | 4084 | 7556 | 57    |
| H(19C) | 2104  | 4106 | 7041 | 57    |
| H(21)  | 2713  | 4412 | 6167 | 28    |
| H(23)  | 1834  | 4902 | 5491 | 30    |
| H(24A) | 3855  | 5145 | 4753 | 45    |
| H(24B) | 3691  | 5512 | 5320 | 45    |
| H(24C) | 2714  | 5680 | 4849 | 45    |
| H(25A) | 986   | 4861 | 4628 | 46    |
| H(25B) | 963   | 4101 | 4885 | 46    |
| H(25C) | 2027  | 4299 | 4455 | 46    |
| H(26)  | 3744  | 3798 | 4722 | 32    |
| H(27)  | 5084  | 2981 | 4887 | 30    |
| H(29A) | 6323  | 2265 | 5217 | 43    |
| H(29B) | 6008  | 1968 | 5797 | 43    |
| H(29C) | 7095  | 2541 | 5723 | 43    |

**Table S7:** Torsion angles [°] for **25**.

|                         |             |                         |             |
|-------------------------|-------------|-------------------------|-------------|
| C(14)-C(1)-C(2)-C(7)    | 175.3(2)    | C(16)-C(17)-C(18)-C(20) | -0.7(3)     |
| C(8)-C(1)-C(2)-C(7)     | -1.4(3)     | C(16)-C(17)-C(18)-C(19) | 179.1(2)    |
| C(14)-C(1)-C(2)-C(3)    | -3.8(3)     | C(17)-C(18)-C(20)-C(21) | -177.7(2)   |
| C(8)-C(1)-C(2)-C(3)     | 179.54(19)  | C(19)-C(18)-C(20)-C(21) | 2.5(3)      |
| C(7)-C(2)-C(3)-C(4)     | -0.3(3)     | C(17)-C(18)-C(20)-C(30) | 1.4(2)      |
| C(1)-C(2)-C(3)-C(4)     | 178.78(19)  | C(19)-C(18)-C(20)-C(30) | -178.4(2)   |
| C(2)-C(3)-C(4)-C(5)     | 0.9(3)      | C(30)-C(20)-C(21)-C(22) | 1.5(4)      |
| C(3)-C(4)-C(5)-C(6)     | -0.6(3)     | C(18)-C(20)-C(21)-C(22) | -179.7(2)   |
| C(4)-C(5)-C(6)-C(7)     | -0.1(3)     | C(20)-C(21)-C(22)-C(26) | 3.4(4)      |
| C(5)-C(6)-C(7)-C(2)     | 0.6(3)      | C(20)-C(21)-C(22)-C(23) | -174.7(2)   |
| C(3)-C(2)-C(7)-C(6)     | -0.4(3)     | C(21)-C(22)-C(23)-C(25) | -132.7(2)   |
| C(1)-C(2)-C(7)-C(6)     | -179.5(2)   | C(26)-C(22)-C(23)-C(25) | 49.1(3)     |
| C(14)-C(1)-C(8)-C(13)   | 100.5(3)    | C(21)-C(22)-C(23)-C(24) | 102.3(2)    |
| C(2)-C(1)-C(8)-C(13)    | -82.8(3)    | C(26)-C(22)-C(23)-C(24) | -75.9(2)    |
| C(14)-C(1)-C(8)-C(9)    | -85.1(3)    | C(21)-C(22)-C(26)-C(27) | -2.8(4)     |
| C(2)-C(1)-C(8)-C(9)     | 91.5(2)     | C(23)-C(22)-C(26)-C(27) | 175.2(2)    |
| C(13)-C(8)-C(9)-C(10)   | 1.6(4)      | C(22)-C(26)-C(27)-C(28) | -2.0(4)     |
| C(1)-C(8)-C(9)-C(10)    | -172.9(2)   | C(26)-C(27)-C(28)-C(30) | 3.2(4)      |
| C(8)-C(9)-C(10)-C(11)   | -0.2(4)     | C(26)-C(27)-C(28)-C(29) | -178.2(2)   |
| C(9)-C(10)-C(11)-C(12)  | -1.5(4)     | C(27)-C(28)-C(30)-C(20) | 1.3(3)      |
| C(10)-C(11)-C(12)-C(13) | 1.6(4)      | C(29)-C(28)-C(30)-C(20) | -177.26(19) |
| C(9)-C(8)-C(13)-C(12)   | -1.5(4)     | C(27)-C(28)-C(30)-C(16) | 178.8(2)    |
| C(1)-C(8)-C(13)-C(12)   | 172.9(2)    | C(29)-C(28)-C(30)-C(16) | 0.3(3)      |
| C(11)-C(12)-C(13)-C(8)  | -0.1(4)     | C(21)-C(20)-C(30)-C(28) | -4.5(4)     |
| C(2)-C(1)-C(14)-C(15)   | -179.44(19) | C(18)-C(20)-C(30)-C(28) | 176.49(19)  |
| C(8)-C(1)-C(14)-C(15)   | -3.0(3)     | C(21)-C(20)-C(30)-C(16) | 177.5(2)    |
| C(1)-C(14)-C(15)-C(16)  | 171.4(2)    | C(18)-C(20)-C(30)-C(16) | -1.5(2)     |
| C(14)-C(15)-C(16)-C(17) | -2.3(3)     | C(15)-C(16)-C(30)-C(28) | 3.8(4)      |
| C(14)-C(15)-C(16)-C(30) | 176.8(2)    | C(17)-C(16)-C(30)-C(28) | -176.9(2)   |
| C(15)-C(16)-C(17)-C(18) | 179.1(2)    | C(15)-C(16)-C(30)-C(20) | -178.2(2)   |
| C(30)-C(16)-C(17)-C(18) | -0.2(3)     | C(17)-C(16)-C(30)-C(20) | 1.1(2)      |

**Table S8:** Crystal data and structure refinement for **26**.

|                                   |                                                    |          |
|-----------------------------------|----------------------------------------------------|----------|
| CCDC code                         | #2129312                                           |          |
| Empirical formula                 | C <sub>22</sub> H <sub>22</sub> BrF <sub>6</sub> P |          |
| Formula weight                    | 511.27                                             |          |
| Temperature                       | 150.00(10) K                                       |          |
| Wavelength                        | 1.54184 Å                                          |          |
| Crystal system                    | Orthorhombic                                       |          |
| Space group                       | P2 <sub>1</sub> 2 <sub>1</sub> 2 <sub>1</sub>      |          |
| Unit cell dimensions              | a = 7.5877(2) Å                                    | α = 90°. |
|                                   | b = 26.8100(12) Å                                  | β = 90°. |
|                                   | c = 31.9061(9) Å                                   | γ = 90°. |
| Volume                            | 6490.5(4) Å <sup>3</sup>                           |          |
| Z                                 | 12                                                 |          |
| Density (calculated)              | 1.570 Mg/m <sup>3</sup>                            |          |
| Absorption coefficient            | 3.820 mm <sup>-1</sup>                             |          |
| F(000)                            | 3096                                               |          |
| Crystal size                      | 0.234 x 0.101 x 0.025 mm <sup>3</sup>              |          |
| Theta range for data collection   | 4.308 to 68.808°.                                  |          |
| Index ranges                      | -8 ≤ h ≤ 9, -32 ≤ k ≤ 32, -28 ≤ l ≤ 38             |          |
| Reflections collected             | 44869                                              |          |
| Independent reflections           | 11920 [R(int) = 0.0738]                            |          |
| Completeness to theta = 67.684°   | 99.9 %                                             |          |
| Absorption correction             | Semi-empirical from equivalents                    |          |
| Max. and min. transmission        | 1.00000 and 0.63398                                |          |
| Refinement method                 | Full-matrix least-squares on F <sup>2</sup>        |          |
| Data / restraints / parameters    | 11920 / 0 / 897                                    |          |
| Goodness-of-fit on F <sup>2</sup> | 1.008                                              |          |
| Final R indices [I > 2σ(I)]       | R1 = 0.0568, wR2 = 0.1239                          |          |
| R indices (all data)              | R1 = 0.0841, wR2 = 0.1370                          |          |
| Absolute structure parameter      | 0.003(13)                                          |          |
| Extinction coefficient            | n/a                                                |          |
| Largest diff. peak and hole       | 0.906 and -0.689 e.Å <sup>-3</sup>                 |          |

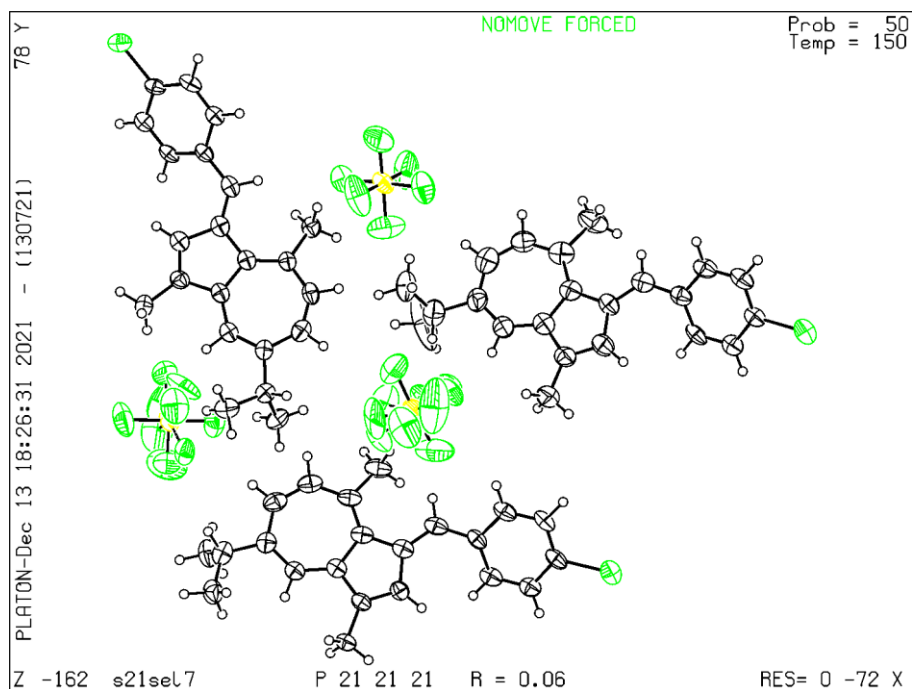

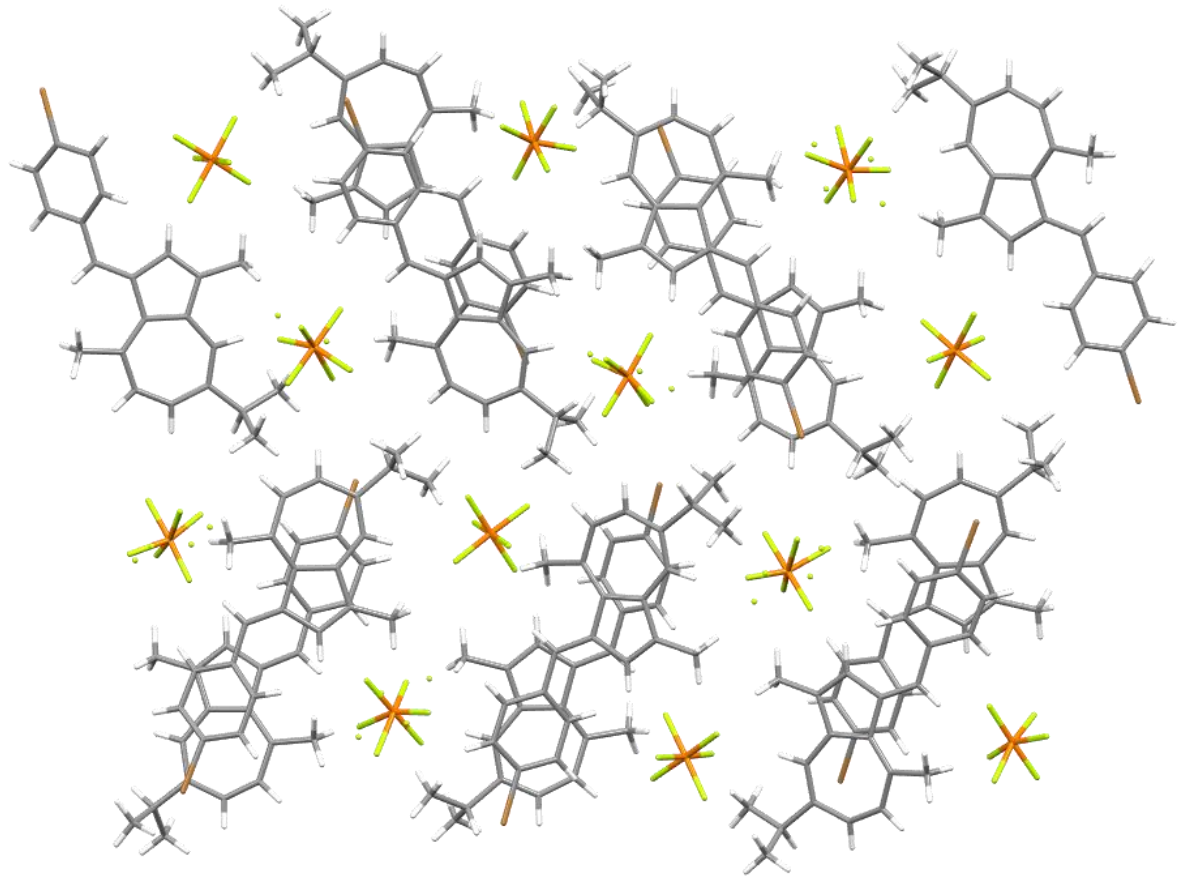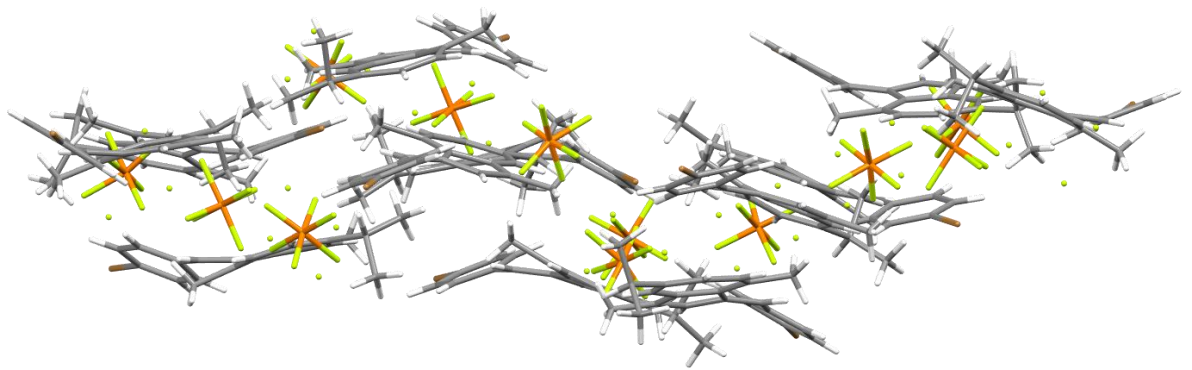



**Table S9:** Atomic coordinates ( $\times 10^4$ ) and equivalent isotropic displacement parameters ( $\text{\AA}^2 \times 10^3$ ) for **26**.  $U(\text{eq})$  is defined as one third of the trace of the orthogonalized  $U^{ij}$  tensor.

|       | x         | y       | z       | U(eq)   |
|-------|-----------|---------|---------|---------|
| Br(1) | 10063(1)  | 441(1)  | 5786(1) | 51(1)   |
| C(1)  | 9331(11)  | 2614(3) | 5228(2) | 40(2)   |
| C(2)  | 9391(10)  | 2096(3) | 5356(2) | 36(2)   |
| C(3)  | 10139(10) | 1977(3) | 5750(2) | 37(2)   |
| C(4)  | 10305(10) | 1492(4) | 5880(2) | 42(2)   |
| C(5)  | 9724(10)  | 1115(3) | 5624(2) | 37(2)   |
| C(6)  | 8923(10)  | 1213(3) | 5242(2) | 38(2)   |
| C(7)  | 8749(10)  | 1699(3) | 5121(2) | 36(2)   |
| C(8)  | 9391(10)  | 2802(3) | 4826(3) | 38(2)   |
| C(9)  | 9749(11)  | 2511(3) | 4450(3) | 41(2)   |
| C(10) | 10055(12) | 2811(3) | 4128(2) | 40(2)   |
| C(11) | 10527(15) | 2657(4) | 3690(3) | 54(3)   |
| C(12) | 9911(11)  | 3324(3) | 4262(2) | 38(2)   |
| C(13) | 10242(10) | 3722(3) | 3986(2) | 37(2)   |
| C(14) | 10274(10) | 4223(3) | 4053(2) | 36(2)   |
| C(15) | 10709(11) | 4577(3) | 3697(3) | 42(2)   |
| C(16) | 11775(13) | 4346(4) | 3346(3) | 55(3)   |
| C(17) | 8994(13)  | 4798(3) | 3523(3) | 50(2)   |
| C(18) | 9854(11)  | 4446(3) | 4439(3) | 45(2)   |
| C(19) | 9250(11)  | 4238(3) | 4808(3) | 42(2)   |
| C(20) | 8969(10)  | 3741(3) | 4934(2) | 36(2)   |
| C(21) | 8072(12)  | 3689(4) | 5361(3) | 44(2)   |
| C(22) | 9417(10)  | 3332(3) | 4700(2) | 35(2)   |
| Br(2) | 6129(1)   | 9512(1) | 7492(1) | 58(1)   |
| C(31) | 4774(12)  | 7379(4) | 6893(3) | 51(2)   |
| C(32) | 5066(12)  | 7894(4) | 7016(3) | 46(2)   |
| C(33) | 5781(13)  | 7983(4) | 7412(3) | 51(2)   |
| C(34) | 6114(12)  | 8463(4) | 7553(3) | 51(2)   |
| C(35) | 5664(11)  | 8854(4) | 7300(2) | 42(2)   |
| C(36) | 4888(12)  | 8785(4) | 6910(3) | 46(2)   |
| C(37) | 4593(10)  | 8311(4) | 6773(2) | 44(2)   |
| C(38) | 4729(11)  | 7184(4) | 6491(3) | 45(2)   |
| C(39) | 4405(11)  | 6662(4) | 6370(3) | 47(2)   |
| C(40) | 3896(12)  | 6262(4) | 6623(3) | 55(3)   |
| C(41) | 3448(17)  | 6333(5) | 7084(3) | 81(4)   |
| C(42) | 3759(14)  | 5771(4) | 6485(3) | 58(3)   |
| C(43) | 3929(14)  | 5542(5) | 6102(4) | 66(3)   |
| C(44) | 4291(14)  | 5748(4) | 5709(3) | 59(3)   |
| C(45) | 4390(20)  | 5396(5) | 5331(4) | 85(4)   |
| C(46) | 2750(20)  | 5274(9) | 5161(5) | 191(13) |
| C(47) | 5659(15)  | 4980(4) | 5406(4) | 72(3)   |
| C(48) | 4658(12)  | 6240(4) | 5643(3) | 53(2)   |
| C(49) | 4724(12)  | 6645(4) | 5921(3) | 50(2)   |
| C(50) | 5180(13)  | 7135(4) | 5780(3) | 52(2)   |
| C(51) | 5589(17)  | 7272(4) | 5338(3) | 70(3)   |
| C(52) | 5178(13)  | 7446(4) | 6113(3) | 55(2)   |
| Br(3) | 4237(2)   | 9148(1) | 4201(1) | 59(1)   |
| C(61) | 4963(12)  | 7022(4) | 3530(3) | 45(2)   |
| C(62) | 4831(11)  | 7537(3) | 3666(2) | 41(2)   |
| C(63) | 5323(11)  | 7653(4) | 4086(3) | 48(2)   |
| C(64) | 5142(12)  | 8125(4) | 4245(3) | 45(2)   |
| C(65) | 4505(11)  | 8493(4) | 3983(2) | 46(2)   |
| C(66) | 3996(12)  | 8399(4) | 3573(2) | 45(2)   |
| C(67) | 4134(11)  | 7921(4) | 3423(3) | 45(2)   |
| C(68) | 5116(11)  | 6850(3) | 3132(2) | 40(2)   |

|        |           |          |          |         |
|--------|-----------|----------|----------|---------|
| C(69)  | 5277(10)  | 6327(3)  | 3001(2)  | 40(2)   |
| C(70)  | 4854(11)  | 5899(4)  | 3233(2)  | 44(2)   |
| C(71)  | 3885(14)  | 5928(4)  | 3649(3)  | 58(3)   |
| C(72)  | 5306(12)  | 5408(4)  | 3117(3)  | 50(2)   |
| C(73)  | 5961(13)  | 5214(4)  | 2753(3)  | 52(2)   |
| C(74)  | 6301(10)  | 5441(4)  | 2357(3)  | 42(2)   |
| C(75)  | 6695(13)  | 5082(4)  | 2000(3)  | 52(2)   |
| C(76)  | 7570(14)  | 5316(4)  | 1623(3)  | 60(3)   |
| C(77)  | 4937(14)  | 4834(4)  | 1883(3)  | 63(3)   |
| C(78)  | 6178(10)  | 5940(3)  | 2290(2)  | 37(2)   |
| C(79)  | 5810(10)  | 6337(3)  | 2565(2)  | 36(2)   |
| C(80)  | 5858(11)  | 6845(3)  | 2431(2)  | 37(2)   |
| C(81)  | 6342(14)  | 7009(4)  | 1997(2)  | 49(2)   |
| C(82)  | 5463(11)  | 7140(3)  | 2757(2)  | 39(2)   |
| P(1)   | 2581(3)   | 3806(1)  | 6103(1)  | 52(1)   |
| F(1)   | 1860(8)   | 3310(2)  | 5875(2)  | 69(2)   |
| F(2)   | 3302(10)  | 4300(3)  | 6321(2)  | 88(2)   |
| F(3)   | 3329(16)  | 3480(4)  | 6460(2)  | 136(4)  |
| F(4)   | 764(12)   | 3853(3)  | 6329(3)  | 119(3)  |
| F(5)   | 1871(11)  | 4125(3)  | 5730(3)  | 110(3)  |
| F(6)   | 4384(9)   | 3734(3)  | 5863(2)  | 111(3)  |
| P(2)   | 8513(4)   | 6122(1)  | 4437(1)  | 60(1)   |
| F(7)   | 7855(12)  | 6610(4)  | 4213(3)  | 127(3)  |
| F(8)   | 9048(17)  | 5651(3)  | 4677(3)  | 134(4)  |
| F(9)   | 7070(30)  | 5696(8)  | 4279(10) | 119(12) |
| F(10)  | 7370(60)  | 6258(12) | 4834(8)  | 157(19) |
| F(11)  | 10100(40) | 6401(12) | 4624(16) | 186(18) |
| F(12)  | 9950(30)  | 5865(10) | 4146(7)  | 134(12) |
| F(9A)  | 7990(19)  | 5933(6)  | 3988(4)  | 88(5)   |
| F(10A) | 6530(20)  | 6119(9)  | 4574(5)  | 127(9)  |
| F(11A) | 9060(30)  | 6418(6)  | 4826(4)  | 94(6)   |
| F(12A) | 10368(17) | 6269(9)  | 4259(6)  | 128(8)  |
| P(3)   | 6612(4)   | 3541(1)  | 2805(1)  | 53(1)   |
| F(13)  | 5757(10)  | 3974(3)  | 3066(2)  | 89(2)   |
| F(14)  | 7472(11)  | 3104(3)  | 2544(2)  | 102(3)  |
| F(15)  | 5550(40)  | 3785(17) | 2400(9)  | 129(13) |
| F(16)  | 5130(40)  | 3231(9)  | 2897(13) | 112(13) |
| F(17)  | 7620(40)  | 3499(12) | 3202(5)  | 99(10)  |
| F(18)  | 8050(20)  | 4015(7)  | 2657(7)  | 65(7)   |
| F(15A) | 4760(20)  | 3386(9)  | 2618(8)  | 137(11) |
| F(16A) | 6240(30)  | 3128(5)  | 3179(4)  | 93(6)   |
| F(17A) | 8473(18)  | 3597(6)  | 2992(6)  | 98(6)   |
| F(18A) | 6940(30)  | 3852(6)  | 2432(4)  | 110(7)  |

---

**Table S10:** Bond lengths [Å] for **26**.

|              |           |              |           |
|--------------|-----------|--------------|-----------|
| Br(1)-C(5)   | 1.897(9)  | C(36)-C(37)  | 1.364(13) |
| C(1)-C(8)    | 1.381(11) | C(36)-H(36)  | 0.9500    |
| C(1)-C(2)    | 1.449(12) | C(37)-H(37)  | 0.9500    |
| C(1)-H(1)    | 0.9500    | C(38)-C(52)  | 1.436(13) |
| C(2)-C(7)    | 1.391(11) | C(38)-C(39)  | 1.472(14) |
| C(2)-C(3)    | 1.415(11) | C(39)-C(40)  | 1.398(13) |
| C(3)-C(4)    | 1.373(12) | C(39)-C(49)  | 1.454(12) |
| C(3)-H(3)    | 0.9500    | C(40)-C(42)  | 1.393(15) |
| C(4)-C(5)    | 1.373(12) | C(40)-C(41)  | 1.520(14) |
| C(4)-H(4)    | 0.9500    | C(41)-H(41A) | 0.9800    |
| C(5)-C(6)    | 1.388(11) | C(41)-H(41B) | 0.9800    |
| C(6)-C(7)    | 1.365(12) | C(41)-H(41C) | 0.9800    |
| C(6)-H(6)    | 0.9500    | C(42)-C(43)  | 1.374(14) |
| C(7)-H(7)    | 0.9500    | C(42)-H(42)  | 0.9500    |
| C(8)-C(9)    | 1.457(11) | C(43)-C(44)  | 1.398(15) |
| C(8)-C(22)   | 1.475(12) | C(43)-H(43)  | 0.9500    |
| C(9)-C(10)   | 1.324(11) | C(44)-C(48)  | 1.362(14) |
| C(9)-H(9)    | 0.9500    | C(44)-C(45)  | 1.533(14) |
| C(10)-C(12)  | 1.446(12) | C(45)-C(46)  | 1.40(2)   |
| C(10)-C(11)  | 1.502(11) | C(45)-C(47)  | 1.492(16) |
| C(11)-H(11A) | 0.9800    | C(45)-H(45)  | 1.0000    |
| C(11)-H(11B) | 0.9800    | C(46)-H(46A) | 0.9800    |
| C(11)-H(11C) | 0.9800    | C(46)-H(46B) | 0.9800    |
| C(12)-C(13)  | 1.406(11) | C(46)-H(46C) | 0.9800    |
| C(12)-C(22)  | 1.445(11) | C(47)-H(47A) | 0.9800    |
| C(13)-C(14)  | 1.362(11) | C(47)-H(47B) | 0.9800    |
| C(13)-H(13)  | 0.9500    | C(47)-H(47C) | 0.9800    |
| C(14)-C(18)  | 1.407(11) | C(48)-C(49)  | 1.403(13) |
| C(14)-C(15)  | 1.516(11) | C(48)-H(48)  | 0.9500    |
| C(15)-C(16)  | 1.514(12) | C(49)-C(50)  | 1.431(14) |
| C(15)-C(17)  | 1.533(12) | C(50)-C(52)  | 1.350(13) |
| C(15)-H(15)  | 1.0000    | C(50)-C(51)  | 1.490(13) |
| C(16)-H(16A) | 0.9800    | C(51)-H(51A) | 0.9800    |
| C(16)-H(16B) | 0.9800    | C(51)-H(51B) | 0.9800    |
| C(16)-H(16C) | 0.9800    | C(51)-H(51C) | 0.9800    |
| C(17)-H(17A) | 0.9800    | C(52)-H(52)  | 0.9500    |
| C(17)-H(17B) | 0.9800    | Br(3)-C(65)  | 1.900(10) |
| C(17)-H(17C) | 0.9800    | C(61)-C(68)  | 1.356(11) |
| C(18)-C(19)  | 1.381(12) | C(61)-C(62)  | 1.453(12) |
| C(18)-H(18)  | 0.9500    | C(61)-H(61)  | 0.9500    |
| C(19)-C(20)  | 1.408(12) | C(62)-C(67)  | 1.393(12) |
| C(19)-H(19)  | 0.9500    | C(62)-C(63)  | 1.424(11) |
| C(20)-C(22)  | 1.371(11) | C(63)-C(64)  | 1.370(13) |
| C(20)-C(21)  | 1.530(11) | C(63)-H(63)  | 0.9500    |
| C(21)-H(21A) | 0.9800    | C(64)-C(65)  | 1.379(13) |
| C(21)-H(21B) | 0.9800    | C(64)-H(64)  | 0.9500    |
| C(21)-H(21C) | 0.9800    | C(65)-C(66)  | 1.388(11) |
| Br(2)-C(35)  | 1.899(10) | C(66)-C(67)  | 1.372(13) |
| C(31)-C(38)  | 1.386(12) | C(66)-H(66)  | 0.9500    |
| C(31)-C(32)  | 1.454(14) | C(67)-H(67)  | 0.9500    |
| C(31)-H(31)  | 0.9500    | C(68)-C(82)  | 1.450(11) |
| C(32)-C(33)  | 1.395(12) | C(68)-C(69)  | 1.467(13) |
| C(32)-C(37)  | 1.407(13) | C(69)-C(70)  | 1.403(12) |
| C(33)-C(34)  | 1.387(14) | C(69)-C(79)  | 1.451(11) |
| C(33)-H(33)  | 0.9500    | C(70)-C(72)  | 1.408(14) |
| C(34)-C(35)  | 1.366(13) | C(70)-C(71)  | 1.520(12) |
| C(34)-H(34)  | 0.9500    | C(71)-H(71A) | 0.9800    |
| C(35)-C(36)  | 1.389(11) | C(71)-H(71B) | 0.9800    |

|              |           |             |           |
|--------------|-----------|-------------|-----------|
| C(71)-H(71C) | 0.9800    | P(1)-F(4)   | 1.561(8)  |
| C(72)-C(73)  | 1.367(13) | P(1)-F(5)   | 1.562(7)  |
| C(72)-H(72)  | 0.9500    | P(1)-F(6)   | 1.580(7)  |
| C(73)-C(74)  | 1.427(12) | P(1)-F(2)   | 1.595(7)  |
| C(73)-H(73)  | 0.9500    | P(1)-F(1)   | 1.611(7)  |
| C(74)-C(78)  | 1.358(13) | P(2)-F(11A) | 1.529(13) |
| C(74)-C(75)  | 1.521(12) | P(2)-F(8)   | 1.532(9)  |
| C(75)-C(76)  | 1.509(13) | P(2)-F(11)  | 1.54(3)   |
| C(75)-C(77)  | 1.537(13) | P(2)-F(10A) | 1.567(15) |
| C(75)-H(75)  | 1.0000    | P(2)-F(12A) | 1.568(17) |
| C(76)-H(76A) | 0.9800    | P(2)-F(7)   | 1.570(9)  |
| C(76)-H(76B) | 0.9800    | P(2)-F(9A)  | 1.572(11) |
| C(76)-H(76C) | 0.9800    | P(2)-F(10)  | 1.58(2)   |
| C(77)-H(77A) | 0.9800    | P(2)-F(12)  | 1.588(17) |
| C(77)-H(77B) | 0.9800    | P(2)-F(9)   | 1.663(19) |
| C(77)-H(77C) | 0.9800    | P(3)-F(16)  | 1.43(2)   |
| C(78)-C(79)  | 1.406(11) | P(3)-F(18A) | 1.475(13) |
| C(78)-H(78)  | 0.9500    | P(3)-F(17)  | 1.483(19) |
| C(79)-C(80)  | 1.427(12) | P(3)-F(17A) | 1.540(11) |
| C(80)-C(82)  | 1.342(11) | P(3)-F(13)  | 1.568(7)  |
| C(80)-C(81)  | 1.498(10) | P(3)-F(14)  | 1.579(7)  |
| C(81)-H(81A) | 0.9800    | P(3)-F(15A) | 1.583(15) |
| C(81)-H(81B) | 0.9800    | P(3)-F(16A) | 1.652(12) |
| C(81)-H(81C) | 0.9800    | P(3)-F(15)  | 1.66(3)   |
| C(82)-H(82)  | 0.9500    | P(3)-F(18)  | 1.740(17) |
| P(1)-F(3)    | 1.545(8)  |             |           |

---

**Table S11:** Bond angles [°] for **26**.

|                     |          |                     |           |
|---------------------|----------|---------------------|-----------|
| C(8)-C(1)-C(2)      | 127.7(8) | C(15)-C(17)-H(17B)  | 109.5     |
| C(8)-C(1)-H(1)      | 116.2    | H(17A)-C(17)-H(17B) | 109.5     |
| C(2)-C(1)-H(1)      | 116.2    | C(15)-C(17)-H(17C)  | 109.5     |
| C(7)-C(2)-C(3)      | 116.7(8) | H(17A)-C(17)-H(17C) | 109.5     |
| C(7)-C(2)-C(1)      | 124.8(7) | H(17B)-C(17)-H(17C) | 109.5     |
| C(3)-C(2)-C(1)      | 118.5(8) | C(19)-C(18)-C(14)   | 130.6(8)  |
| C(4)-C(3)-C(2)      | 121.3(8) | C(19)-C(18)-H(18)   | 114.7     |
| C(4)-C(3)-H(3)      | 119.4    | C(14)-C(18)-H(18)   | 114.7     |
| C(2)-C(3)-H(3)      | 119.4    | C(18)-C(19)-C(20)   | 132.6(8)  |
| C(3)-C(4)-C(5)      | 119.2(7) | C(18)-C(19)-H(19)   | 113.7     |
| C(3)-C(4)-H(4)      | 120.4    | C(20)-C(19)-H(19)   | 113.7     |
| C(5)-C(4)-H(4)      | 120.4    | C(22)-C(20)-C(19)   | 124.3(8)  |
| C(4)-C(5)-C(6)      | 121.6(8) | C(22)-C(20)-C(21)   | 121.6(8)  |
| C(4)-C(5)-Br(1)     | 119.6(6) | C(19)-C(20)-C(21)   | 114.1(7)  |
| C(6)-C(5)-Br(1)     | 118.7(7) | C(20)-C(21)-H(21A)  | 109.5     |
| C(7)-C(6)-C(5)      | 118.2(8) | C(20)-C(21)-H(21B)  | 109.5     |
| C(7)-C(6)-H(6)      | 120.9    | H(21A)-C(21)-H(21B) | 109.5     |
| C(5)-C(6)-H(6)      | 120.9    | C(20)-C(21)-H(21C)  | 109.5     |
| C(6)-C(7)-C(2)      | 122.9(7) | H(21A)-C(21)-H(21C) | 109.5     |
| C(6)-C(7)-H(7)      | 118.5    | H(21B)-C(21)-H(21C) | 109.5     |
| C(2)-C(7)-H(7)      | 118.5    | C(20)-C(22)-C(12)   | 127.1(8)  |
| C(1)-C(8)-C(9)      | 125.1(8) | C(20)-C(22)-C(8)    | 128.1(8)  |
| C(1)-C(8)-C(22)     | 127.3(8) | C(12)-C(22)-C(8)    | 104.7(7)  |
| C(9)-C(8)-C(22)     | 106.8(7) | C(38)-C(31)-C(32)   | 127.7(9)  |
| C(10)-C(9)-C(8)     | 110.1(8) | C(38)-C(31)-H(31)   | 116.2     |
| C(10)-C(9)-H(9)     | 124.9    | C(32)-C(31)-H(31)   | 116.2     |
| C(8)-C(9)-H(9)      | 124.9    | C(33)-C(32)-C(37)   | 117.5(9)  |
| C(9)-C(10)-C(12)    | 109.7(8) | C(33)-C(32)-C(31)   | 117.8(9)  |
| C(9)-C(10)-C(11)    | 126.6(8) | C(37)-C(32)-C(31)   | 124.6(8)  |
| C(12)-C(10)-C(11)   | 123.7(8) | C(34)-C(33)-C(32)   | 121.6(9)  |
| C(10)-C(11)-H(11A)  | 109.5    | C(34)-C(33)-H(33)   | 119.2     |
| C(10)-C(11)-H(11B)  | 109.5    | C(32)-C(33)-H(33)   | 119.2     |
| H(11A)-C(11)-H(11B) | 109.5    | C(35)-C(34)-C(33)   | 118.4(8)  |
| C(10)-C(11)-H(11C)  | 109.5    | C(35)-C(34)-H(34)   | 120.8     |
| H(11A)-C(11)-H(11C) | 109.5    | C(33)-C(34)-H(34)   | 120.8     |
| H(11B)-C(11)-H(11C) | 109.5    | C(34)-C(35)-C(36)   | 122.1(9)  |
| C(13)-C(12)-C(22)   | 129.9(8) | C(34)-C(35)-Br(2)   | 118.5(7)  |
| C(13)-C(12)-C(10)   | 121.5(7) | C(36)-C(35)-Br(2)   | 119.4(7)  |
| C(22)-C(12)-C(10)   | 108.5(8) | C(37)-C(36)-C(35)   | 118.9(9)  |
| C(14)-C(13)-C(12)   | 130.8(8) | C(37)-C(36)-H(36)   | 120.6     |
| C(14)-C(13)-H(13)   | 114.6    | C(35)-C(36)-H(36)   | 120.6     |
| C(12)-C(13)-H(13)   | 114.6    | C(36)-C(37)-C(32)   | 121.4(8)  |
| C(13)-C(14)-C(18)   | 123.6(8) | C(36)-C(37)-H(37)   | 119.3     |
| C(13)-C(14)-C(15)   | 120.2(7) | C(32)-C(37)-H(37)   | 119.3     |
| C(18)-C(14)-C(15)   | 116.2(8) | C(31)-C(38)-C(52)   | 126.0(10) |
| C(16)-C(15)-C(14)   | 114.5(8) | C(31)-C(38)-C(39)   | 127.2(9)  |
| C(16)-C(15)-C(17)   | 110.2(7) | C(52)-C(38)-C(39)   | 106.5(8)  |
| C(14)-C(15)-C(17)   | 109.1(7) | C(40)-C(39)-C(49)   | 126.3(10) |
| C(16)-C(15)-H(15)   | 107.6    | C(40)-C(39)-C(38)   | 128.6(9)  |
| C(14)-C(15)-H(15)   | 107.6    | C(49)-C(39)-C(38)   | 105.1(8)  |
| C(17)-C(15)-H(15)   | 107.6    | C(42)-C(40)-C(39)   | 124.3(10) |
| C(15)-C(16)-H(16A)  | 109.5    | C(42)-C(40)-C(41)   | 114.1(10) |
| C(15)-C(16)-H(16B)  | 109.5    | C(39)-C(40)-C(41)   | 121.6(10) |
| H(16A)-C(16)-H(16B) | 109.5    | C(40)-C(41)-H(41A)  | 109.5     |
| C(15)-C(16)-H(16C)  | 109.5    | C(40)-C(41)-H(41B)  | 109.5     |
| H(16A)-C(16)-H(16C) | 109.5    | H(41A)-C(41)-H(41B) | 109.5     |
| H(16B)-C(16)-H(16C) | 109.5    | C(40)-C(41)-H(41C)  | 109.5     |
| C(15)-C(17)-H(17A)  | 109.5    | H(41A)-C(41)-H(41C) | 109.5     |

|                     |           |                     |           |
|---------------------|-----------|---------------------|-----------|
| H(41B)-C(41)-H(41C) | 109.5     | C(66)-C(65)-Br(3)   | 118.9(8)  |
| C(43)-C(42)-C(40)   | 134.1(11) | C(67)-C(66)-C(65)   | 118.6(9)  |
| C(43)-C(42)-H(42)   | 112.9     | C(67)-C(66)-H(66)   | 120.7     |
| C(40)-C(42)-H(42)   | 112.9     | C(65)-C(66)-H(66)   | 120.7     |
| C(42)-C(43)-C(44)   | 129.9(11) | C(66)-C(67)-C(62)   | 121.5(8)  |
| C(42)-C(43)-H(43)   | 115.1     | C(66)-C(67)-H(67)   | 119.2     |
| C(44)-C(43)-H(43)   | 115.1     | C(62)-C(67)-H(67)   | 119.2     |
| C(48)-C(44)-C(43)   | 124.1(10) | C(61)-C(68)-C(82)   | 127.2(9)  |
| C(48)-C(44)-C(45)   | 117.7(10) | C(61)-C(68)-C(69)   | 126.6(8)  |
| C(43)-C(44)-C(45)   | 118.1(10) | C(82)-C(68)-C(69)   | 105.4(7)  |
| C(46)-C(45)-C(47)   | 117.5(14) | C(70)-C(69)-C(79)   | 125.7(9)  |
| C(46)-C(45)-C(44)   | 113.9(12) | C(70)-C(69)-C(68)   | 127.9(8)  |
| C(47)-C(45)-C(44)   | 111.5(10) | C(79)-C(69)-C(68)   | 106.1(7)  |
| C(46)-C(45)-H(45)   | 104.0     | C(69)-C(70)-C(72)   | 124.9(8)  |
| C(47)-C(45)-H(45)   | 104.0     | C(69)-C(70)-C(71)   | 121.8(9)  |
| C(44)-C(45)-H(45)   | 104.0     | C(72)-C(70)-C(71)   | 113.3(8)  |
| C(45)-C(46)-H(46A)  | 109.5     | C(70)-C(71)-H(71A)  | 109.5     |
| C(45)-C(46)-H(46B)  | 109.5     | C(70)-C(71)-H(71B)  | 109.5     |
| H(46A)-C(46)-H(46B) | 109.5     | H(71A)-C(71)-H(71B) | 109.5     |
| C(45)-C(46)-H(46C)  | 109.5     | C(70)-C(71)-H(71C)  | 109.5     |
| H(46A)-C(46)-H(46C) | 109.5     | H(71A)-C(71)-H(71C) | 109.5     |
| H(46B)-C(46)-H(46C) | 109.5     | H(71B)-C(71)-H(71C) | 109.5     |
| C(45)-C(47)-H(47A)  | 109.5     | C(73)-C(72)-C(70)   | 131.8(9)  |
| C(45)-C(47)-H(47B)  | 109.5     | C(73)-C(72)-H(72)   | 114.1     |
| H(47A)-C(47)-H(47B) | 109.5     | C(70)-C(72)-H(72)   | 114.1     |
| C(45)-C(47)-H(47C)  | 109.5     | C(72)-C(73)-C(74)   | 131.0(10) |
| H(47A)-C(47)-H(47C) | 109.5     | C(72)-C(73)-H(73)   | 114.5     |
| H(47B)-C(47)-H(47C) | 109.5     | C(74)-C(73)-H(73)   | 114.5     |
| C(44)-C(48)-C(49)   | 131.2(10) | C(78)-C(74)-C(73)   | 123.1(9)  |
| C(44)-C(48)-H(48)   | 114.4     | C(78)-C(74)-C(75)   | 121.4(8)  |
| C(49)-C(48)-H(48)   | 114.4     | C(73)-C(74)-C(75)   | 115.4(9)  |
| C(48)-C(49)-C(50)   | 121.5(9)  | C(76)-C(75)-C(74)   | 114.8(8)  |
| C(48)-C(49)-C(39)   | 129.8(10) | C(76)-C(75)-C(77)   | 111.6(9)  |
| C(50)-C(49)-C(39)   | 108.7(9)  | C(74)-C(75)-C(77)   | 106.6(8)  |
| C(52)-C(50)-C(49)   | 108.7(9)  | C(76)-C(75)-H(75)   | 107.9     |
| C(52)-C(50)-C(51)   | 126.4(10) | C(74)-C(75)-H(75)   | 107.9     |
| C(49)-C(50)-C(51)   | 124.9(10) | C(77)-C(75)-H(75)   | 107.9     |
| C(50)-C(51)-H(51A)  | 109.5     | C(75)-C(76)-H(76A)  | 109.5     |
| C(50)-C(51)-H(51B)  | 109.5     | C(75)-C(76)-H(76B)  | 109.5     |
| H(51A)-C(51)-H(51B) | 109.5     | H(76A)-C(76)-H(76B) | 109.5     |
| C(50)-C(51)-H(51C)  | 109.5     | C(75)-C(76)-H(76C)  | 109.5     |
| H(51A)-C(51)-H(51C) | 109.5     | H(76A)-C(76)-H(76C) | 109.5     |
| H(51B)-C(51)-H(51C) | 109.5     | H(76B)-C(76)-H(76C) | 109.5     |
| C(50)-C(52)-C(38)   | 111.0(10) | C(75)-C(77)-H(77A)  | 109.5     |
| C(50)-C(52)-H(52)   | 124.5     | C(75)-C(77)-H(77B)  | 109.5     |
| C(38)-C(52)-H(52)   | 124.5     | H(77A)-C(77)-H(77B) | 109.5     |
| C(68)-C(61)-C(62)   | 127.6(8)  | C(75)-C(77)-H(77C)  | 109.5     |
| C(68)-C(61)-H(61)   | 116.2     | H(77A)-C(77)-H(77C) | 109.5     |
| C(62)-C(61)-H(61)   | 116.2     | H(77B)-C(77)-H(77C) | 109.5     |
| C(67)-C(62)-C(63)   | 117.6(9)  | C(74)-C(78)-C(79)   | 131.5(8)  |
| C(67)-C(62)-C(61)   | 124.1(8)  | C(74)-C(78)-H(78)   | 114.3     |
| C(63)-C(62)-C(61)   | 118.2(8)  | C(79)-C(78)-H(78)   | 114.3     |
| C(64)-C(63)-C(62)   | 121.6(9)  | C(78)-C(79)-C(80)   | 122.1(7)  |
| C(64)-C(63)-H(63)   | 119.2     | C(78)-C(79)-C(69)   | 129.7(8)  |
| C(62)-C(63)-H(63)   | 119.2     | C(80)-C(79)-C(69)   | 108.2(7)  |
| C(63)-C(64)-C(65)   | 118.1(8)  | C(82)-C(80)-C(79)   | 109.0(7)  |
| C(63)-C(64)-H(64)   | 120.9     | C(82)-C(80)-C(81)   | 126.7(8)  |
| C(65)-C(64)-H(64)   | 120.9     | C(79)-C(80)-C(81)   | 124.3(8)  |
| C(64)-C(65)-C(66)   | 122.5(9)  | C(80)-C(81)-H(81A)  | 109.5     |
| C(64)-C(65)-Br(3)   | 118.5(6)  | C(80)-C(81)-H(81B)  | 109.5     |

|                     |           |                    |           |
|---------------------|-----------|--------------------|-----------|
| H(81A)-C(81)-H(81B) | 109.5     | F(11)-P(2)-F(10)   | 90(2)     |
| C(80)-C(81)-H(81C)  | 109.5     | F(7)-P(2)-F(10)    | 89.9(10)  |
| H(81A)-C(81)-H(81C) | 109.5     | F(8)-P(2)-F(12)    | 75.7(11)  |
| H(81B)-C(81)-H(81C) | 109.5     | F(11)-P(2)-F(12)   | 84.3(16)  |
| C(80)-C(82)-C(68)   | 111.3(8)  | F(7)-P(2)-F(12)    | 108.2(11) |
| C(80)-C(82)-H(82)   | 124.4     | F(10)-P(2)-F(12)   | 161.2(15) |
| C(68)-C(82)-H(82)   | 124.4     | F(8)-P(2)-F(9)     | 76.1(10)  |
| F(3)-P(1)-F(4)      | 91.7(6)   | F(11)-P(2)-F(9)    | 165.6(17) |
| F(3)-P(1)-F(5)      | 177.8(6)  | F(7)-P(2)-F(9)     | 103.0(9)  |
| F(4)-P(1)-F(5)      | 90.1(5)   | F(10)-P(2)-F(9)    | 92(2)     |
| F(3)-P(1)-F(6)      | 88.3(6)   | F(12)-P(2)-F(9)    | 88.7(13)  |
| F(4)-P(1)-F(6)      | 177.1(5)  | F(16)-P(3)-F(17)   | 100.7(18) |
| F(5)-P(1)-F(6)      | 89.8(5)   | F(18A)-P(3)-F(17A) | 95.9(11)  |
| F(3)-P(1)-F(2)      | 91.3(5)   | F(16)-P(3)-F(13)   | 89.8(12)  |
| F(4)-P(1)-F(2)      | 92.0(4)   | F(18A)-P(3)-F(13)  | 94.5(7)   |
| F(5)-P(1)-F(2)      | 89.8(5)   | F(17)-P(3)-F(13)   | 79.5(11)  |
| F(6)-P(1)-F(2)      | 90.9(4)   | F(17A)-P(3)-F(13)  | 95.8(7)   |
| F(3)-P(1)-F(1)      | 89.5(5)   | F(16)-P(3)-F(14)   | 90.1(12)  |
| F(4)-P(1)-F(1)      | 88.6(4)   | F(18A)-P(3)-F(14)  | 85.7(7)   |
| F(5)-P(1)-F(1)      | 89.4(4)   | F(17)-P(3)-F(14)   | 100.4(11) |
| F(6)-P(1)-F(1)      | 88.5(4)   | F(17A)-P(3)-F(14)  | 84.1(7)   |
| F(2)-P(1)-F(1)      | 179.0(4)  | F(13)-P(3)-F(14)   | 179.8(5)  |
| F(11A)-P(2)-F(8)    | 87.1(7)   | F(18A)-P(3)-F(15A) | 89.6(12)  |
| F(8)-P(2)-F(11)     | 89.9(17)  | F(17A)-P(3)-F(15A) | 170.4(10) |
| F(11A)-P(2)-F(10A)  | 92.1(10)  | F(13)-P(3)-F(15A)  | 91.5(8)   |
| F(8)-P(2)-F(10A)    | 96.3(10)  | F(14)-P(3)-F(15A)  | 88.5(8)   |
| F(11A)-P(2)-F(12A)  | 85.4(11)  | F(18A)-P(3)-F(16A) | 172.3(8)  |
| F(8)-P(2)-F(12A)    | 98.7(9)   | F(17A)-P(3)-F(16A) | 86.7(9)   |
| F(10A)-P(2)-F(12A)  | 164.7(12) | F(13)-P(3)-F(16A)  | 92.5(5)   |
| F(11A)-P(2)-F(7)    | 91.4(8)   | F(14)-P(3)-F(16A)  | 87.3(6)   |
| F(8)-P(2)-F(7)      | 176.0(6)  | F(15A)-P(3)-F(16A) | 86.9(11)  |
| F(11)-P(2)-F(7)     | 91.2(16)  | F(16)-P(3)-F(15)   | 90.4(17)  |
| F(10A)-P(2)-F(7)    | 80.0(9)   | F(17)-P(3)-F(15)   | 161(2)    |
| F(12A)-P(2)-F(7)    | 84.9(8)   | F(13)-P(3)-F(15)   | 85.4(14)  |
| F(11A)-P(2)-F(9A)   | 167.4(9)  | F(14)-P(3)-F(15)   | 94.7(14)  |
| F(8)-P(2)-F(9A)     | 104.9(7)  | F(16)-P(3)-F(18)   | 166.8(15) |
| F(10A)-P(2)-F(9A)   | 90.6(9)   | F(17)-P(3)-F(18)   | 88.1(13)  |
| F(12A)-P(2)-F(9A)   | 88.7(8)   | F(13)-P(3)-F(18)   | 82.1(6)   |
| F(7)-P(2)-F(9A)     | 76.9(7)   | F(14)-P(3)-F(18)   | 98.1(6)   |
| F(8)-P(2)-F(10)     | 86.2(10)  | F(15)-P(3)-F(18)   | 78.7(14)  |

---

Symmetry transformations used to generate equivalent atoms:

**Table S12:** Anisotropic displacement parameters ( $\text{\AA}^2 \times 10^3$ ) for **26**. The anisotropic displacement factor exponent takes the form:  $-2\pi^2 [ h^2 a^{*2} U^{11} + \dots + 2 h k a^* b^* U^{12} ]$

|       | U <sup>11</sup> | U <sup>22</sup> | U <sup>33</sup> | U <sup>23</sup> | U <sup>13</sup> | U <sup>12</sup> |
|-------|-----------------|-----------------|-----------------|-----------------|-----------------|-----------------|
| Br(1) | 44(1)           | 58(1)           | 50(1)           | 15(1)           | 2(1)            | 4(1)            |
| C(1)  | 28(4)           | 53(6)           | 38(4)           | -10(4)          | -2(3)           | -4(4)           |
| C(2)  | 27(4)           | 51(5)           | 30(4)           | -3(4)           | 3(3)            | 0(4)            |
| C(3)  | 29(4)           | 49(5)           | 33(4)           | -3(4)           | -1(4)           | -2(4)           |
| C(4)  | 32(4)           | 67(6)           | 26(4)           | 4(4)            | -1(3)           | -3(4)           |
| C(5)  | 29(4)           | 53(5)           | 30(4)           | 8(4)            | -1(3)           | 3(4)            |
| C(6)  | 27(4)           | 51(5)           | 38(4)           | -1(4)           | 6(3)            | -3(4)           |
| C(7)  | 27(4)           | 59(6)           | 23(4)           | -2(3)           | -2(3)           | -2(4)           |
| C(8)  | 22(4)           | 50(5)           | 43(5)           | -5(4)           | 0(3)            | 2(4)            |
| C(9)  | 32(4)           | 49(5)           | 41(5)           | -3(4)           | 1(4)            | -2(4)           |
| C(10) | 38(4)           | 47(5)           | 35(4)           | 0(4)            | -6(4)           | 2(4)            |
| C(11) | 69(7)           | 40(5)           | 54(6)           | -8(4)           | 7(5)            | 3(5)            |
| C(12) | 29(4)           | 49(5)           | 36(4)           | -6(4)           | -4(4)           | 2(4)            |
| C(13) | 26(4)           | 47(5)           | 38(4)           | -5(4)           | -4(3)           | -4(4)           |
| C(14) | 23(4)           | 40(5)           | 43(4)           | -6(4)           | -8(3)           | 2(3)            |
| C(15) | 38(4)           | 42(5)           | 48(5)           | 1(4)            | -4(4)           | -1(4)           |
| C(16) | 45(5)           | 60(7)           | 59(6)           | 12(5)           | -1(4)           | -3(5)           |
| C(17) | 41(5)           | 43(5)           | 67(6)           | 9(5)            | -4(5)           | 4(4)            |
| C(18) | 38(4)           | 40(5)           | 59(5)           | -4(4)           | -12(4)          | -2(4)           |
| C(19) | 35(4)           | 49(6)           | 42(5)           | -14(4)          | -4(4)           | 3(4)            |
| C(20) | 28(4)           | 43(5)           | 36(4)           | -6(3)           | -8(3)           | 5(4)            |
| C(21) | 38(5)           | 49(6)           | 46(5)           | -4(4)           | 0(4)            | 6(4)            |
| C(22) | 21(4)           | 48(5)           | 37(4)           | -6(4)           | -9(3)           | 1(3)            |
| Br(2) | 45(1)           | 78(1)           | 53(1)           | -14(1)          | 1(1)            | -7(1)           |
| C(31) | 37(5)           | 68(7)           | 49(5)           | 8(5)            | 4(4)            | 12(5)           |
| C(32) | 35(4)           | 64(6)           | 40(5)           | 4(4)            | 8(4)            | 6(5)            |
| C(33) | 37(5)           | 74(7)           | 41(5)           | 8(5)            | -6(4)           | 9(5)            |
| C(34) | 37(4)           | 83(7)           | 34(5)           | -1(5)           | -1(4)           | 3(5)            |
| C(35) | 29(4)           | 62(6)           | 36(4)           | 0(4)            | -3(3)           | 3(4)            |
| C(36) | 34(4)           | 61(6)           | 44(5)           | 0(4)            | 1(4)            | 7(5)            |
| C(37) | 26(4)           | 79(7)           | 26(4)           | -7(4)           | -1(3)           | 3(4)            |
| C(38) | 31(4)           | 63(6)           | 41(5)           | -5(4)           | 5(4)            | 1(4)            |
| C(39) | 31(4)           | 61(6)           | 50(5)           | 5(4)            | -4(4)           | 9(4)            |
| C(40) | 27(4)           | 74(7)           | 65(6)           | 9(5)            | 6(4)            | -6(5)           |
| C(41) | 80(9)           | 104(11)         | 58(7)           | 14(7)           | 18(6)           | -31(8)          |
| C(42) | 51(6)           | 61(7)           | 61(6)           | 10(5)           | 3(5)            | -7(5)           |
| C(43) | 46(5)           | 66(7)           | 84(7)           | -4(6)           | -2(5)           | 8(6)            |
| C(44) | 58(6)           | 58(7)           | 60(6)           | -9(5)           | -14(5)          | 20(5)           |
| C(45) | 112(12)         | 65(8)           | 77(8)           | -14(6)          | -7(8)           | 13(8)           |
| C(46) | 90(12)          | 320(30)         | 164(16)         | -174(19)        | -75(12)         | 109(16)         |
| C(47) | 55(6)           | 69(8)           | 91(8)           | -29(6)          | 1(6)            | 7(6)            |
| C(48) | 47(6)           | 63(7)           | 50(5)           | -3(5)           | -8(4)           | 17(5)           |
| C(49) | 36(5)           | 64(6)           | 50(5)           | -3(5)           | -5(4)           | 5(5)            |
| C(50) | 48(5)           | 63(6)           | 45(5)           | 3(5)            | -4(5)           | 16(5)           |
| C(51) | 88(9)           | 70(8)           | 51(6)           | 4(5)            | 12(6)           | 12(7)           |
| C(52) | 49(6)           | 69(7)           | 47(5)           | -1(5)           | 11(5)           | 0(5)            |
| Br(3) | 58(1)           | 66(1)           | 53(1)           | -11(1)          | 6(1)            | -5(1)           |
| C(61) | 29(4)           | 68(6)           | 38(4)           | 10(4)           | -7(4)           | 5(4)            |
| C(62) | 33(4)           | 60(6)           | 29(4)           | -5(4)           | 5(3)            | 1(4)            |
| C(63) | 38(5)           | 74(7)           | 33(4)           | 3(4)            | -2(3)           | 4(5)            |
| C(64) | 38(4)           | 72(6)           | 27(4)           | -7(4)           | 1(4)            | -1(4)           |
| C(65) | 34(5)           | 74(7)           | 30(4)           | -3(4)           | 8(3)            | 1(4)            |
| C(66) | 34(4)           | 60(6)           | 40(5)           | 4(4)            | -2(4)           | 7(4)            |
| C(67) | 28(4)           | 68(6)           | 38(4)           | 5(4)            | -3(4)           | 5(4)            |
| C(68) | 25(4)           | 55(5)           | 38(4)           | 3(4)            | -6(4)           | -3(4)           |



|        |         |         |         |          |         |         |
|--------|---------|---------|---------|----------|---------|---------|
| C(69)  | 25(4)   | 54(6)   | 39(4)   | 10(4)    | -5(3)   | -5(4)   |
| C(70)  | 31(4)   | 62(6)   | 39(4)   | 13(4)    | -16(4)  | -2(4)   |
| C(71)  | 51(6)   | 73(7)   | 51(5)   | 20(5)    | 6(4)    | -11(5)  |
| C(72)  | 43(5)   | 53(6)   | 54(5)   | 17(5)    | -10(4)  | -8(5)   |
| C(73)  | 48(5)   | 52(6)   | 57(6)   | 11(5)    | -17(5)  | 0(5)    |
| C(74)  | 27(4)   | 48(5)   | 50(5)   | -3(4)    | -10(3)  | 5(4)    |
| C(75)  | 42(5)   | 46(6)   | 69(6)   | -6(5)    | -7(5)   | 1(4)    |
| C(76)  | 57(6)   | 62(7)   | 59(6)   | -13(5)   | -1(5)   | 17(5)   |
| C(77)  | 57(6)   | 68(7)   | 64(6)   | -27(5)   | -7(5)   | 3(6)    |
| C(78)  | 26(4)   | 49(5)   | 37(4)   | 0(4)     | -6(3)   | 0(4)    |
| C(79)  | 23(3)   | 48(5)   | 38(4)   | 0(4)     | -5(3)   | -4(3)   |
| C(80)  | 31(4)   | 50(5)   | 30(4)   | 0(4)     | -4(4)   | -3(4)   |
| C(81)  | 64(6)   | 50(6)   | 32(4)   | 5(4)     | 6(4)    | -2(5)   |
| C(82)  | 33(4)   | 46(5)   | 38(4)   | 0(4)     | 9(3)    | -2(4)   |
| P(1)   | 48(1)   | 70(2)   | 39(1)   | -5(1)    | 7(1)    | 3(1)    |
| F(1)   | 58(3)   | 79(4)   | 69(4)   | -12(3)   | 0(3)    | -3(3)   |
| F(2)   | 79(5)   | 98(6)   | 88(5)   | -35(4)   | -4(4)   | -5(4)   |
| F(3)   | 214(12) | 133(8)  | 61(4)   | -5(5)    | -60(6)  | 47(8)   |
| F(4)   | 107(6)  | 94(6)   | 157(7)  | -33(5)   | 88(6)   | -12(5)  |
| F(5)   | 111(6)  | 105(6)  | 114(6)  | 51(5)    | -37(5)  | -29(5)  |
| F(6)   | 53(4)   | 164(8)  | 114(6)  | -69(6)   | 27(4)   | -22(5)  |
| P(2)   | 71(2)   | 67(2)   | 41(1)   | -4(1)    | -1(1)   | 11(2)   |
| F(7)   | 123(7)  | 160(9)  | 97(6)   | 62(6)    | 16(6)   | 31(7)   |
| F(8)   | 209(12) | 67(5)   | 127(7)  | -2(5)    | -26(8)  | 24(6)   |
| F(9)   | 66(13)  | 97(16)  | 190(30) | -38(17)  | -45(17) | -8(11)  |
| F(10)  | 260(50) | 140(30) | 71(16)  | 22(16)   | 90(20)  | 110(30) |
| F(11)  | 100(20) | 150(30) | 310(50) | -110(30) | 60(30)  | -51(19) |
| F(12)  | 140(20) | 125(19) | 140(20) | -60(16)  | 110(18) | -5(17)  |
| F(9A)  | 82(10)  | 126(13) | 57(7)   | -31(7)   | 1(6)    | -18(9)  |
| F(10A) | 81(10)  | 230(20) | 73(10)  | -3(12)   | 42(8)   | -28(12) |
| F(11A) | 134(16) | 103(11) | 46(7)   | -21(7)   | -17(9)  | -6(13)  |
| F(12A) | 52(8)   | 210(20) | 126(13) | -49(14)  | -23(8)  | 51(10)  |
| P(3)   | 55(2)   | 66(2)   | 39(1)   | -12(1)   | -6(1)   | 9(1)    |
| F(13)  | 90(5)   | 68(5)   | 110(5)  | -23(4)   | 37(4)   | 3(4)    |
| F(14)  | 104(6)  | 121(7)  | 83(5)   | -49(5)   | 0(5)    | 35(5)   |
| F(15)  | 75(18)  | 200(40) | 110(20) | 30(20)   | -10(16) | 10(20)  |
| F(16)  | 90(20)  | 43(13)  | 200(40) | -16(17)  | 10(20)  | -32(14) |
| F(17)  | 81(17)  | 190(30) | 32(10)  | 5(12)    | -3(9)   | 14(18)  |
| F(18)  | 60(11)  | 55(11)  | 79(14)  | -11(9)   | 36(10)  | -4(8)   |
| F(15A) | 62(9)   | 150(20) | 200(30) | -58(17)  | -62(14) | 21(11)  |
| F(16A) | 138(16) | 62(8)   | 79(9)   | 8(6)     | 26(9)   | -4(9)   |
| F(17A) | 56(8)   | 121(12) | 117(14) | -36(10)  | -30(8)  | -5(8)   |
| F(18A) | 190(20) | 79(10)  | 65(9)   | 20(7)    | 21(13)  | 9(13)   |

---

**Table S13:** Hydrogen coordinates ( $\times 10^4$ ) and isotropic displacement parameters ( $\text{\AA}^2 \times 10^{-3}$ ) for **26**.

|        | x     | y    | z    | U(eq) |
|--------|-------|------|------|-------|
| H(1)   | 9239  | 2853 | 5447 | 48    |
| H(3)   | 10535 | 2239 | 5927 | 44    |
| H(4)   | 10815 | 1417 | 6145 | 50    |
| H(6)   | 8508  | 950  | 5069 | 46    |
| H(7)   | 8164  | 1769 | 4864 | 43    |
| H(9)   | 9762  | 2157 | 4437 | 49    |
| H(11A) | 9733  | 2821 | 3491 | 81    |
| H(11B) | 10410 | 2294 | 3662 | 81    |
| H(11C) | 11746 | 2755 | 3630 | 81    |
| H(13)  | 10485 | 3624 | 3705 | 44    |
| H(15)  | 11417 | 4858 | 3816 | 51    |
| H(16A) | 11033 | 4113 | 3188 | 82    |
| H(16B) | 12782 | 4165 | 3464 | 82    |
| H(16C) | 12201 | 4609 | 3158 | 82    |
| H(17A) | 9270  | 5040 | 3303 | 76    |
| H(17B) | 8351  | 4965 | 3750 | 76    |
| H(17C) | 8264  | 4530 | 3407 | 76    |
| H(18)  | 10013 | 4797 | 4448 | 54    |
| H(19)  | 8970  | 4476 | 5018 | 50    |
| H(21A) | 7313  | 3394 | 5361 | 66    |
| H(21B) | 7358  | 3987 | 5417 | 66    |
| H(21C) | 8970  | 3655 | 5580 | 66    |
| H(31)  | 4594  | 7148 | 7115 | 61    |
| H(33)  | 6048  | 7709 | 7589 | 61    |
| H(34)  | 6642  | 8519 | 7819 | 61    |
| H(36)  | 4567  | 9063 | 6743 | 56    |
| H(37)  | 4058  | 8261 | 6507 | 52    |
| H(41A) | 2813  | 6040 | 7187 | 121   |
| H(41B) | 2705  | 6630 | 7116 | 121   |
| H(41C) | 4537  | 6377 | 7245 | 121   |
| H(42)  | 3488  | 5543 | 6704 | 69    |
| H(43)  | 3778  | 5191 | 6104 | 79    |
| H(45)  | 4968  | 5600 | 5108 | 102   |
| H(46A) | 2879  | 4989 | 4971 | 287   |
| H(46B) | 2286  | 5560 | 5006 | 287   |
| H(46C) | 1934  | 5186 | 5388 | 287   |
| H(47A) | 6843  | 5117 | 5449 | 107   |
| H(47B) | 5666  | 4756 | 5164 | 107   |
| H(47C) | 5301  | 4794 | 5657 | 107   |
| H(48)  | 4913  | 6322 | 5360 | 64    |
| H(51A) | 5845  | 7629 | 5321 | 105   |
| H(51B) | 4574  | 7193 | 5160 | 105   |
| H(51C) | 6617  | 7082 | 5242 | 105   |
| H(52)  | 5439  | 7792 | 6099 | 66    |
| H(61)  | 4940  | 6776 | 3744 | 54    |
| H(63)  | 5787  | 7398 | 4260 | 58    |
| H(64)  | 5447  | 8197 | 4527 | 55    |
| H(66)  | 3561  | 8659 | 3400 | 54    |
| H(67)  | 3745  | 7850 | 3146 | 54    |
| H(71A) | 3084  | 6215 | 3646 | 87    |
| H(71B) | 4741  | 5968 | 3877 | 87    |
| H(71C) | 3206  | 5622 | 3692 | 87    |
| H(72)  | 5123  | 5168 | 3332 | 60    |
| H(73)  | 6238  | 4869 | 2766 | 63    |

|        |      |      |      |    |
|--------|------|------|------|----|
| H(75)  | 7498 | 4817 | 2110 | 63 |
| H(76A) | 7978 | 5053 | 1433 | 89 |
| H(76B) | 8578 | 5517 | 1715 | 89 |
| H(76C) | 6722 | 5530 | 1477 | 89 |
| H(77A) | 4098 | 5089 | 1791 | 95 |
| H(77B) | 4460 | 4659 | 2128 | 95 |
| H(77C) | 5131 | 4595 | 1655 | 95 |
| H(78)  | 6377 | 6039 | 2008 | 45 |
| H(81A) | 7519 | 6884 | 1927 | 73 |
| H(81B) | 6341 | 7375 | 1984 | 73 |
| H(81C) | 5483 | 6877 | 1797 | 73 |
| H(82)  | 5416 | 7494 | 2744 | 47 |

---

**Table S14:** Torsion angles [°] for **26**.

|                         |           |                         |            |
|-------------------------|-----------|-------------------------|------------|
| C(8)-C(1)-C(2)-C(7)     | -30.4(14) | C(31)-C(32)-C(37)-C(36) | 179.2(9)   |
| C(8)-C(1)-C(2)-C(3)     | 150.1(8)  | C(32)-C(31)-C(38)-C(52) | 8.2(16)    |
| C(7)-C(2)-C(3)-C(4)     | 3.4(12)   | C(32)-C(31)-C(38)-C(39) | -179.0(9)  |
| C(1)-C(2)-C(3)-C(4)     | -177.1(8) | C(31)-C(38)-C(39)-C(40) | 7.4(16)    |
| C(2)-C(3)-C(4)-C(5)     | -0.3(12)  | C(52)-C(38)-C(39)-C(40) | -178.7(9)  |
| C(3)-C(4)-C(5)-C(6)     | -2.0(12)  | C(31)-C(38)-C(39)-C(49) | -172.8(9)  |
| C(3)-C(4)-C(5)-Br(1)    | 176.5(6)  | C(52)-C(38)-C(39)-C(49) | 1.1(10)    |
| C(4)-C(5)-C(6)-C(7)     | 1.1(12)   | C(49)-C(39)-C(40)-C(42) | 5.7(15)    |
| Br(1)-C(5)-C(6)-C(7)    | -177.5(6) | C(38)-C(39)-C(40)-C(42) | -174.6(9)  |
| C(5)-C(6)-C(7)-C(2)     | 2.3(12)   | C(49)-C(39)-C(40)-C(41) | -174.6(9)  |
| C(3)-C(2)-C(7)-C(6)     | -4.4(12)  | C(38)-C(39)-C(40)-C(41) | 5.1(15)    |
| C(1)-C(2)-C(7)-C(6)     | 176.1(8)  | C(39)-C(40)-C(42)-C(43) | -4.8(19)   |
| C(2)-C(1)-C(8)-C(9)     | -8.1(14)  | C(41)-C(40)-C(42)-C(43) | 175.5(12)  |
| C(2)-C(1)-C(8)-C(22)    | -176.7(8) | C(40)-C(42)-C(43)-C(44) | -1(2)      |
| C(1)-C(8)-C(9)-C(10)    | -167.8(8) | C(42)-C(43)-C(44)-C(48) | 4.2(19)    |
| C(22)-C(8)-C(9)-C(10)   | 2.8(10)   | C(42)-C(43)-C(44)-C(45) | -179.6(11) |
| C(8)-C(9)-C(10)-C(12)   | -0.5(10)  | C(48)-C(44)-C(45)-C(46) | -101.4(18) |
| C(8)-C(9)-C(10)-C(11)   | 178.1(9)  | C(43)-C(44)-C(45)-C(46) | 82.1(18)   |
| C(9)-C(10)-C(12)-C(13)  | 177.4(7)  | C(48)-C(44)-C(45)-C(47) | 122.7(12)  |
| C(11)-C(10)-C(12)-C(13) | -1.2(14)  | C(43)-C(44)-C(45)-C(47) | -53.7(16)  |
| C(9)-C(10)-C(12)-C(22)  | -2.0(10)  | C(43)-C(44)-C(48)-C(49) | -1.9(18)   |
| C(11)-C(10)-C(12)-C(22) | 179.3(8)  | C(45)-C(44)-C(48)-C(49) | -178.1(10) |
| C(22)-C(12)-C(13)-C(14) | 3.3(15)   | C(44)-C(48)-C(49)-C(50) | 178.7(10)  |
| C(10)-C(12)-C(13)-C(14) | -176.0(8) | C(44)-C(48)-C(49)-C(39) | -0.3(18)   |
| C(12)-C(13)-C(14)-C(18) | -3.6(14)  | C(40)-C(39)-C(49)-C(48) | -2.1(16)   |
| C(12)-C(13)-C(14)-C(15) | 178.8(8)  | C(38)-C(39)-C(49)-C(48) | 178.1(9)   |
| C(13)-C(14)-C(15)-C(16) | -23.7(11) | C(40)-C(39)-C(49)-C(50) | 178.7(9)   |
| C(18)-C(14)-C(15)-C(16) | 158.5(8)  | C(38)-C(39)-C(49)-C(50) | -1.1(10)   |
| C(13)-C(14)-C(15)-C(17) | 100.3(9)  | C(48)-C(49)-C(50)-C(52) | -178.6(9)  |
| C(18)-C(14)-C(15)-C(17) | -77.4(9)  | C(39)-C(49)-C(50)-C(52) | 0.6(11)    |
| C(13)-C(14)-C(18)-C(19) | -4.4(14)  | C(48)-C(49)-C(50)-C(51) | 1.3(15)    |
| C(15)-C(14)-C(18)-C(19) | 173.3(8)  | C(39)-C(49)-C(50)-C(51) | -179.5(9)  |
| C(14)-C(18)-C(19)-C(20) | 5.2(17)   | C(49)-C(50)-C(52)-C(38) | 0.2(12)    |
| C(18)-C(19)-C(20)-C(22) | 5.7(15)   | C(51)-C(50)-C(52)-C(38) | -179.8(10) |
| C(18)-C(19)-C(20)-C(21) | -173.2(9) | C(31)-C(38)-C(52)-C(50) | 173.2(9)   |
| C(19)-C(20)-C(22)-C(12) | -13.2(13) | C(39)-C(38)-C(52)-C(50) | -0.8(11)   |
| C(21)-C(20)-C(22)-C(12) | 165.7(8)  | C(68)-C(61)-C(62)-C(67) | 27.5(15)   |
| C(19)-C(20)-C(22)-C(8)  | 171.3(8)  | C(68)-C(61)-C(62)-C(63) | -157.3(9)  |
| C(21)-C(20)-C(22)-C(8)  | -9.8(13)  | C(67)-C(62)-C(63)-C(64) | -0.8(13)   |
| C(13)-C(12)-C(22)-C(20) | 7.8(14)   | C(61)-C(62)-C(63)-C(64) | -176.3(8)  |
| C(10)-C(12)-C(22)-C(20) | -172.8(8) | C(62)-C(63)-C(64)-C(65) | -1.5(13)   |
| C(13)-C(12)-C(22)-C(8)  | -175.8(8) | C(63)-C(64)-C(65)-C(66) | 2.0(13)    |
| C(10)-C(12)-C(22)-C(8)  | 3.6(9)    | C(63)-C(64)-C(65)-Br(3) | 179.7(7)   |
| C(1)-C(8)-C(22)-C(20)   | -17.2(13) | C(64)-C(65)-C(66)-C(67) | 0.0(13)    |
| C(9)-C(8)-C(22)-C(20)   | 172.5(8)  | Br(3)-C(65)-C(66)-C(67) | -177.7(7)  |
| C(1)-C(8)-C(22)-C(12)   | 166.5(8)  | C(65)-C(66)-C(67)-C(62) | -2.5(13)   |
| C(9)-C(8)-C(22)-C(12)   | -3.9(8)   | C(63)-C(62)-C(67)-C(66) | 2.9(13)    |
| C(38)-C(31)-C(32)-C(33) | -153.6(9) | C(61)-C(62)-C(67)-C(66) | 178.1(9)   |
| C(38)-C(31)-C(32)-C(37) | 29.8(15)  | C(62)-C(61)-C(68)-C(82) | 10.6(15)   |
| C(37)-C(32)-C(33)-C(34) | -3.6(14)  | C(62)-C(61)-C(68)-C(69) | 178.9(8)   |
| C(31)-C(32)-C(33)-C(34) | 179.5(9)  | C(61)-C(68)-C(69)-C(70) | 18.4(14)   |
| C(32)-C(33)-C(34)-C(35) | 2.3(14)   | C(82)-C(68)-C(69)-C(70) | -171.3(8)  |
| C(33)-C(34)-C(35)-C(36) | 0.1(13)   | C(61)-C(68)-C(69)-C(79) | -167.1(8)  |
| C(33)-C(34)-C(35)-Br(2) | -179.7(7) | C(82)-C(68)-C(69)-C(79) | 3.2(9)     |
| C(34)-C(35)-C(36)-C(37) | -1.1(13)  | C(79)-C(69)-C(70)-C(72) | 17.5(13)   |
| Br(2)-C(35)-C(36)-C(37) | 178.7(6)  | C(68)-C(69)-C(70)-C(72) | -169.0(8)  |
| C(35)-C(36)-C(37)-C(32) | -0.3(13)  | C(79)-C(69)-C(70)-C(71) | -164.5(8)  |
| C(33)-C(32)-C(37)-C(36) | 2.6(13)   | C(68)-C(69)-C(70)-C(71) | 9.0(13)    |

|                         |            |                         |           |
|-------------------------|------------|-------------------------|-----------|
| C(69)-C(70)-C(72)-C(73) | -11.5(15)  | C(70)-C(69)-C(79)-C(78) | -6.5(13)  |
| C(71)-C(70)-C(72)-C(73) | 170.4(10)  | C(68)-C(69)-C(79)-C(78) | 178.8(8)  |
| C(70)-C(72)-C(73)-C(74) | -4.6(18)   | C(70)-C(69)-C(79)-C(80) | 171.3(8)  |
| C(72)-C(73)-C(74)-C(78) | 7.6(16)    | C(68)-C(69)-C(79)-C(80) | -3.4(8)   |
| C(72)-C(73)-C(74)-C(75) | -168.4(10) | C(78)-C(79)-C(80)-C(82) | -179.7(7) |
| C(78)-C(74)-C(75)-C(76) | 21.3(12)   | C(69)-C(79)-C(80)-C(82) | 2.3(9)    |
| C(73)-C(74)-C(75)-C(76) | -162.6(8)  | C(78)-C(79)-C(80)-C(81) | -1.7(13)  |
| C(78)-C(74)-C(75)-C(77) | -102.8(10) | C(69)-C(79)-C(80)-C(81) | -179.7(8) |
| C(73)-C(74)-C(75)-C(77) | 73.3(10)   | C(79)-C(80)-C(82)-C(68) | -0.2(10)  |
| C(73)-C(74)-C(78)-C(79) | 3.2(14)    | C(81)-C(80)-C(82)-C(68) | -178.2(8) |
| C(75)-C(74)-C(78)-C(79) | 179.0(8)   | C(61)-C(68)-C(82)-C(80) | 168.3(9)  |
| C(74)-C(78)-C(79)-C(80) | 175.9(8)   | C(69)-C(68)-C(82)-C(80) | -1.9(10)  |
| C(74)-C(78)-C(79)-C(69) | -6.6(14)   |                         |           |

---

**Table S15:** Crystal data and structure refinement for **30**.

|                                   |                                             |                            |
|-----------------------------------|---------------------------------------------|----------------------------|
| CCDC code                         | #2129314                                    |                            |
| Empirical formula                 | $C_{128}H_{171}F_{24}N_4O_{9.50}P_4$        |                            |
| Formula weight                    | 2497.56                                     |                            |
| Temperature                       | 150.00(10) K                                |                            |
| Wavelength                        | 1.54184 Å                                   |                            |
| Crystal system                    | Triclinic                                   |                            |
| Space group                       | P-1                                         |                            |
| Unit cell dimensions              | a = 12.3599(10) Å                           | $\alpha = 75.138(5)^\circ$ |
|                                   | b = 12.9645(7) Å                            | $\beta = 74.245(6)^\circ$  |
|                                   | c = 20.9049(12) Å                           | $\gamma = 83.084(6)^\circ$ |
| Volume                            | 3111.5(4) Å <sup>3</sup>                    |                            |
| Z                                 | 1                                           |                            |
| Density (calculated)              | 1.333 Mg/m <sup>3</sup>                     |                            |
| Absorption coefficient            | 1.371 mm <sup>-1</sup>                      |                            |
| F(000)                            | 1319                                        |                            |
| Crystal size                      | 0.250 x 0.200 x 0.150 mm <sup>3</sup>       |                            |
| Theta range for data collection   | 4.521 to 68.847°                            |                            |
| Index ranges                      | -14<=h<=14, -15<=k<=15, -25<=l<=25          |                            |
| Reflections collected             | 20034                                       |                            |
| Independent reflections           | 20034 [R(int) = ?]                          |                            |
| Completeness to theta = 67.684°   | 99.6 %                                      |                            |
| Absorption correction             | Semi-empirical from equivalents             |                            |
| Max. and min. transmission        | 1.00000 and 0.90720                         |                            |
| Refinement method                 | Full-matrix least-squares on F <sup>2</sup> |                            |
| Data / restraints / parameters    | 20034 / 110 / 890                           |                            |
| Goodness-of-fit on F <sup>2</sup> | 1.034                                       |                            |
| Final R indices [I>2sigma(I)]     | R1 = 0.0807, wR2 = 0.2207                   |                            |
| R indices (all data)              | R1 = 0.1176, wR2 = 0.2420                   |                            |
| Extinction coefficient            | n/a                                         |                            |
| Largest diff. peak and hole       | 1.023 and -0.489 e.Å <sup>-3</sup>          |                            |

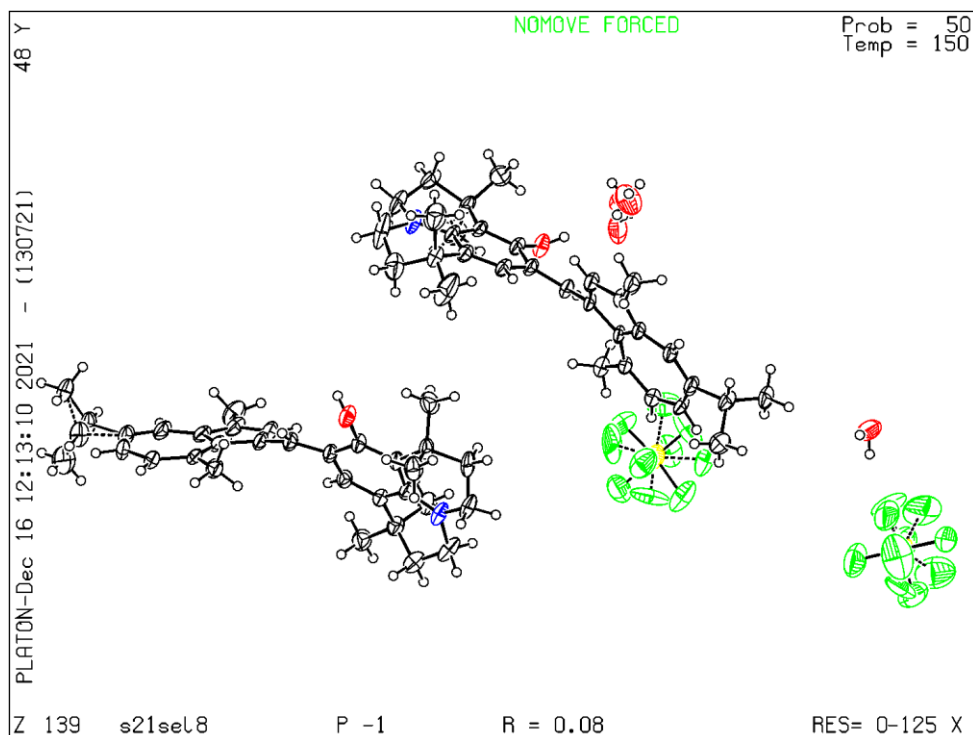

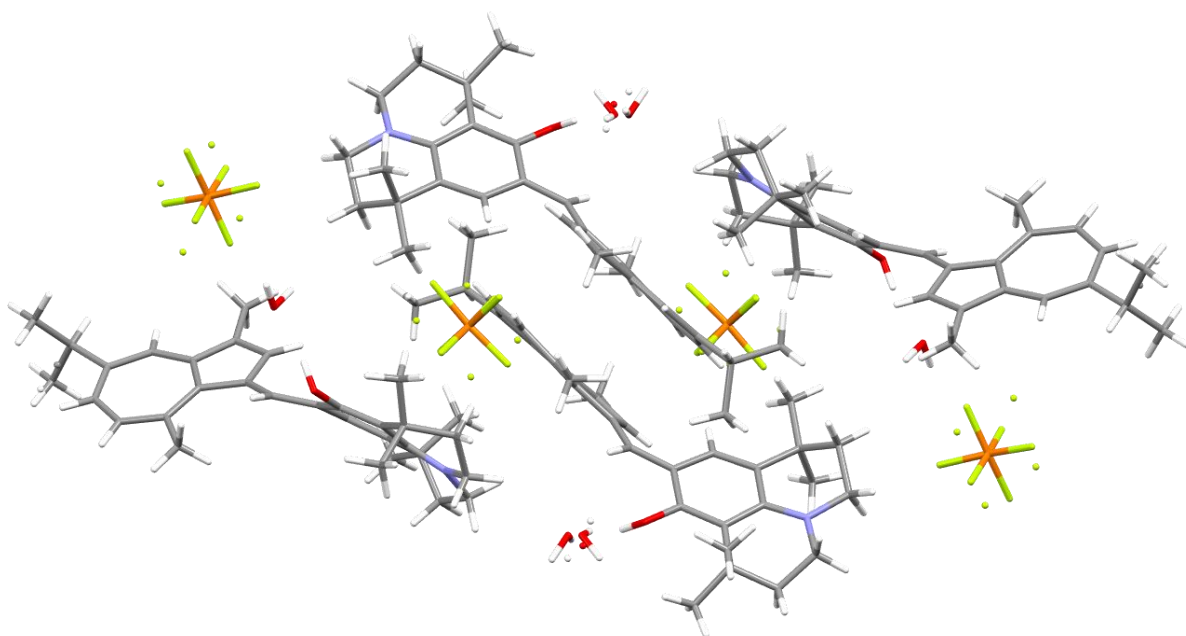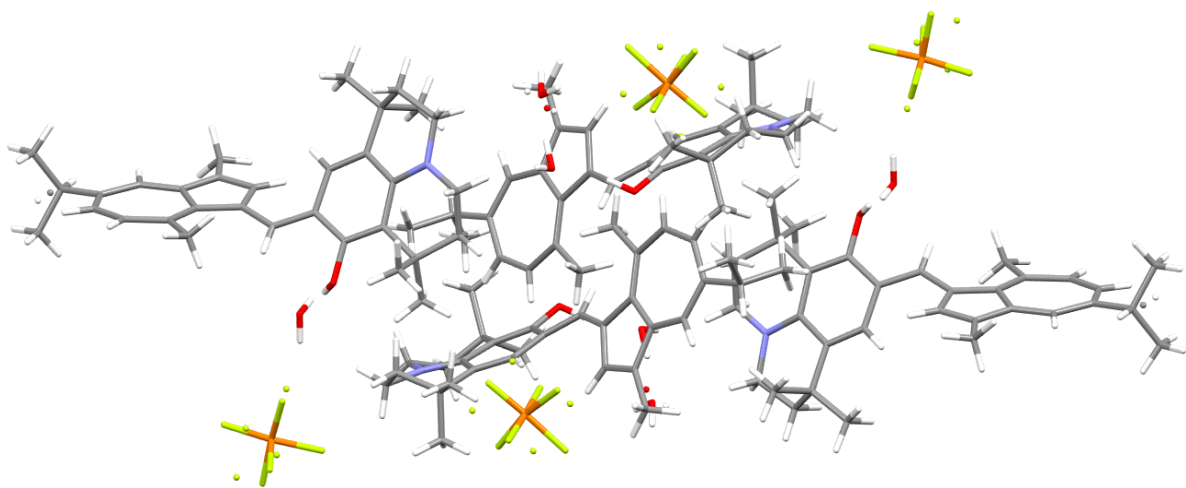

**Table S16:** Atomic coordinates ( $\times 10^4$ ) and equivalent isotropic displacement parameters ( $\text{\AA}^2 \times 10^3$ ) for **30**.  $U(\text{eq})$  is defined as one third of the trace of the orthogonalized  $U^{ij}$  tensor.

|       | x        | y       | z       | U(eq) |
|-------|----------|---------|---------|-------|
| N(1)  | 2714(3)  | 6359(3) | 8771(2) | 45(1) |
| O(1)  | 879(3)   | 5854(3) | 7169(1) | 45(1) |
| C(1)  | 2813(3)  | 6312(3) | 6114(2) | 34(1) |
| C(2)  | 2753(3)  | 6490(3) | 6751(2) | 33(1) |
| C(3)  | 1753(3)  | 6200(3) | 7301(2) | 33(1) |
| C(4)  | 1701(3)  | 6225(3) | 7966(2) | 32(1) |
| C(5)  | 602(4)   | 5976(3) | 8527(2) | 38(1) |
| C(6)  | 459(4)   | 4768(4) | 8742(2) | 47(1) |
| C(7)  | -428(4)  | 6558(5) | 8302(2) | 62(1) |
| C(8)  | 685(4)   | 6383(4) | 9135(2) | 47(1) |
| C(9)  | 1743(4)  | 6028(4) | 9343(2) | 50(1) |
| C(10) | 3741(5)  | 6444(6) | 8985(2) | 80(2) |
| C(11) | 4818(5)  | 6298(5) | 8422(3) | 68(1) |
| C(12) | 4703(4)  | 7076(3) | 7760(2) | 40(1) |
| C(13) | 4504(6)  | 8217(5) | 7845(3) | 70(2) |
| C(14) | 5789(5)  | 7022(8) | 7213(3) | 97(3) |
| C(15) | 3688(3)  | 6792(3) | 7576(2) | 35(1) |
| C(16) | 3670(3)  | 6824(3) | 6925(2) | 34(1) |
| C(17) | 2684(3)  | 6458(3) | 8123(2) | 34(1) |
| C(18) | 3558(3)  | 6769(3) | 5480(2) | 33(1) |
| C(19) | 3995(3)  | 7792(3) | 5319(2) | 38(1) |
| C(20) | 4543(4)  | 8100(3) | 4639(2) | 39(1) |
| C(21) | 5074(4)  | 9142(4) | 4285(2) | 50(1) |
| C(22) | 4515(3)  | 7247(3) | 4335(2) | 33(1) |
| C(23) | 4987(3)  | 7326(3) | 3641(2) | 40(1) |
| C(24) | 5066(4)  | 6595(3) | 3249(2) | 39(1) |
| C(25) | 5565(4)  | 6969(4) | 2478(2) | 48(1) |
| C(26) | 4705(4)  | 6935(4) | 2088(2) | 56(1) |
| C(27) | 6664(5)  | 6364(5) | 2239(2) | 62(1) |
| C(28) | 4748(4)  | 5551(4) | 3516(2) | 44(1) |
| C(29) | 4213(3)  | 5017(3) | 4173(2) | 39(1) |
| C(30) | 3784(3)  | 5359(3) | 4787(2) | 34(1) |
| C(31) | 3184(4)  | 4525(3) | 5378(2) | 39(1) |
| C(32) | 3894(3)  | 6378(3) | 4865(2) | 33(1) |
| N(2)  | 8655(3)  | 1854(3) | 6353(2) | 45(1) |
| O(2)  | 8790(3)  | 3897(2) | 7913(1) | 45(1) |
| C(41) | 8496(3)  | 2078(3) | 8967(2) | 34(1) |
| C(42) | 8296(3)  | 2076(3) | 8346(2) | 34(1) |
| C(43) | 8561(3)  | 2995(3) | 7782(2) | 34(1) |
| C(44) | 8611(3)  | 2971(3) | 7122(2) | 32(1) |
| C(45) | 8873(3)  | 3974(3) | 6533(2) | 38(1) |
| C(46) | 8187(4)  | 4970(4) | 6709(2) | 51(1) |
| C(47) | 10137(4) | 4157(4) | 6342(2) | 49(1) |
| C(48) | 8535(4)  | 3766(4) | 5926(2) | 51(1) |
| C(49) | 9003(4)  | 2739(4) | 5759(2) | 53(1) |
| C(50) | 8652(5)  | 815(4)  | 6184(2) | 57(1) |
| C(51) | 8590(5)  | -120(4) | 6792(2) | 53(1) |
| C(52) | 7686(4)  | 101(3)  | 7404(2) | 39(1) |
| C(53) | 6546(4)  | 370(4)  | 7226(2) | 47(1) |
| C(54) | 7597(5)  | -877(3) | 8000(2) | 51(1) |
| C(55) | 8026(3)  | 1089(3) | 7563(2) | 35(1) |
| C(56) | 7958(3)  | 1166(3) | 8202(2) | 33(1) |
| C(57) | 8439(3)  | 1986(3) | 6991(2) | 32(1) |
| C(58) | 8070(4)  | 1363(3) | 9609(2) | 35(1) |
| C(59) | 6985(4)  | 953(3)  | 9795(2) | 41(1) |



|        |          |          |           |         |
|--------|----------|----------|-----------|---------|
| C(60)  | 6707(4)  | 418(3)   | 10474(2)  | 43(1)   |
| C(61)  | 5590(5)  | -43(4)   | 10846(2)  | 59(1)   |
| C(62)  | 7615(4)  | 449(3)   | 10748(2)  | 39(1)   |
| C(63)  | 7581(4)  | 8(3)     | 11436(2)  | 47(1)   |
| C(64)  | 8353(5)  | -32(3)   | 11803(2)  | 47(1)   |
| C(65)  | 7934(12) | -486(5)  | 12585(3)  | 46(3)   |
| C(65A) | 8580(50) | -460(20) | 12532(13) | 45(10)  |
| C(66)  | 8027(5)  | 347(5)   | 12961(2)  | 65(1)   |
| C(67)  | 8550(7)  | -1530(5) | 12797(3)  | 90(2)   |
| C(68)  | 9428(5)  | 304(4)   | 11518(2)  | 54(1)   |
| C(69)  | 9986(4)  | 799(3)   | 10846(2)  | 46(1)   |
| C(70)  | 9599(4)  | 1170(3)  | 10243(2)  | 37(1)   |
| C(71)  | 10459(4) | 1728(3)  | 9629(2)   | 41(1)   |
| C(72)  | 8512(4)  | 1048(3)  | 10200(2)  | 35(1)   |
| P(1)   | 2253(1)  | 1571(1)  | 4729(1)   | 60(1)   |
| F(1)   | 3412(3)  | 2116(4)  | 4563(2)   | 87(1)   |
| F(2)   | 1084(3)  | 1034(3)  | 4866(2)   | 88(1)   |
| F(3)   | 1776(8)  | 1849(8)  | 5442(4)   | 119(3)  |
| F(4)   | 2747(5)  | 1049(6)  | 4089(3)   | 84(2)   |
| F(5)   | 1791(7)  | 2556(5)  | 4326(6)   | 115(4)  |
| F(6)   | 2728(5)  | 427(5)   | 5178(4)   | 82(2)   |
| F(3A)  | 1569(12) | 2871(11) | 4809(9)   | 90(5)   |
| F(4A)  | 2834(11) | 672(10)  | 4617(12)  | 109(7)  |
| F(5A)  | 2112(12) | 2062(14) | 3921(6)   | 80(5)   |
| F(6A)  | 2295(17) | 1460(20) | 5450(7)   | 124(8)  |
| P(2)   | 3736(2)  | 3047(1)  | 31(1)     | 65(1)   |
| F(7)   | 3467(5)  | 3755(4)  | -629(2)   | 132(2)  |
| F(8)   | 4180(5)  | 2412(3)  | 679(2)    | 107(2)  |
| F(9)   | 3112(8)  | 3821(7)  | 466(4)    | 123(3)  |
| F(10)  | 4242(10) | 2114(5)  | -332(3)   | 116(3)  |
| F(11)  | 4862(7)  | 3629(8)  | -250(4)   | 135(4)  |
| F(12)  | 2673(6)  | 2304(7)  | 374(4)    | 123(3)  |
| F(9A)  | 3960(30) | 4124(12) | 228(12)   | 133(9)  |
| F(10A) | 3340(20) | 2420(20) | -418(14)  | 141(9)  |
| F(11A) | 4900(18) | 2699(16) | -324(12)  | 122(7)  |
| F(12A) | 2281(17) | 3442(17) | 160(9)    | 131(9)  |
| O(3)   | 2761(5)  | 5719(3)  | 943(2)    | 78(1)   |
| O(4)   | 353(4)   | 7017(4)  | 6043(2)   | 80(1)   |
| O(5)   | 1298(10) | 8859(8)  | 5573(6)   | 81(4)   |
| O(6)   | 886(19)  | 8490(20) | 5812(12)  | 103(10) |

---

**Table S17:** Bond lengths [Å] for **30**.

|              |          |              |          |
|--------------|----------|--------------|----------|
| N(1)-C(17)   | 1.338(5) | C(24)-C(28)  | 1.386(6) |
| N(1)-C(9)    | 1.461(5) | C(24)-C(25)  | 1.532(5) |
| N(1)-C(10)   | 1.481(7) | C(25)-C(27)  | 1.511(7) |
| O(1)-C(3)    | 1.337(5) | C(25)-C(26)  | 1.515(7) |
| O(1)-H(1A)   | 0.8400   | C(25)-H(25)  | 1.0000   |
| C(1)-C(2)    | 1.391(5) | C(26)-H(26A) | 0.9800   |
| C(1)-C(18)   | 1.421(5) | C(26)-H(26B) | 0.9800   |
| C(1)-H(1)    | 0.9500   | C(26)-H(26C) | 0.9800   |
| C(2)-C(16)   | 1.424(6) | C(27)-H(27A) | 0.9800   |
| C(2)-C(3)    | 1.452(5) | C(27)-H(27B) | 0.9800   |
| C(3)-C(4)    | 1.383(5) | C(27)-H(27C) | 0.9800   |
| C(4)-C(17)   | 1.425(6) | C(28)-C(29)  | 1.390(6) |
| C(4)-C(5)    | 1.540(5) | C(28)-H(28)  | 0.9500   |
| C(5)-C(7)    | 1.524(7) | C(29)-C(30)  | 1.411(5) |
| C(5)-C(8)    | 1.527(6) | C(29)-H(29)  | 0.9500   |
| C(5)-C(6)    | 1.533(6) | C(30)-C(32)  | 1.399(6) |
| C(6)-H(6A)   | 0.9800   | C(30)-C(31)  | 1.502(5) |
| C(6)-H(6B)   | 0.9800   | C(31)-H(31A) | 0.9800   |
| C(6)-H(6C)   | 0.9800   | C(31)-H(31B) | 0.9800   |
| C(7)-H(7A)   | 0.9800   | C(31)-H(31C) | 0.9800   |
| C(7)-H(7B)   | 0.9800   | N(2)-C(57)   | 1.339(5) |
| C(7)-H(7C)   | 0.9800   | N(2)-C(49)   | 1.465(6) |
| C(8)-C(9)    | 1.473(7) | N(2)-C(50)   | 1.478(6) |
| C(8)-H(8A)   | 0.9900   | O(2)-C(43)   | 1.345(5) |
| C(8)-H(8B)   | 0.9900   | O(2)-H(2)    | 0.87(3)  |
| C(9)-H(9A)   | 0.9900   | C(41)-C(42)  | 1.385(5) |
| C(9)-H(9B)   | 0.9900   | C(41)-C(58)  | 1.426(5) |
| C(10)-C(11)  | 1.548(9) | C(41)-H(41)  | 0.9500   |
| C(10)-H(10A) | 0.9900   | C(42)-C(56)  | 1.424(6) |
| C(10)-H(10B) | 0.9900   | C(42)-C(43)  | 1.442(5) |
| C(11)-C(12)  | 1.520(7) | C(43)-C(44)  | 1.372(5) |
| C(11)-H(11A) | 0.9900   | C(44)-C(57)  | 1.424(6) |
| C(11)-H(11B) | 0.9900   | C(44)-C(45)  | 1.542(5) |
| C(12)-C(14)  | 1.517(7) | C(45)-C(46)  | 1.527(6) |
| C(12)-C(13)  | 1.517(7) | C(45)-C(48)  | 1.531(6) |
| C(12)-C(15)  | 1.518(6) | C(45)-C(47)  | 1.536(6) |
| C(13)-H(13A) | 0.9800   | C(46)-H(46A) | 0.9800   |
| C(13)-H(13B) | 0.9800   | C(46)-H(46B) | 0.9800   |
| C(13)-H(13C) | 0.9800   | C(46)-H(46C) | 0.9800   |
| C(14)-H(14A) | 0.9800   | C(47)-H(47A) | 0.9800   |
| C(14)-H(14B) | 0.9800   | C(47)-H(47B) | 0.9800   |
| C(14)-H(14C) | 0.9800   | C(47)-H(47C) | 0.9800   |
| C(15)-C(16)  | 1.358(5) | C(48)-C(49)  | 1.474(7) |
| C(15)-C(17)  | 1.463(5) | C(48)-H(48A) | 0.9900   |
| C(16)-H(16)  | 0.9500   | C(48)-H(48B) | 0.9900   |
| C(18)-C(19)  | 1.417(6) | C(49)-H(49A) | 0.9900   |
| C(18)-C(32)  | 1.442(5) | C(49)-H(49B) | 0.9900   |
| C(19)-C(20)  | 1.376(5) | C(50)-C(51)  | 1.506(7) |
| C(19)-H(19)  | 0.9500   | C(50)-H(50A) | 0.9900   |
| C(20)-C(22)  | 1.418(6) | C(50)-H(50B) | 0.9900   |
| C(20)-C(21)  | 1.497(6) | C(51)-C(52)  | 1.518(6) |
| C(21)-H(21A) | 0.9800   | C(51)-H(51A) | 0.9900   |
| C(21)-H(21B) | 0.9800   | C(51)-H(51B) | 0.9900   |
| C(21)-H(21C) | 0.9800   | C(52)-C(54)  | 1.522(6) |
| C(22)-C(23)  | 1.390(5) | C(52)-C(53)  | 1.531(6) |
| C(22)-C(32)  | 1.480(5) | C(52)-C(55)  | 1.534(5) |
| C(23)-C(24)  | 1.382(6) | C(53)-H(53A) | 0.9800   |
| C(23)-H(23)  | 0.9500   | C(53)-H(53B) | 0.9800   |

|               |           |              |           |
|---------------|-----------|--------------|-----------|
| C(53)-H(53C)  | 0.9800    | C(69)-C(70)  | 1.418(6)  |
| C(54)-H(54A)  | 0.9800    | C(69)-H(69)  | 0.9500    |
| C(54)-H(54B)  | 0.9800    | C(70)-C(72)  | 1.401(6)  |
| C(54)-H(54C)  | 0.9800    | C(70)-C(71)  | 1.506(6)  |
| C(55)-C(56)   | 1.344(5)  | C(71)-H(71A) | 0.9800    |
| C(55)-C(57)   | 1.463(5)  | C(71)-H(71B) | 0.9800    |
| C(56)-H(56)   | 0.9500    | C(71)-H(71C) | 0.9800    |
| C(58)-C(59)   | 1.420(6)  | P(1)-F(4A)   | 1.334(11) |
| C(58)-C(72)   | 1.430(5)  | P(1)-F(5)    | 1.483(5)  |
| C(59)-C(60)   | 1.379(6)  | P(1)-F(6A)   | 1.492(16) |
| C(59)-H(59)   | 0.9500    | P(1)-F(3)    | 1.563(7)  |
| C(60)-C(62)   | 1.400(7)  | P(1)-F(1)    | 1.587(4)  |
| C(60)-C(61)   | 1.499(6)  | P(1)-F(4)    | 1.596(5)  |
| C(61)-H(61A)  | 0.9800    | P(1)-F(2)    | 1.603(4)  |
| C(61)-H(61B)  | 0.9800    | P(1)-F(6)    | 1.674(6)  |
| C(61)-H(61C)  | 0.9800    | P(1)-F(5A)   | 1.694(12) |
| C(62)-C(63)   | 1.397(5)  | P(1)-F(3A)   | 1.818(13) |
| C(62)-C(72)   | 1.485(5)  | P(2)-F(11A)  | 1.50(2)   |
| C(63)-C(64)   | 1.365(7)  | P(2)-F(9)    | 1.524(6)  |
| C(63)-H(63)   | 0.9500    | P(2)-F(7)    | 1.543(4)  |
| C(64)-C(68)   | 1.374(8)  | P(2)-F(11)   | 1.560(6)  |
| C(64)-C(65)   | 1.552(7)  | P(2)-F(10)   | 1.569(6)  |
| C(64)-C(65A)  | 1.57(3)   | P(2)-F(10A)  | 1.58(2)   |
| C(65)-C(67)   | 1.495(10) | P(2)-F(8)    | 1.594(4)  |
| C(65)-C(66)   | 1.519(9)  | P(2)-F(12)   | 1.615(7)  |
| C(65)-H(65)   | 1.0000    | P(2)-F(9A)   | 1.627(17) |
| C(65A)-C(67)  | 1.36(3)   | P(2)-F(12A)  | 1.77(2)   |
| C(65A)-C(66)  | 1.52(4)   | F(7)-F(10A)  | 1.68(2)   |
| C(65A)-H(65A) | 1.0000    | O(3)-H(3A)   | 0.90(2)   |
| C(66)-H(66A)  | 0.9800    | O(3)-H(3B)   | 0.86(3)   |
| C(66)-H(66B)  | 0.9800    | O(4)-H(4A)   | 0.9057    |
| C(66)-H(66C)  | 0.9800    | O(4)-H(4B)   | 0.8575    |
| C(67)-H(67A)  | 0.9800    | O(5)-H(5A)   | 0.8483    |
| C(67)-H(67B)  | 0.9800    | O(5)-H(5B)   | 0.8599    |
| C(67)-H(67C)  | 0.9800    | O(6)-H(4A)   | 1.1016    |
| C(68)-C(69)   | 1.407(6)  | O(6)-H(6D)   | 0.7950    |
| C(68)-H(68)   | 0.9500    | O(6)-H(6E)   | 0.7806    |

---

**Table S18:** Bond angles [°] for **30**.

|                     |          |                     |          |
|---------------------|----------|---------------------|----------|
| C(17)-N(1)-C(9)     | 121.7(4) | C(14)-C(12)-C(13)   | 107.5(5) |
| C(17)-N(1)-C(10)    | 124.3(4) | C(14)-C(12)-C(15)   | 113.1(4) |
| C(9)-N(1)-C(10)     | 113.6(4) | C(13)-C(12)-C(15)   | 108.1(4) |
| C(3)-O(1)-H(1A)     | 109.5    | C(14)-C(12)-C(11)   | 109.1(5) |
| C(2)-C(1)-C(18)     | 127.1(4) | C(13)-C(12)-C(11)   | 111.1(4) |
| C(2)-C(1)-H(1)      | 116.5    | C(15)-C(12)-C(11)   | 108.0(4) |
| C(18)-C(1)-H(1)     | 116.5    | C(12)-C(13)-H(13A)  | 109.5    |
| C(1)-C(2)-C(16)     | 123.8(3) | C(12)-C(13)-H(13B)  | 109.5    |
| C(1)-C(2)-C(3)      | 118.8(4) | H(13A)-C(13)-H(13B) | 109.5    |
| C(16)-C(2)-C(3)     | 117.0(3) | C(12)-C(13)-H(13C)  | 109.5    |
| O(1)-C(3)-C(4)      | 118.9(3) | H(13A)-C(13)-H(13C) | 109.5    |
| O(1)-C(3)-C(2)      | 119.4(3) | H(13B)-C(13)-H(13C) | 109.5    |
| C(4)-C(3)-C(2)      | 121.6(4) | C(12)-C(14)-H(14A)  | 109.5    |
| C(3)-C(4)-C(17)     | 118.9(3) | C(12)-C(14)-H(14B)  | 109.5    |
| C(3)-C(4)-C(5)      | 120.1(4) | H(14A)-C(14)-H(14B) | 109.5    |
| C(17)-C(4)-C(5)     | 121.0(3) | C(12)-C(14)-H(14C)  | 109.5    |
| C(7)-C(5)-C(8)      | 106.8(4) | H(14A)-C(14)-H(14C) | 109.5    |
| C(7)-C(5)-C(6)      | 110.1(4) | H(14B)-C(14)-H(14C) | 109.5    |
| C(8)-C(5)-C(6)      | 110.1(3) | C(16)-C(15)-C(17)   | 118.1(4) |
| C(7)-C(5)-C(4)      | 112.4(3) | C(16)-C(15)-C(12)   | 123.0(3) |
| C(8)-C(5)-C(4)      | 107.5(3) | C(17)-C(15)-C(12)   | 118.9(3) |
| C(6)-C(5)-C(4)      | 109.9(3) | C(15)-C(16)-C(2)    | 123.5(3) |
| C(5)-C(6)-H(6A)     | 109.5    | C(15)-C(16)-H(16)   | 118.3    |
| C(5)-C(6)-H(6B)     | 109.5    | C(2)-C(16)-H(16)    | 118.3    |
| H(6A)-C(6)-H(6B)    | 109.5    | N(1)-C(17)-C(4)     | 120.8(3) |
| C(5)-C(6)-H(6C)     | 109.5    | N(1)-C(17)-C(15)    | 118.7(4) |
| H(6A)-C(6)-H(6C)    | 109.5    | C(4)-C(17)-C(15)    | 120.4(3) |
| H(6B)-C(6)-H(6C)    | 109.5    | C(19)-C(18)-C(1)    | 124.3(4) |
| C(5)-C(7)-H(7A)     | 109.5    | C(19)-C(18)-C(32)   | 107.1(3) |
| C(5)-C(7)-H(7B)     | 109.5    | C(1)-C(18)-C(32)    | 128.1(4) |
| H(7A)-C(7)-H(7B)    | 109.5    | C(20)-C(19)-C(18)   | 111.7(4) |
| C(5)-C(7)-H(7C)     | 109.5    | C(20)-C(19)-H(19)   | 124.1    |
| H(7A)-C(7)-H(7C)    | 109.5    | C(18)-C(19)-H(19)   | 124.1    |
| H(7B)-C(7)-H(7C)    | 109.5    | C(19)-C(20)-C(22)   | 107.3(4) |
| C(9)-C(8)-C(5)      | 113.4(4) | C(19)-C(20)-C(21)   | 126.3(4) |
| C(9)-C(8)-H(8A)     | 108.9    | C(22)-C(20)-C(21)   | 126.4(3) |
| C(5)-C(8)-H(8A)     | 108.9    | C(20)-C(21)-H(21A)  | 109.5    |
| C(9)-C(8)-H(8B)     | 108.9    | C(20)-C(21)-H(21B)  | 109.5    |
| C(5)-C(8)-H(8B)     | 108.9    | H(21A)-C(21)-H(21B) | 109.5    |
| H(8A)-C(8)-H(8B)    | 107.7    | C(20)-C(21)-H(21C)  | 109.5    |
| N(1)-C(9)-C(8)      | 110.7(3) | H(21A)-C(21)-H(21C) | 109.5    |
| N(1)-C(9)-H(9A)     | 109.5    | H(21B)-C(21)-H(21C) | 109.5    |
| C(8)-C(9)-H(9A)     | 109.5    | C(23)-C(22)-C(20)   | 121.1(4) |
| N(1)-C(9)-H(9B)     | 109.5    | C(23)-C(22)-C(32)   | 130.3(4) |
| C(8)-C(9)-H(9B)     | 109.5    | C(20)-C(22)-C(32)   | 108.5(3) |
| H(9A)-C(9)-H(9B)    | 108.1    | C(24)-C(23)-C(22)   | 130.5(4) |
| N(1)-C(10)-C(11)    | 111.3(4) | C(24)-C(23)-H(23)   | 114.8    |
| N(1)-C(10)-H(10A)   | 109.4    | C(22)-C(23)-H(23)   | 114.8    |
| C(11)-C(10)-H(10A)  | 109.4    | C(23)-C(24)-C(28)   | 123.9(3) |
| N(1)-C(10)-H(10B)   | 109.4    | C(23)-C(24)-C(25)   | 117.3(4) |
| C(11)-C(10)-H(10B)  | 109.4    | C(28)-C(24)-C(25)   | 118.9(4) |
| H(10A)-C(10)-H(10B) | 108.0    | C(27)-C(25)-C(26)   | 113.1(4) |
| C(12)-C(11)-C(10)   | 107.9(5) | C(27)-C(25)-C(24)   | 112.0(4) |
| C(12)-C(11)-H(11A)  | 110.1    | C(26)-C(25)-C(24)   | 110.6(4) |
| C(10)-C(11)-H(11A)  | 110.1    | C(27)-C(25)-H(25)   | 106.9    |
| C(12)-C(11)-H(11B)  | 110.1    | C(26)-C(25)-H(25)   | 106.9    |
| C(10)-C(11)-H(11B)  | 110.1    | C(24)-C(25)-H(25)   | 106.9    |
| H(11A)-C(11)-H(11B) | 108.4    | C(25)-C(26)-H(26A)  | 109.5    |

|                     |          |                     |          |
|---------------------|----------|---------------------|----------|
| C(25)-C(26)-H(26B)  | 109.5    | C(45)-C(47)-H(47C)  | 109.5    |
| H(26A)-C(26)-H(26B) | 109.5    | H(47A)-C(47)-H(47C) | 109.5    |
| C(25)-C(26)-H(26C)  | 109.5    | H(47B)-C(47)-H(47C) | 109.5    |
| H(26A)-C(26)-H(26C) | 109.5    | C(49)-C(48)-C(45)   | 113.7(4) |
| H(26B)-C(26)-H(26C) | 109.5    | C(49)-C(48)-H(48A)  | 108.8    |
| C(25)-C(27)-H(27A)  | 109.5    | C(45)-C(48)-H(48A)  | 108.8    |
| C(25)-C(27)-H(27B)  | 109.5    | C(49)-C(48)-H(48B)  | 108.8    |
| H(27A)-C(27)-H(27B) | 109.5    | C(45)-C(48)-H(48B)  | 108.8    |
| C(25)-C(27)-H(27C)  | 109.5    | H(48A)-C(48)-H(48B) | 107.7    |
| H(27A)-C(27)-H(27C) | 109.5    | N(2)-C(49)-C(48)    | 110.2(3) |
| H(27B)-C(27)-H(27C) | 109.5    | N(2)-C(49)-H(49A)   | 109.6    |
| C(24)-C(28)-C(29)   | 131.7(4) | C(48)-C(49)-H(49A)  | 109.6    |
| C(24)-C(28)-H(28)   | 114.2    | N(2)-C(49)-H(49B)   | 109.6    |
| C(29)-C(28)-H(28)   | 114.2    | C(48)-C(49)-H(49B)  | 109.6    |
| C(28)-C(29)-C(30)   | 132.1(4) | H(49A)-C(49)-H(49B) | 108.1    |
| C(28)-C(29)-H(29)   | 113.9    | N(2)-C(50)-C(51)    | 113.1(4) |
| C(30)-C(29)-H(29)   | 113.9    | N(2)-C(50)-H(50A)   | 109.0    |
| C(32)-C(30)-C(29)   | 124.7(4) | C(51)-C(50)-H(50A)  | 109.0    |
| C(32)-C(30)-C(31)   | 120.8(3) | N(2)-C(50)-H(50B)   | 109.0    |
| C(29)-C(30)-C(31)   | 114.4(4) | C(51)-C(50)-H(50B)  | 109.0    |
| C(30)-C(31)-H(31A)  | 109.5    | H(50A)-C(50)-H(50B) | 107.8    |
| C(30)-C(31)-H(31B)  | 109.5    | C(50)-C(51)-C(52)   | 110.7(4) |
| H(31A)-C(31)-H(31B) | 109.5    | C(50)-C(51)-H(51A)  | 109.5    |
| C(30)-C(31)-H(31C)  | 109.5    | C(52)-C(51)-H(51A)  | 109.5    |
| H(31A)-C(31)-H(31C) | 109.5    | C(50)-C(51)-H(51B)  | 109.5    |
| H(31B)-C(31)-H(31C) | 109.5    | C(52)-C(51)-H(51B)  | 109.5    |
| C(30)-C(32)-C(18)   | 128.4(3) | H(51A)-C(51)-H(51B) | 108.1    |
| C(30)-C(32)-C(22)   | 126.0(3) | C(51)-C(52)-C(54)   | 109.7(4) |
| C(18)-C(32)-C(22)   | 105.3(3) | C(51)-C(52)-C(53)   | 110.5(4) |
| C(57)-N(2)-C(49)    | 121.3(4) | C(54)-C(52)-C(53)   | 109.4(4) |
| C(57)-N(2)-C(50)    | 124.2(4) | C(51)-C(52)-C(55)   | 106.3(3) |
| C(49)-N(2)-C(50)    | 114.3(4) | C(54)-C(52)-C(55)   | 112.8(3) |
| C(43)-O(2)-H(2)     | 106(6)   | C(53)-C(52)-C(55)   | 108.1(3) |
| C(42)-C(41)-C(58)   | 126.6(4) | C(52)-C(53)-H(53A)  | 109.5    |
| C(42)-C(41)-H(41)   | 116.7    | C(52)-C(53)-H(53B)  | 109.5    |
| C(58)-C(41)-H(41)   | 116.7    | H(53A)-C(53)-H(53B) | 109.5    |
| C(41)-C(42)-C(56)   | 123.6(3) | C(52)-C(53)-H(53C)  | 109.5    |
| C(41)-C(42)-C(43)   | 119.3(4) | H(53A)-C(53)-H(53C) | 109.5    |
| C(56)-C(42)-C(43)   | 116.6(3) | H(53B)-C(53)-H(53C) | 109.5    |
| O(2)-C(43)-C(44)    | 119.4(3) | C(52)-C(54)-H(54A)  | 109.5    |
| O(2)-C(43)-C(42)    | 118.1(3) | C(52)-C(54)-H(54B)  | 109.5    |
| C(44)-C(43)-C(42)   | 122.5(4) | H(54A)-C(54)-H(54B) | 109.5    |
| C(43)-C(44)-C(57)   | 118.2(3) | C(52)-C(54)-H(54C)  | 109.5    |
| C(43)-C(44)-C(45)   | 121.2(4) | H(54A)-C(54)-H(54C) | 109.5    |
| C(57)-C(44)-C(45)   | 120.5(3) | H(54B)-C(54)-H(54C) | 109.5    |
| C(46)-C(45)-C(48)   | 107.3(4) | C(56)-C(55)-C(57)   | 118.8(4) |
| C(46)-C(45)-C(47)   | 110.2(4) | C(56)-C(55)-C(52)   | 122.9(3) |
| C(48)-C(45)-C(47)   | 110.3(3) | C(57)-C(55)-C(52)   | 118.3(3) |
| C(46)-C(45)-C(44)   | 112.4(3) | C(55)-C(56)-C(42)   | 122.7(3) |
| C(48)-C(45)-C(44)   | 107.0(3) | C(55)-C(56)-H(56)   | 118.6    |
| C(47)-C(45)-C(44)   | 109.6(3) | C(42)-C(56)-H(56)   | 118.6    |
| C(45)-C(46)-H(46A)  | 109.5    | N(2)-C(57)-C(44)    | 121.6(3) |
| C(45)-C(46)-H(46B)  | 109.5    | N(2)-C(57)-C(55)    | 118.7(4) |
| H(46A)-C(46)-H(46B) | 109.5    | C(44)-C(57)-C(55)   | 119.8(3) |
| C(45)-C(46)-H(46C)  | 109.5    | C(59)-C(58)-C(41)   | 122.3(4) |
| H(46A)-C(46)-H(46C) | 109.5    | C(59)-C(58)-C(72)   | 107.3(3) |
| H(46B)-C(46)-H(46C) | 109.5    | C(41)-C(58)-C(72)   | 129.7(4) |
| C(45)-C(47)-H(47A)  | 109.5    | C(60)-C(59)-C(58)   | 110.9(4) |
| C(45)-C(47)-H(47B)  | 109.5    | C(60)-C(59)-H(59)   | 124.5    |
| H(47A)-C(47)-H(47B) | 109.5    | C(58)-C(59)-H(59)   | 124.5    |

|                     |          |                    |           |
|---------------------|----------|--------------------|-----------|
| C(59)-C(60)-C(62)   | 108.0(4) | C(70)-C(72)-C(62)  | 126.5(4)  |
| C(59)-C(60)-C(61)   | 124.6(5) | C(58)-C(72)-C(62)  | 105.4(4)  |
| C(62)-C(60)-C(61)   | 127.3(4) | F(4A)-P(1)-F(6A)   | 99.4(15)  |
| C(60)-C(61)-H(61A)  | 109.5    | F(5)-P(1)-F(3)     | 96.5(6)   |
| C(60)-C(61)-H(61B)  | 109.5    | F(4A)-P(1)-F(1)    | 88.6(7)   |
| H(61A)-C(61)-H(61B) | 109.5    | F(5)-P(1)-F(1)     | 89.8(3)   |
| C(60)-C(61)-H(61C)  | 109.5    | F(6A)-P(1)-F(1)    | 82.7(8)   |
| H(61A)-C(61)-H(61C) | 109.5    | F(3)-P(1)-F(1)     | 95.2(4)   |
| H(61B)-C(61)-H(61C) | 109.5    | F(5)-P(1)-F(4)     | 94.1(6)   |
| C(63)-C(62)-C(60)   | 122.1(4) | F(3)-P(1)-F(4)     | 168.6(5)  |
| C(63)-C(62)-C(72)   | 129.4(4) | F(1)-P(1)-F(4)     | 89.1(2)   |
| C(60)-C(62)-C(72)   | 108.4(3) | F(4A)-P(1)-F(2)    | 91.2(7)   |
| C(64)-C(63)-C(62)   | 131.4(5) | F(5)-P(1)-F(2)     | 88.8(3)   |
| C(64)-C(63)-H(63)   | 114.3    | F(6A)-P(1)-F(2)    | 99.5(8)   |
| C(62)-C(63)-H(63)   | 114.3    | F(3)-P(1)-F(2)     | 86.8(4)   |
| C(63)-C(64)-C(68)   | 123.9(4) | F(1)-P(1)-F(2)     | 177.7(2)  |
| C(63)-C(64)-C(65)   | 115.3(7) | F(4)-P(1)-F(2)     | 89.2(3)   |
| C(68)-C(64)-C(65)   | 120.8(7) | F(5)-P(1)-F(6)     | 177.3(4)  |
| C(63)-C(64)-C(65A)  | 143(2)   | F(3)-P(1)-F(6)     | 84.4(4)   |
| C(68)-C(64)-C(65A)  | 92(2)    | F(1)-P(1)-F(6)     | 92.7(3)   |
| C(67)-C(65)-C(66)   | 113.9(7) | F(4)-P(1)-F(6)     | 84.8(4)   |
| C(67)-C(65)-C(64)   | 110.1(7) | F(2)-P(1)-F(6)     | 88.7(3)   |
| C(66)-C(65)-C(64)   | 109.5(6) | F(4A)-P(1)-F(5A)   | 96.2(12)  |
| C(67)-C(65)-H(65)   | 107.7    | F(6A)-P(1)-F(5A)   | 163.6(13) |
| C(66)-C(65)-H(65)   | 107.7    | F(1)-P(1)-F(5A)    | 92.6(4)   |
| C(64)-C(65)-H(65)   | 107.7    | F(2)-P(1)-F(5A)    | 85.2(4)   |
| C(67)-C(65A)-C(66)  | 122(2)   | F(4A)-P(1)-F(3A)   | 174.1(8)  |
| C(67)-C(65A)-C(64)  | 117(2)   | F(6A)-P(1)-F(3A)   | 83.6(12)  |
| C(66)-C(65A)-C(64)  | 108(3)   | F(1)-P(1)-F(3A)    | 86.7(5)   |
| C(67)-C(65A)-H(65A) | 102.1    | F(2)-P(1)-F(3A)    | 93.3(5)   |
| C(66)-C(65A)-H(65A) | 102.1    | F(5A)-P(1)-F(3A)   | 80.4(9)   |
| C(64)-C(65A)-H(65A) | 102.1    | F(11A)-P(2)-F(7)   | 94.4(8)   |
| C(65)-C(66)-H(66A)  | 109.5    | F(9)-P(2)-F(7)     | 93.3(4)   |
| C(65)-C(66)-H(66B)  | 109.5    | F(9)-P(2)-F(11)    | 96.3(5)   |
| H(66A)-C(66)-H(66B) | 109.5    | F(7)-P(2)-F(11)    | 83.1(4)   |
| C(65)-C(66)-H(66C)  | 109.5    | F(9)-P(2)-F(10)    | 170.7(5)  |
| H(66A)-C(66)-H(66C) | 109.5    | F(7)-P(2)-F(10)    | 91.6(3)   |
| H(66B)-C(66)-H(66C) | 109.5    | F(11)-P(2)-F(10)   | 92.1(6)   |
| C(65)-C(67)-H(67A)  | 109.5    | F(11A)-P(2)-F(10A) | 84.1(12)  |
| C(65)-C(67)-H(67B)  | 109.5    | F(7)-P(2)-F(10A)   | 65.2(11)  |
| H(67A)-C(67)-H(67B) | 109.5    | F(11A)-P(2)-F(8)   | 80.3(8)   |
| C(65)-C(67)-H(67C)  | 109.5    | F(9)-P(2)-F(8)     | 86.9(4)   |
| H(67A)-C(67)-H(67C) | 109.5    | F(7)-P(2)-F(8)     | 171.4(3)  |
| H(67B)-C(67)-H(67C) | 109.5    | F(11)-P(2)-F(8)    | 88.4(3)   |
| C(64)-C(68)-C(69)   | 132.2(5) | F(10)-P(2)-F(8)    | 89.4(4)   |
| C(64)-C(68)-H(68)   | 113.9    | F(10A)-P(2)-F(8)   | 120.5(11) |
| C(69)-C(68)-H(68)   | 113.9    | F(9)-P(2)-F(12)    | 87.4(5)   |
| C(68)-C(69)-C(70)   | 131.4(5) | F(7)-P(2)-F(12)    | 104.1(4)  |
| C(68)-C(69)-H(69)   | 114.3    | F(11)-P(2)-F(12)   | 171.8(5)  |
| C(70)-C(69)-H(69)   | 114.3    | F(10)-P(2)-F(12)   | 83.8(5)   |
| C(72)-C(70)-C(69)   | 124.4(4) | F(8)-P(2)-F(12)    | 84.5(4)   |
| C(72)-C(70)-C(71)   | 121.0(3) | F(11A)-P(2)-F(9A)  | 102.3(16) |
| C(69)-C(70)-C(71)   | 114.6(4) | F(7)-P(2)-F(9A)    | 88.7(6)   |
| C(70)-C(71)-H(71A)  | 109.5    | F(10A)-P(2)-F(9A)  | 153.7(13) |
| C(70)-C(71)-H(71B)  | 109.5    | F(8)-P(2)-F(9A)    | 85.8(6)   |
| H(71A)-C(71)-H(71B) | 109.5    | F(11A)-P(2)-F(12A) | 159.0(11) |
| C(70)-C(71)-H(71C)  | 109.5    | F(7)-P(2)-F(12A)   | 68.4(6)   |
| H(71A)-C(71)-H(71C) | 109.5    | F(10A)-P(2)-F(12A) | 77.8(14)  |
| H(71B)-C(71)-H(71C) | 109.5    | F(8)-P(2)-F(12A)   | 118.1(6)  |
| C(70)-C(72)-C(58)   | 127.8(3) | F(9A)-P(2)-F(12A)  | 89.8(13)  |

|                  |          |                  |       |
|------------------|----------|------------------|-------|
| P(2)-F(7)-F(10A) | 58.6(10) | H(5A)-O(5)-H(5B) | 106.1 |
| P(2)-F(10A)-F(7) | 56.3(7)  | H(4A)-O(6)-H(6D) | 124.1 |
| H(3A)-O(3)-H(3B) | 102(3)   | H(4A)-O(6)-H(6E) | 102.5 |
| H(4A)-O(4)-H(4B) | 101.2    | H(6D)-O(6)-H(6E) | 111.1 |

---

Symmetry transformations used to generate equivalent atoms:

**Table S19:** Anisotropic displacement parameters ( $\text{\AA}^2 \times 10^3$ ) for **30**. The anisotropic displacement factor exponent takes the form:  $-2\pi^2 [ h^2 a^{*2} U^{11} + \dots + 2 h k a^* b^* U^{12} ]$

|       | $U^{11}$ | $U^{22}$ | $U^{33}$ | $U^{23}$ | $U^{13}$ | $U^{12}$ |
|-------|----------|----------|----------|----------|----------|----------|
| N(1)  | 60(2)    | 58(2)    | 20(2)    | -8(1)    | -8(2)    | -18(2)   |
| O(1)  | 45(2)    | 66(2)    | 25(1)    | -10(1)   | -6(1)    | -15(2)   |
| C(1)  | 40(2)    | 45(2)    | 19(2)    | -10(1)   | -7(1)    | -4(2)    |
| C(2)  | 41(2)    | 38(2)    | 18(2)    | -9(1)    | -4(1)    | -2(2)    |
| C(3)  | 42(2)    | 37(2)    | 20(2)    | -9(1)    | -3(2)    | -5(2)    |
| C(4)  | 42(2)    | 34(2)    | 19(2)    | -9(1)    | -3(1)    | 0(2)     |
| C(5)  | 46(2)    | 47(2)    | 17(2)    | -10(1)   | 1(2)     | -1(2)    |
| C(6)  | 59(3)    | 52(2)    | 27(2)    | -10(2)   | 1(2)     | -17(2)   |
| C(7)  | 53(3)    | 82(3)    | 37(2)    | -13(2)   | 0(2)     | 19(3)    |
| C(8)  | 64(3)    | 49(2)    | 24(2)    | -15(2)   | 4(2)     | -8(2)    |
| C(9)  | 72(3)    | 60(3)    | 18(2)    | -11(2)   | -4(2)    | -18(2)   |
| C(10) | 85(4)    | 138(6)   | 24(2)    | -9(3)    | -16(2)   | -51(4)   |
| C(11) | 80(4)    | 79(3)    | 55(3)    | -15(3)   | -33(3)   | -8(3)    |
| C(12) | 48(2)    | 49(2)    | 26(2)    | -12(2)   | -9(2)    | -9(2)    |
| C(13) | 85(4)    | 71(3)    | 64(3)    | -18(3)   | -29(3)   | -17(3)   |
| C(14) | 58(3)    | 190(8)   | 66(4)    | -68(5)   | -11(3)   | -23(4)   |
| C(15) | 43(2)    | 37(2)    | 24(2)    | -10(1)   | -6(2)    | -3(2)    |
| C(16) | 41(2)    | 40(2)    | 21(2)    | -10(1)   | -3(1)    | -4(2)    |
| C(17) | 49(2)    | 35(2)    | 17(2)    | -10(1)   | -4(2)    | -4(2)    |
| C(18) | 40(2)    | 46(2)    | 16(2)    | -10(1)   | -9(1)    | 2(2)     |
| C(19) | 44(2)    | 48(2)    | 23(2)    | -10(2)   | -9(2)    | -2(2)    |
| C(20) | 45(2)    | 46(2)    | 26(2)    | -9(2)    | -12(2)   | -1(2)    |
| C(21) | 67(3)    | 53(2)    | 28(2)    | -8(2)    | -12(2)   | -6(2)    |
| C(22) | 36(2)    | 43(2)    | 19(2)    | -8(1)    | -7(1)    | 1(2)     |
| C(23) | 44(2)    | 52(2)    | 21(2)    | -7(2)    | -9(2)    | 2(2)     |
| C(24) | 44(2)    | 53(2)    | 20(2)    | -11(2)   | -6(2)    | -2(2)    |
| C(25) | 55(3)    | 65(3)    | 22(2)    | -14(2)   | -3(2)    | 1(2)     |
| C(26) | 66(3)    | 76(3)    | 21(2)    | -9(2)    | -12(2)   | 7(3)     |
| C(27) | 61(3)    | 78(3)    | 35(2)    | -12(2)   | 1(2)     | 10(3)    |
| C(28) | 49(2)    | 64(3)    | 24(2)    | -25(2)   | -11(2)   | 11(2)    |
| C(29) | 43(2)    | 47(2)    | 30(2)    | -14(2)   | -13(2)   | 4(2)     |
| C(30) | 35(2)    | 46(2)    | 24(2)    | -12(2)   | -12(1)   | 5(2)     |
| C(31) | 45(2)    | 48(2)    | 28(2)    | -10(2)   | -11(2)   | -5(2)    |
| C(32) | 37(2)    | 47(2)    | 16(2)    | -8(1)    | -10(1)   | 3(2)     |
| N(2)  | 53(2)    | 64(2)    | 22(2)    | -16(2)   | -4(1)    | -14(2)   |
| O(2)  | 69(2)    | 42(1)    | 25(1)    | -5(1)    | -12(1)   | -11(1)   |
| C(41) | 46(2)    | 37(2)    | 21(2)    | -6(1)    | -9(2)    | -3(2)    |
| C(42) | 44(2)    | 39(2)    | 21(2)    | -5(1)    | -10(1)   | -2(2)    |
| C(43) | 42(2)    | 38(2)    | 22(2)    | -5(1)    | -9(1)    | -6(2)    |
| C(44) | 34(2)    | 42(2)    | 20(2)    | -4(1)    | -7(1)    | -3(2)    |
| C(45) | 43(2)    | 48(2)    | 20(2)    | 0(2)     | -8(2)    | -5(2)    |
| C(46) | 57(3)    | 48(2)    | 39(2)    | 4(2)     | -12(2)   | 0(2)     |
| C(47) | 46(2)    | 60(3)    | 34(2)    | 2(2)     | -7(2)    | -12(2)   |
| C(48) | 61(3)    | 68(3)    | 18(2)    | 4(2)     | -12(2)   | -12(2)   |
| C(49) | 65(3)    | 76(3)    | 19(2)    | -13(2)   | -6(2)    | -16(3)   |
| C(50) | 68(3)    | 74(3)    | 36(2)    | -31(2)   | -2(2)    | -22(3)   |
| C(51) | 62(3)    | 58(3)    | 46(3)    | -25(2)   | -9(2)    | -8(2)    |
| C(52) | 46(2)    | 39(2)    | 34(2)    | -11(2)   | -12(2)   | -7(2)    |
| C(53) | 51(3)    | 53(2)    | 43(2)    | -12(2)   | -16(2)   | -11(2)   |
| C(54) | 72(3)    | 40(2)    | 48(3)    | -11(2)   | -25(2)   | -3(2)    |
| C(55) | 38(2)    | 42(2)    | 28(2)    | -13(2)   | -11(2)   | 3(2)     |
| C(56) | 39(2)    | 33(2)    | 24(2)    | -2(1)    | -7(1)    | -4(2)    |
| C(57) | 33(2)    | 44(2)    | 21(2)    | -10(1)   | -5(1)    | -1(2)    |
| C(58) | 51(2)    | 37(2)    | 19(2)    | -9(1)    | -8(2)    | -3(2)    |
| C(59) | 55(2)    | 45(2)    | 26(2)    | -12(2)   | -12(2)   | -3(2)    |



|        |         |         |         |         |          |         |
|--------|---------|---------|---------|---------|----------|---------|
| C(60)  | 57(3)   | 44(2)   | 26(2)   | -14(2)  | 1(2)     | -8(2)   |
| C(61)  | 66(3)   | 68(3)   | 38(2)   | -13(2)  | 3(2)     | -26(3)  |
| C(62)  | 63(3)   | 30(2)   | 22(2)   | -9(1)   | -3(2)    | 2(2)    |
| C(63)  | 76(3)   | 38(2)   | 20(2)   | -8(2)   | -5(2)    | 1(2)    |
| C(64)  | 77(3)   | 38(2)   | 22(2)   | -4(2)   | -13(2)   | 2(2)    |
| C(65)  | 52(7)   | 60(3)   | 22(3)   | 0(2)    | -7(3)    | -8(3)   |
| C(65A) | 40(30)  | 58(16)  | 30(13)  | 5(11)   | 0(12)    | -21(15) |
| C(66)  | 89(4)   | 79(3)   | 23(2)   | -13(2)  | -14(2)   | 8(3)    |
| C(67)  | 134(6)  | 76(4)   | 37(3)   | 13(3)   | -12(3)   | 8(4)    |
| C(68)  | 91(4)   | 49(2)   | 33(2)   | -14(2)  | -36(2)   | 14(2)   |
| C(69)  | 67(3)   | 45(2)   | 33(2)   | -18(2)  | -24(2)   | 12(2)   |
| C(70)  | 57(2)   | 33(2)   | 25(2)   | -15(1)  | -14(2)   | 6(2)    |
| C(71)  | 53(2)   | 40(2)   | 35(2)   | -12(2)  | -16(2)   | -4(2)   |
| C(72)  | 55(2)   | 32(2)   | 20(2)   | -11(1)  | -9(2)    | 2(2)    |
| P(1)   | 56(1)   | 86(1)   | 40(1)   | -19(1)  | -15(1)   | -2(1)   |
| F(1)   | 71(2)   | 122(3)  | 87(3)   | -49(2)  | -23(2)   | -21(2)  |
| F(2)   | 63(2)   | 106(3)  | 79(2)   | 7(2)    | -10(2)   | -20(2)  |
| F(3)   | 133(7)  | 157(7)  | 76(5)   | -73(5)  | -27(4)   | 55(6)   |
| F(4)   | 78(4)   | 134(6)  | 56(3)   | -50(3)  | -1(3)    | -37(4)  |
| F(5)   | 104(5)  | 71(4)   | 167(10) | 39(5)   | -91(6)   | -14(4)  |
| F(6)   | 79(3)   | 82(4)   | 77(4)   | -2(3)   | -30(3)   | 9(3)    |
| F(3A)  | 70(7)   | 73(7)   | 116(12) | -35(8)  | 9(7)     | -9(6)   |
| F(4A)  | 75(8)   | 64(7)   | 160(20) | -33(9)  | 1(10)    | 40(6)   |
| F(5A)  | 80(8)   | 128(12) | 45(6)   | -25(6)  | -18(5)   | -44(8)  |
| F(6A)  | 109(12) | 197(19) | 30(6)   | 32(9)   | -16(7)   | -3(12)  |
| P(2)   | 101(1)  | 62(1)   | 32(1)   | -23(1)  | -14(1)   | 11(1)   |
| F(7)   | 193(5)  | 141(4)  | 60(2)   | -38(2)  | -55(3)   | 87(4)   |
| F(8)   | 173(5)  | 95(3)   | 58(2)   | -6(2)   | -43(3)   | -19(3)  |
| F(9)   | 142(7)  | 140(7)  | 95(5)   | -87(5)  | 5(5)     | 15(5)   |
| F(10)  | 197(9)  | 75(4)   | 75(4)   | -34(3)  | -27(5)   | 22(5)   |
| F(11)  | 104(5)  | 155(8)  | 114(6)  | 47(6)   | -24(4)   | -70(6)  |
| F(12)  | 118(5)  | 173(8)  | 104(5)  | -50(5)  | -30(4)   | -58(5)  |
| F(9A)  | 280(20) | 57(7)   | 103(14) | -39(8)  | -106(16) | 33(12)  |
| F(10A) | 135(13) | 120(12) | 180(14) | -66(10) | -27(10)  | -17(10) |
| F(11A) | 133(13) | 88(11)  | 166(16) | -51(10) | -90(12)  | 78(11)  |
| F(12A) | 116(12) | 136(14) | 83(11)  | -11(9)  | 53(9)    | -1(11)  |
| O(3)   | 111(4)  | 68(2)   | 48(2)   | -25(2)  | -7(2)    | 17(3)   |
| O(4)   | 68(2)   | 122(3)  | 48(2)   | -10(2)  | -27(2)   | 7(2)    |
| O(5)   | 93(9)   | 53(4)   | 88(8)   | 15(5)   | -32(6)   | -18(5)  |
| O(6)   | 60(13)  | 190(30) | 84(17)  | -91(19) | -28(11)  | 40(16)  |

---

**Table S20:** Hydrogen coordinates ( $\times 10^4$ ) and isotropic displacement parameters ( $\text{\AA}^2 \times 10^{-3}$ ) for **30**.

|        | x        | y        | z        | U(eq)   |
|--------|----------|----------|----------|---------|
| H(1A)  | 689      | 6299     | 6843     | 67      |
| H(1)   | 2299     | 5833     | 6100     | 15(8)   |
| H(6A)  | 449      | 4508     | 8343     | 70      |
| H(6B)  | -250     | 4617     | 9091     | 70      |
| H(6C)  | 1088     | 4406     | 8929     | 70      |
| H(7A)  | -676     | 6155     | 8035     | 93      |
| H(7B)  | -234     | 7273     | 8021     | 93      |
| H(7C)  | -1037    | 6620     | 8706     | 93      |
| H(8A)  | 620      | 7174     | 9016     | 56      |
| H(8B)  | 44       | 6130     | 9528     | 56      |
| H(9A)  | 1759     | 6339     | 9726     | 60      |
| H(9B)  | 1782     | 5240     | 9504     | 60      |
| H(10A) | 3758     | 5891     | 9409     | 96      |
| H(10B) | 3722     | 7153     | 9086     | 96      |
| H(11A) | 5490     | 6445     | 8550     | 81      |
| H(11B) | 4905     | 5555     | 8365     | 81      |
| H(13A) | 4627     | 8713     | 7394     | 105     |
| H(13B) | 5028     | 8350     | 8089     | 105     |
| H(13C) | 3729     | 8324     | 8108     | 105     |
| H(14A) | 5882     | 6327     | 7095     | 145     |
| H(14B) | 6426     | 7113     | 7385     | 145     |
| H(14C) | 5762     | 7592     | 6805     | 145     |
| H(16)  | 4303     | 7083     | 6566     | 41      |
| H(19)  | 3919     | 8213     | 5642     | 45      |
| H(21A) | 5895     | 9022     | 4163     | 74      |
| H(21B) | 4861     | 9633     | 4592     | 74      |
| H(21C) | 4814     | 9454     | 3870     | 74      |
| H(23)  | 5307     | 7988     | 3397     | 47      |
| H(25)  | 5738     | 7735     | 2386     | 58      |
| H(26A) | 5033     | 7190     | 1597     | 83      |
| H(26B) | 4040     | 7393     | 2234     | 83      |
| H(26C) | 4485     | 6199     | 2182     | 83      |
| H(27A) | 6524     | 5614     | 2295     | 93      |
| H(27B) | 7183     | 6407     | 2511     | 93      |
| H(27C) | 6998     | 6680     | 1756     | 93      |
| H(28)  | 4927     | 5123     | 3190     | 53      |
| H(29)  | 4119     | 4283     | 4216     | 47      |
| H(31A) | 2376     | 4725     | 5489     | 59      |
| H(31B) | 3480     | 4472     | 5775     | 59      |
| H(31C) | 3304     | 3833     | 5254     | 59      |
| H(2)   | 8240(60) | 4010(70) | 8260(30) | 130(30) |
| H(41)  | 8964     | 2609     | 8964     | 41      |
| H(46A) | 8187     | 5518     | 6288     | 76      |
| H(46B) | 8522     | 5243     | 7003     | 76      |
| H(46C) | 7411     | 4786     | 6950     | 76      |
| H(47A) | 10567    | 3540     | 6190     | 73      |
| H(47B) | 10351    | 4246     | 6743     | 73      |
| H(47C) | 10300    | 4802     | 5973     | 73      |
| H(48A) | 7704     | 3778     | 6031     | 61      |
| H(48B) | 8792     | 4352     | 5520     | 61      |
| H(49A) | 8736     | 2645     | 5373     | 64      |
| H(49B) | 9835     | 2740     | 5617     | 64      |
| H(50A) | 9345     | 720      | 5827     | 68      |
| H(50B) | 8000     | 824      | 5993     | 68      |

|        |          |          |         |        |
|--------|----------|----------|---------|--------|
| H(51A) | 9328     | -257     | 6907    | 64     |
| H(51B) | 8420     | -767     | 6676    | 64     |
| H(53A) | 6597     | 1011     | 6851    | 71     |
| H(53B) | 5970     | 501      | 7628    | 71     |
| H(53C) | 6343     | -230     | 7085    | 71     |
| H(54A) | 7383     | -1484    | 7871    | 77     |
| H(54B) | 7024     | -726     | 8397    | 77     |
| H(54C) | 8325     | -1050    | 8114    | 77     |
| H(56)  | 7672     | 589      | 8573    | 39     |
| H(59)  | 6513     | 1037     | 9492    | 49     |
| H(61A) | 5046     | 230      | 10569   | 88     |
| H(61B) | 5322     | 163      | 11285   | 88     |
| H(61C) | 5671     | -824     | 10928   | 88     |
| H(63)  | 6901     | -322     | 11695   | 56     |
| H(65)  | 7119     | -624     | 12686   | 56     |
| H(65A) | 9395     | -335     | 12439   | 54     |
| H(66A) | 8815     | 524      | 12852   | 97     |
| H(66B) | 7757     | 61       | 13454   | 97     |
| H(66C) | 7568     | 992      | 12817   | 97     |
| H(67A) | 9343     | -1412    | 12736   | 135    |
| H(67B) | 8495     | -2010    | 12514   | 135    |
| H(67C) | 8214     | -1854    | 13278   | 135    |
| H(68)  | 9881     | 177      | 11835   | 65     |
| H(69)  | 10758    | 904      | 10786   | 55     |
| H(71A) | 10459    | 1461     | 9231    | 62     |
| H(71B) | 11207    | 1587     | 9720    | 62     |
| H(71C) | 10272    | 2499     | 9537    | 62     |
| H(3A)  | 3440(30) | 5980(30) | 880(20) | 31(12) |
| H(3B)  | 2950(40) | 5100(30) | 860(30) | 76(19) |
| H(4A)  | 581      | 7695     | 5887    | 96     |
| H(4B)  | -353     | 7121     | 6065    | 96     |
| H(5A)  | 1715     | 9387     | 5438    | 97     |
| H(5B)  | 913      | 8880     | 5980    | 97     |
| H(6D)  | 665      | 9024     | 5585    | 123    |
| H(6E)  | 1537     | 8398     | 5685    | 123    |

---

**Table S21:** Torsion angles [°] for **30**.

|                         |           |                         |           |
|-------------------------|-----------|-------------------------|-----------|
| C(18)-C(1)-C(2)-C(16)   | -24.9(6)  | C(19)-C(20)-C(22)-C(32) | 1.0(5)    |
| C(18)-C(1)-C(2)-C(3)    | 162.9(4)  | C(21)-C(20)-C(22)-C(32) | -179.2(4) |
| C(1)-C(2)-C(3)-O(1)     | -5.4(5)   | C(20)-C(22)-C(23)-C(24) | 178.9(4)  |
| C(16)-C(2)-C(3)-O(1)    | -178.2(3) | C(32)-C(22)-C(23)-C(24) | -3.7(8)   |
| C(1)-C(2)-C(3)-C(4)     | 171.4(4)  | C(22)-C(23)-C(24)-C(28) | -6.2(8)   |
| C(16)-C(2)-C(3)-C(4)    | -1.3(5)   | C(22)-C(23)-C(24)-C(25) | 175.4(4)  |
| O(1)-C(3)-C(4)-C(17)    | 171.8(3)  | C(23)-C(24)-C(25)-C(27) | 115.2(5)  |
| C(2)-C(3)-C(4)-C(17)    | -5.1(5)   | C(28)-C(24)-C(25)-C(27) | -63.4(6)  |
| O(1)-C(3)-C(4)-C(5)     | -6.7(5)   | C(23)-C(24)-C(25)-C(26) | -117.7(5) |
| C(2)-C(3)-C(4)-C(5)     | 176.4(3)  | C(28)-C(24)-C(25)-C(26) | 63.8(6)   |
| C(3)-C(4)-C(5)-C(7)     | -46.2(5)  | C(23)-C(24)-C(28)-C(29) | 6.5(8)    |
| C(17)-C(4)-C(5)-C(7)    | 135.4(4)  | C(25)-C(24)-C(28)-C(29) | -175.1(5) |
| C(3)-C(4)-C(5)-C(8)     | -163.4(4) | C(24)-C(28)-C(29)-C(30) | 2.1(9)    |
| C(17)-C(4)-C(5)-C(8)    | 18.1(5)   | C(28)-C(29)-C(30)-C(32) | -4.9(7)   |
| C(3)-C(4)-C(5)-C(6)     | 76.7(5)   | C(28)-C(29)-C(30)-C(31) | 175.5(4)  |
| C(17)-C(4)-C(5)-C(6)    | -101.7(4) | C(29)-C(30)-C(32)-C(18) | -175.0(4) |
| C(7)-C(5)-C(8)-C(9)     | -170.5(4) | C(31)-C(30)-C(32)-C(18) | 4.6(6)    |
| C(6)-C(5)-C(8)-C(9)     | 70.0(5)   | C(29)-C(30)-C(32)-C(22) | -3.0(6)   |
| C(4)-C(5)-C(8)-C(9)     | -49.7(4)  | C(31)-C(30)-C(32)-C(22) | 176.6(4)  |
| C(17)-N(1)-C(9)-C(8)    | -30.5(6)  | C(19)-C(18)-C(32)-C(30) | 171.4(4)  |
| C(10)-N(1)-C(9)-C(8)    | 156.1(5)  | C(1)-C(18)-C(32)-C(30)  | -16.2(7)  |
| C(5)-C(8)-C(9)-N(1)     | 57.0(5)   | C(19)-C(18)-C(32)-C(22) | -1.9(4)   |
| C(17)-N(1)-C(10)-C(11)  | -18.2(8)  | C(1)-C(18)-C(32)-C(22)  | 170.6(4)  |
| C(9)-N(1)-C(10)-C(11)   | 155.0(5)  | C(23)-C(22)-C(32)-C(30) | 9.5(7)    |
| N(1)-C(10)-C(11)-C(12)  | 52.9(7)   | C(20)-C(22)-C(32)-C(30) | -172.9(4) |
| C(10)-C(11)-C(12)-C(14) | 175.0(5)  | C(23)-C(22)-C(32)-C(18) | -177.0(4) |
| C(10)-C(11)-C(12)-C(13) | 56.7(6)   | C(20)-C(22)-C(32)-C(18) | 0.6(4)    |
| C(10)-C(11)-C(12)-C(15) | -61.7(5)  | C(58)-C(41)-C(42)-C(56) | -22.1(7)  |
| C(14)-C(12)-C(15)-C(16) | -19.8(7)  | C(58)-C(41)-C(42)-C(43) | 165.3(4)  |
| C(13)-C(12)-C(15)-C(16) | 99.0(5)   | C(41)-C(42)-C(43)-O(2)  | -12.5(6)  |
| C(11)-C(12)-C(15)-C(16) | -140.6(4) | C(56)-C(42)-C(43)-O(2)  | 174.4(4)  |
| C(14)-C(12)-C(15)-C(17) | 159.5(5)  | C(41)-C(42)-C(43)-C(44) | 166.1(4)  |
| C(13)-C(12)-C(15)-C(17) | -81.6(5)  | C(56)-C(42)-C(43)-C(44) | -7.0(6)   |
| C(11)-C(12)-C(15)-C(17) | 38.7(5)   | O(2)-C(43)-C(44)-C(57)  | 175.9(4)  |
| C(17)-C(15)-C(16)-C(2)  | -3.8(6)   | C(42)-C(43)-C(44)-C(57) | -2.7(6)   |
| C(12)-C(15)-C(16)-C(2)  | 175.6(4)  | O(2)-C(43)-C(44)-C(45)  | -2.7(6)   |
| C(1)-C(2)-C(16)-C(15)   | -166.4(4) | C(42)-C(43)-C(44)-C(45) | 178.8(4)  |
| C(3)-C(2)-C(16)-C(15)   | 6.0(6)    | C(43)-C(44)-C(45)-C(46) | -46.6(5)  |
| C(9)-N(1)-C(17)-C(4)    | -1.1(6)   | C(57)-C(44)-C(45)-C(46) | 134.8(4)  |
| C(10)-N(1)-C(17)-C(4)   | 171.5(5)  | C(43)-C(44)-C(45)-C(48) | -164.2(4) |
| C(9)-N(1)-C(17)-C(15)   | 180.0(4)  | C(57)-C(44)-C(45)-C(48) | 17.3(5)   |
| C(10)-N(1)-C(17)-C(15)  | -7.4(7)   | C(43)-C(44)-C(45)-C(47) | 76.2(5)   |
| C(3)-C(4)-C(17)-N(1)    | -171.5(4) | C(57)-C(44)-C(45)-C(47) | -102.4(4) |
| C(5)-C(4)-C(17)-N(1)    | 6.9(6)    | C(46)-C(45)-C(48)-C(49) | -171.5(4) |
| C(3)-C(4)-C(17)-C(15)   | 7.4(5)    | C(47)-C(45)-C(48)-C(49) | 68.5(5)   |
| C(5)-C(4)-C(17)-C(15)   | -174.2(3) | C(44)-C(45)-C(48)-C(49) | -50.7(5)  |
| C(16)-C(15)-C(17)-N(1)  | 175.9(4)  | C(57)-N(2)-C(49)-C(48)  | -28.8(6)  |
| C(12)-C(15)-C(17)-N(1)  | -3.5(5)   | C(50)-N(2)-C(49)-C(48)  | 155.6(4)  |
| C(16)-C(15)-C(17)-C(4)  | -3.0(5)   | C(45)-C(48)-C(49)-N(2)  | 57.6(5)   |
| C(12)-C(15)-C(17)-C(4)  | 177.6(3)  | C(57)-N(2)-C(50)-C(51)  | -10.5(7)  |
| C(2)-C(1)-C(18)-C(19)   | -30.0(7)  | C(49)-N(2)-C(50)-C(51)  | 164.9(4)  |
| C(2)-C(1)-C(18)-C(32)   | 158.8(4)  | N(2)-C(50)-C(51)-C(52)  | 46.6(6)   |
| C(1)-C(18)-C(19)-C(20)  | -170.1(4) | C(50)-C(51)-C(52)-C(54) | 177.0(4)  |
| C(32)-C(18)-C(19)-C(20) | 2.6(5)    | C(50)-C(51)-C(52)-C(53) | 56.3(5)   |
| C(18)-C(19)-C(20)-C(22) | -2.3(5)   | C(50)-C(51)-C(52)-C(55) | -60.7(5)  |
| C(18)-C(19)-C(20)-C(21) | 178.0(4)  | C(51)-C(52)-C(55)-C(56) | -137.0(4) |
| C(19)-C(20)-C(22)-C(23) | 178.9(4)  | C(54)-C(52)-C(55)-C(56) | -16.7(6)  |
| C(21)-C(20)-C(22)-C(23) | -1.4(7)   | C(53)-C(52)-C(55)-C(56) | 104.4(4)  |

|                          |           |                          |            |
|--------------------------|-----------|--------------------------|------------|
| C(51)-C(52)-C(55)-C(57)  | 43.3(5)   | C(63)-C(64)-C(65)-C(67)  | 112.9(9)   |
| C(54)-C(52)-C(55)-C(57)  | 163.6(4)  | C(68)-C(64)-C(65)-C(67)  | -67.4(9)   |
| C(53)-C(52)-C(55)-C(57)  | -75.3(4)  | C(63)-C(64)-C(65)-C(66)  | -121.0(8)  |
| C(57)-C(55)-C(56)-C(42)  | -1.6(6)   | C(68)-C(64)-C(65)-C(66)  | 58.7(9)    |
| C(52)-C(55)-C(56)-C(42)  | 178.7(4)  | C(63)-C(64)-C(65A)-C(67) | 59(5)      |
| C(41)-C(42)-C(56)-C(55)  | -163.6(4) | C(68)-C(64)-C(65A)-C(67) | -114(4)    |
| C(43)-C(42)-C(56)-C(55)  | 9.2(6)    | C(63)-C(64)-C(65A)-C(66) | -84(3)     |
| C(49)-N(2)-C(57)-C(44)   | -4.3(6)   | C(68)-C(64)-C(65A)-C(66) | 103(3)     |
| C(50)-N(2)-C(57)-C(44)   | 170.8(4)  | C(63)-C(64)-C(68)-C(69)  | 4.3(8)     |
| C(49)-N(2)-C(57)-C(55)   | 176.3(4)  | C(65)-C(64)-C(68)-C(69)  | -175.4(5)  |
| C(50)-N(2)-C(57)-C(55)   | -8.6(6)   | C(65A)-C(64)-C(68)-C(69) | 179.5(14)  |
| C(43)-C(44)-C(57)-N(2)   | -168.9(4) | C(64)-C(68)-C(69)-C(70)  | 3.9(9)     |
| C(45)-C(44)-C(57)-N(2)   | 9.7(6)    | C(68)-C(69)-C(70)-C(72)  | -3.7(7)    |
| C(43)-C(44)-C(57)-C(55)  | 10.5(6)   | C(68)-C(69)-C(70)-C(71)  | 176.0(4)   |
| C(45)-C(44)-C(57)-C(55)  | -170.9(3) | C(69)-C(70)-C(72)-C(58)  | -177.6(4)  |
| C(56)-C(55)-C(57)-N(2)   | 170.8(4)  | C(71)-C(70)-C(72)-C(58)  | 2.7(6)     |
| C(52)-C(55)-C(57)-N(2)   | -9.4(6)   | C(69)-C(70)-C(72)-C(62)  | -5.1(6)    |
| C(56)-C(55)-C(57)-C(44)  | -8.6(6)   | C(71)-C(70)-C(72)-C(62)  | 175.2(3)   |
| C(52)-C(55)-C(57)-C(44)  | 171.1(4)  | C(59)-C(58)-C(72)-C(70)  | 172.6(4)   |
| C(42)-C(41)-C(58)-C(59)  | -34.8(6)  | C(41)-C(58)-C(72)-C(70)  | -16.1(7)   |
| C(42)-C(41)-C(58)-C(72)  | 155.1(4)  | C(59)-C(58)-C(72)-C(62)  | -1.1(4)    |
| C(41)-C(58)-C(59)-C(60)  | -170.7(4) | C(41)-C(58)-C(72)-C(62)  | 170.1(4)   |
| C(72)-C(58)-C(59)-C(60)  | 1.3(5)    | C(63)-C(62)-C(72)-C(70)  | 9.6(6)     |
| C(58)-C(59)-C(60)-C(62)  | -1.0(5)   | C(60)-C(62)-C(72)-C(70)  | -173.3(4)  |
| C(58)-C(59)-C(60)-C(61)  | 175.5(4)  | C(63)-C(62)-C(72)-C(58)  | -176.6(4)  |
| C(59)-C(60)-C(62)-C(63)  | 177.6(4)  | C(60)-C(62)-C(72)-C(58)  | 0.6(4)     |
| C(61)-C(60)-C(62)-C(63)  | 1.3(7)    | F(11A)-P(2)-F(7)-F(10A)  | 81.4(13)   |
| C(59)-C(60)-C(62)-C(72)  | 0.2(5)    | F(9A)-P(2)-F(7)-F(10A)   | -176.4(16) |
| C(61)-C(60)-C(62)-C(72)  | -176.1(4) | F(12A)-P(2)-F(7)-F(10A)  | -86.1(14)  |
| C(60)-C(62)-C(63)-C(64)  | -178.8(4) | F(11A)-P(2)-F(10A)-F(7)  | -97.6(9)   |
| C(72)-C(62)-C(63)-C(64)  | -2.0(7)   | F(8)-P(2)-F(10A)-F(7)    | -172.7(4)  |
| C(62)-C(63)-C(64)-C(68)  | -6.5(8)   | F(9A)-P(2)-F(10A)-F(7)   | 8(4)       |
| C(62)-C(63)-C(64)-C(65)  | 173.2(5)  | F(12A)-P(2)-F(10A)-F(7)  | 71.7(8)    |
| C(62)-C(63)-C(64)-C(65A) | -178(2)   |                          |            |

---

**Table S22:** Crystal data and structure refinement for **32**

|                                   |                                                    |                 |
|-----------------------------------|----------------------------------------------------|-----------------|
| CCDC code                         | #2129315                                           |                 |
| Empirical formula                 | C <sub>26</sub> H <sub>26</sub> F <sub>6</sub> NPS |                 |
| Formula weight                    | 529.51                                             |                 |
| Temperature                       | 150.00(10) K                                       |                 |
| Wavelength                        | 1.54184 Å                                          |                 |
| Crystal system                    | Monoclinic                                         |                 |
| Space group                       | P2 <sub>1</sub> /c                                 |                 |
| Unit cell dimensions              | a = 7.4072(2) Å                                    | α = 90°.        |
|                                   | b = 15.5867(5) Å                                   | β = 99.378(2)°. |
|                                   | c = 21.6148(6) Å                                   | γ = 90°.        |
| Volume                            | 2462.16(12) Å <sup>3</sup>                         |                 |
| Z                                 | 4                                                  |                 |
| Density (calculated)              | 1.428 Mg/m <sup>3</sup>                            |                 |
| Absorption coefficient            | 2.334 mm <sup>-1</sup>                             |                 |
| F(000)                            | 1096                                               |                 |
| Crystal size                      | 0.250 x 0.050 x 0.020 mm <sup>3</sup>              |                 |
| Theta range for data collection   | 3.512 to 72.905°.                                  |                 |
| Index ranges                      | -9 ≤ h ≤ 7, -17 ≤ k ≤ 19, -26 ≤ l ≤ 25             |                 |
| Reflections collected             | 16632                                              |                 |
| Independent reflections           | 4834 [R(int) = 0.0469]                             |                 |
| Completeness to theta = 67.684°   | 100.0 %                                            |                 |
| Absorption correction             | Semi-empirical from equivalents                    |                 |
| Max. and min. transmission        | 1.00000 and 0.86900                                |                 |
| Refinement method                 | Full-matrix least-squares on F <sup>2</sup>        |                 |
| Data / restraints / parameters    | 4834 / 72 / 376                                    |                 |
| Goodness-of-fit on F <sup>2</sup> | 1.023                                              |                 |
| Final R indices [I > 2σ(I)]       | R1 = 0.0460, wR2 = 0.1048                          |                 |
| R indices (all data)              | R1 = 0.0634, wR2 = 0.1143                          |                 |
| Extinction coefficient            | n/a                                                |                 |
| Largest diff. peak and hole       | 0.365 and -0.284 e.Å <sup>-3</sup>                 |                 |

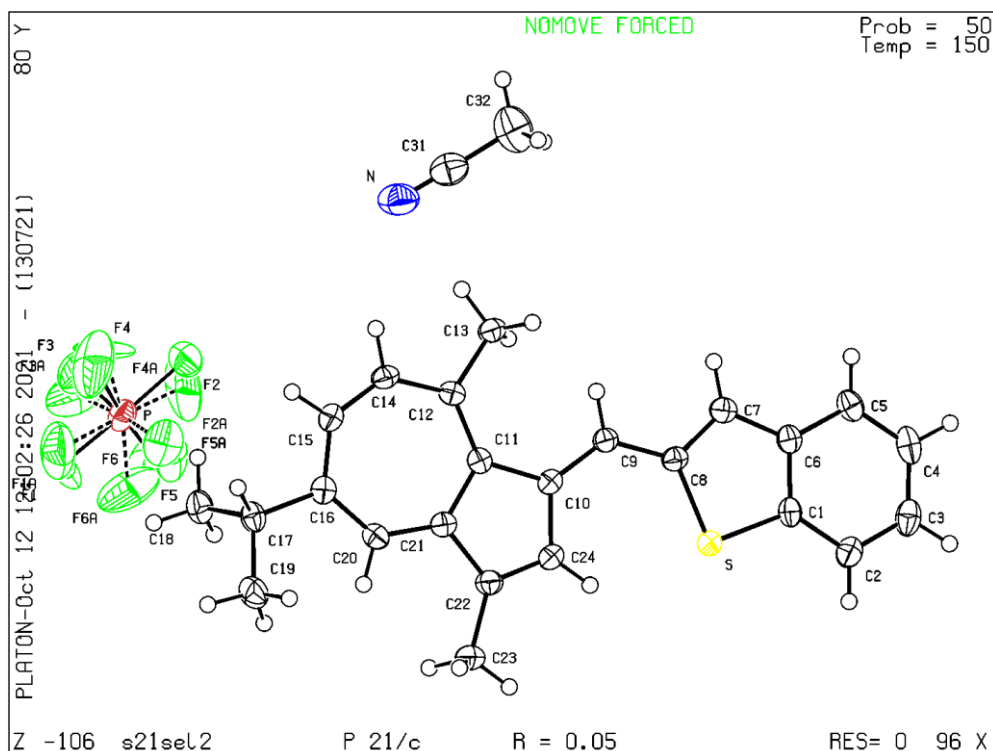

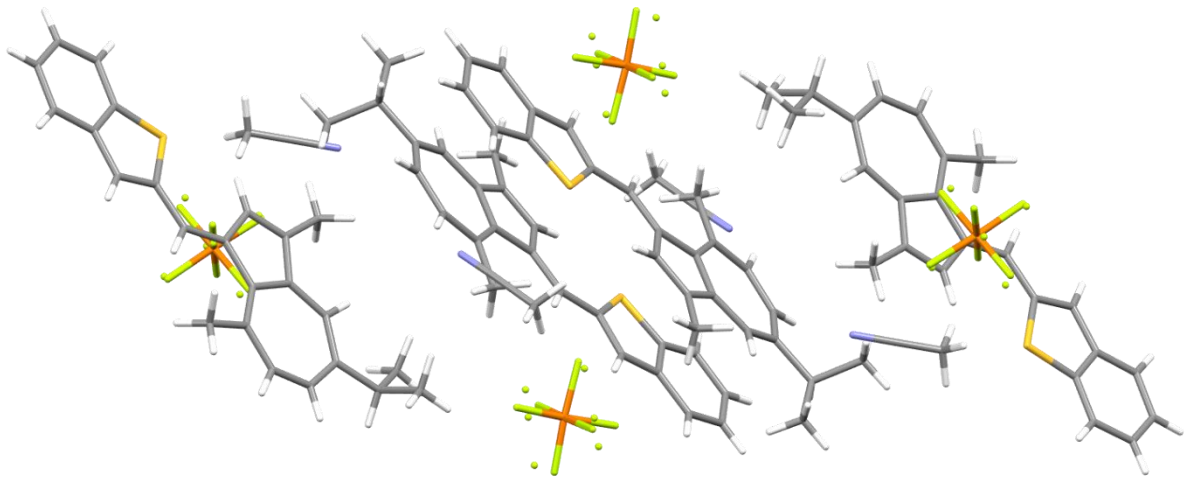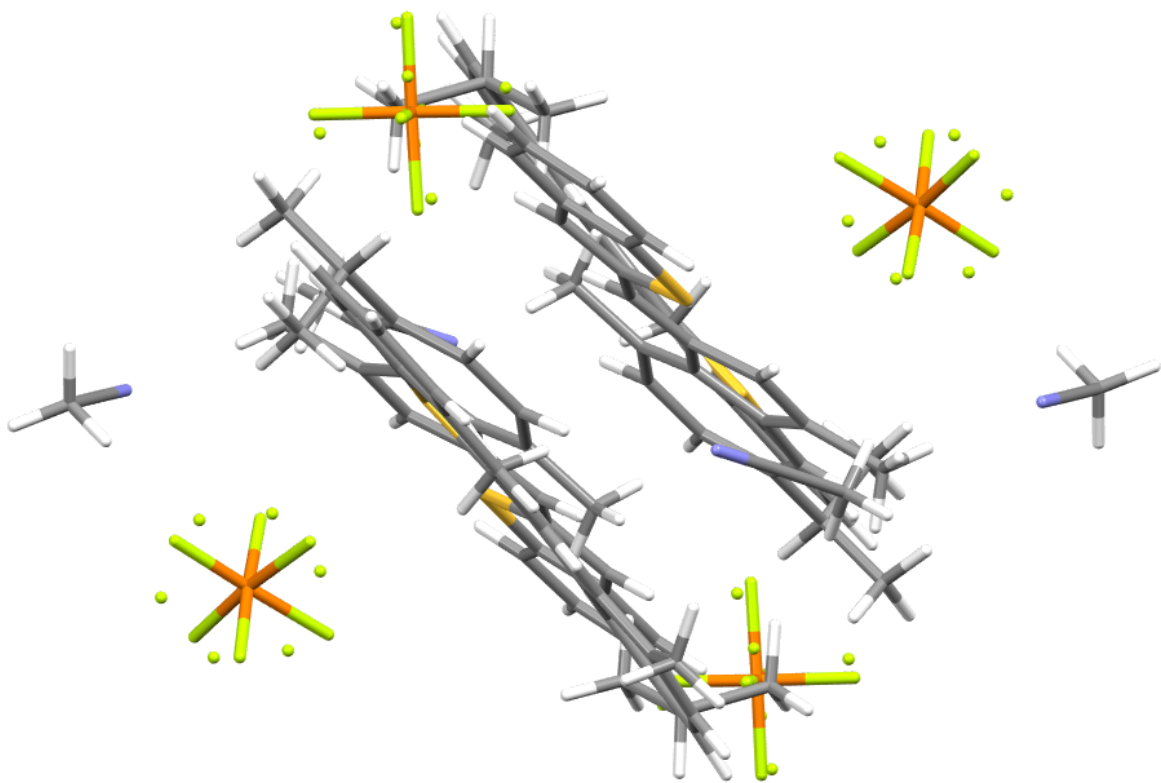

**Table S23:** Atomic coordinates ( $\times 10^4$ ) and equivalent isotropic displacement parameters ( $\text{\AA}^2 \times 10^3$ ) for **32**.  $U(\text{eq})$  is defined as one third of the trace of the orthogonalized  $U^{ij}$  tensor.

|       | x        | y        | z        | U(eq)  |
|-------|----------|----------|----------|--------|
| S     | 1200(1)  | 3855(1)  | 4339(1)  | 25(1)  |
| C(1)  | 168(3)   | 4119(2)  | 3583(1)  | 25(1)  |
| C(2)  | -630(3)  | 3545(2)  | 3122(1)  | 32(1)  |
| C(3)  | -1393(3) | 3882(2)  | 2550(1)  | 35(1)  |
| C(4)  | -1381(3) | 4765(2)  | 2435(1)  | 35(1)  |
| C(5)  | -582(3)  | 5331(2)  | 2887(1)  | 31(1)  |
| C(6)  | 228(3)   | 5008(2)  | 3477(1)  | 26(1)  |
| C(7)  | 1146(3)  | 5454(2)  | 4013(1)  | 26(1)  |
| C(8)  | 1745(3)  | 4930(1)  | 4514(1)  | 24(1)  |
| C(9)  | 2685(3)  | 5257(2)  | 5096(1)  | 24(1)  |
| C(10) | 3289(3)  | 4835(1)  | 5648(1)  | 22(1)  |
| C(11) | 4322(3)  | 5187(2)  | 6236(1)  | 22(1)  |
| C(12) | 4799(3)  | 6041(1)  | 6376(1)  | 23(1)  |
| C(13) | 4154(3)  | 6762(2)  | 5926(1)  | 30(1)  |
| C(14) | 5905(3)  | 6316(2)  | 6938(1)  | 27(1)  |
| C(15) | 6677(3)  | 5894(2)  | 7477(1)  | 27(1)  |
| C(16) | 6568(3)  | 5034(2)  | 7654(1)  | 25(1)  |
| C(17) | 7466(3)  | 4808(2)  | 8317(1)  | 28(1)  |
| C(18) | 6291(4)  | 5160(2)  | 8782(1)  | 37(1)  |
| C(19) | 7826(4)  | 3855(2)  | 8426(1)  | 38(1)  |
| C(20) | 5652(3)  | 4412(2)  | 7267(1)  | 26(1)  |
| C(21) | 4710(3)  | 4466(2)  | 6654(1)  | 24(1)  |
| C(22) | 3885(3)  | 3707(2)  | 6341(1)  | 27(1)  |
| C(23) | 3916(4)  | 2834(2)  | 6626(1)  | 38(1)  |
| C(24) | 3067(3)  | 3931(2)  | 5757(1)  | 26(1)  |
| N     | 7486(4)  | 8328(2)  | 6537(1)  | 53(1)  |
| C(31) | 7414(4)  | 8575(2)  | 6042(2)  | 44(1)  |
| C(32) | 7294(5)  | 8913(3)  | 5408(2)  | 67(1)  |
| P     | 1651(1)  | 6852(1)  | 9359(1)  | 34(1)  |
| F(1)  | 2124(15) | 6353(6)  | 9975(4)  | 94(3)  |
| F(3)  | 669(12)  | 7572(5)  | 9710(3)  | 68(2)  |
| F(2)  | 1224(10) | 7414(3)  | 8714(2)  | 73(2)  |
| F(4)  | 3470(10) | 7401(6)  | 9525(3)  | 111(3) |
| F(5)  | 2626(13) | 6170(9)  | 8983(5)  | 85(3)  |
| F(6)  | -183(8)  | 6388(6)  | 9149(3)  | 100(2) |
| F(1A) | 2830(30) | 6488(18) | 9980(11) | 95(7)  |
| F(2A) | 460(30)  | 7145(16) | 8781(6)  | 107(7) |
| F(3A) | 360(30)  | 7335(14) | 9758(11) | 84(6)  |
| F(4A) | 2970(30) | 7595(7)  | 9410(9)  | 89(5)  |
| F(5A) | 2930(20) | 6310(20) | 9029(14) | 56(4)  |
| F(6A) | 350(20)  | 6036(11) | 9427(12) | 97(6)  |



**Table S24:** Bond lengths [Å] for **32**.

|              |          |              |           |
|--------------|----------|--------------|-----------|
| S-C(1)       | 1.738(2) | C(17)-C(18)  | 1.534(3)  |
| S-C(8)       | 1.751(2) | C(17)-H(17)  | 1.0000    |
| C(1)-C(2)    | 1.396(3) | C(18)-H(18A) | 0.9800    |
| C(1)-C(6)    | 1.406(3) | C(18)-H(18B) | 0.9800    |
| C(2)-C(3)    | 1.377(4) | C(18)-H(18C) | 0.9800    |
| C(2)-H(2)    | 0.9500   | C(19)-H(19A) | 0.9800    |
| C(3)-C(4)    | 1.400(4) | C(19)-H(19B) | 0.9800    |
| C(3)-H(3)    | 0.9500   | C(19)-H(19C) | 0.9800    |
| C(4)-C(5)    | 1.377(4) | C(20)-C(21)  | 1.397(3)  |
| C(4)-H(4)    | 0.9500   | C(20)-H(20)  | 0.9500    |
| C(5)-C(6)    | 1.411(3) | C(21)-C(22)  | 1.448(3)  |
| C(5)-H(5)    | 0.9500   | C(22)-C(24)  | 1.354(3)  |
| C(6)-C(7)    | 1.425(3) | C(22)-C(23)  | 1.492(3)  |
| C(7)-C(8)    | 1.370(3) | C(23)-H(23A) | 0.9800    |
| C(7)-H(7)    | 0.9500   | C(23)-H(23B) | 0.9800    |
| C(8)-C(9)    | 1.428(3) | C(23)-H(23C) | 0.9800    |
| C(9)-C(10)   | 1.373(3) | C(24)-H(24)  | 0.9500    |
| C(9)-H(9)    | 0.9500   | N-C(31)      | 1.132(4)  |
| C(10)-C(24)  | 1.442(3) | C(31)-C(32)  | 1.456(5)  |
| C(10)-C(11)  | 1.477(3) | C(32)-H(32A) | 0.9800    |
| C(11)-C(12)  | 1.397(3) | C(32)-H(32B) | 0.9800    |
| C(11)-C(21)  | 1.442(3) | C(32)-H(32C) | 0.9800    |
| C(12)-C(14)  | 1.417(3) | P-F(2A)      | 1.477(11) |
| C(12)-C(13)  | 1.512(3) | P-F(4A)      | 1.509(13) |
| C(13)-H(13A) | 0.9800   | P-F(5A)      | 1.53(2)   |
| C(13)-H(13B) | 0.9800   | P-F(1)       | 1.532(7)  |
| C(13)-H(13C) | 0.9800   | P-F(6)       | 1.541(5)  |
| C(14)-C(15)  | 1.378(3) | P-F(3A)      | 1.577(19) |
| C(14)-H(14)  | 0.9500   | P-F(1A)      | 1.58(2)   |
| C(15)-C(16)  | 1.400(3) | P-F(5)       | 1.583(11) |
| C(15)-H(15)  | 0.9500   | P-F(4)       | 1.587(6)  |
| C(16)-C(20)  | 1.385(3) | P-F(3)       | 1.595(7)  |
| C(16)-C(17)  | 1.519(3) | P-F(6A)      | 1.618(13) |
| C(17)-C(19)  | 1.520(4) | P-F(2)       | 1.633(5)  |

**Table S25:** Bond angles [°] for **32**.

|                     |            |                     |            |
|---------------------|------------|---------------------|------------|
| C(1)-S-C(8)         | 91.56(11)  | C(17)-C(18)-H(18A)  | 109.5      |
| C(2)-C(1)-C(6)      | 122.4(2)   | C(17)-C(18)-H(18B)  | 109.5      |
| C(2)-C(1)-S         | 126.1(2)   | H(18A)-C(18)-H(18B) | 109.5      |
| C(6)-C(1)-S         | 111.42(17) | C(17)-C(18)-H(18C)  | 109.5      |
| C(3)-C(2)-C(1)      | 117.4(3)   | H(18A)-C(18)-H(18C) | 109.5      |
| C(3)-C(2)-H(2)      | 121.3      | H(18B)-C(18)-H(18C) | 109.5      |
| C(1)-C(2)-H(2)      | 121.3      | C(17)-C(19)-H(19A)  | 109.5      |
| C(2)-C(3)-C(4)      | 121.5(2)   | C(17)-C(19)-H(19B)  | 109.5      |
| C(2)-C(3)-H(3)      | 119.3      | H(19A)-C(19)-H(19B) | 109.5      |
| C(4)-C(3)-H(3)      | 119.3      | C(17)-C(19)-H(19C)  | 109.5      |
| C(5)-C(4)-C(3)      | 121.2(2)   | H(19A)-C(19)-H(19C) | 109.5      |
| C(5)-C(4)-H(4)      | 119.4      | H(19B)-C(19)-H(19C) | 109.5      |
| C(3)-C(4)-H(4)      | 119.4      | C(16)-C(20)-C(21)   | 130.6(2)   |
| C(4)-C(5)-C(6)      | 118.9(2)   | C(16)-C(20)-H(20)   | 114.7      |
| C(4)-C(5)-H(5)      | 120.6      | C(21)-C(20)-H(20)   | 114.7      |
| C(6)-C(5)-H(5)      | 120.6      | C(20)-C(21)-C(11)   | 131.3(2)   |
| C(1)-C(6)-C(5)      | 118.6(2)   | C(20)-C(21)-C(22)   | 120.1(2)   |
| C(1)-C(6)-C(7)      | 111.8(2)   | C(11)-C(21)-C(22)   | 108.60(19) |
| C(5)-C(6)-C(7)      | 129.5(2)   | C(24)-C(22)-C(21)   | 108.3(2)   |
| C(8)-C(7)-C(6)      | 113.7(2)   | C(24)-C(22)-C(23)   | 126.5(2)   |
| C(8)-C(7)-H(7)      | 123.1      | C(21)-C(22)-C(23)   | 125.2(2)   |
| C(6)-C(7)-H(7)      | 123.1      | C(22)-C(23)-H(23A)  | 109.5      |
| C(7)-C(8)-C(9)      | 122.2(2)   | C(22)-C(23)-H(23B)  | 109.5      |
| C(7)-C(8)-S         | 111.45(17) | H(23A)-C(23)-H(23B) | 109.5      |
| C(9)-C(8)-S         | 126.38(18) | C(22)-C(23)-H(23C)  | 109.5      |
| C(10)-C(9)-C(8)     | 129.7(2)   | H(23A)-C(23)-H(23C) | 109.5      |
| C(10)-C(9)-H(9)     | 115.2      | H(23B)-C(23)-H(23C) | 109.5      |
| C(8)-C(9)-H(9)      | 115.2      | C(22)-C(24)-C(10)   | 111.0(2)   |
| C(9)-C(10)-C(24)    | 125.4(2)   | C(22)-C(24)-H(24)   | 124.5      |
| C(9)-C(10)-C(11)    | 128.2(2)   | C(10)-C(24)-H(24)   | 124.5      |
| C(24)-C(10)-C(11)   | 106.30(19) | N-C(31)-C(32)       | 178.4(4)   |
| C(12)-C(11)-C(21)   | 126.1(2)   | C(31)-C(32)-H(32A)  | 109.5      |
| C(12)-C(11)-C(10)   | 128.2(2)   | C(31)-C(32)-H(32B)  | 109.5      |
| C(21)-C(11)-C(10)   | 105.72(19) | H(32A)-C(32)-H(32B) | 109.5      |
| C(11)-C(12)-C(14)   | 124.4(2)   | C(31)-C(32)-H(32C)  | 109.5      |
| C(11)-C(12)-C(13)   | 121.8(2)   | H(32A)-C(32)-H(32C) | 109.5      |
| C(14)-C(12)-C(13)   | 113.8(2)   | H(32B)-C(32)-H(32C) | 109.5      |
| C(12)-C(13)-H(13A)  | 109.5      | F(2A)-P-F(4A)       | 96.6(11)   |
| C(12)-C(13)-H(13B)  | 109.5      | F(2A)-P-F(5A)       | 96.0(13)   |
| H(13A)-C(13)-H(13B) | 109.5      | F(4A)-P-F(5A)       | 91.0(12)   |
| C(12)-C(13)-H(13C)  | 109.5      | F(1)-P-F(6)         | 94.8(4)    |
| H(13A)-C(13)-H(13C) | 109.5      | F(2A)-P-F(3A)       | 89.1(10)   |
| H(13B)-C(13)-H(13C) | 109.5      | F(4A)-P-F(3A)       | 92.2(10)   |
| C(15)-C(14)-C(12)   | 133.1(2)   | F(5A)-P-F(3A)       | 173.6(15)  |
| C(15)-C(14)-H(14)   | 113.4      | F(2A)-P-F(1A)       | 176.1(13)  |
| C(12)-C(14)-H(14)   | 113.4      | F(4A)-P-F(1A)       | 87.3(11)   |
| C(14)-C(15)-C(16)   | 130.8(2)   | F(5A)-P-F(1A)       | 84.3(15)   |
| C(14)-C(15)-H(15)   | 114.6      | F(3A)-P-F(1A)       | 90.3(13)   |
| C(16)-C(15)-H(15)   | 114.6      | F(1)-P-F(5)         | 92.7(6)    |
| C(20)-C(16)-C(15)   | 123.4(2)   | F(6)-P-F(5)         | 89.3(4)    |
| C(20)-C(16)-C(17)   | 120.2(2)   | F(1)-P-F(4)         | 90.6(4)    |
| C(15)-C(16)-C(17)   | 116.4(2)   | F(6)-P-F(4)         | 174.3(3)   |
| C(16)-C(17)-C(19)   | 114.4(2)   | F(5)-P-F(4)         | 92.1(5)    |
| C(16)-C(17)-C(18)   | 109.01(19) | F(1)-P-F(3)         | 90.1(4)    |
| C(19)-C(17)-C(18)   | 110.6(2)   | F(6)-P-F(3)         | 91.2(4)    |
| C(16)-C(17)-H(17)   | 107.5      | F(5)-P-F(3)         | 177.1(5)   |
| C(19)-C(17)-H(17)   | 107.5      | F(4)-P-F(3)         | 87.1(4)    |
| C(18)-C(17)-H(17)   | 107.5      | F(2A)-P-F(6A)       | 92.2(9)    |

|               |           |             |         |
|---------------|-----------|-------------|---------|
| F(4A)-P-F(6A) | 170.6(10) | F(6)-P-F(2) | 87.8(3) |
| F(5A)-P-F(6A) | 91.6(11)  | F(5)-P-F(2) | 87.8(5) |
| F(3A)-P-F(6A) | 84.4(9)   | F(4)-P-F(2) | 86.7(3) |
| F(1A)-P-F(6A) | 83.9(11)  | F(3)-P-F(2) | 89.4(3) |
| F(1)-P-F(2)   | 177.3(4)  |             |         |

**Table S26:** Anisotropic displacement parameters ( $\text{\AA}^2 \times 10^3$ ) for **32**. The anisotropic displacement factor exponent takes the form:  $-2\pi^2 [ h^2 a^{*2} U^{11} + \dots + 2 h k a^* b^* U^{12} ]$

|       | U <sup>11</sup> | U <sup>22</sup> | U <sup>33</sup> | U <sup>23</sup> | U <sup>13</sup> | U <sup>12</sup> |
|-------|-----------------|-----------------|-----------------|-----------------|-----------------|-----------------|
| S     | 29(1)           | 23(1)           | 24(1)           | 0(1)            | 3(1)            | 0(1)            |
| C(1)  | 22(1)           | 33(1)           | 21(1)           | -1(1)           | 4(1)            | 1(1)            |
| C(2)  | 31(1)           | 36(1)           | 29(1)           | -6(1)           | 6(1)            | -5(1)           |
| C(3)  | 26(1)           | 52(2)           | 27(1)           | -8(1)           | 5(1)            | -5(1)           |
| C(4)  | 26(1)           | 56(2)           | 21(1)           | 2(1)            | 3(1)            | 5(1)            |
| C(5)  | 28(1)           | 39(1)           | 26(1)           | 4(1)            | 7(1)            | 5(1)            |
| C(6)  | 23(1)           | 31(1)           | 24(1)           | 0(1)            | 7(1)            | 2(1)            |
| C(7)  | 26(1)           | 24(1)           | 29(1)           | 0(1)            | 9(1)            | 2(1)            |
| C(8)  | 24(1)           | 22(1)           | 27(1)           | -2(1)           | 9(1)            | 0(1)            |
| C(9)  | 25(1)           | 22(1)           | 24(1)           | -1(1)           | 8(1)            | -1(1)           |
| C(10) | 20(1)           | 23(1)           | 25(1)           | -3(1)           | 5(1)            | -1(1)           |
| C(11) | 18(1)           | 25(1)           | 23(1)           | 0(1)            | 6(1)            | 1(1)            |
| C(12) | 20(1)           | 23(1)           | 27(1)           | 2(1)            | 6(1)            | 1(1)            |
| C(13) | 35(1)           | 21(1)           | 31(1)           | -1(1)           | -1(1)           | -1(1)           |
| C(14) | 28(1)           | 21(1)           | 31(1)           | -2(1)           | 6(1)            | -4(1)           |
| C(15) | 26(1)           | 28(1)           | 25(1)           | -4(1)           | 3(1)            | -2(1)           |
| C(16) | 20(1)           | 30(1)           | 25(1)           | -2(1)           | 5(1)            | 1(1)            |
| C(17) | 24(1)           | 37(1)           | 23(1)           | 1(1)            | 2(1)            | -1(1)           |
| C(18) | 43(1)           | 44(2)           | 26(1)           | -1(1)           | 9(1)            | 1(1)            |
| C(19) | 42(1)           | 39(2)           | 31(1)           | 6(1)            | -2(1)           | 8(1)            |
| C(20) | 25(1)           | 27(1)           | 26(1)           | 4(1)            | 3(1)            | 0(1)            |
| C(21) | 22(1)           | 23(1)           | 27(1)           | -1(1)           | 7(1)            | 1(1)            |
| C(22) | 30(1)           | 23(1)           | 29(1)           | 0(1)            | 6(1)            | 0(1)            |
| C(23) | 54(2)           | 23(1)           | 34(1)           | 3(1)            | -1(1)           | -5(1)           |
| C(24) | 29(1)           | 23(1)           | 26(1)           | -4(1)           | 3(1)            | -2(1)           |
| N     | 51(2)           | 40(1)           | 65(2)           | 5(1)            | 2(1)            | -9(1)           |
| C(31) | 34(1)           | 40(2)           | 58(2)           | -2(1)           | 6(1)            | -3(1)           |
| C(32) | 64(2)           | 85(3)           | 55(2)           | 7(2)            | 16(2)           | 6(2)            |
| P     | 36(1)           | 34(1)           | 33(1)           | -8(1)           | 4(1)            | 4(1)            |
| F(1)  | 163(8)          | 80(4)           | 45(3)           | 34(3)           | 39(4)           | 57(5)           |
| F(3)  | 100(5)          | 54(3)           | 55(2)           | -17(2)          | 23(2)           | 24(3)           |
| F(2)  | 135(4)          | 42(2)           | 41(2)           | 3(1)            | 15(2)           | 13(2)           |
| F(4)  | 71(3)           | 186(7)          | 76(3)           | -43(4)          | 11(2)           | -64(4)          |
| F(5)  | 122(6)          | 89(5)           | 44(3)           | -14(3)          | 10(4)           | 63(5)           |
| F(6)  | 70(3)           | 107(5)          | 118(4)          | -23(3)          | 2(3)            | -47(3)          |
| F(1A) | 116(12)         | 111(11)         | 47(8)           | -10(7)          | -17(8)          | 39(9)           |
| F(2A) | 105(11)         | 157(14)         | 47(6)           | 7(8)            | -25(6)          | 85(10)          |
| F(3A) | 66(6)           | 63(11)          | 137(11)         | -30(7)          | 61(6)           | 9(6)            |
| F(4A) | 110(11)         | 24(5)           | 143(12)         | 27(5)           | 47(8)           | -19(5)          |
| F(5A) | 37(4)           | 72(8)           | 64(10)          | -15(6)          | 19(4)           | 21(5)           |
| F(6A) | 66(7)           | 73(8)           | 162(14)         | -43(8)          | 47(8)           | -39(6)          |

**Table S27:** Hydrogen coordinates ( $\times 10^4$ ) and isotropic displacement parameters ( $\text{\AA}^2 \times 10^{-3}$ ) for **32**.

|        | x     | y    | z    | U(eq) |
|--------|-------|------|------|-------|
| H(2)   | -645  | 2945 | 3201 | 38    |
| H(3)   | -1940 | 3506 | 2227 | 42    |
| H(4)   | -1935 | 4978 | 2037 | 42    |
| H(5)   | -575  | 5930 | 2804 | 37    |
| H(7)   | 1325  | 6057 | 4022 | 31    |
| H(9)   | 2930  | 5855 | 5101 | 28    |
| H(13A) | 4739  | 6711 | 5553 | 45    |
| H(13B) | 4484  | 7314 | 6131 | 45    |
| H(13C) | 2823  | 6729 | 5804 | 45    |
| H(14)  | 6169  | 6912 | 6945 | 32    |
| H(15)  | 7405  | 6246 | 7779 | 32    |
| H(17)  | 8673  | 5109 | 8399 | 34    |
| H(18A) | 6155  | 5782 | 8727 | 56    |
| H(18B) | 6886  | 5035 | 9211 | 56    |
| H(18C) | 5082  | 4889 | 8704 | 56    |
| H(19A) | 6659  | 3548 | 8386 | 57    |
| H(19B) | 8519  | 3767 | 8847 | 57    |
| H(19C) | 8534  | 3636 | 8114 | 57    |
| H(20)  | 5667  | 3856 | 7449 | 31    |
| H(23A) | 3213  | 2437 | 6327 | 58    |
| H(23B) | 3371  | 2858 | 7009 | 58    |
| H(23C) | 5183  | 2633 | 6728 | 58    |
| H(24)  | 2430  | 3544 | 5458 | 32    |
| H(32A) | 8236  | 8644 | 5202 | 101   |
| H(32B) | 7485  | 9535 | 5427 | 101   |
| H(32C) | 6083  | 8787 | 5169 | 101   |

**Table S28:** Torsion angles [°] for **32**.

|                         |             |                         |           |
|-------------------------|-------------|-------------------------|-----------|
| C(8)-S-C(1)-C(2)        | 179.0(2)    | C(10)-C(11)-C(12)-C(14) | -175.4(2) |
| C(8)-S-C(1)-C(6)        | -0.77(17)   | C(21)-C(11)-C(12)-C(13) | -173.5(2) |
| C(6)-C(1)-C(2)-C(3)     | -0.8(3)     | C(10)-C(11)-C(12)-C(13) | 4.6(3)    |
| S-C(1)-C(2)-C(3)        | 179.51(18)  | C(11)-C(12)-C(14)-C(15) | -4.3(4)   |
| C(1)-C(2)-C(3)-C(4)     | -0.3(4)     | C(13)-C(12)-C(14)-C(15) | 175.6(2)  |
| C(2)-C(3)-C(4)-C(5)     | 0.9(4)      | C(12)-C(14)-C(15)-C(16) | -2.1(5)   |
| C(3)-C(4)-C(5)-C(6)     | -0.3(4)     | C(14)-C(15)-C(16)-C(20) | 3.4(4)    |
| C(2)-C(1)-C(6)-C(5)     | 1.3(3)      | C(14)-C(15)-C(16)-C(17) | -174.6(2) |
| S-C(1)-C(6)-C(5)        | -178.91(17) | C(20)-C(16)-C(17)-C(19) | 19.6(3)   |
| C(2)-C(1)-C(6)-C(7)     | -178.7(2)   | C(15)-C(16)-C(17)-C(19) | -162.4(2) |
| S-C(1)-C(6)-C(7)        | 1.0(2)      | C(20)-C(16)-C(17)-C(18) | -104.8(3) |
| C(4)-C(5)-C(6)-C(1)     | -0.8(3)     | C(15)-C(16)-C(17)-C(18) | 73.2(3)   |
| C(4)-C(5)-C(6)-C(7)     | 179.3(2)    | C(15)-C(16)-C(20)-C(21) | 1.0(4)    |
| C(1)-C(6)-C(7)-C(8)     | -0.8(3)     | C(17)-C(16)-C(20)-C(21) | 178.9(2)  |
| C(5)-C(6)-C(7)-C(8)     | 179.1(2)    | C(16)-C(20)-C(21)-C(11) | -2.9(4)   |
| C(6)-C(7)-C(8)-C(9)     | -179.6(2)   | C(16)-C(20)-C(21)-C(22) | 178.8(2)  |
| C(6)-C(7)-C(8)-S        | 0.2(2)      | C(12)-C(11)-C(21)-C(20) | -2.0(4)   |
| C(1)-S-C(8)-C(7)        | 0.32(17)    | C(10)-C(11)-C(21)-C(20) | 179.5(2)  |
| C(1)-S-C(8)-C(9)        | -179.9(2)   | C(12)-C(11)-C(21)-C(22) | 176.4(2)  |
| C(7)-C(8)-C(9)-C(10)    | 176.3(2)    | C(10)-C(11)-C(21)-C(22) | -2.1(2)   |
| S-C(8)-C(9)-C(10)       | -3.5(4)     | C(20)-C(21)-C(22)-C(24) | -179.9(2) |
| C(8)-C(9)-C(10)-C(24)   | -0.6(4)     | C(11)-C(21)-C(22)-C(24) | 1.4(3)    |
| C(8)-C(9)-C(10)-C(11)   | 177.5(2)    | C(20)-C(21)-C(22)-C(23) | 1.1(4)    |
| C(9)-C(10)-C(11)-C(12)  | 5.2(4)      | C(11)-C(21)-C(22)-C(23) | -177.6(2) |
| C(24)-C(10)-C(11)-C(12) | -176.5(2)   | C(21)-C(22)-C(24)-C(10) | -0.2(3)   |
| C(9)-C(10)-C(11)-C(21)  | -176.4(2)   | C(23)-C(22)-C(24)-C(10) | 178.8(2)  |
| C(24)-C(10)-C(11)-C(21) | 1.9(2)      | C(9)-C(10)-C(24)-C(22)  | 177.3(2)  |
| C(21)-C(11)-C(12)-C(14) | 6.5(3)      | C(11)-C(10)-C(24)-C(22) | -1.1(3)   |

**Table S29:** Crystal data and structure refinement for **36**.

|                                   |                                             |                 |
|-----------------------------------|---------------------------------------------|-----------------|
| CCDC code                         | #2129310                                    |                 |
| Empirical formula                 | C <sub>32</sub> H <sub>28</sub>             |                 |
| Formula weight                    | 412.54                                      |                 |
| Temperature                       | 150.00(10) K                                |                 |
| Wavelength                        | 1.54184 Å                                   |                 |
| Crystal system                    | Monoclinic                                  |                 |
| Space group                       | P2 <sub>1</sub>                             |                 |
| Unit cell dimensions              | a = 11.9223(4) Å                            | α = 90°.        |
|                                   | b = 4.9868(2) Å                             | β = 98.446(3)°. |
|                                   | c = 18.1330(7) Å                            | γ = 90°.        |
| Volume                            | 1066.39(7) Å <sup>3</sup>                   |                 |
| Z                                 | 2                                           |                 |
| Density (calculated)              | 1.285 Mg/m <sup>3</sup>                     |                 |
| Absorption coefficient            | 0.543 mm <sup>-1</sup>                      |                 |
| F(000)                            | 440                                         |                 |
| Crystal size                      | 0.210 x 0.040 x 0.030 mm <sup>3</sup>       |                 |
| Theta range for data collection   | 3.748 to 72.881°.                           |                 |
| Index ranges                      | -14 ≤ h ≤ 14, -6 ≤ k ≤ 4, -22 ≤ l ≤ 22      |                 |
| Reflections collected             | 6420                                        |                 |
| Independent reflections           | 3075 [R(int) = 0.0339]                      |                 |
| Completeness to theta = 67.684°   | 99.9 %                                      |                 |
| Absorption correction             | Semi-empirical from equivalents             |                 |
| Max. and min. transmission        | 1.00000 and 0.85750                         |                 |
| Refinement method                 | Full-matrix least-squares on F <sup>2</sup> |                 |
| Data / restraints / parameters    | 3075 / 1 / 293                              |                 |
| Goodness-of-fit on F <sup>2</sup> | 1.034                                       |                 |
| Final R indices [I > 2σ(I)]       | R1 = 0.0399, wR2 = 0.0943                   |                 |
| R indices (all data)              | R1 = 0.0461, wR2 = 0.0986                   |                 |
| Absolute structure parameter      | -1.4(10)                                    |                 |
| Extinction coefficient            | n/a                                         |                 |
| Largest diff. peak and hole       | 0.175 and -0.197 e.Å <sup>-3</sup>          |                 |

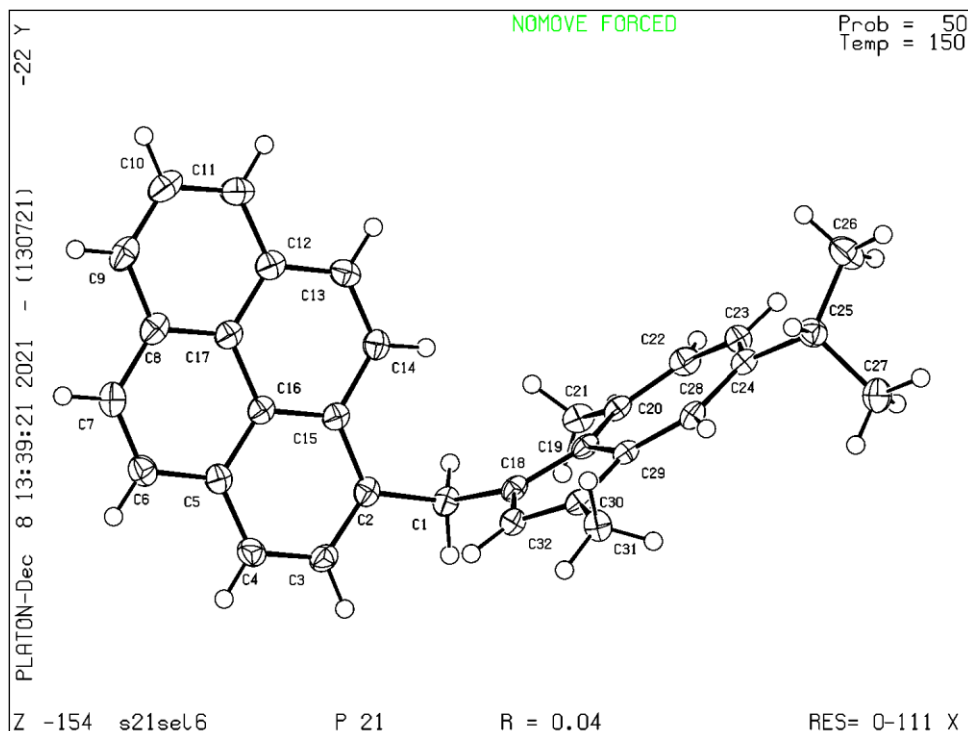

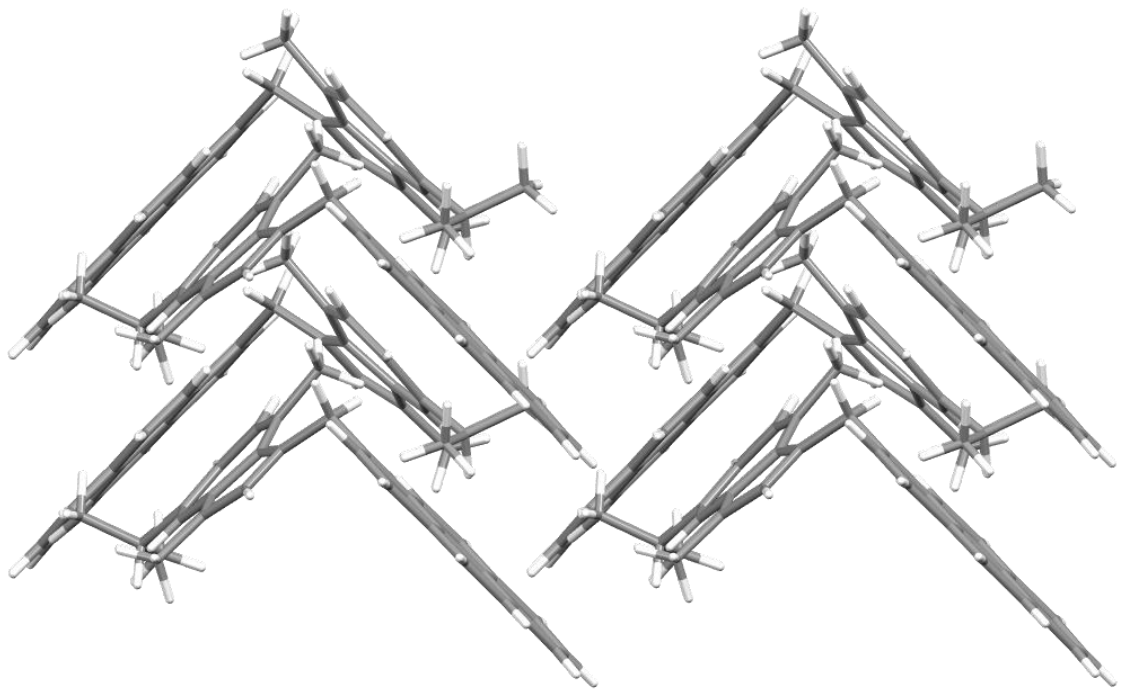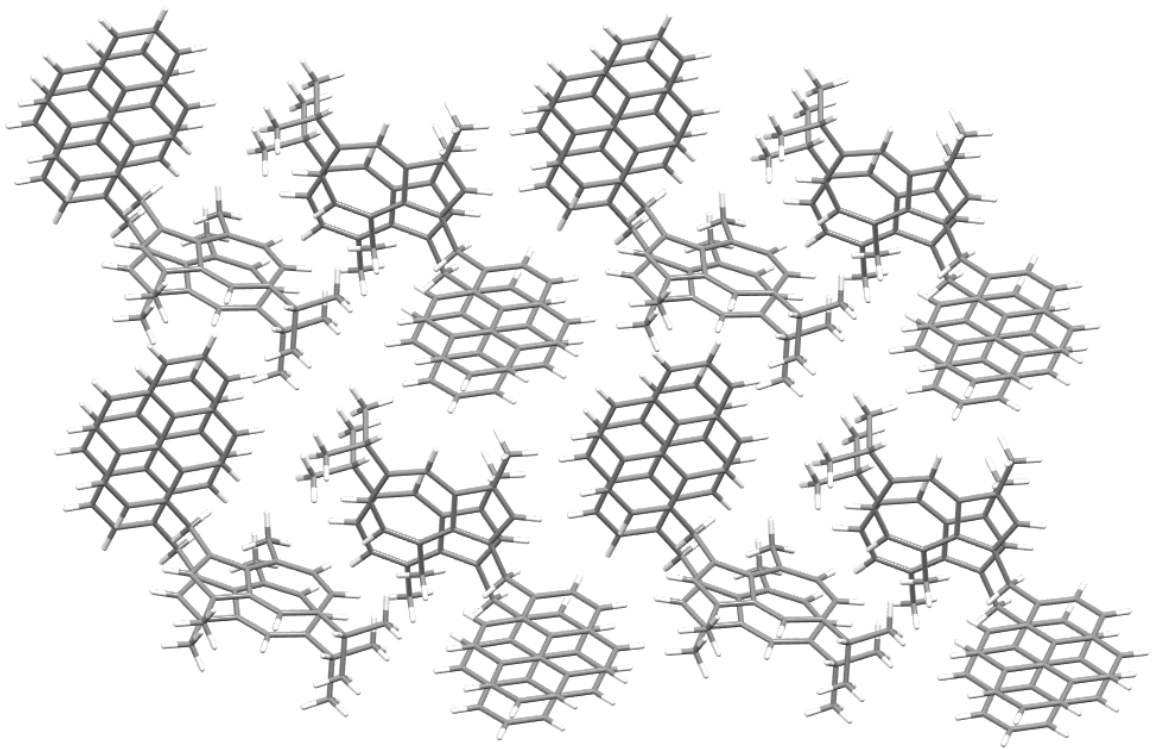

**Table S30:** Atomic coordinates ( $\times 10^4$ ) and equivalent isotropic displacement parameters ( $\text{\AA}^2 \times 10^3$ ) for **36**.  $U(\text{eq})$  is defined as one third of the trace of the orthogonalized  $U^{ij}$  tensor.

|       | x        | y        | z       | U(eq) |
|-------|----------|----------|---------|-------|
| C(1)  | 5548(2)  | 692(5)   | 1861(1) | 23(1) |
| C(2)  | 6230(2)  | 2453(5)  | 1406(1) | 21(1) |
| C(3)  | 6063(2)  | 2255(6)  | 631(2)  | 24(1) |
| C(4)  | 6660(2)  | 3817(6)  | 193(1)  | 26(1) |
| C(5)  | 7465(2)  | 5674(5)  | 514(1)  | 22(1) |
| C(6)  | 8118(2)  | 7295(6)  | 76(2)   | 27(1) |
| C(7)  | 8879(2)  | 9086(6)  | 396(2)  | 28(1) |
| C(8)  | 9078(2)  | 9427(6)  | 1190(2) | 24(1) |
| C(9)  | 9857(2)  | 11318(6) | 1533(2) | 29(1) |
| C(10) | 10051(2) | 11572(6) | 2303(2) | 32(1) |
| C(11) | 9469(2)  | 9983(6)  | 2748(2) | 29(1) |
| C(12) | 8665(2)  | 8096(6)  | 2430(2) | 24(1) |
| C(13) | 8033(2)  | 6454(6)  | 2866(1) | 24(1) |
| C(14) | 7256(2)  | 4661(5)  | 2548(1) | 22(1) |
| C(15) | 7030(2)  | 4318(5)  | 1751(1) | 20(1) |
| C(16) | 7651(2)  | 5925(5)  | 1304(1) | 21(1) |
| C(17) | 8467(2)  | 7813(5)  | 1640(2) | 22(1) |
| C(18) | 4576(2)  | 2213(5)  | 2124(1) | 20(1) |
| C(19) | 4180(2)  | 2298(5)  | 2816(1) | 19(1) |
| C(20) | 4516(2)  | 769(5)   | 3468(1) | 20(1) |
| C(21) | 5332(2)  | -1530(5) | 3446(2) | 24(1) |
| C(22) | 4148(2)  | 1164(6)  | 4157(1) | 24(1) |
| C(23) | 3393(2)  | 2987(6)  | 4407(1) | 24(1) |
| C(24) | 2693(2)  | 4903(5)  | 4025(1) | 22(1) |
| C(25) | 1878(2)  | 6513(6)  | 4426(1) | 25(1) |
| C(26) | 2256(3)  | 6908(7)  | 5260(2) | 35(1) |
| C(27) | 707(2)   | 5195(7)  | 4288(2) | 36(1) |
| C(28) | 2627(2)  | 5376(5)  | 3257(1) | 21(1) |
| C(29) | 3230(2)  | 4316(5)  | 2732(1) | 18(1) |
| C(30) | 3071(2)  | 5188(5)  | 1979(1) | 20(1) |
| C(31) | 2196(2)  | 7169(6)  | 1641(1) | 23(1) |
| C(32) | 3885(2)  | 3961(5)  | 1632(1) | 21(1) |



**Table S31:** Bond lengths [Å] for **36**.

---

|             |          |              |          |
|-------------|----------|--------------|----------|
| C(1)-C(18)  | 1.519(3) | C(18)-C(32)  | 1.421(3) |
| C(1)-C(2)   | 1.521(3) | C(19)-C(20)  | 1.415(3) |
| C(1)-H(1A)  | 0.9900   | C(19)-C(29)  | 1.505(3) |
| C(1)-H(1B)  | 0.9900   | C(20)-C(22)  | 1.397(4) |
| C(2)-C(3)   | 1.393(3) | C(20)-C(21)  | 1.507(3) |
| C(2)-C(15)  | 1.411(4) | C(21)-H(21A) | 0.9800   |
| C(3)-C(4)   | 1.382(4) | C(21)-H(21B) | 0.9800   |
| C(3)-H(3)   | 0.9500   | C(21)-H(21C) | 0.9800   |
| C(4)-C(5)   | 1.398(4) | C(22)-C(23)  | 1.401(4) |
| C(4)-H(4)   | 0.9500   | C(22)-H(22)  | 0.9500   |
| C(5)-C(16)  | 1.424(3) | C(23)-C(24)  | 1.386(4) |
| C(5)-C(6)   | 1.440(4) | C(23)-H(23)  | 0.9500   |
| C(6)-C(7)   | 1.342(4) | C(24)-C(28)  | 1.403(3) |
| C(6)-H(6)   | 0.9500   | C(24)-C(25)  | 1.525(3) |
| C(7)-C(8)   | 1.435(4) | C(25)-C(26)  | 1.526(4) |
| C(7)-H(7)   | 0.9500   | C(25)-C(27)  | 1.530(4) |
| C(8)-C(9)   | 1.403(4) | C(25)-H(25)  | 1.0000   |
| C(8)-C(17)  | 1.421(4) | C(26)-H(26A) | 0.9800   |
| C(9)-C(10)  | 1.387(4) | C(26)-H(26B) | 0.9800   |
| C(9)-H(9)   | 0.9500   | C(26)-H(26C) | 0.9800   |
| C(10)-C(11) | 1.387(4) | C(27)-H(27A) | 0.9800   |
| C(10)-H(10) | 0.9500   | C(27)-H(27B) | 0.9800   |
| C(11)-C(12) | 1.405(4) | C(27)-H(27C) | 0.9800   |
| C(11)-H(11) | 0.9500   | C(28)-C(29)  | 1.379(3) |
| C(12)-C(17) | 1.424(4) | C(28)-H(28)  | 0.9500   |
| C(12)-C(13) | 1.427(4) | C(29)-C(30)  | 1.420(3) |
| C(13)-C(14) | 1.354(4) | C(30)-C(32)  | 1.376(3) |
| C(13)-H(13) | 0.9500   | C(30)-C(31)  | 1.500(3) |
| C(14)-C(15) | 1.440(3) | C(31)-H(31A) | 0.9800   |
| C(14)-H(14) | 0.9500   | C(31)-H(31B) | 0.9800   |
| C(15)-C(16) | 1.422(3) | C(31)-H(31C) | 0.9800   |
| C(16)-C(17) | 1.425(3) | C(32)-H(32)  | 0.9500   |
| C(18)-C(19) | 1.406(3) |              |          |

---

**Table S32:** Bond angles [°] for **36**.

|                   |          |                     |          |
|-------------------|----------|---------------------|----------|
| C(18)-C(1)-C(2)   | 112.1(2) | C(18)-C(19)-C(20)   | 129.7(2) |
| C(18)-C(1)-H(1A)  | 109.2    | C(18)-C(19)-C(29)   | 106.0(2) |
| C(2)-C(1)-H(1A)   | 109.2    | C(20)-C(19)-C(29)   | 124.2(2) |
| C(18)-C(1)-H(1B)  | 109.2    | C(22)-C(20)-C(19)   | 125.7(2) |
| C(2)-C(1)-H(1B)   | 109.2    | C(22)-C(20)-C(21)   | 114.9(2) |
| H(1A)-C(1)-H(1B)  | 107.9    | C(19)-C(20)-C(21)   | 119.5(2) |
| C(3)-C(2)-C(15)   | 118.8(2) | C(20)-C(21)-H(21A)  | 109.5    |
| C(3)-C(2)-C(1)    | 119.9(2) | C(20)-C(21)-H(21B)  | 109.5    |
| C(15)-C(2)-C(1)   | 121.3(2) | H(21A)-C(21)-H(21B) | 109.5    |
| C(4)-C(3)-C(2)    | 122.0(2) | C(20)-C(21)-H(21C)  | 109.5    |
| C(4)-C(3)-H(3)    | 119.0    | H(21A)-C(21)-H(21C) | 109.5    |
| C(2)-C(3)-H(3)    | 119.0    | H(21B)-C(21)-H(21C) | 109.5    |
| C(3)-C(4)-C(5)    | 121.0(2) | C(20)-C(22)-C(23)   | 133.0(2) |
| C(3)-C(4)-H(4)    | 119.5    | C(20)-C(22)-H(22)   | 113.5    |
| C(5)-C(4)-H(4)    | 119.5    | C(23)-C(22)-H(22)   | 113.5    |
| C(4)-C(5)-C(16)   | 118.3(2) | C(24)-C(23)-C(22)   | 130.9(2) |
| C(4)-C(5)-C(6)    | 122.4(2) | C(24)-C(23)-H(23)   | 114.6    |
| C(16)-C(5)-C(6)   | 119.3(2) | C(22)-C(23)-H(23)   | 114.6    |
| C(7)-C(6)-C(5)    | 121.4(2) | C(23)-C(24)-C(28)   | 123.6(2) |
| C(7)-C(6)-H(6)    | 119.3    | C(23)-C(24)-C(25)   | 120.2(2) |
| C(5)-C(6)-H(6)    | 119.3    | C(28)-C(24)-C(25)   | 116.0(2) |
| C(6)-C(7)-C(8)    | 121.0(3) | C(24)-C(25)-C(26)   | 115.2(2) |
| C(6)-C(7)-H(7)    | 119.5    | C(24)-C(25)-C(27)   | 109.0(2) |
| C(8)-C(7)-H(7)    | 119.5    | C(26)-C(25)-C(27)   | 110.3(2) |
| C(9)-C(8)-C(17)   | 119.2(2) | C(24)-C(25)-H(25)   | 107.4    |
| C(9)-C(8)-C(7)    | 121.7(3) | C(26)-C(25)-H(25)   | 107.4    |
| C(17)-C(8)-C(7)   | 119.1(2) | C(27)-C(25)-H(25)   | 107.4    |
| C(10)-C(9)-C(8)   | 120.6(3) | C(25)-C(26)-H(26A)  | 109.5    |
| C(10)-C(9)-H(9)   | 119.7    | C(25)-C(26)-H(26B)  | 109.5    |
| C(8)-C(9)-H(9)    | 119.7    | H(26A)-C(26)-H(26B) | 109.5    |
| C(9)-C(10)-C(11)  | 120.6(3) | C(25)-C(26)-H(26C)  | 109.5    |
| C(9)-C(10)-H(10)  | 119.7    | H(26A)-C(26)-H(26C) | 109.5    |
| C(11)-C(10)-H(10) | 119.7    | H(26B)-C(26)-H(26C) | 109.5    |
| C(10)-C(11)-C(12) | 120.9(3) | C(25)-C(27)-H(27A)  | 109.5    |
| C(10)-C(11)-H(11) | 119.6    | C(25)-C(27)-H(27B)  | 109.5    |
| C(12)-C(11)-H(11) | 119.6    | H(27A)-C(27)-H(27B) | 109.5    |
| C(11)-C(12)-C(17) | 118.8(2) | C(25)-C(27)-H(27C)  | 109.5    |
| C(11)-C(12)-C(13) | 122.7(2) | H(27A)-C(27)-H(27C) | 109.5    |
| C(17)-C(12)-C(13) | 118.5(2) | H(27B)-C(27)-H(27C) | 109.5    |
| C(14)-C(13)-C(12) | 121.8(2) | C(29)-C(28)-C(24)   | 131.4(2) |
| C(14)-C(13)-H(13) | 119.1    | C(29)-C(28)-H(28)   | 114.3    |
| C(12)-C(13)-H(13) | 119.1    | C(24)-C(28)-H(28)   | 114.3    |
| C(13)-C(14)-C(15) | 121.4(2) | C(28)-C(29)-C(30)   | 122.4(2) |
| C(13)-C(14)-H(14) | 119.3    | C(28)-C(29)-C(19)   | 130.3(2) |
| C(15)-C(14)-H(14) | 119.3    | C(30)-C(29)-C(19)   | 107.1(2) |
| C(2)-C(15)-C(16)  | 119.5(2) | C(32)-C(30)-C(29)   | 107.5(2) |
| C(2)-C(15)-C(14)  | 122.6(2) | C(32)-C(30)-C(31)   | 126.9(2) |
| C(16)-C(15)-C(14) | 117.9(2) | C(29)-C(30)-C(31)   | 125.6(2) |
| C(15)-C(16)-C(5)  | 120.5(2) | C(30)-C(31)-H(31A)  | 109.5    |
| C(15)-C(16)-C(17) | 120.6(2) | C(30)-C(31)-H(31B)  | 109.5    |
| C(5)-C(16)-C(17)  | 118.9(2) | H(31A)-C(31)-H(31B) | 109.5    |
| C(8)-C(17)-C(12)  | 119.9(2) | C(30)-C(31)-H(31C)  | 109.5    |
| C(8)-C(17)-C(16)  | 120.3(2) | H(31A)-C(31)-H(31C) | 109.5    |
| C(12)-C(17)-C(16) | 119.8(2) | H(31B)-C(31)-H(31C) | 109.5    |
| C(19)-C(18)-C(32) | 107.6(2) | C(30)-C(32)-C(18)   | 111.6(2) |
| C(19)-C(18)-C(1)  | 131.8(2) | C(30)-C(32)-H(32)   | 124.2    |
| C(32)-C(18)-C(1)  | 120.5(2) | C(18)-C(32)-H(32)   | 124.2    |

**Table S33:** Anisotropic displacement parameters ( $\text{\AA}^2 \times 10^3$ ) for **36**. The anisotropic displacement factor exponent takes the form:  $-2\pi^2 [ h^2 a^{*2} U^{11} + \dots + 2 h k a^* b^* U^{12} ]$

|       | $U^{11}$ | $U^{22}$ | $U^{33}$ | $U^{23}$ | $U^{13}$ | $U^{12}$ |
|-------|----------|----------|----------|----------|----------|----------|
| C(1)  | 21(1)    | 18(1)    | 31(1)    | -1(1)    | 7(1)     | 0(1)     |
| C(2)  | 18(1)    | 18(1)    | 28(1)    | -1(1)    | 6(1)     | 4(1)     |
| C(3)  | 18(1)    | 24(1)    | 31(1)    | -6(1)    | 4(1)     | 0(1)     |
| C(4)  | 23(1)    | 31(2)    | 23(1)    | -4(1)    | 4(1)     | 4(1)     |
| C(5)  | 21(1)    | 21(1)    | 26(1)    | 0(1)     | 5(1)     | 5(1)     |
| C(6)  | 27(1)    | 30(2)    | 24(1)    | 0(1)     | 5(1)     | 4(1)     |
| C(7)  | 26(1)    | 28(2)    | 31(1)    | 4(1)     | 9(1)     | 3(1)     |
| C(8)  | 18(1)    | 18(1)    | 37(2)    | 0(1)     | 4(1)     | 5(1)     |
| C(9)  | 20(1)    | 22(1)    | 46(2)    | -2(1)    | 8(1)     | 0(1)     |
| C(10) | 21(1)    | 25(2)    | 50(2)    | -8(1)    | 2(1)     | -1(1)    |
| C(11) | 24(1)    | 30(2)    | 31(1)    | -8(1)    | -1(1)    | 4(1)     |
| C(12) | 20(1)    | 21(1)    | 31(1)    | -3(1)    | 2(1)     | 5(1)     |
| C(13) | 24(1)    | 26(2)    | 23(1)    | -4(1)    | 1(1)     | 7(1)     |
| C(14) | 20(1)    | 21(1)    | 27(1)    | 1(1)     | 6(1)     | 4(1)     |
| C(15) | 16(1)    | 18(1)    | 26(1)    | -1(1)    | 2(1)     | 5(1)     |
| C(16) | 17(1)    | 18(1)    | 27(1)    | -1(1)    | 2(1)     | 5(1)     |
| C(17) | 18(1)    | 19(1)    | 30(1)    | -4(1)    | 3(1)     | 4(1)     |
| C(18) | 17(1)    | 15(1)    | 27(1)    | -1(1)    | 3(1)     | -2(1)    |
| C(19) | 15(1)    | 13(1)    | 27(1)    | -2(1)    | 1(1)     | -1(1)    |
| C(20) | 16(1)    | 15(1)    | 27(1)    | 0(1)     | 0(1)     | -2(1)    |
| C(21) | 24(1)    | 20(1)    | 28(1)    | 1(1)     | 0(1)     | 2(1)     |
| C(22) | 25(1)    | 23(1)    | 24(1)    | 5(1)     | -2(1)    | 1(1)     |
| C(23) | 24(1)    | 26(2)    | 21(1)    | 0(1)     | 4(1)     | -2(1)    |
| C(24) | 18(1)    | 23(1)    | 24(1)    | -1(1)    | 2(1)     | -3(1)    |
| C(25) | 26(1)    | 24(2)    | 25(1)    | -2(1)    | 4(1)     | 2(1)     |
| C(26) | 36(2)    | 43(2)    | 26(1)    | -5(1)    | 4(1)     | 10(1)    |
| C(27) | 24(1)    | 47(2)    | 38(2)    | -8(1)    | 10(1)    | 1(1)     |
| C(28) | 16(1)    | 19(1)    | 26(1)    | 3(1)     | 2(1)     | 0(1)     |
| C(29) | 15(1)    | 17(1)    | 22(1)    | -1(1)    | 0(1)     | -2(1)    |
| C(30) | 18(1)    | 18(1)    | 24(1)    | 1(1)     | 1(1)     | 0(1)     |
| C(31) | 24(1)    | 23(1)    | 23(1)    | 6(1)     | 4(1)     | 6(1)     |
| C(32) | 21(1)    | 21(1)    | 22(1)    | 0(1)     | 4(1)     | -2(1)    |

**Table S34:** Hydrogen coordinates ( $\times 10^4$ ) and isotropic displacement parameters ( $\text{\AA}^2 \times 10^{-3}$ ) for **36**.

|        | x     | y     | z    | U(eq) |
|--------|-------|-------|------|-------|
| H(1A)  | 5241  | -857  | 1555 | 27    |
| H(1B)  | 6056  | -10   | 2300 | 27    |
| H(3)   | 5522  | 1008  | 397  | 29    |
| H(4)   | 6520  | 3627  | -334 | 31    |
| H(6)   | 8009  | 7093  | -451 | 32    |
| H(7)   | 9291  | 10142 | 92   | 33    |
| H(9)   | 10255 | 12434 | 1235 | 35    |
| H(10)  | 10588 | 12845 | 2528 | 39    |
| H(11)  | 9616  | 10174 | 3274 | 35    |
| H(13)  | 8161  | 6625  | 3393 | 29    |
| H(14)  | 6852  | 3606  | 2857 | 27    |
| H(21A) | 5291  | -2721 | 3871 | 37    |
| H(21B) | 6104  | -830  | 3471 | 37    |
| H(21C) | 5129  | -2533 | 2980 | 37    |
| H(22)  | 4476  | -49   | 4531 | 29    |
| H(23)  | 3355  | 2894  | 4926 | 28    |
| H(25)  | 1804  | 8333  | 4192 | 30    |
| H(26A) | 2209  | 5195  | 5519 | 52    |
| H(26B) | 1760  | 8222  | 5452 | 52    |
| H(26C) | 3039  | 7559  | 5345 | 52    |
| H(27A) | 173   | 6250  | 4531 | 53    |
| H(27B) | 757   | 3374  | 4493 | 53    |
| H(27C) | 442   | 5118  | 3750 | 53    |
| H(28)  | 2068  | 6651  | 3064 | 25    |
| H(31A) | 2426  | 8980  | 1810 | 35    |
| H(31B) | 1464  | 6736  | 1796 | 35    |
| H(31C) | 2128  | 7085  | 1096 | 35    |
| H(32)  | 3974  | 4247  | 1125 | 26    |

**Table S35:** Torsion angles [°] for **36**.

|                         |           |                         |           |
|-------------------------|-----------|-------------------------|-----------|
| C(18)-C(1)-C(2)-C(3)    | -101.6(3) | C(11)-C(12)-C(17)-C(16) | -179.6(2) |
| C(18)-C(1)-C(2)-C(15)   | 77.9(3)   | C(13)-C(12)-C(17)-C(16) | 0.1(3)    |
| C(15)-C(2)-C(3)-C(4)    | 0.3(4)    | C(15)-C(16)-C(17)-C(8)  | -179.5(2) |
| C(1)-C(2)-C(3)-C(4)     | 179.8(2)  | C(5)-C(16)-C(17)-C(8)   | 0.4(3)    |
| C(2)-C(3)-C(4)-C(5)     | 0.1(4)    | C(15)-C(16)-C(17)-C(12) | 0.1(4)    |
| C(3)-C(4)-C(5)-C(16)    | -0.3(4)   | C(5)-C(16)-C(17)-C(12)  | 180.0(2)  |
| C(3)-C(4)-C(5)-C(6)     | 178.7(3)  | C(2)-C(1)-C(18)-C(19)   | -135.7(3) |
| C(4)-C(5)-C(6)-C(7)     | 179.3(3)  | C(2)-C(1)-C(18)-C(32)   | 43.5(3)   |
| C(16)-C(5)-C(6)-C(7)    | -1.7(4)   | C(32)-C(18)-C(19)-C(20) | 174.2(2)  |
| C(5)-C(6)-C(7)-C(8)     | 0.7(4)    | C(1)-C(18)-C(19)-C(20)  | -6.5(5)   |
| C(6)-C(7)-C(8)-C(9)     | -179.0(3) | C(32)-C(18)-C(19)-C(29) | -2.6(3)   |
| C(6)-C(7)-C(8)-C(17)    | 0.8(4)    | C(1)-C(18)-C(19)-C(29)  | 176.6(3)  |
| C(17)-C(8)-C(9)-C(10)   | 1.5(4)    | C(18)-C(19)-C(20)-C(22) | 173.6(3)  |
| C(7)-C(8)-C(9)-C(10)    | -178.7(3) | C(19)-C(19)-C(20)-C(22) | -10.1(4)  |
| C(8)-C(9)-C(10)-C(11)   | -0.8(4)   | C(18)-C(19)-C(20)-C(21) | -7.1(4)   |
| C(9)-C(10)-C(11)-C(12)  | -0.4(4)   | C(29)-C(19)-C(20)-C(21) | 169.2(2)  |
| C(10)-C(11)-C(12)-C(17) | 0.8(4)    | C(19)-C(20)-C(22)-C(23) | 0.8(5)    |
| C(10)-C(11)-C(12)-C(13) | -178.9(3) | C(21)-C(20)-C(22)-C(23) | -178.5(3) |
| C(11)-C(12)-C(13)-C(14) | 179.5(2)  | C(20)-C(22)-C(23)-C(24) | 5.4(5)    |
| C(17)-C(12)-C(13)-C(14) | -0.2(4)   | C(22)-C(23)-C(24)-C(28) | -0.4(5)   |
| C(12)-C(13)-C(14)-C(15) | 0.1(4)    | C(22)-C(23)-C(24)-C(25) | 175.5(3)  |
| C(3)-C(2)-C(15)-C(16)   | -0.6(3)   | C(23)-C(24)-C(25)-C(26) | 28.2(4)   |
| C(1)-C(2)-C(15)-C(16)   | 179.9(2)  | C(28)-C(24)-C(25)-C(26) | -155.6(3) |
| C(3)-C(2)-C(15)-C(14)   | 179.9(2)  | C(23)-C(24)-C(25)-C(27) | -96.4(3)  |
| C(1)-C(2)-C(15)-C(14)   | 0.4(4)    | C(28)-C(24)-C(25)-C(27) | 79.8(3)   |
| C(13)-C(14)-C(15)-C(2)  | 179.6(2)  | C(23)-C(24)-C(28)-C(29) | -4.7(4)   |
| C(13)-C(14)-C(15)-C(16) | 0.1(4)    | C(25)-C(24)-C(28)-C(29) | 179.3(3)  |
| C(2)-C(15)-C(16)-C(5)   | 0.4(3)    | C(24)-C(28)-C(29)-C(30) | -176.4(3) |
| C(14)-C(15)-C(16)-C(5)  | 179.9(2)  | C(24)-C(28)-C(29)-C(19) | -0.8(5)   |
| C(2)-C(15)-C(16)-C(17)  | -179.7(2) | C(18)-C(19)-C(29)-C(28) | -172.5(3) |
| C(14)-C(15)-C(16)-C(17) | -0.2(3)   | C(20)-C(19)-C(29)-C(28) | 10.4(4)   |
| C(4)-C(5)-C(16)-C(15)   | 0.1(3)    | C(18)-C(19)-C(29)-C(30) | 3.6(3)    |
| C(6)-C(5)-C(16)-C(15)   | -179.0(2) | C(20)-C(19)-C(29)-C(30) | -173.4(2) |
| C(4)-C(5)-C(16)-C(17)   | -179.8(2) | C(28)-C(29)-C(30)-C(32) | 173.3(2)  |
| C(6)-C(5)-C(16)-C(17)   | 1.1(4)    | C(19)-C(29)-C(30)-C(32) | -3.2(3)   |
| C(9)-C(8)-C(17)-C(12)   | -1.1(4)   | C(28)-C(29)-C(30)-C(31) | -4.6(4)   |
| C(7)-C(8)-C(17)-C(12)   | 179.1(2)  | C(19)-C(29)-C(30)-C(31) | 178.9(2)  |
| C(9)-C(8)-C(17)-C(16)   | 178.5(2)  | C(29)-C(30)-C(32)-C(18) | 1.7(3)    |
| C(7)-C(8)-C(17)-C(16)   | -1.3(4)   | C(31)-C(30)-C(32)-C(18) | 179.5(2)  |
| C(11)-C(12)-C(17)-C(8)  | 0.0(4)    | C(19)-C(18)-C(32)-C(30) | 0.7(3)    |
| C(13)-C(12)-C(17)-C(8)  | 179.7(2)  | C(1)-C(18)-C(32)-C(30)  | -178.7(2) |
